# Supplementary material for: An efficient and practical entry to 2-amido-dienes and 3-amido-trienes from allenamides through stereoselective 1,3-hydrogen shifts
Source: publisher site journal article supplement (doi:10.3762/bjoc.7.53), 2011-04-07
Supplement: Additional file 2 [file 1860-5397-7-53-S2.pdf]

**Supporting Information**

for

**An efficient and practical entry to 2-amido-dienes  
and 3-amido-trienes from allenamides through  
stereoselective 1,3-hydrogen shifts.**

Ryuji Hayashi, John B. Feltenberger, Andrew G. Lohse, Mary C. Walton and Richard  
P. Hsung\*

Address: Department of Chemistry and Division of Pharmaceutical Sciences,  
University of Wisconsin, Madison, WI 53705

Email: Richard P. Hsung\* - [rhsung@wisc.edu](mailto:rhsung@wisc.edu)

\*Corresponding author

**Proton and carbon NMR spectra, and NOE data.**

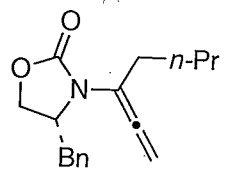

5a

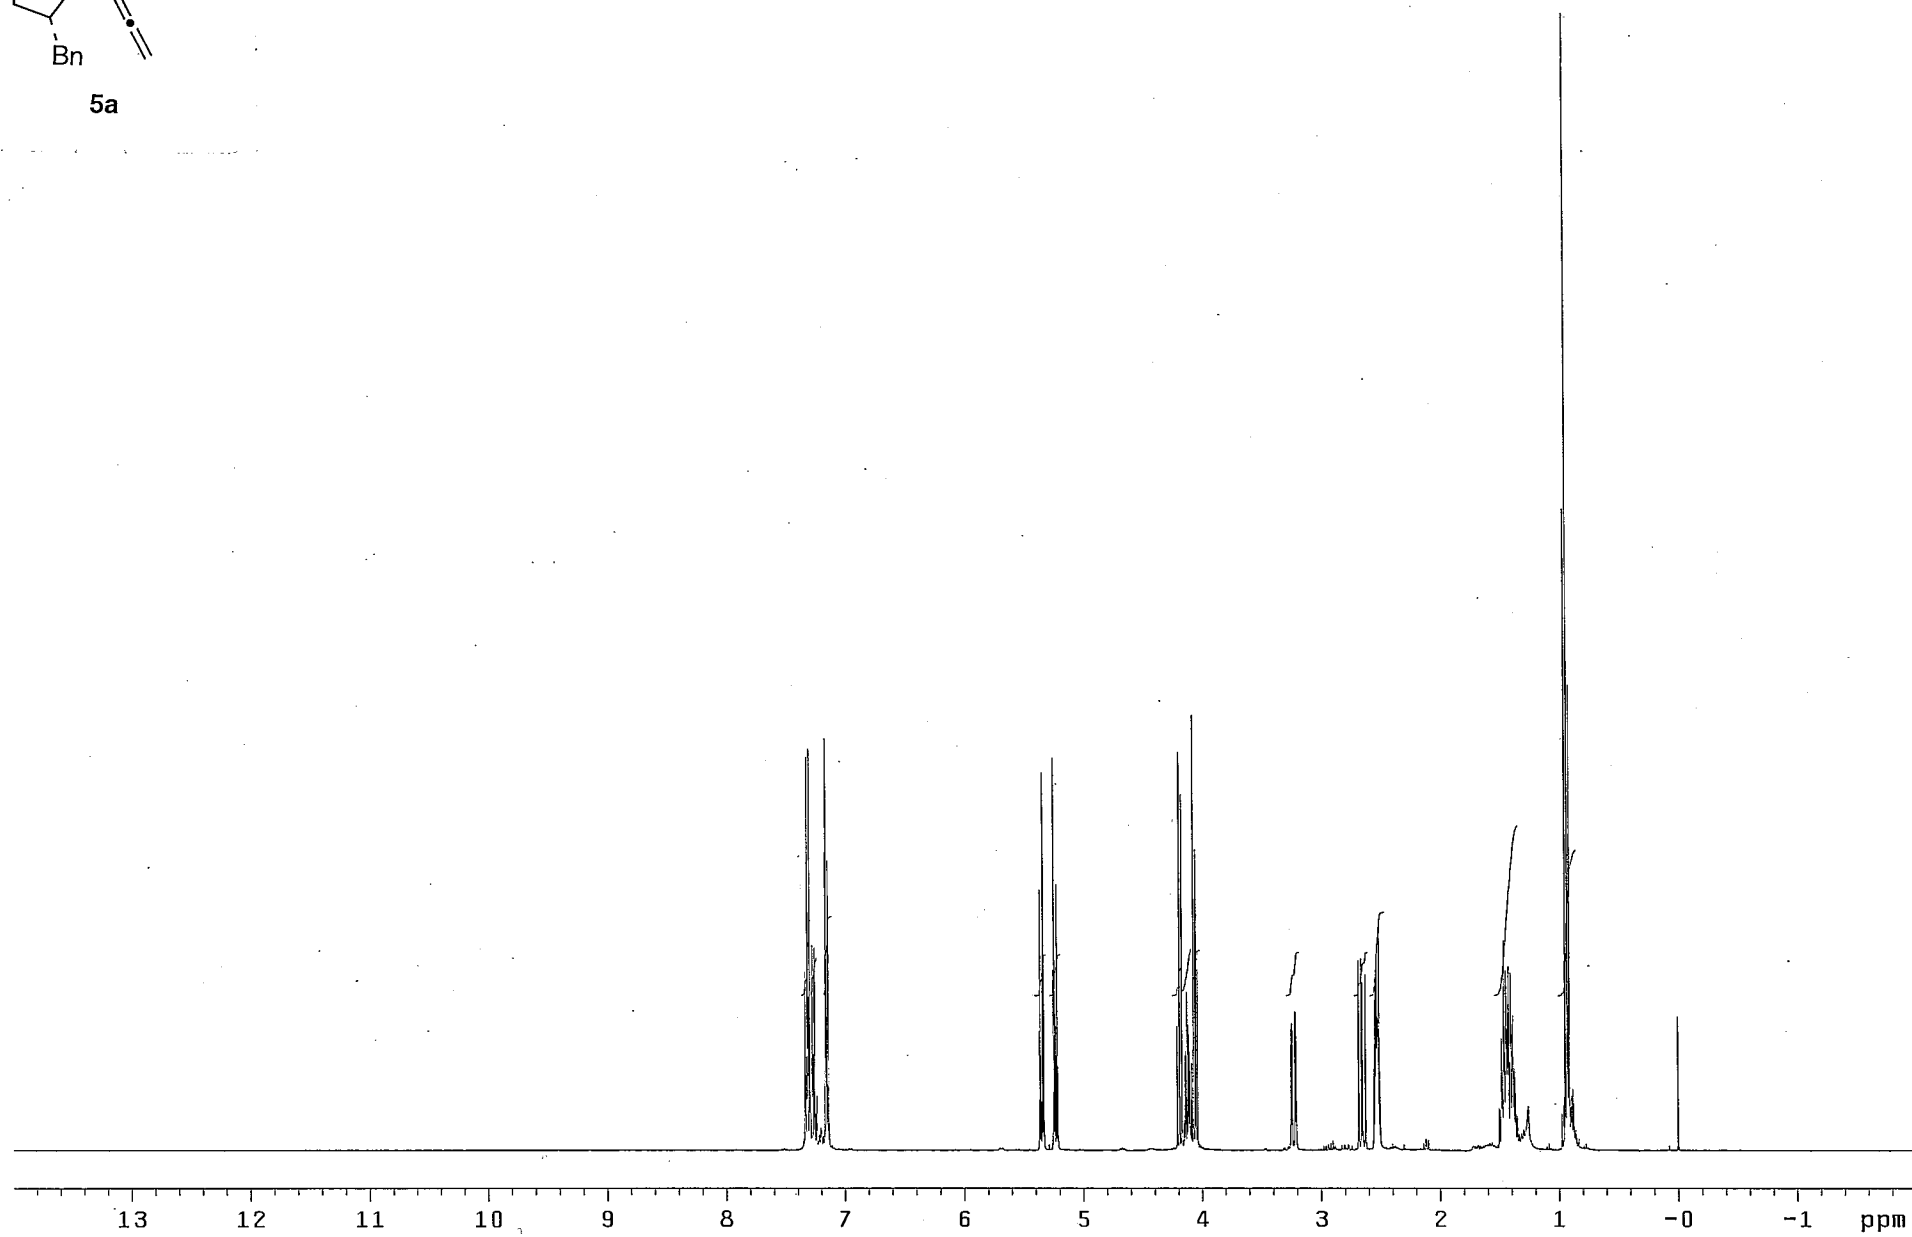

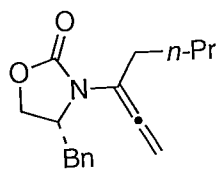

5a

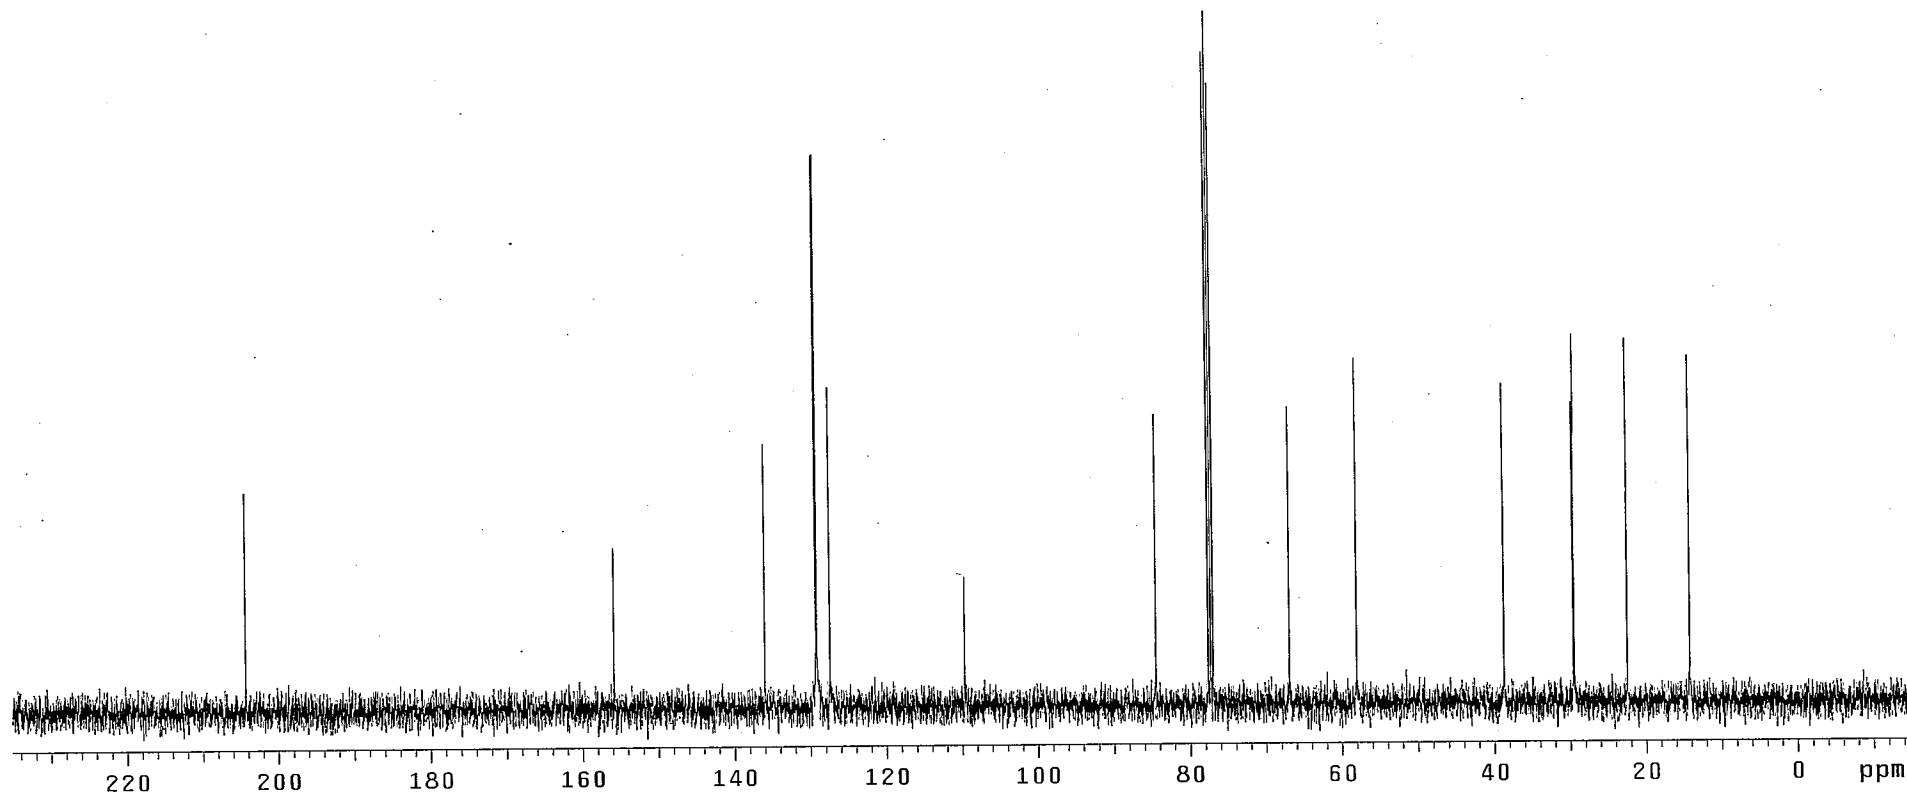

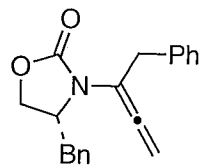

5b

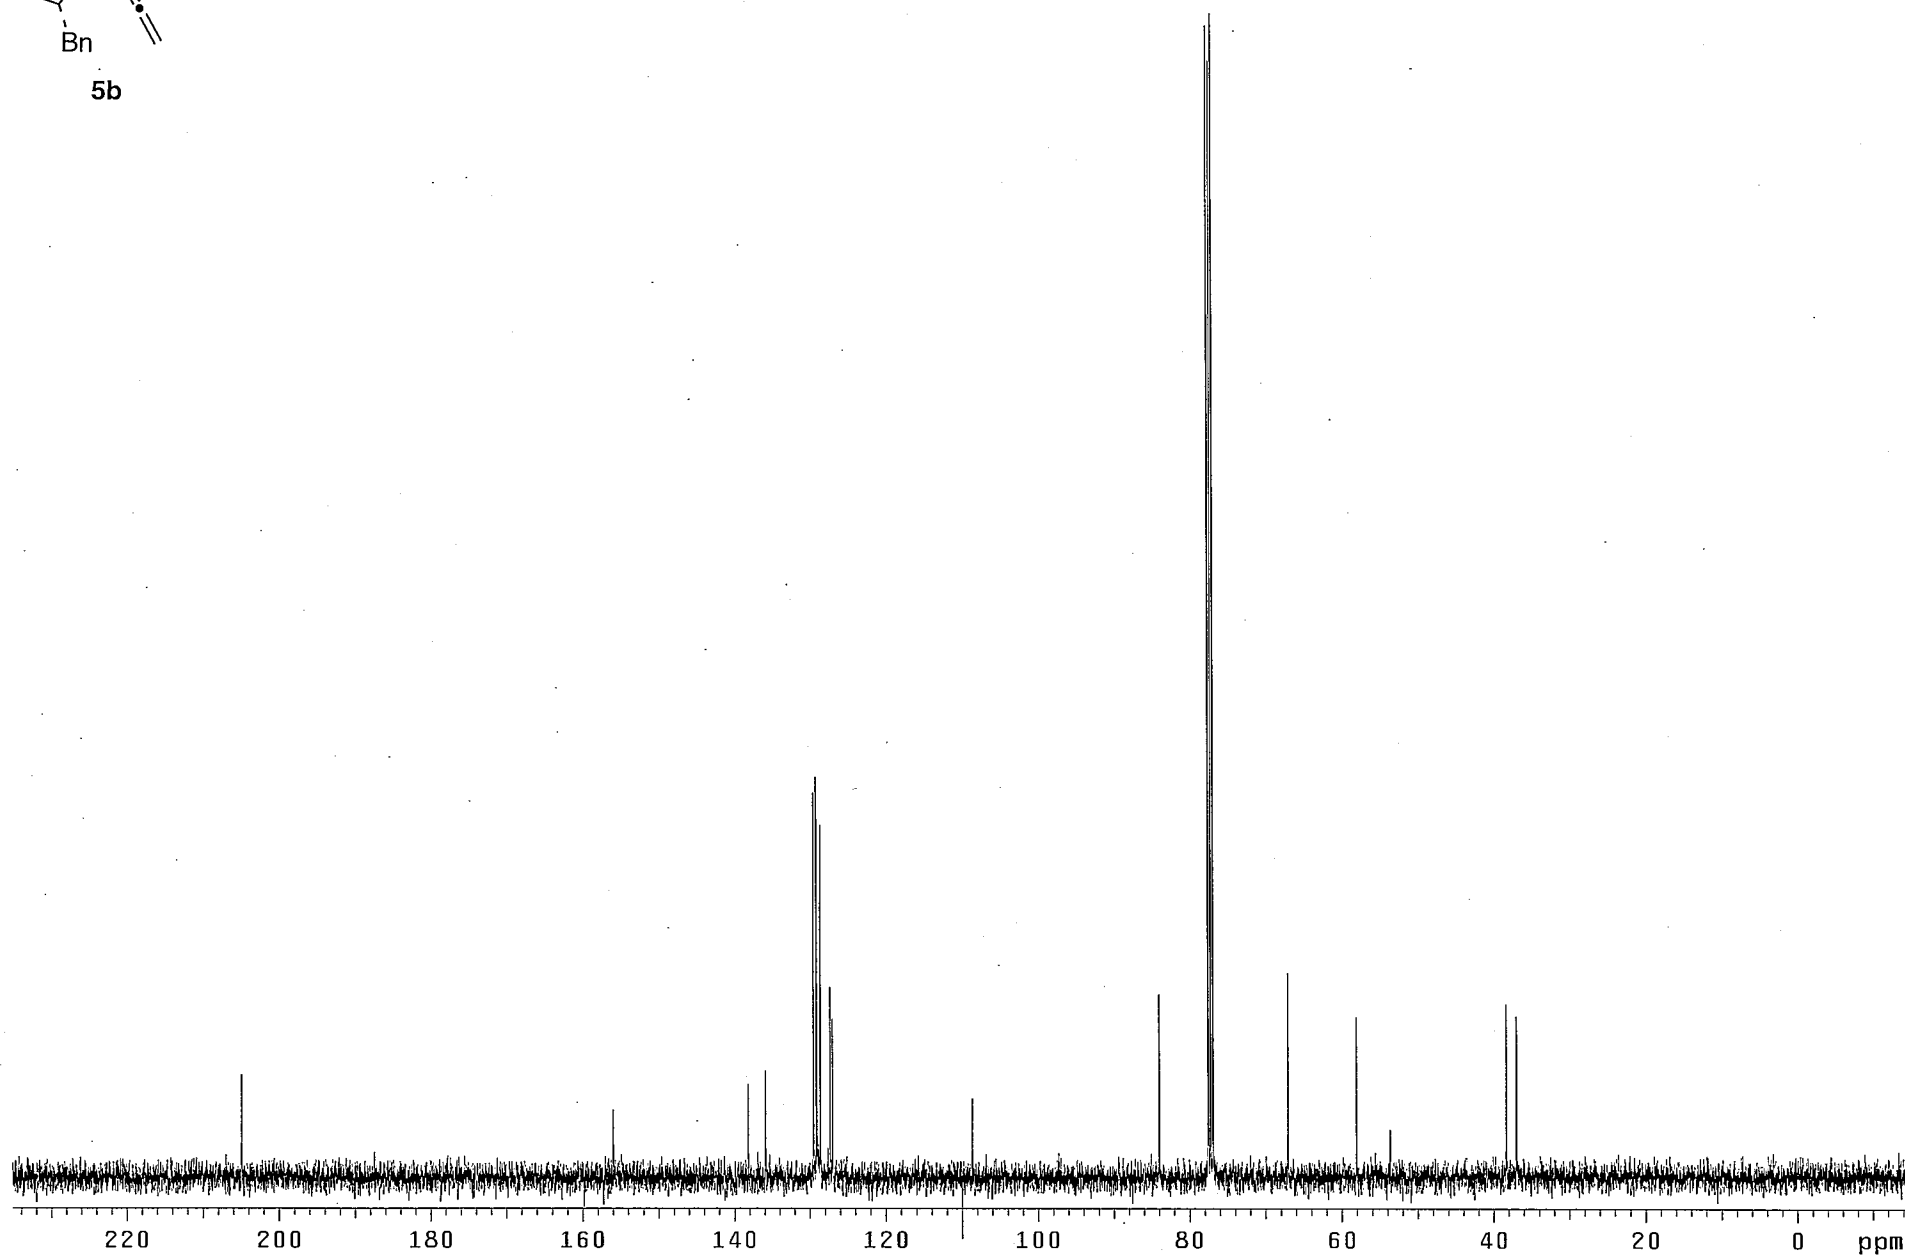

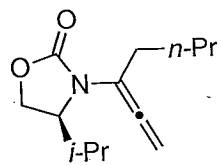

7a

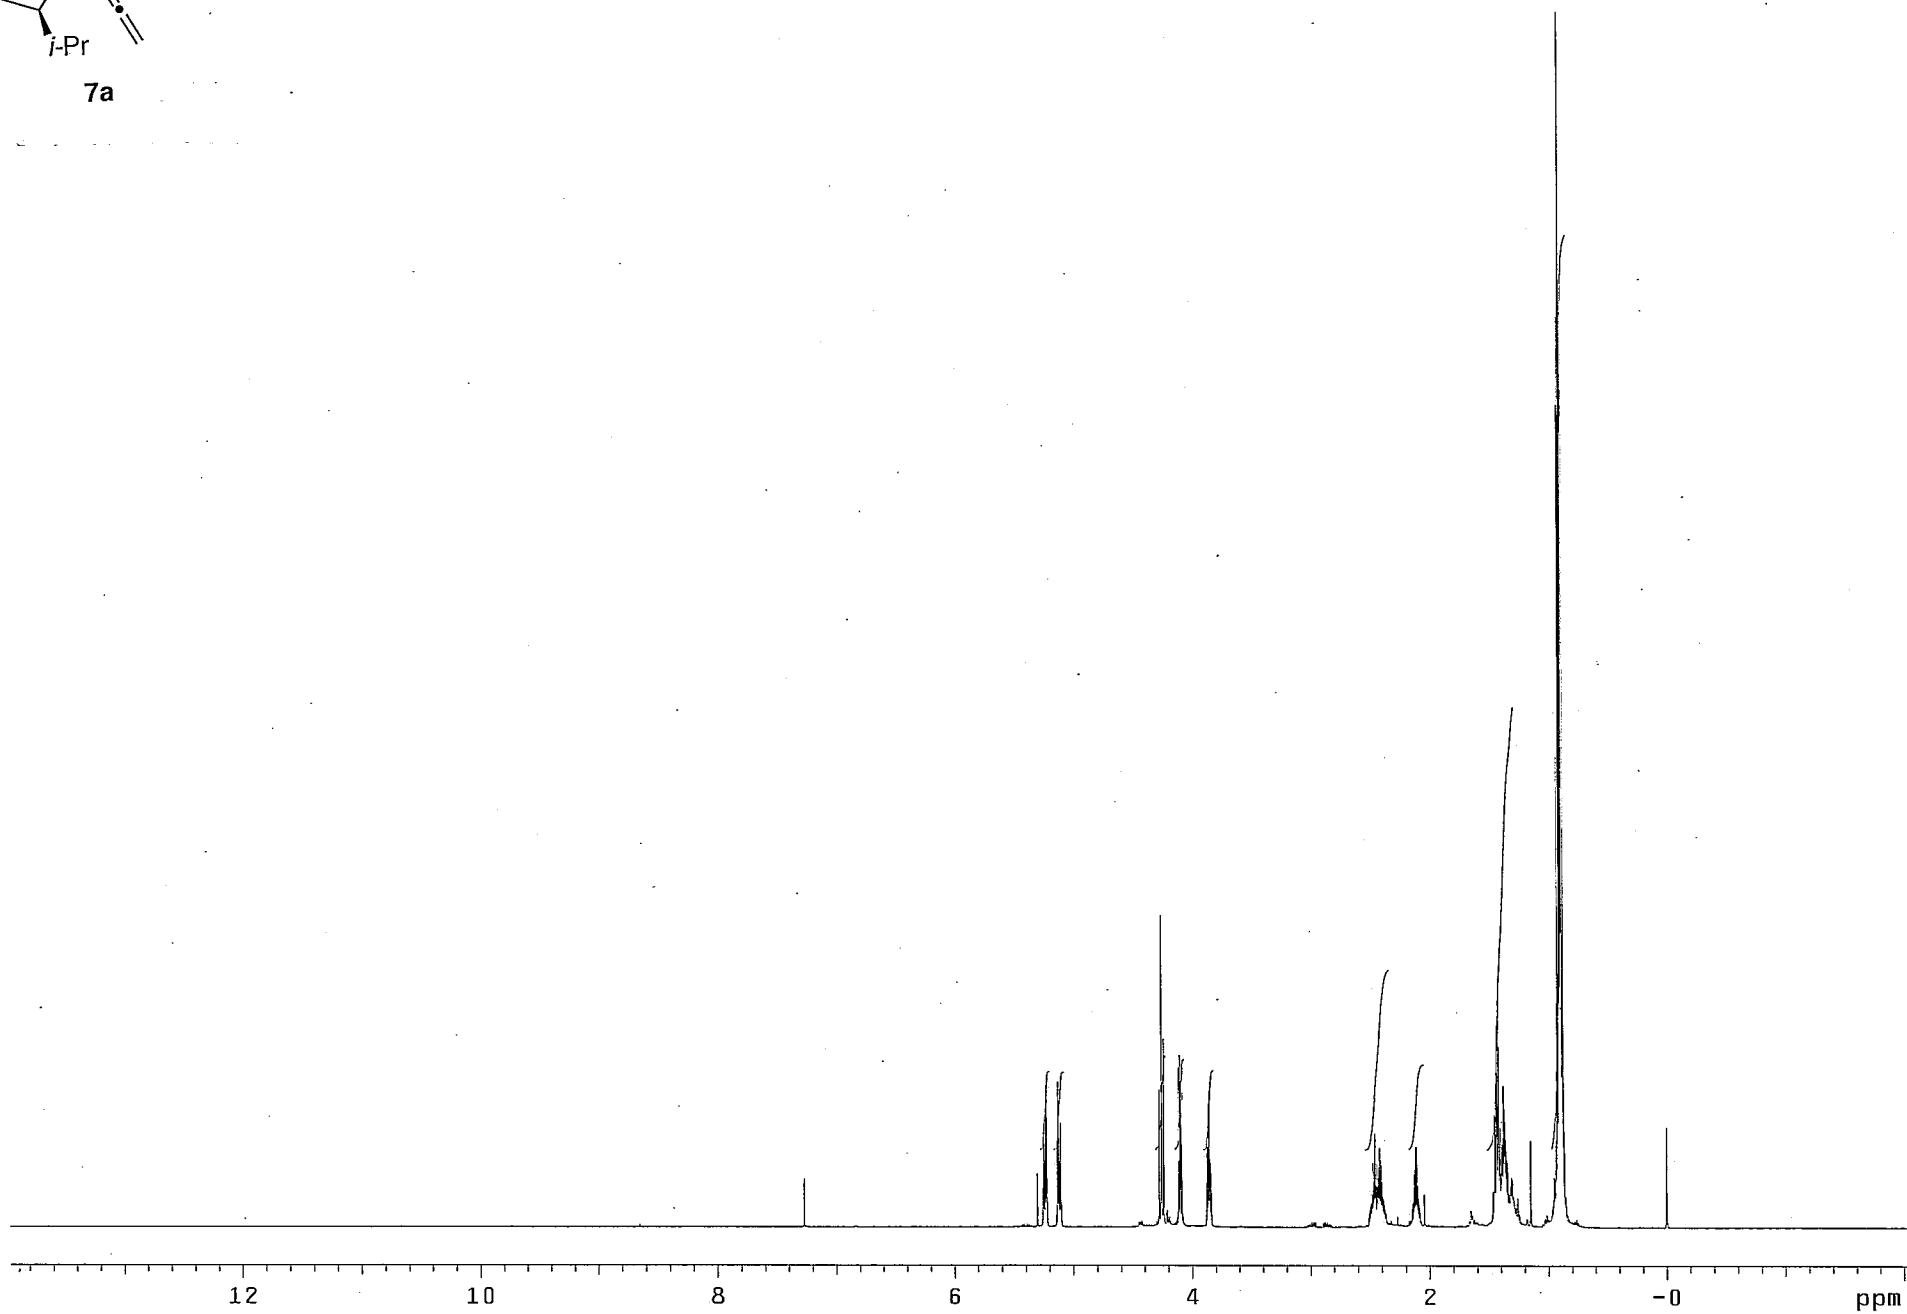

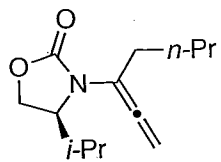

7a

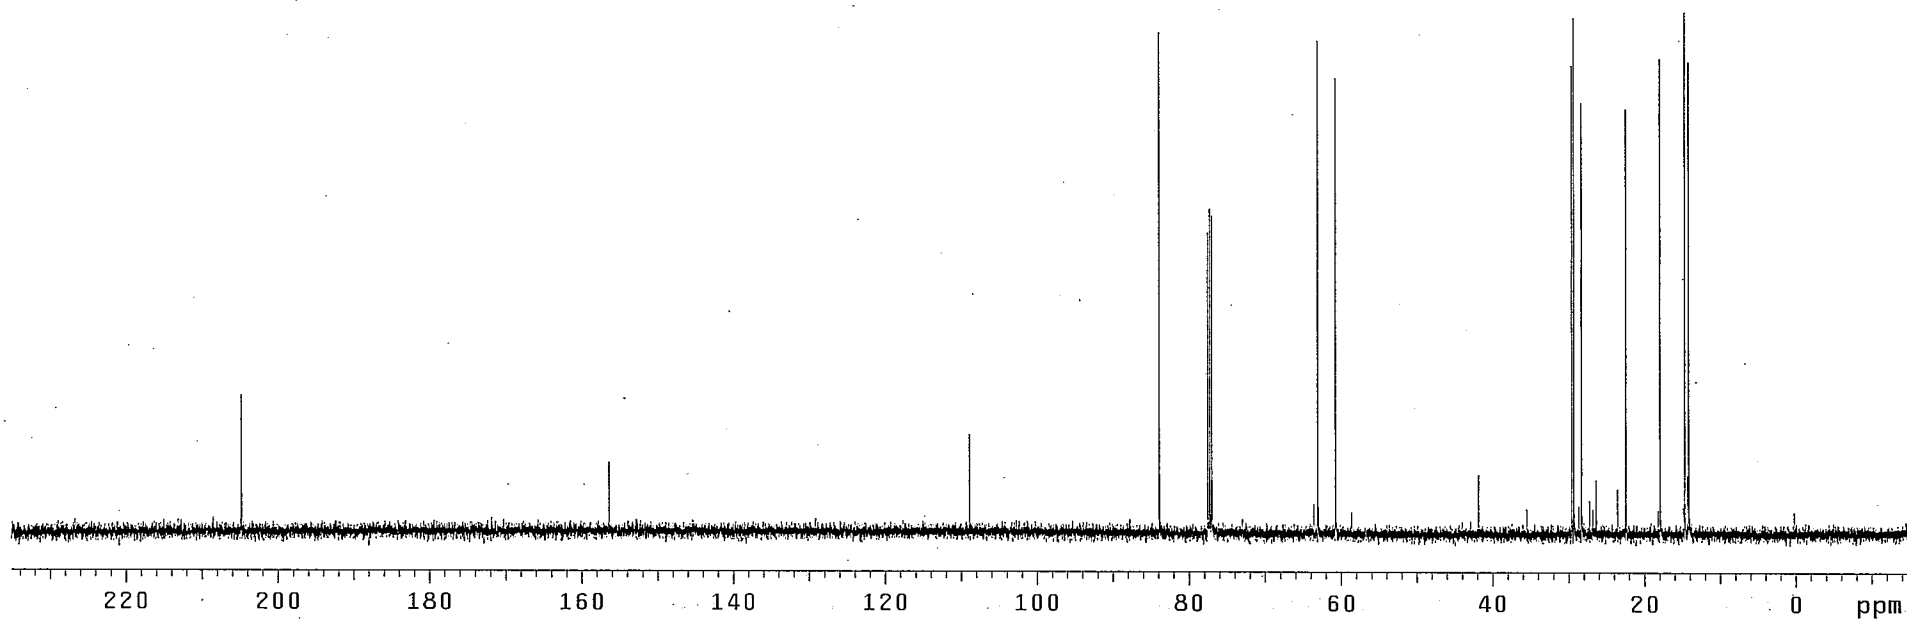

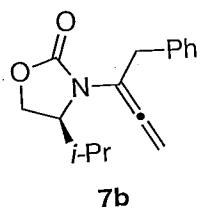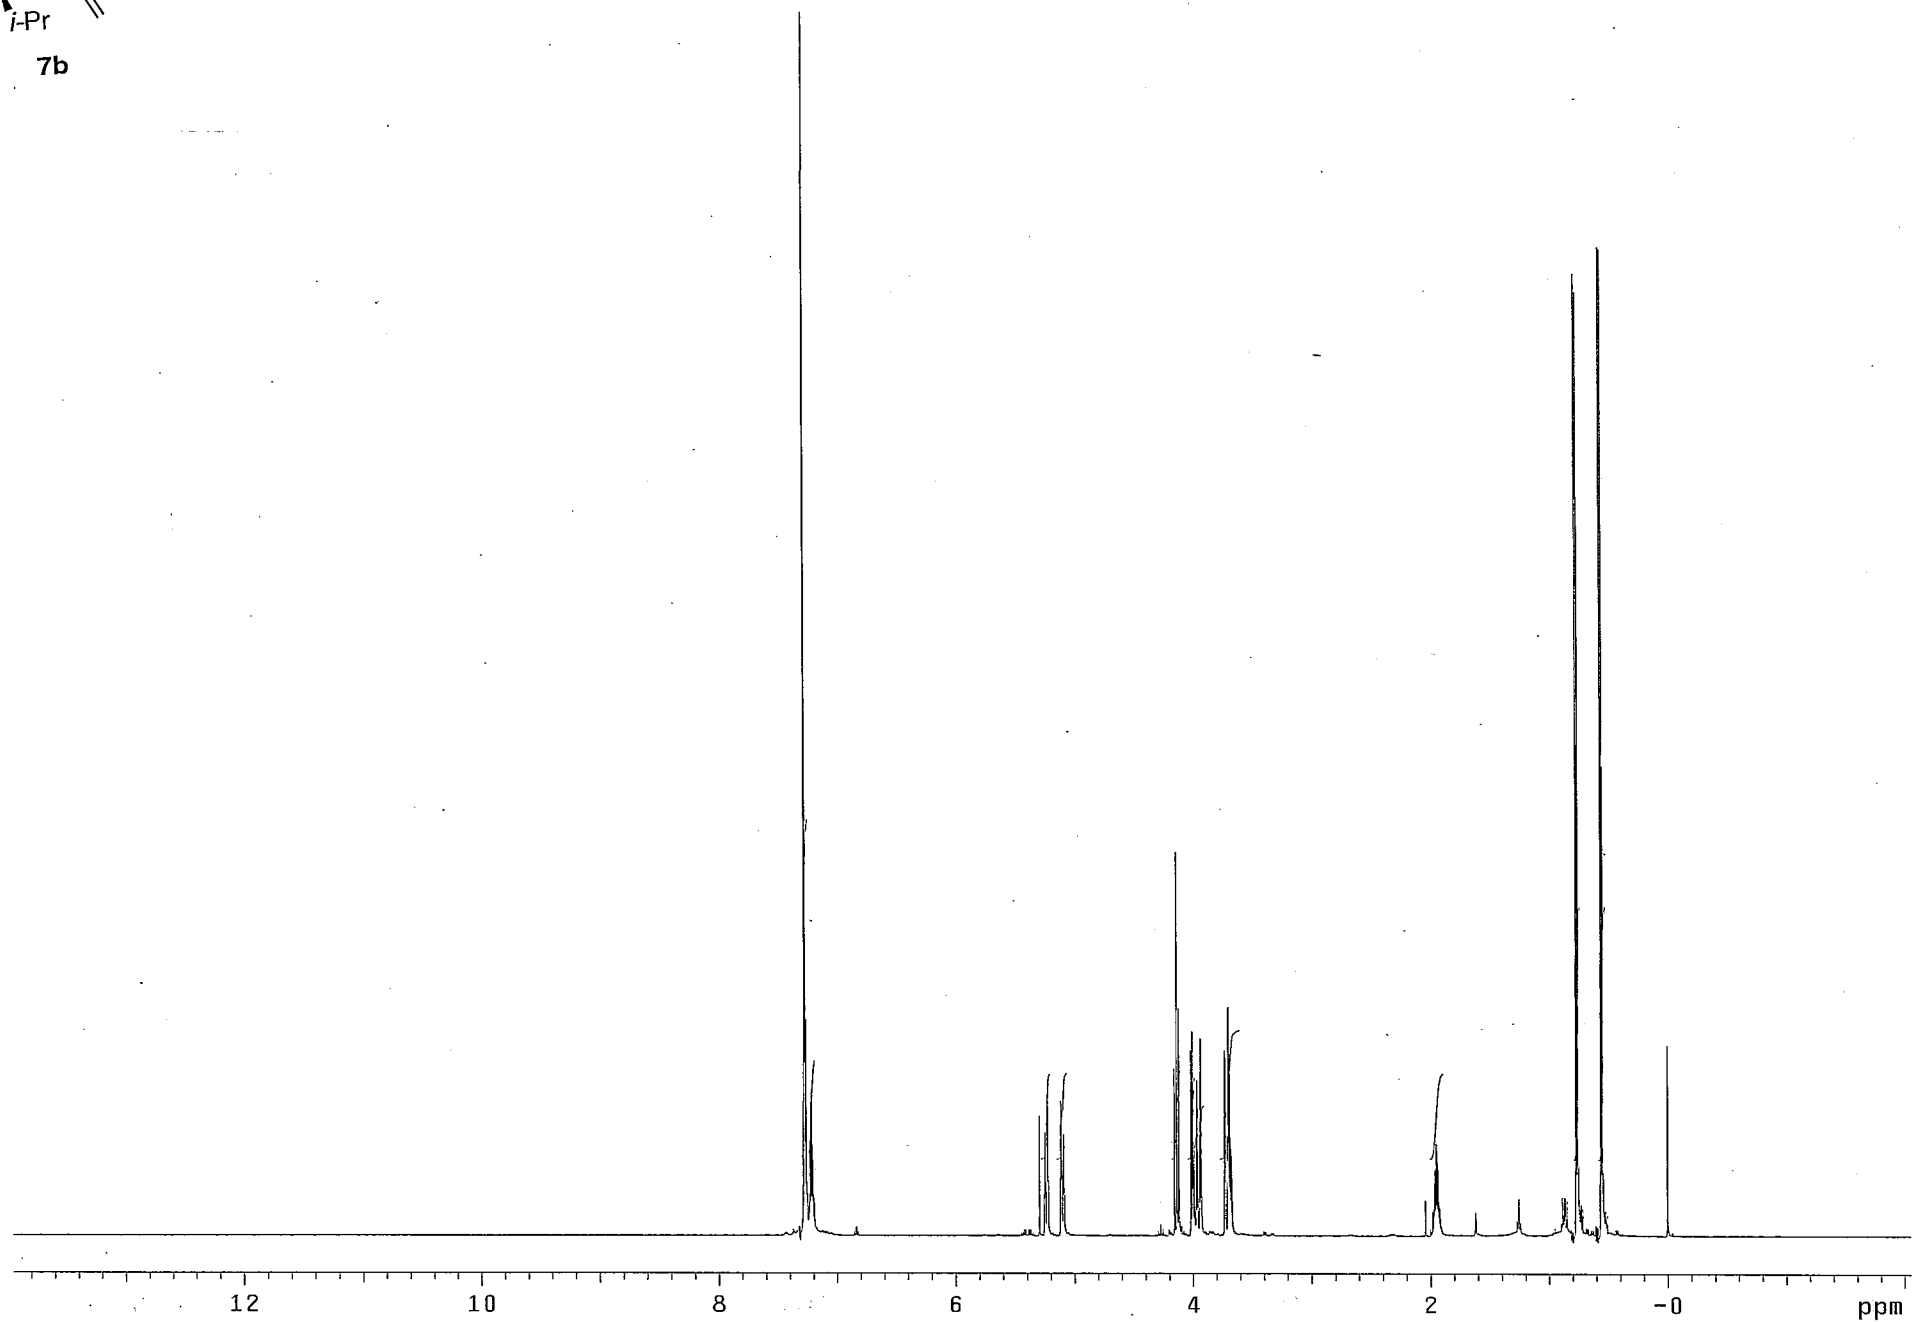

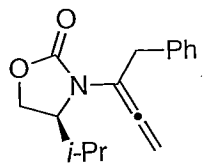

7b

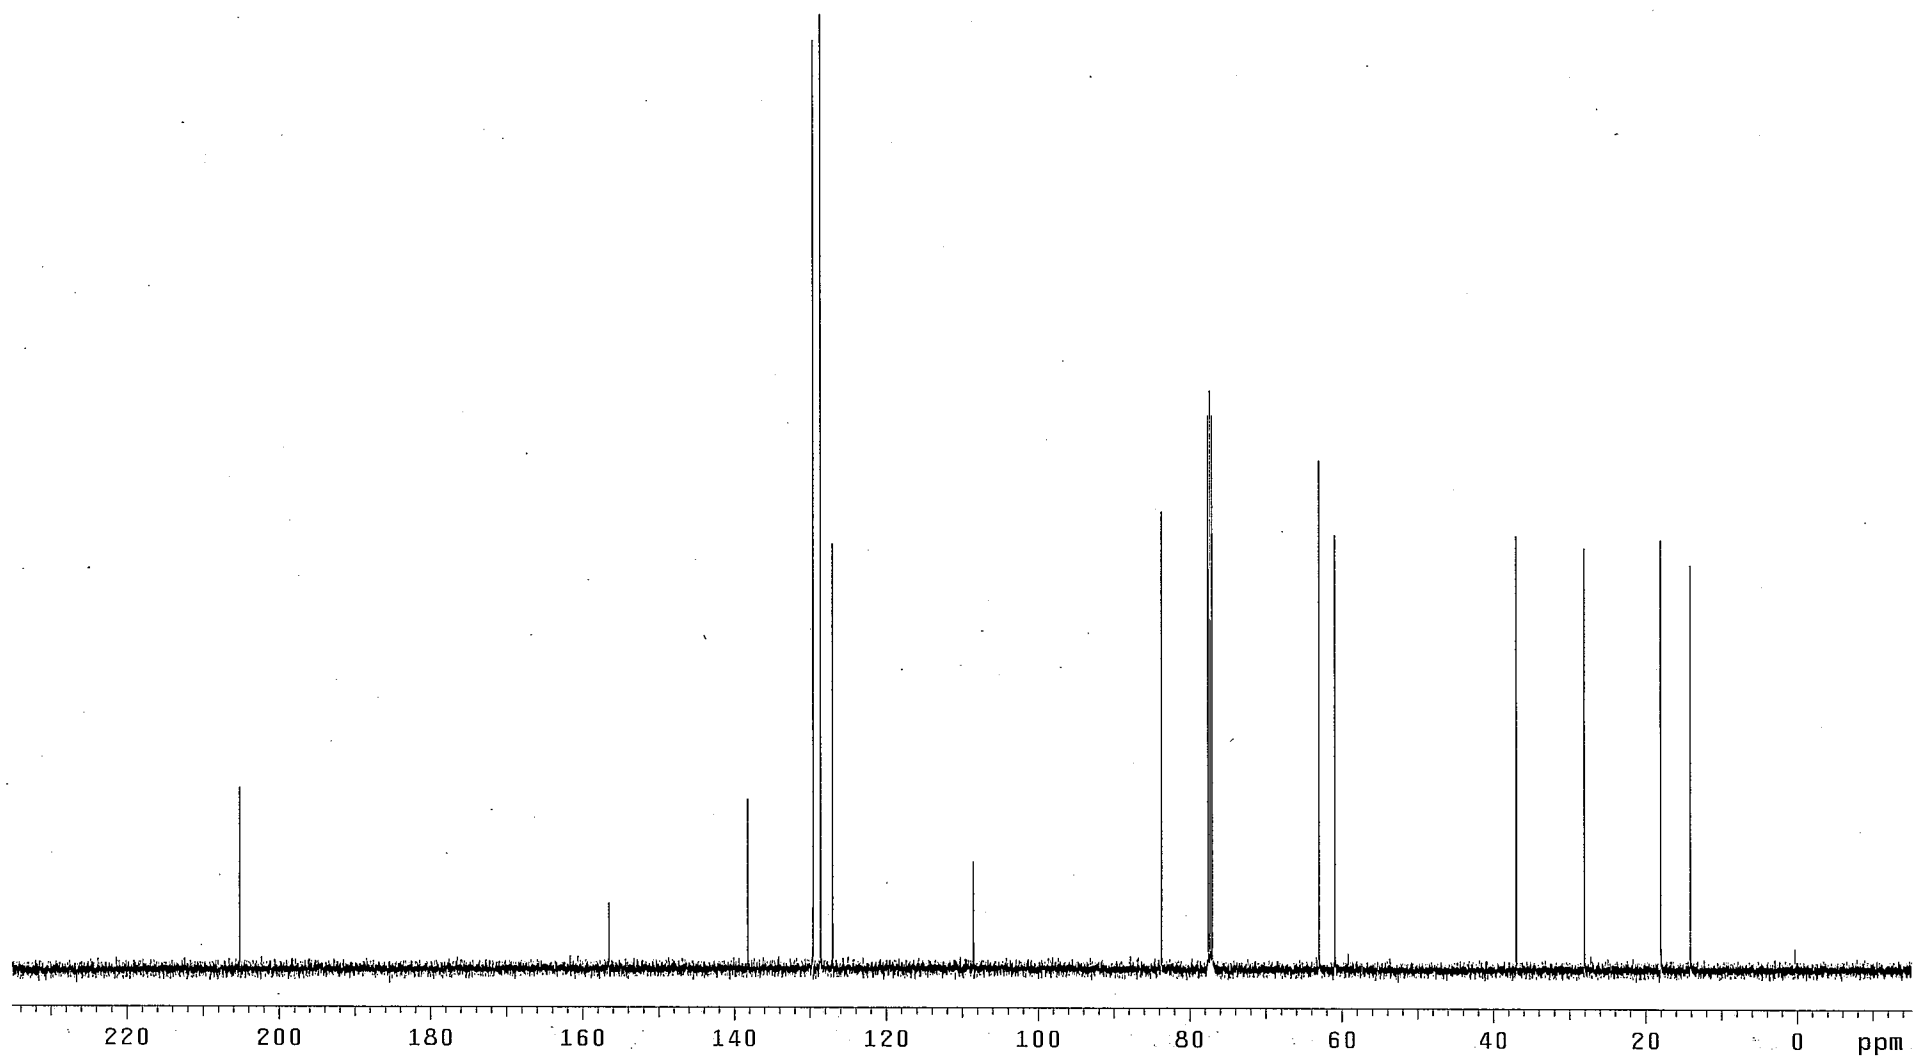



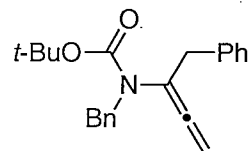

11

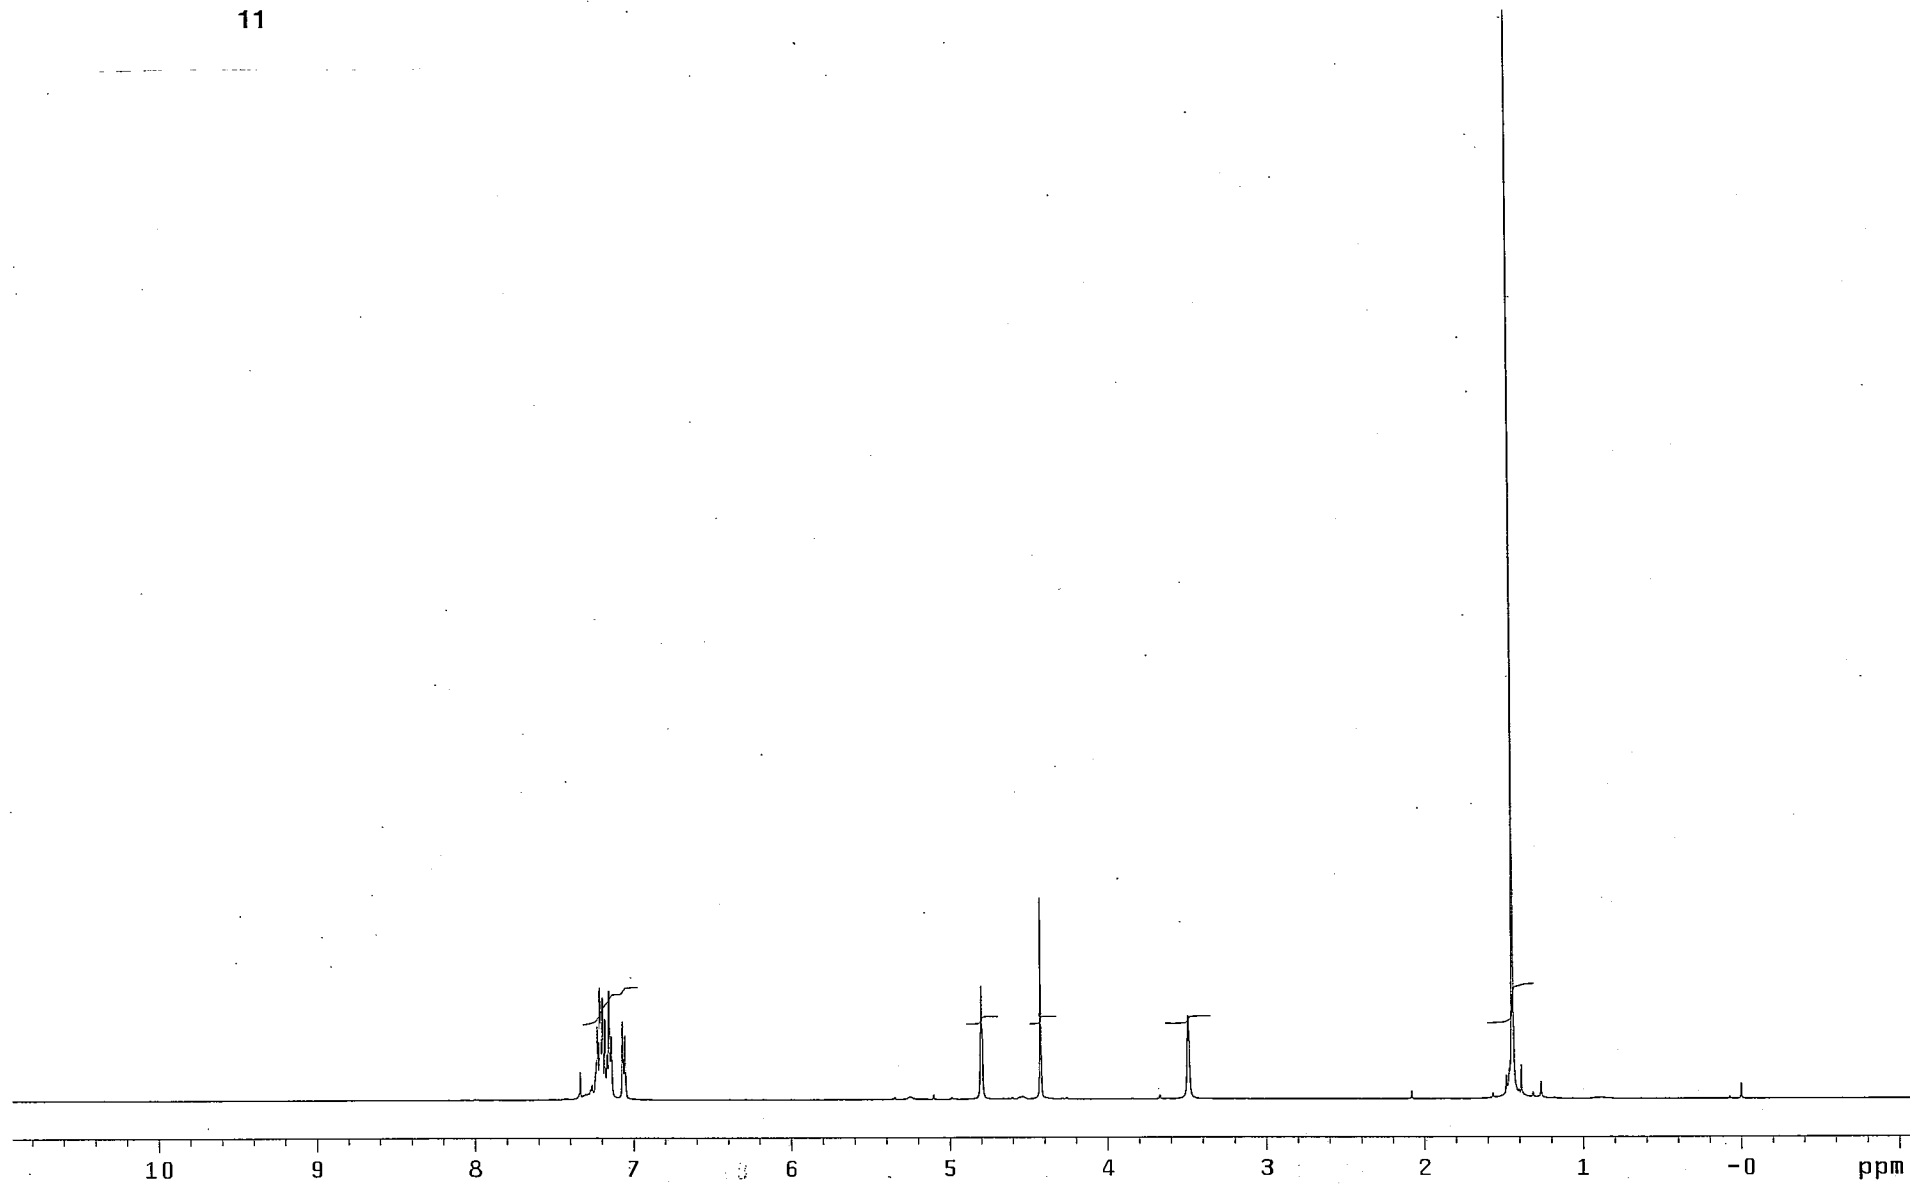

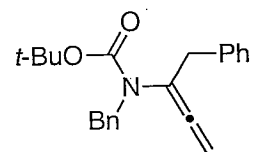

11

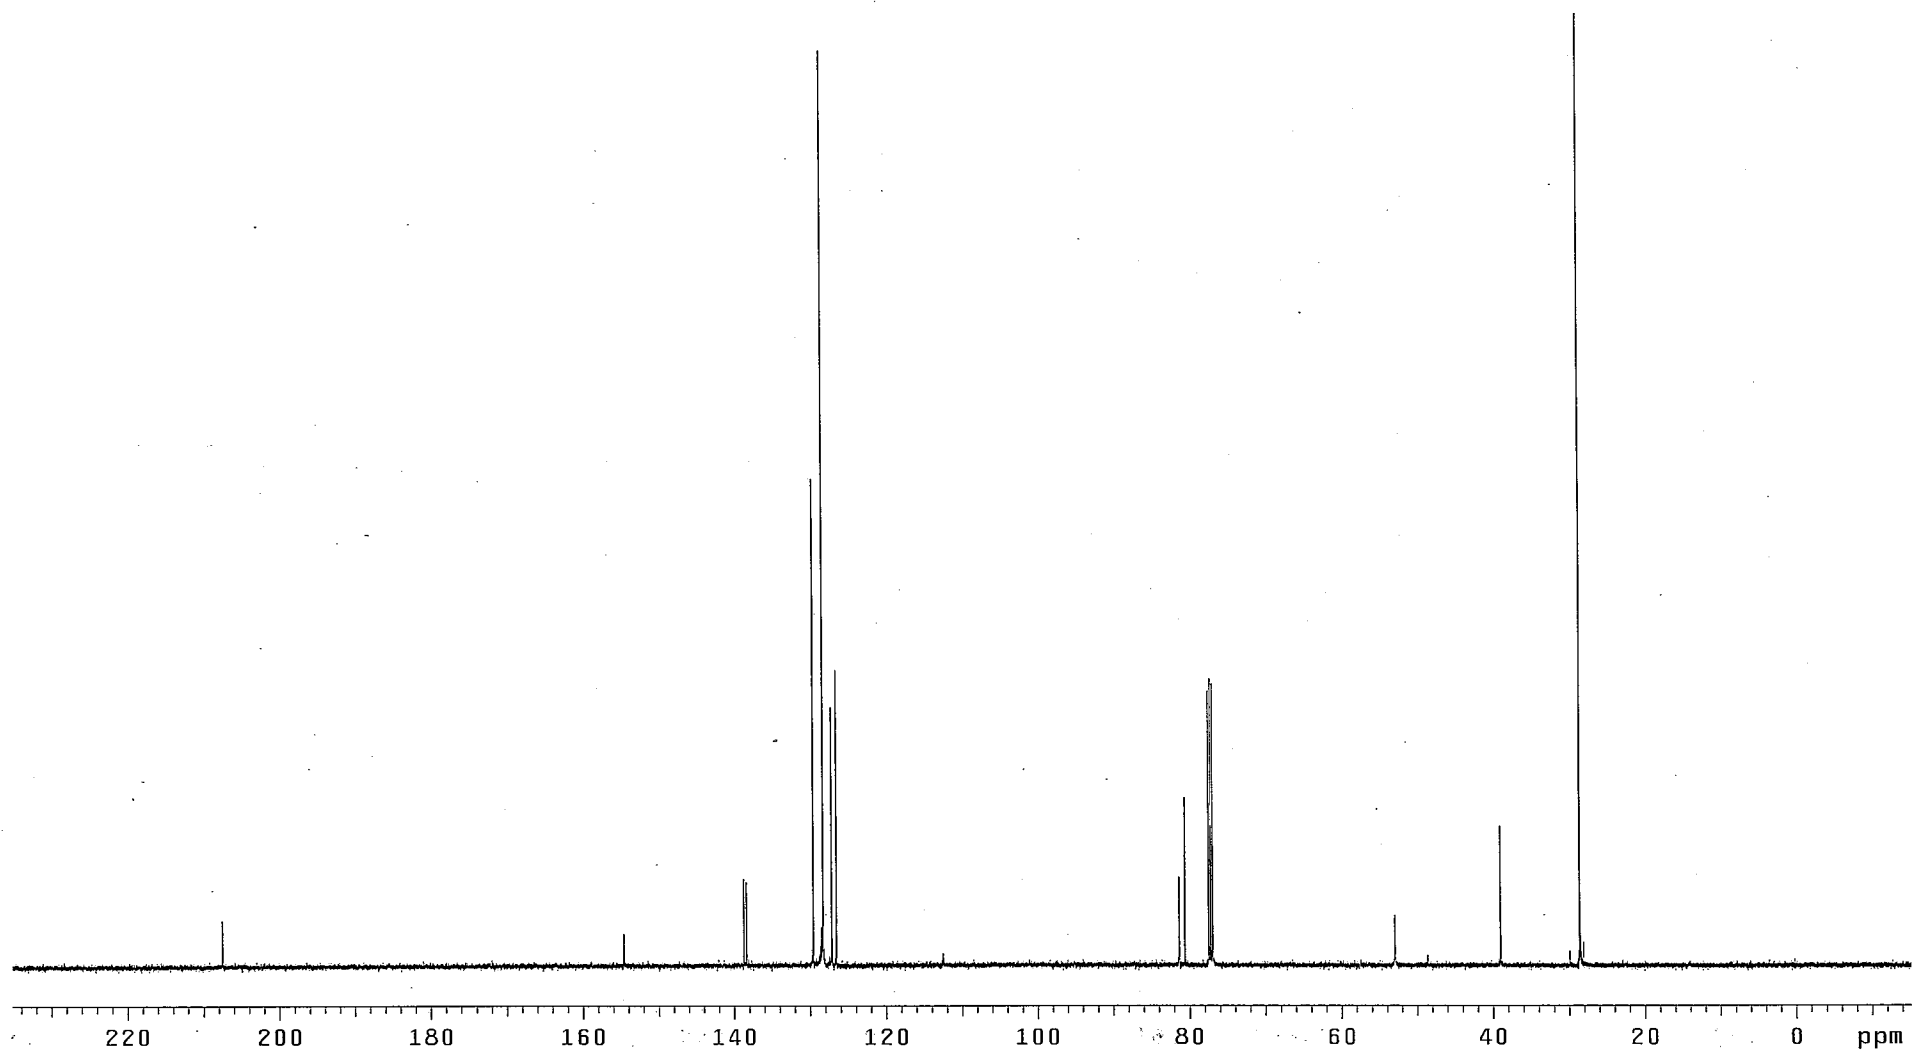

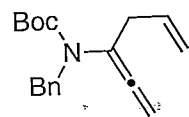

13

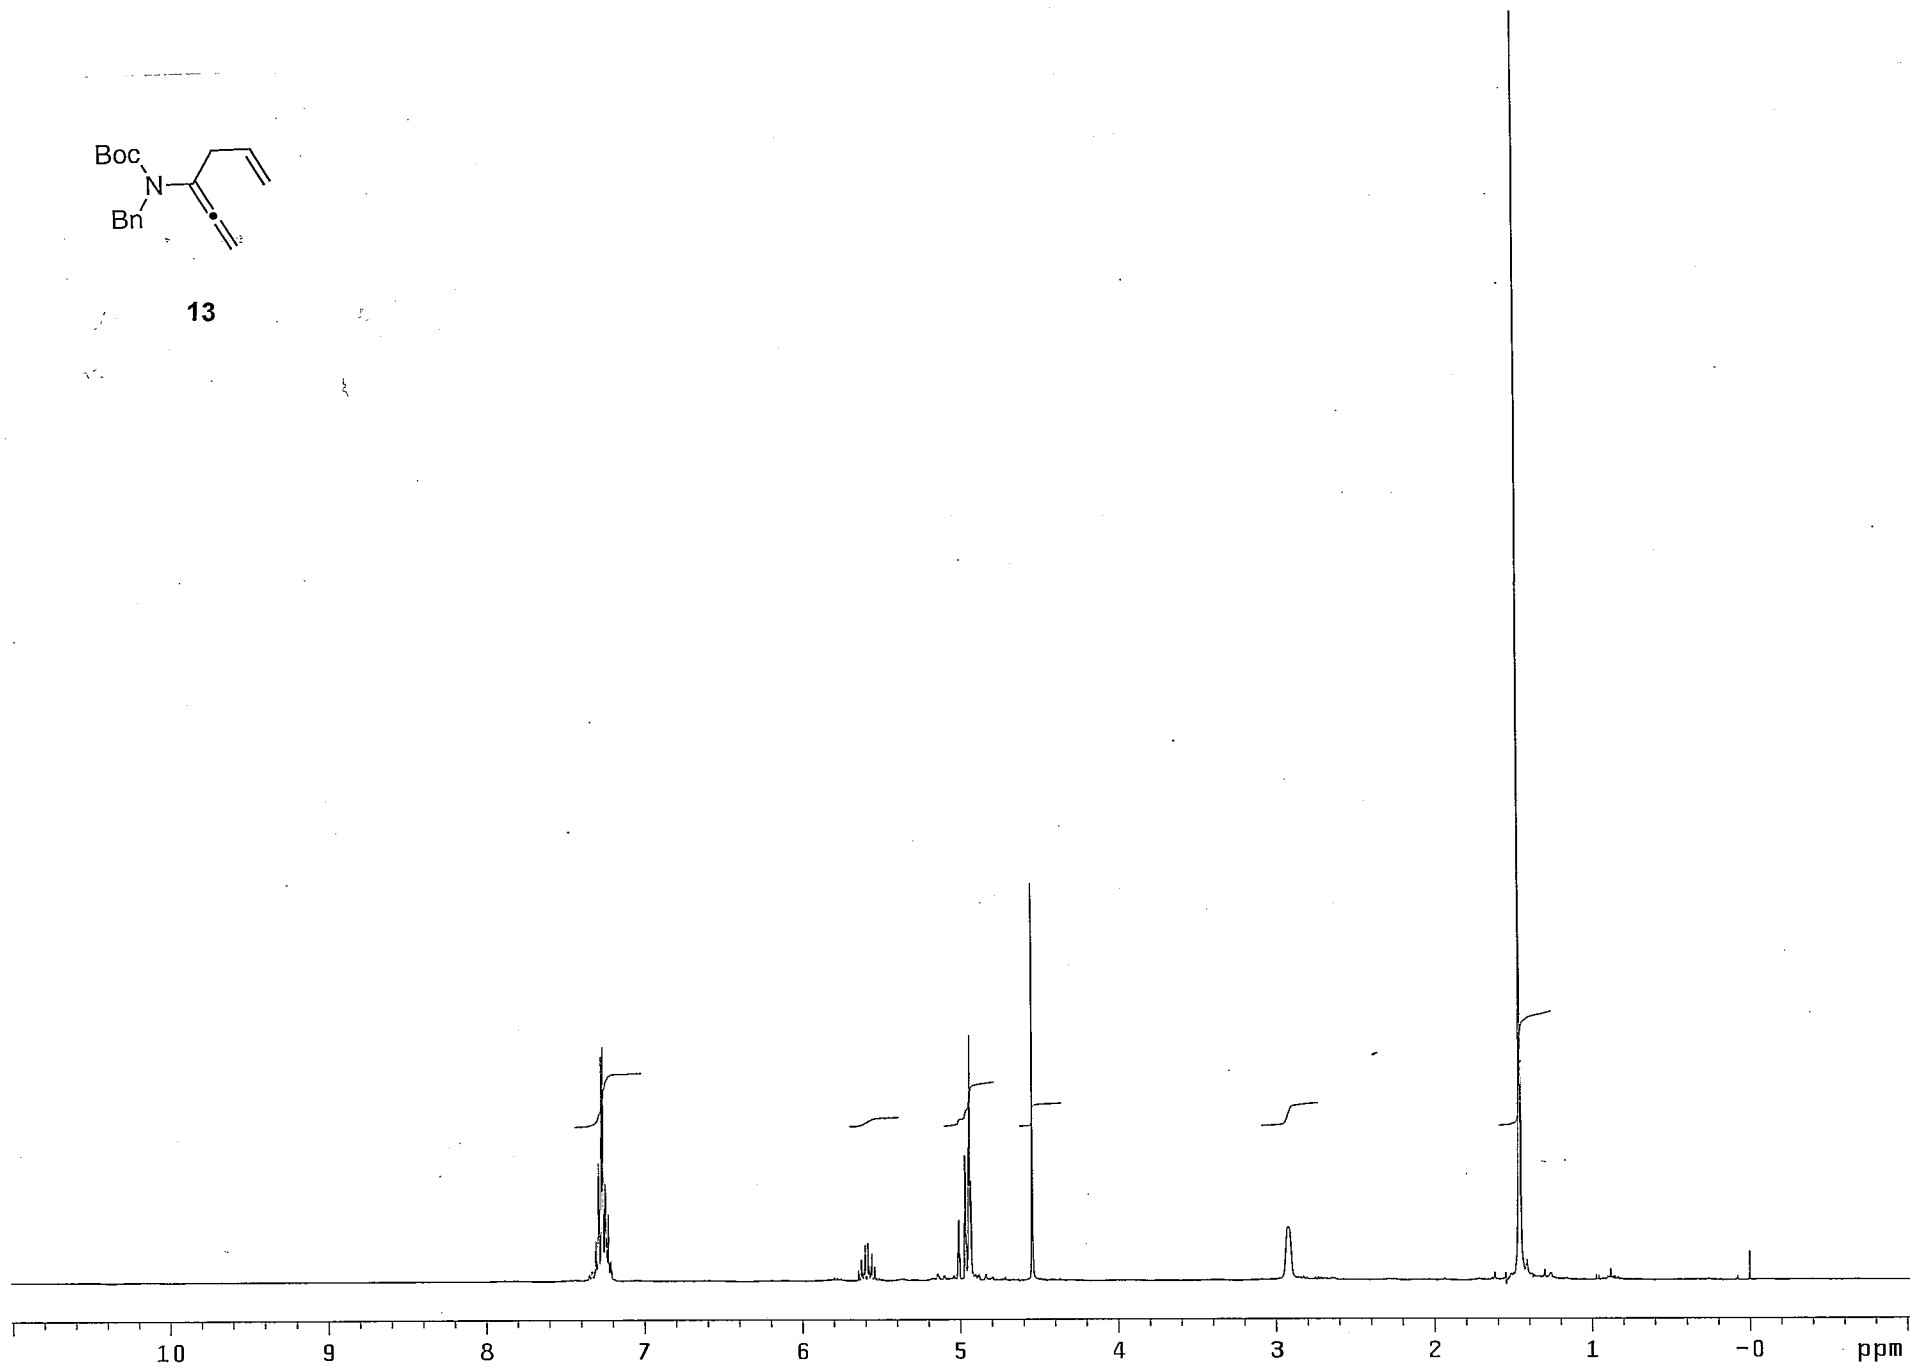

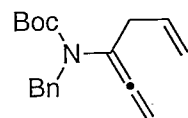

13

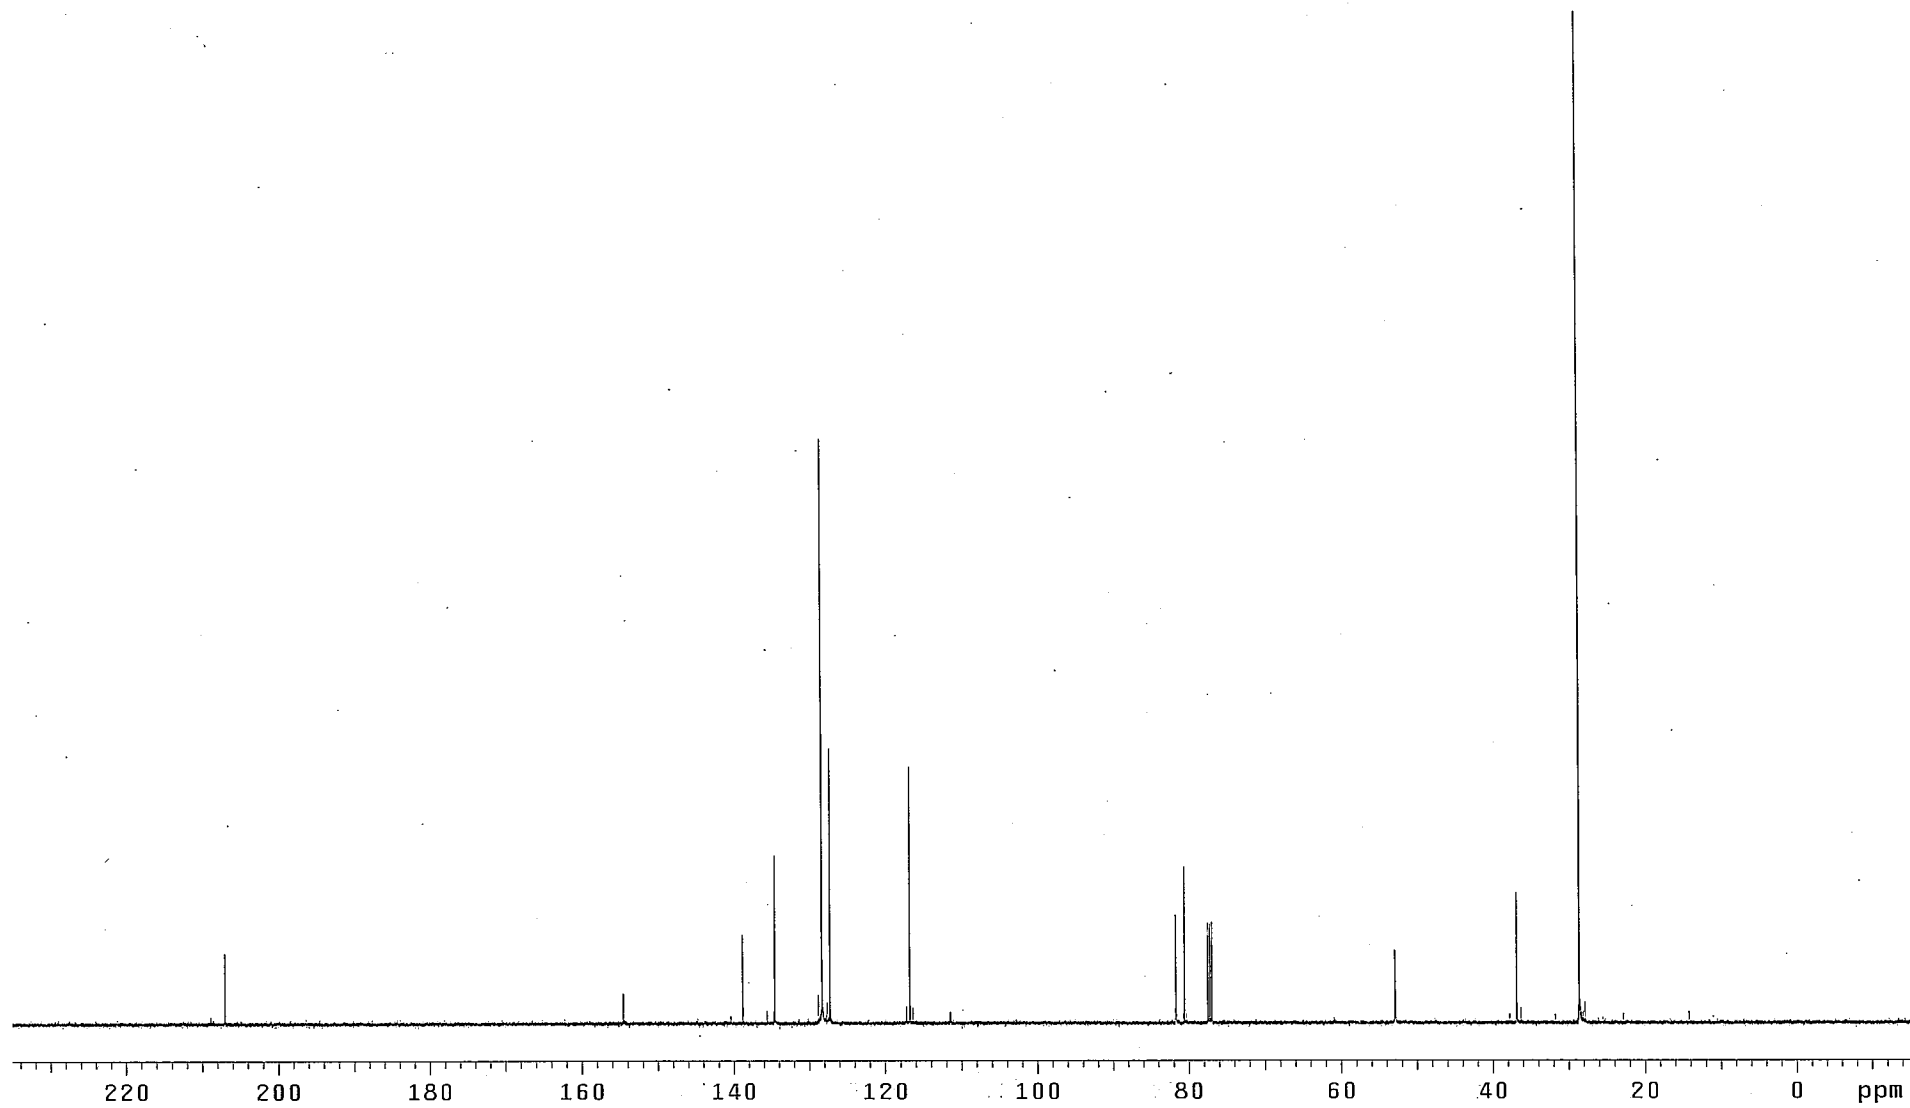

S49

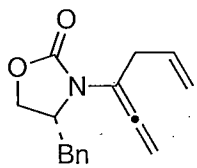

15a

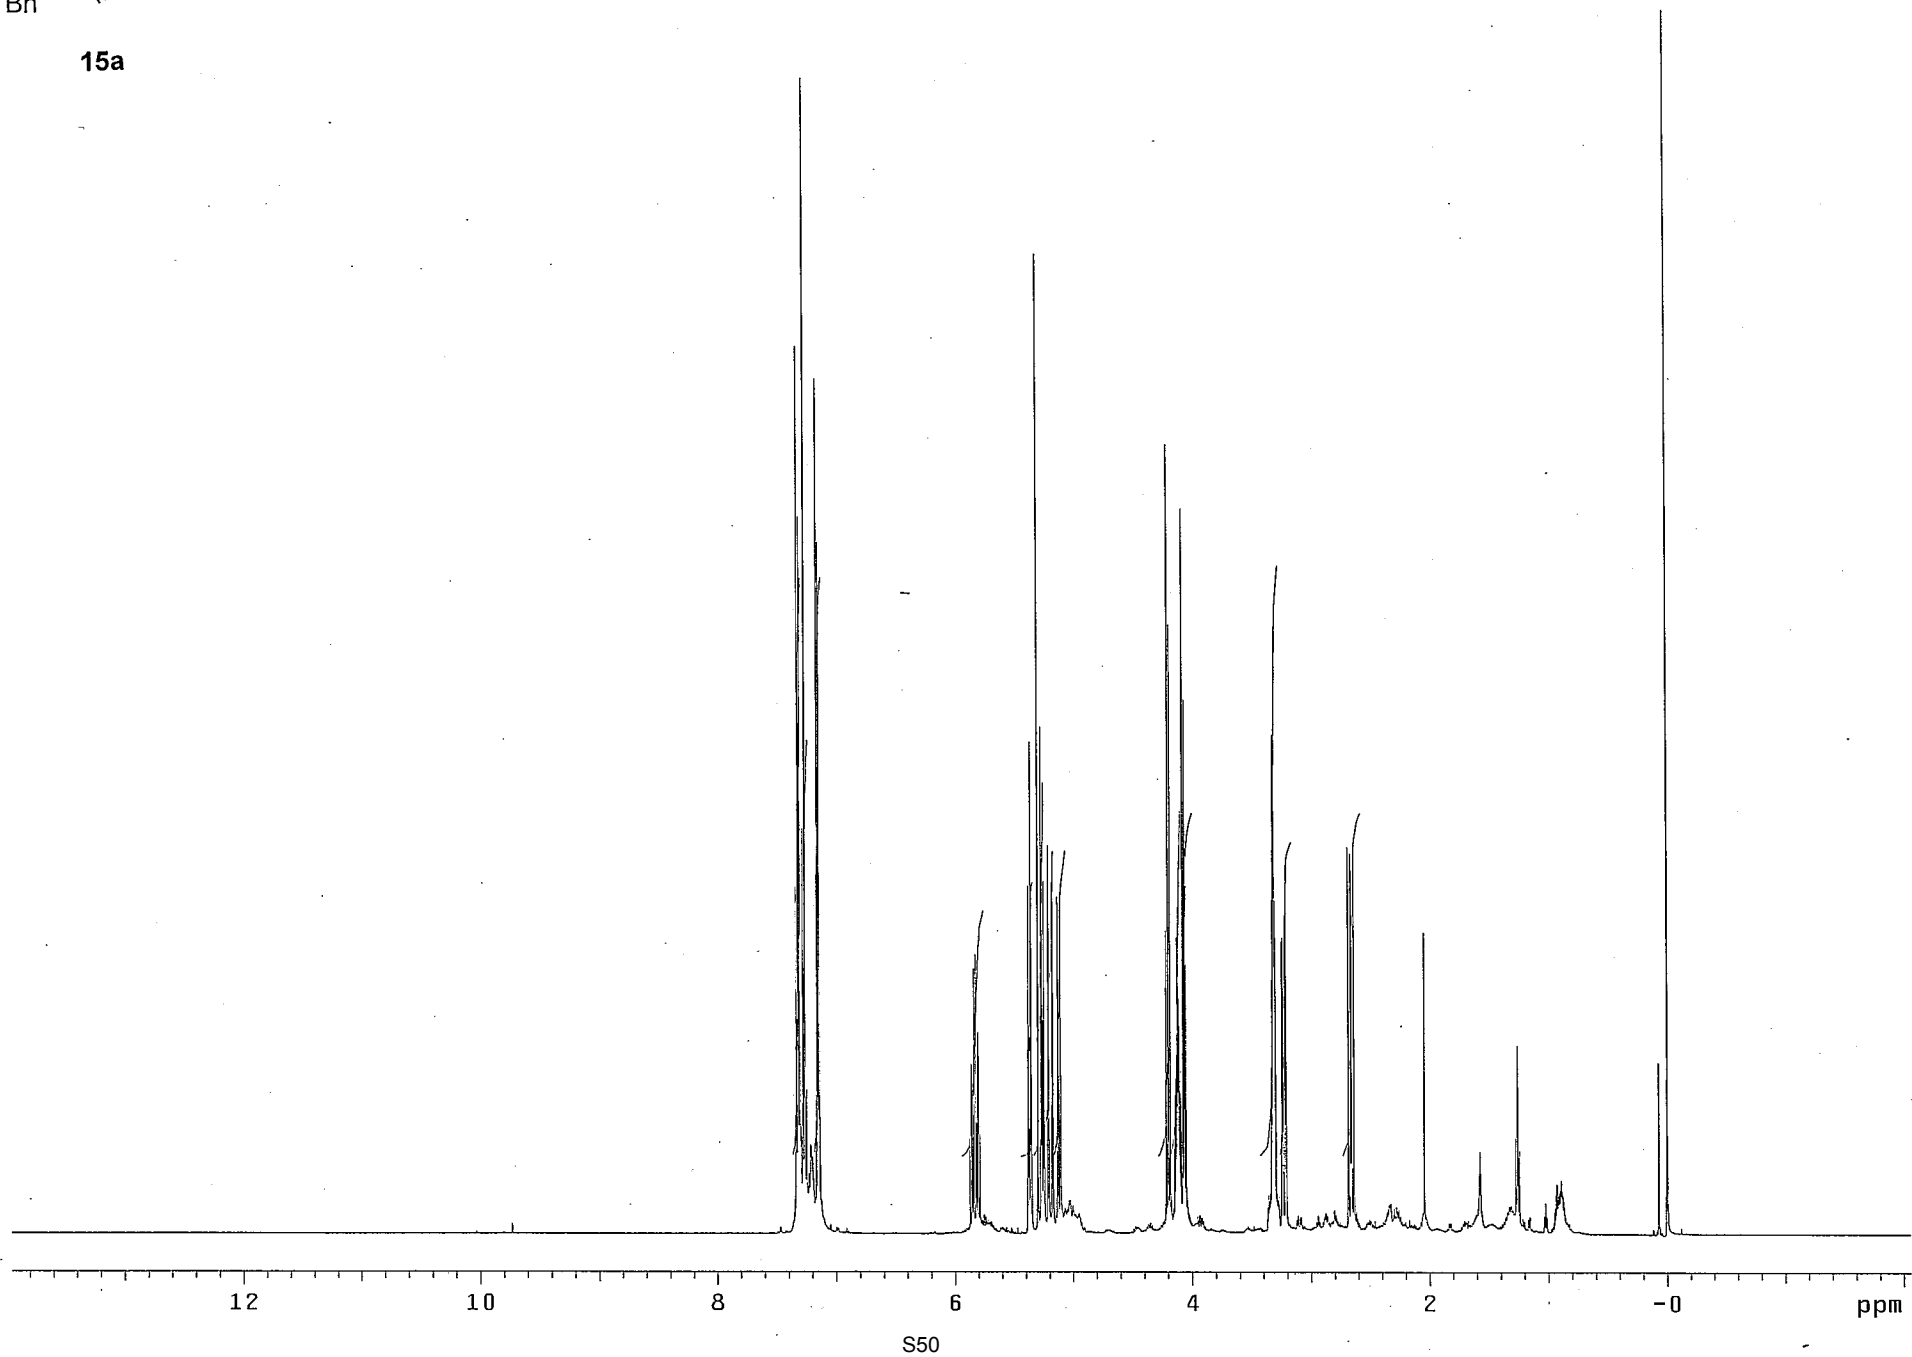

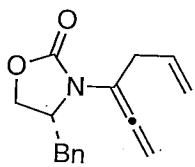

15a

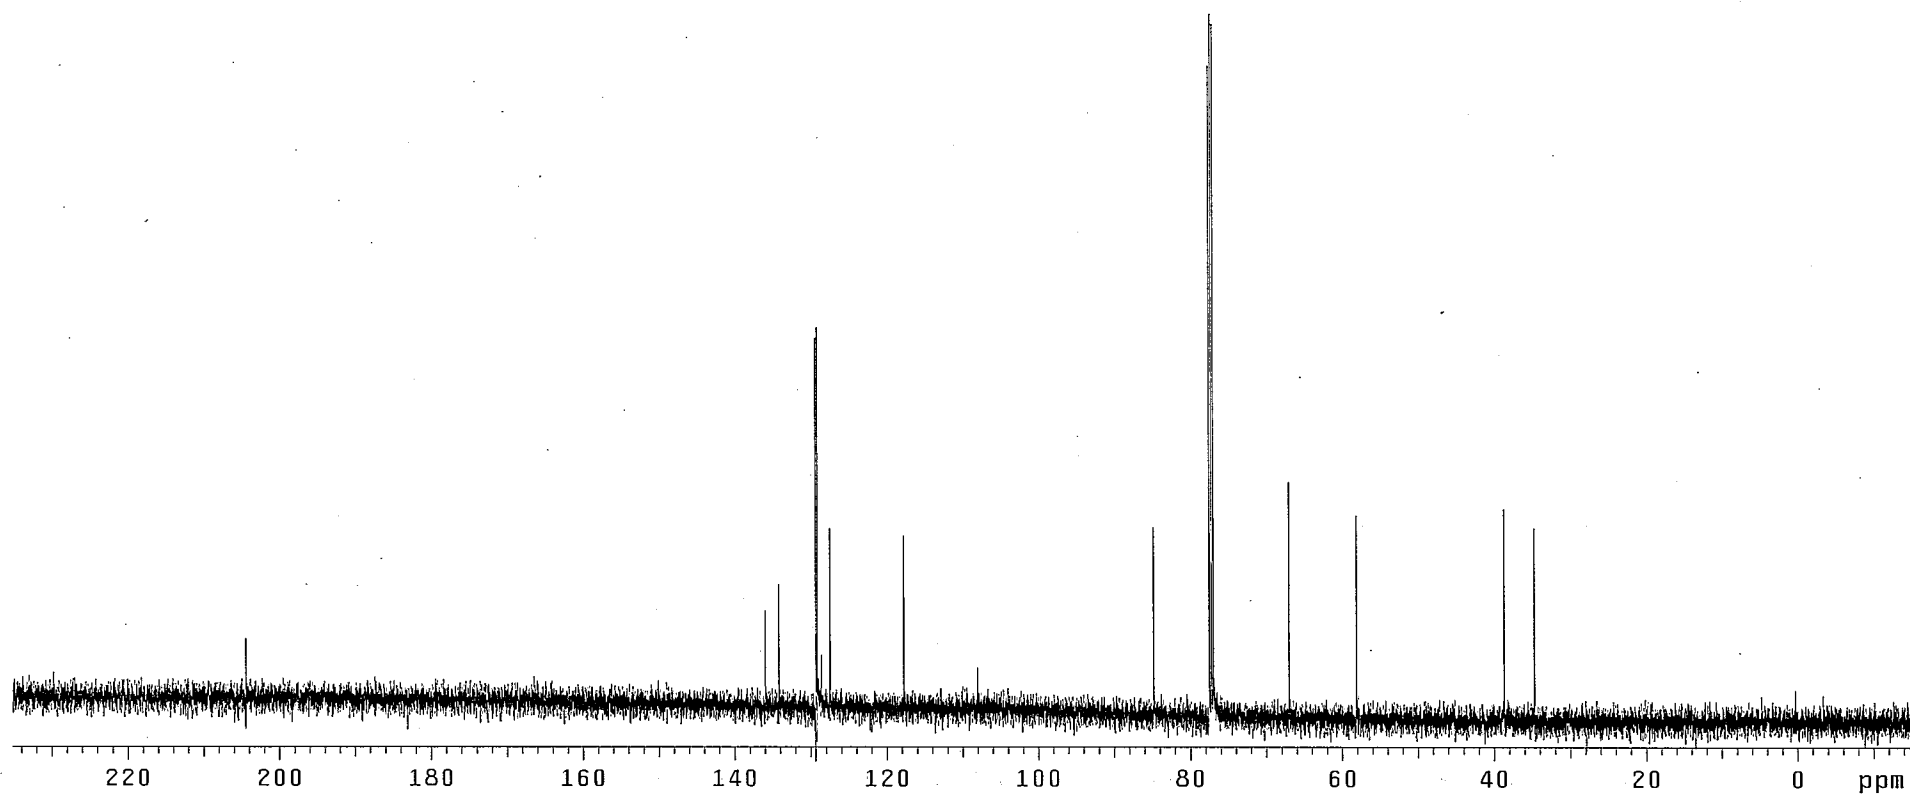

S51

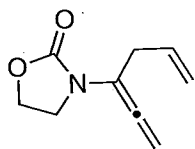

15b

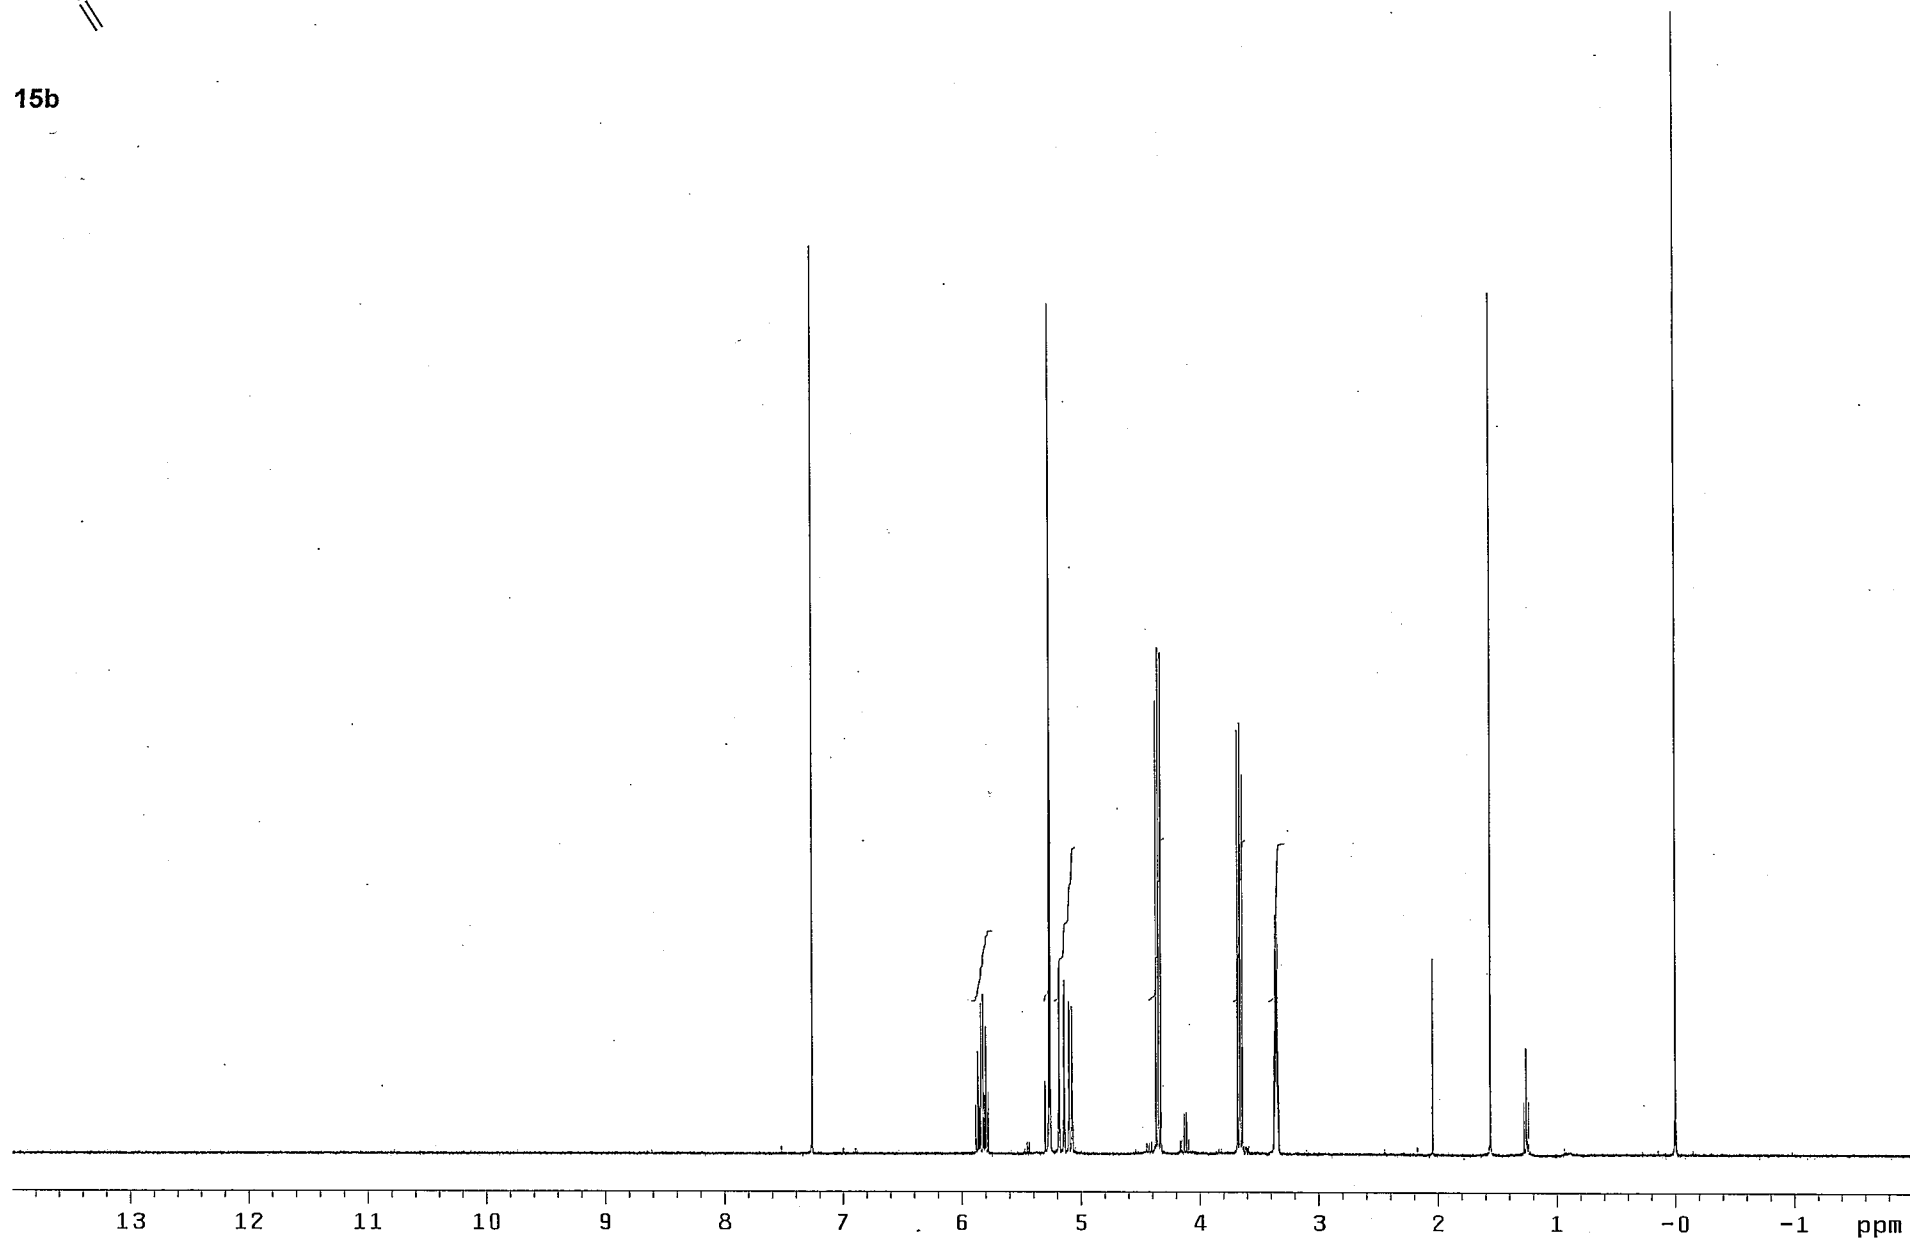

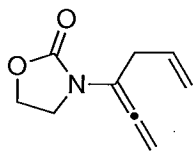

15b

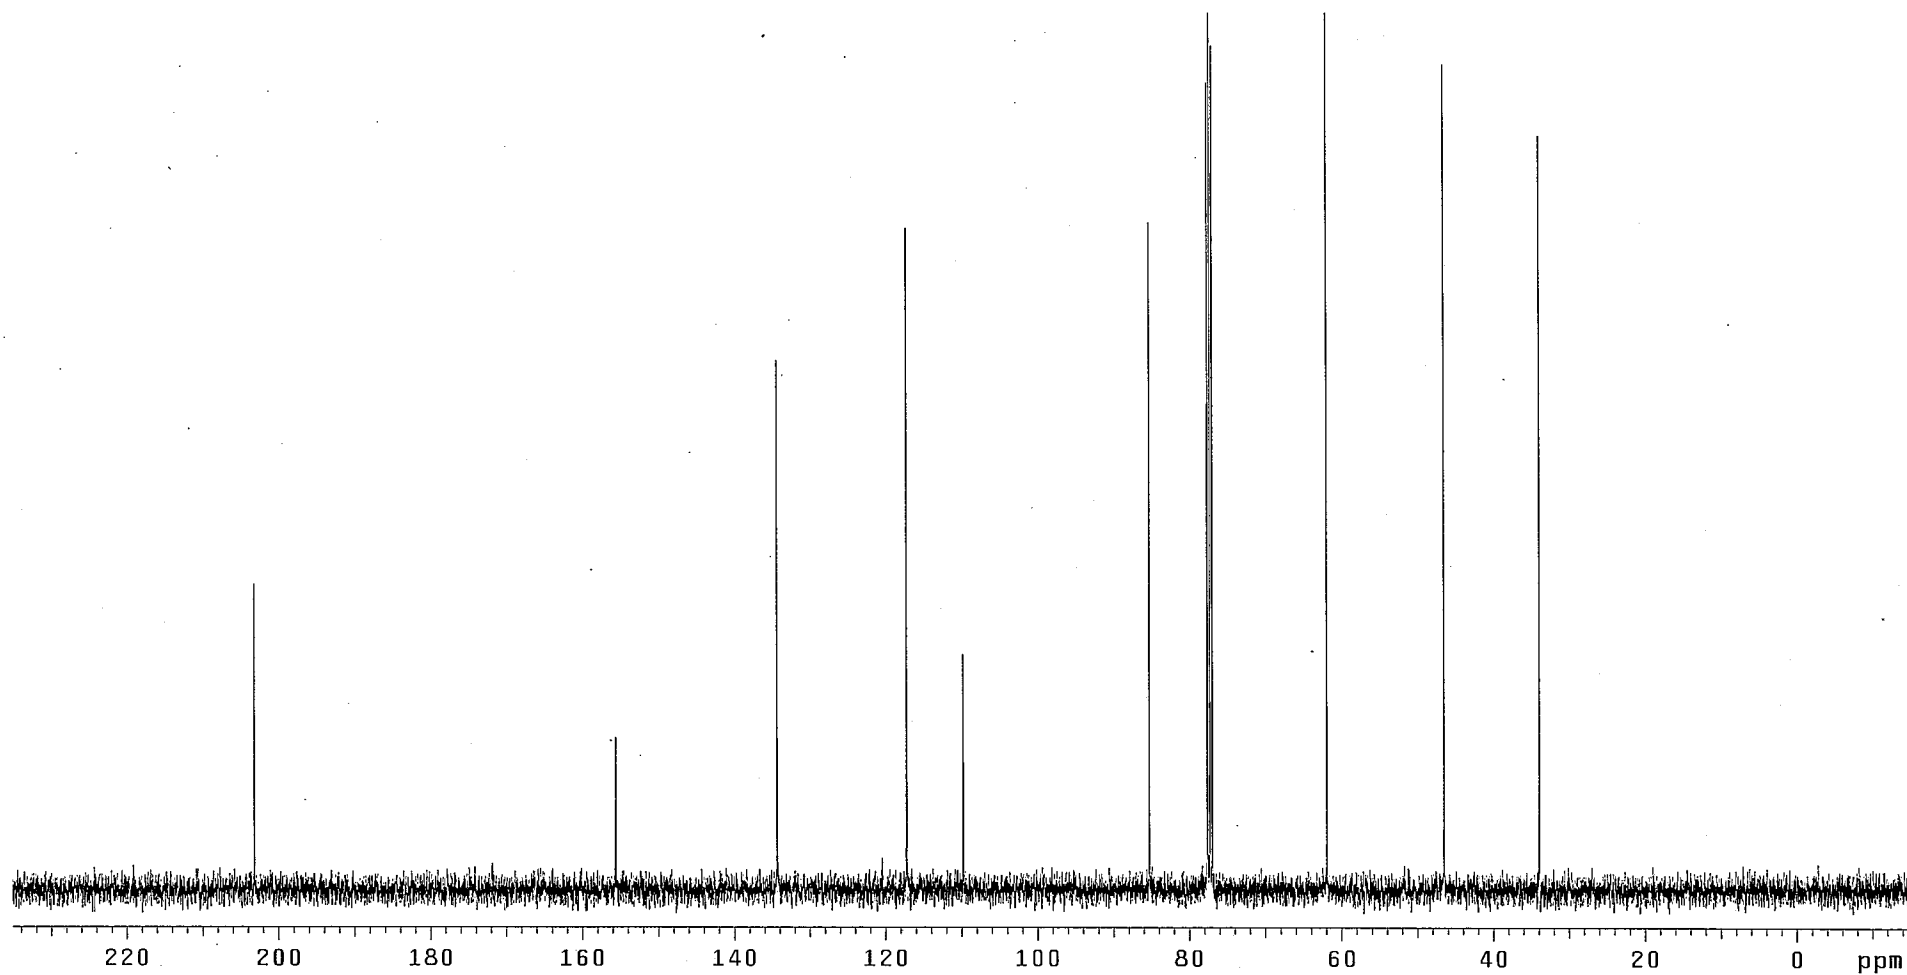



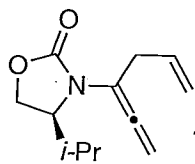

15c

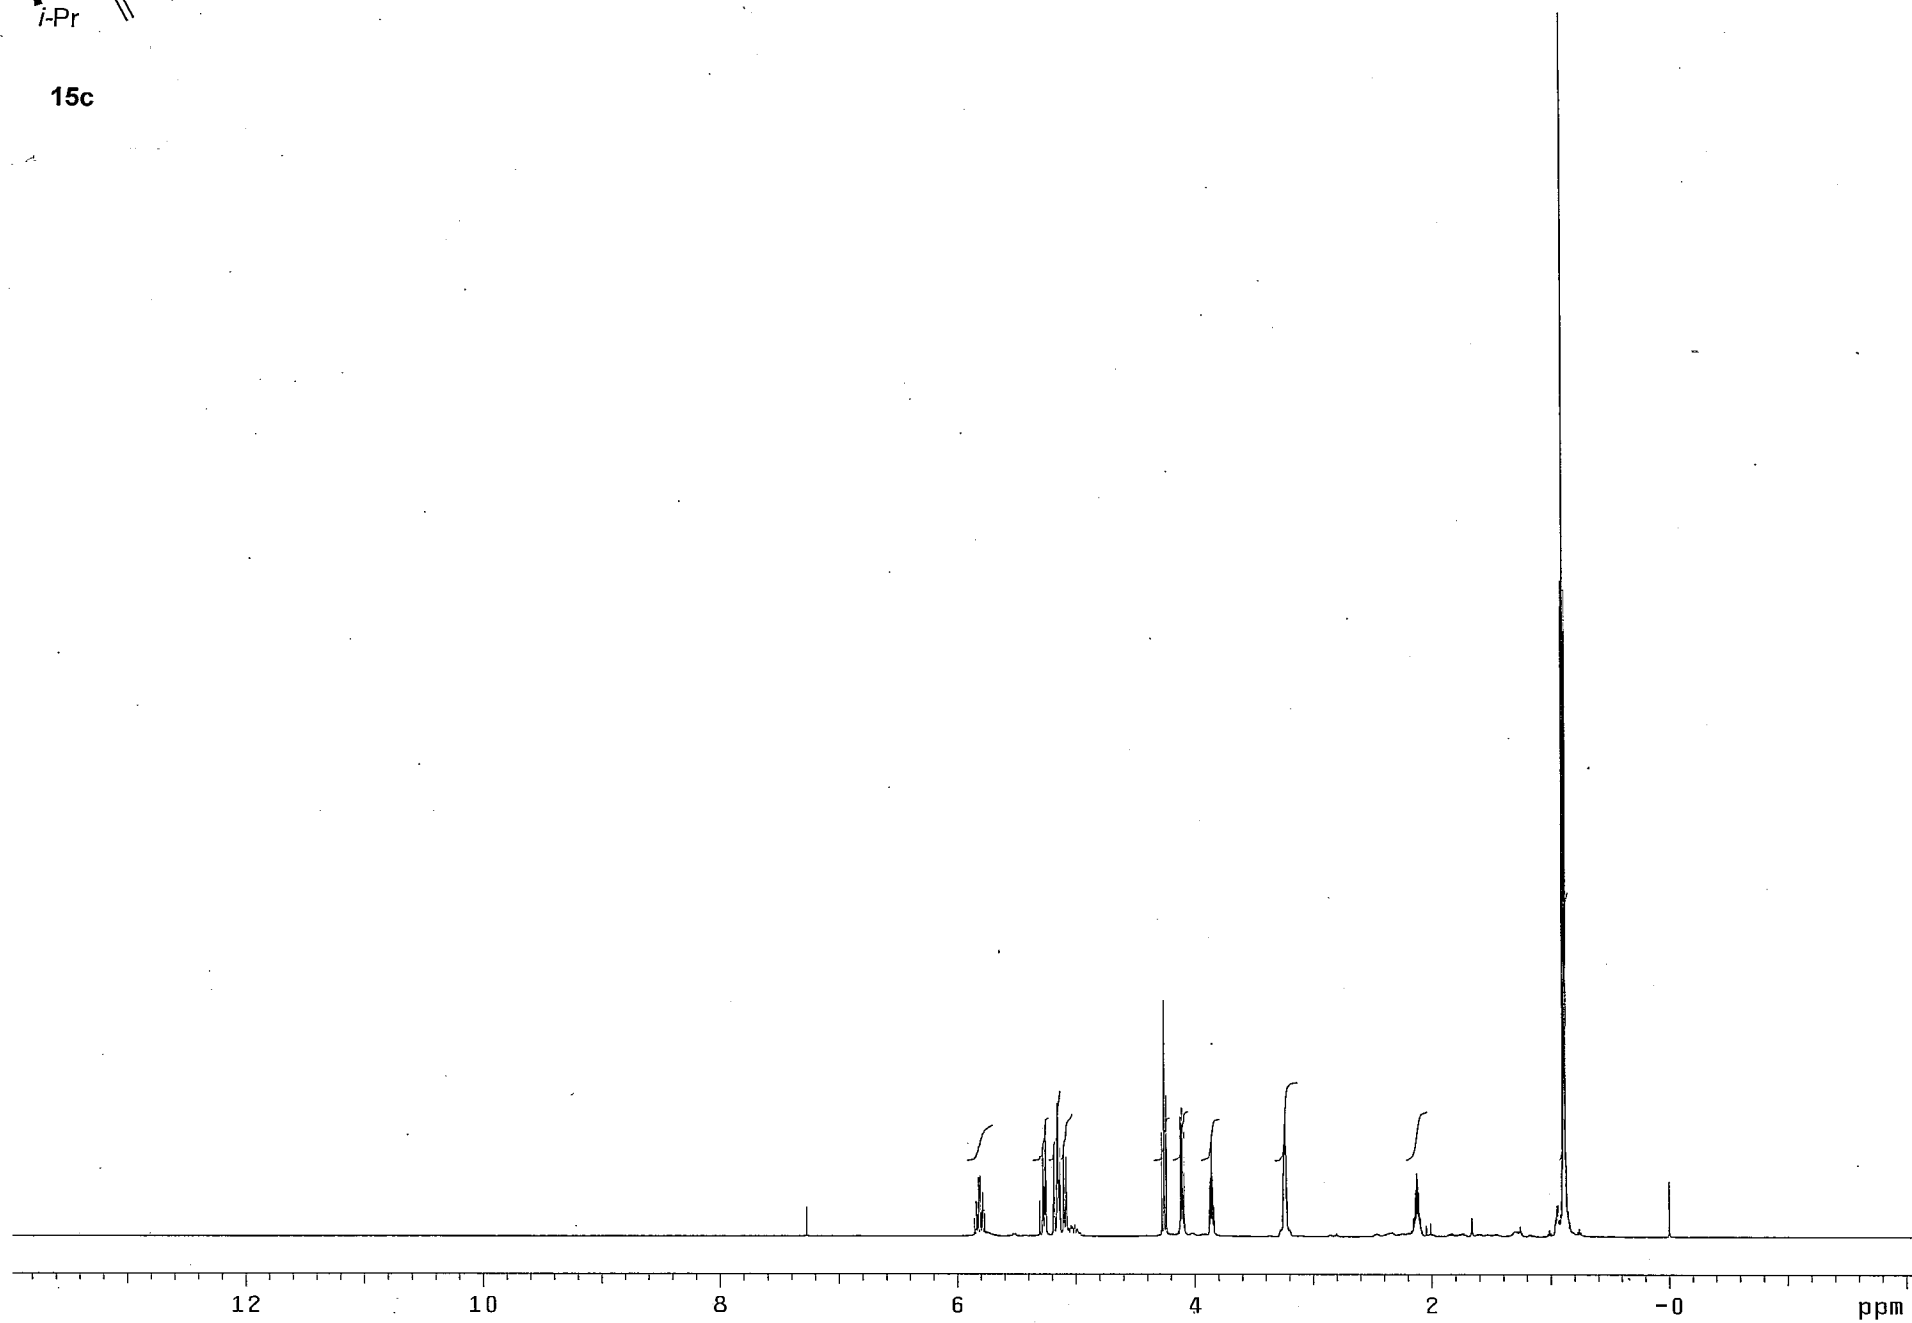

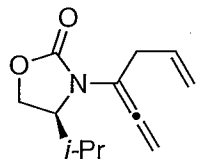

15c

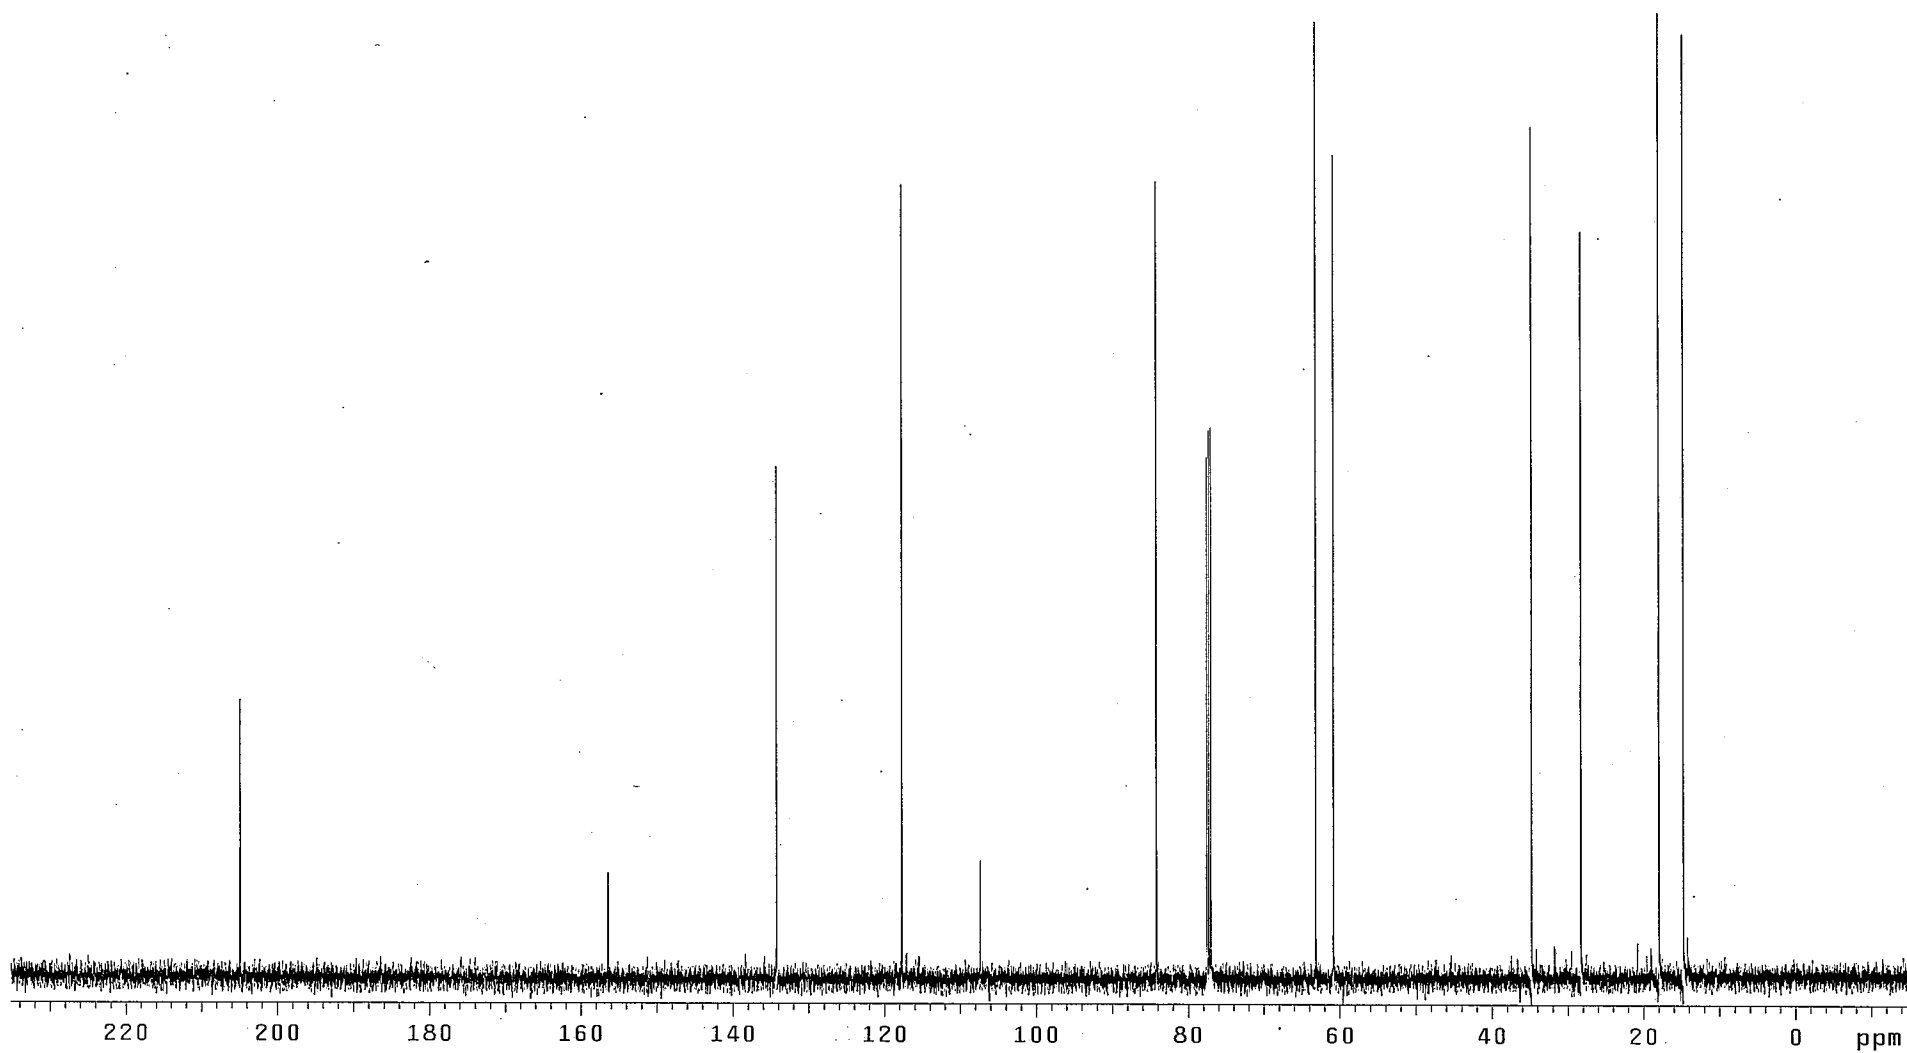

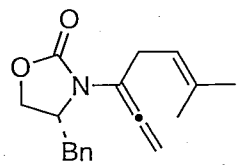

16a

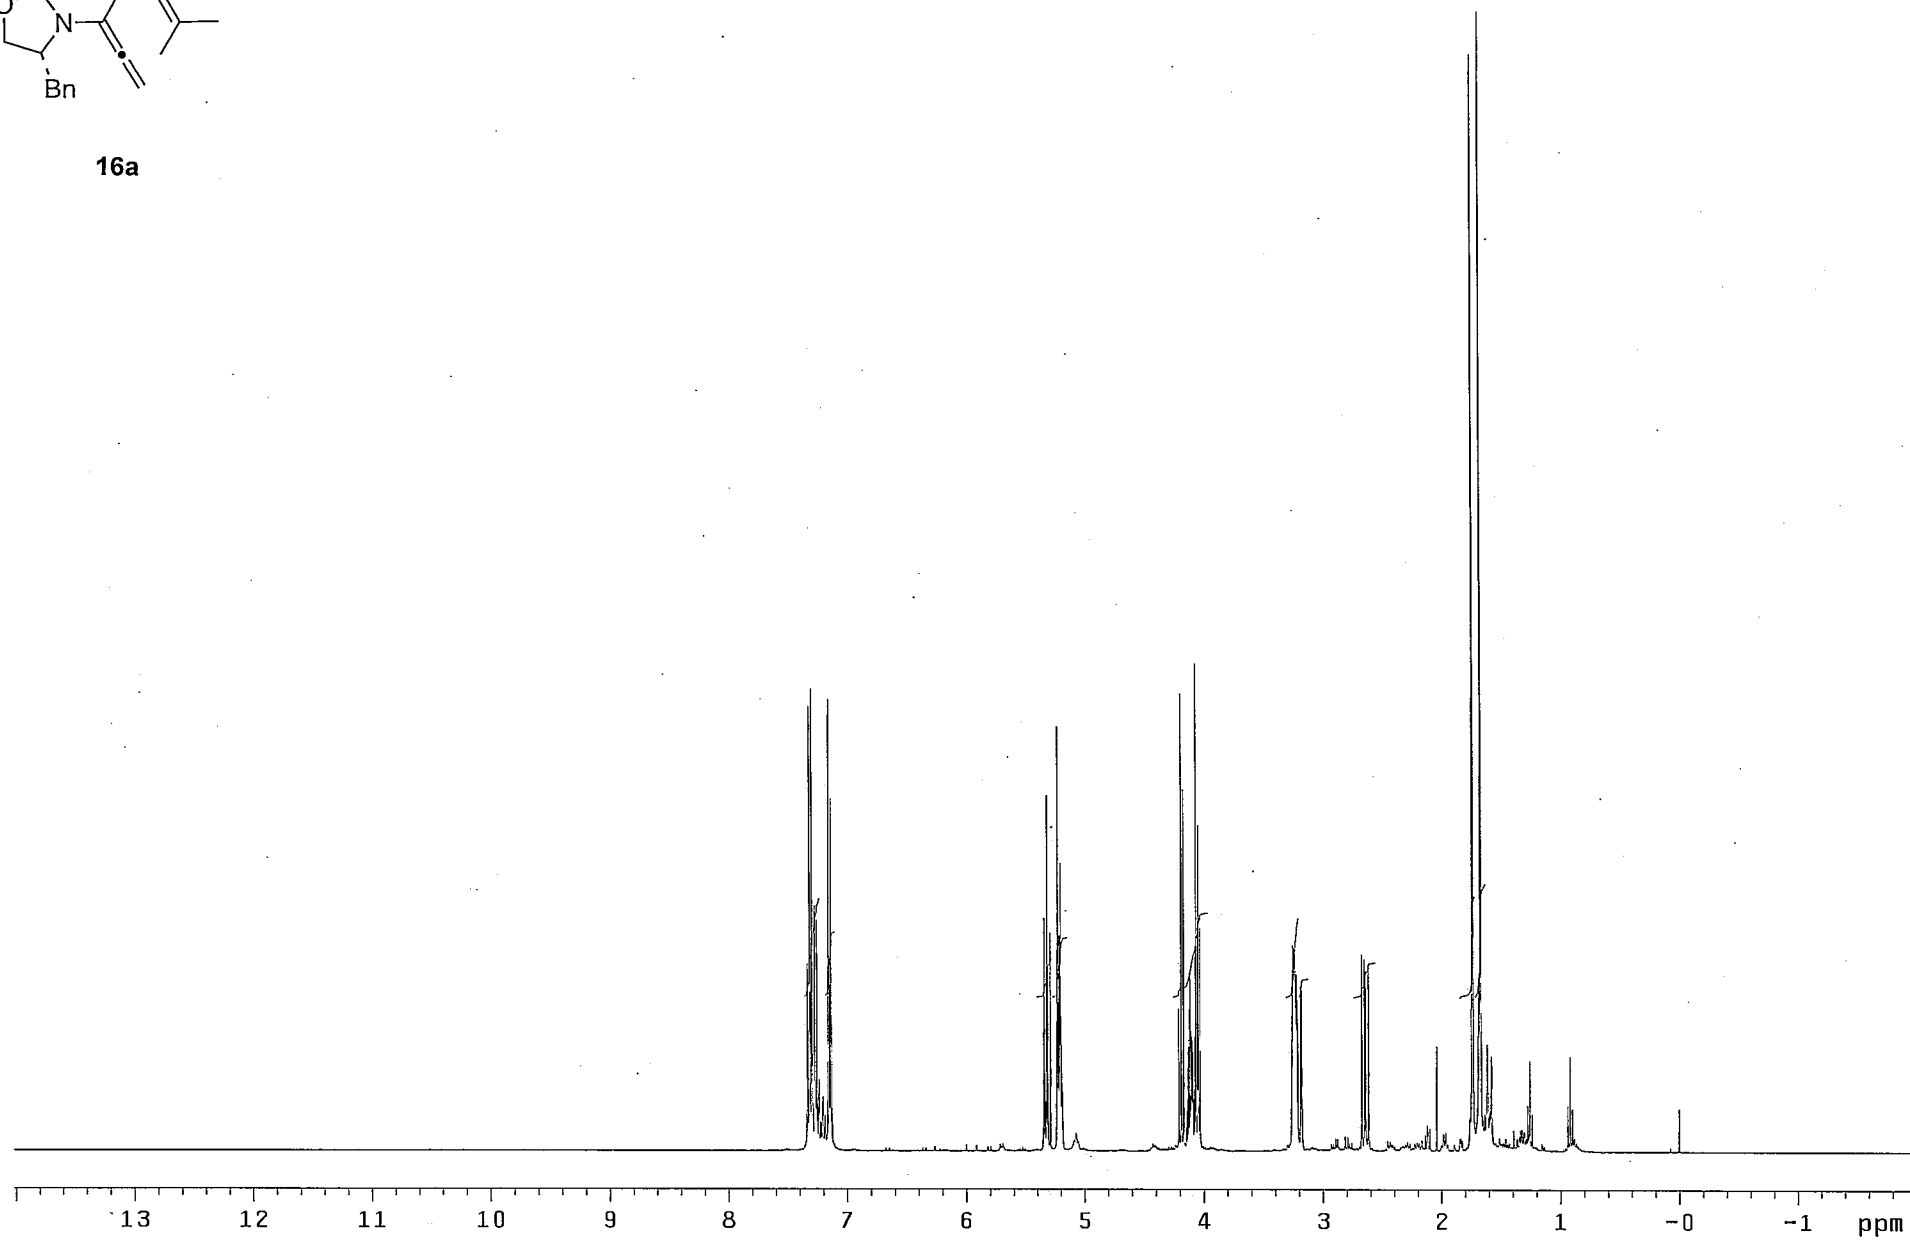

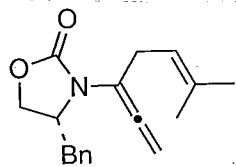

16a

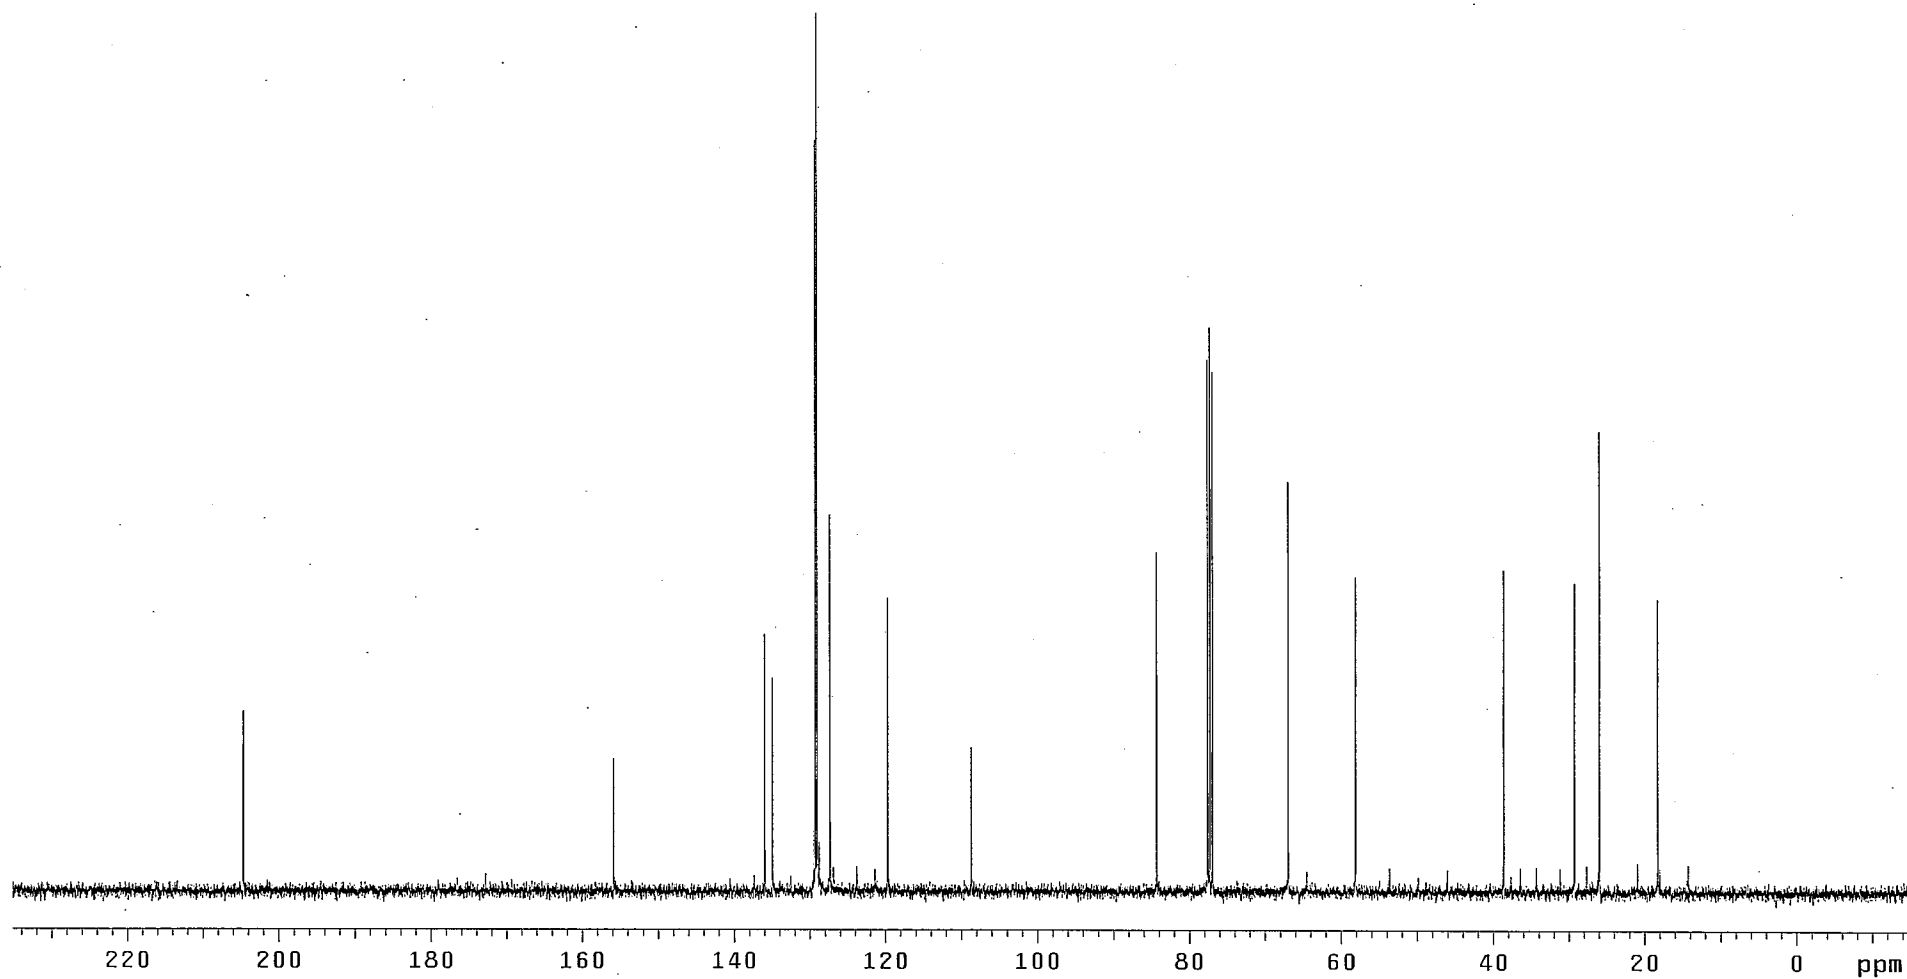

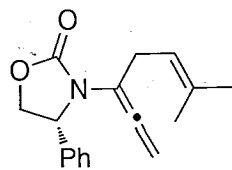

16b

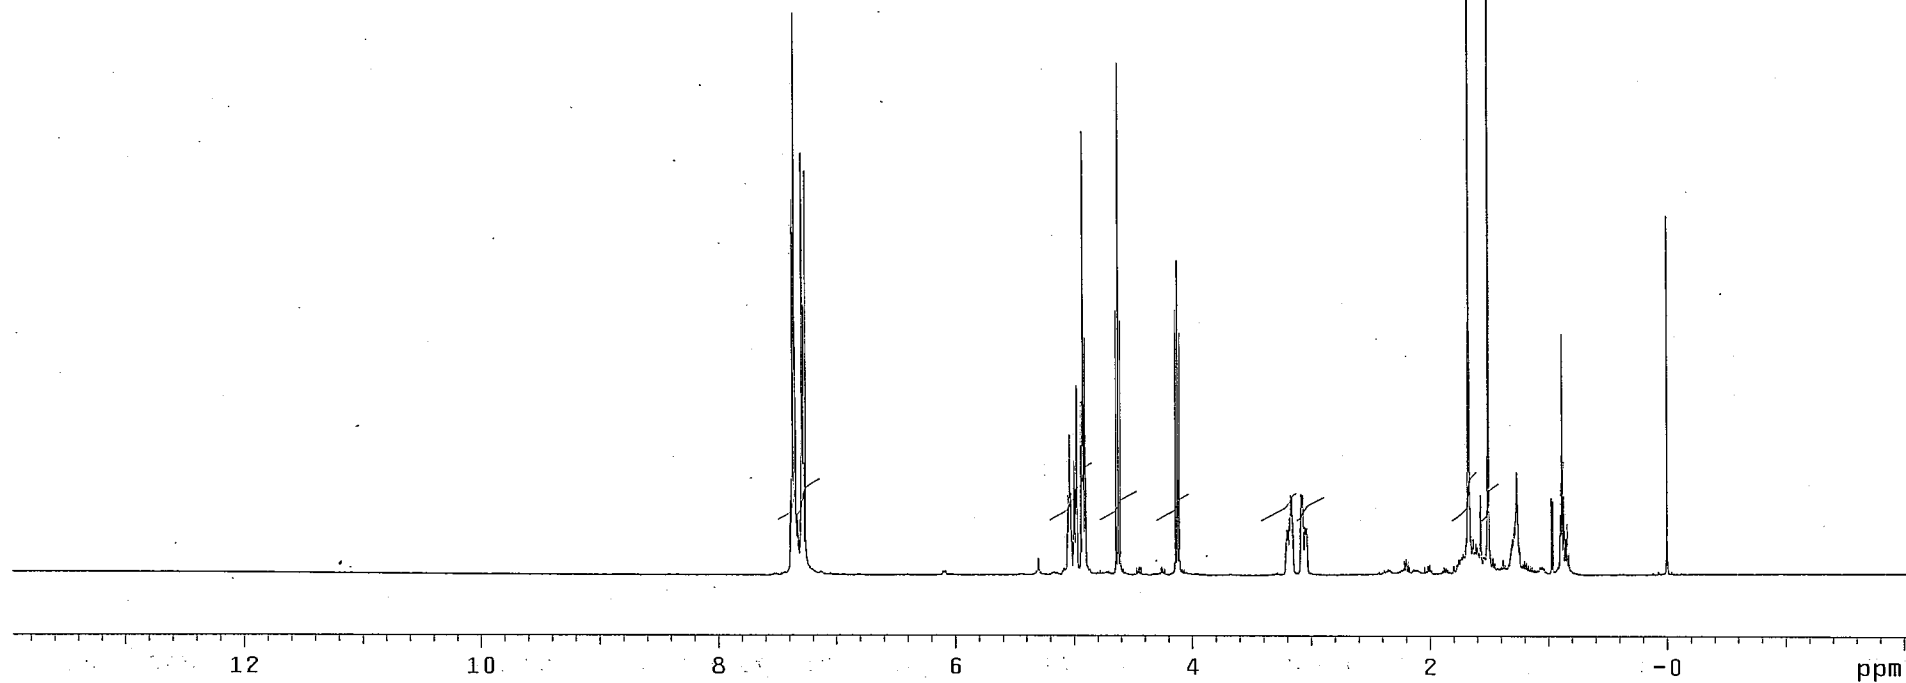

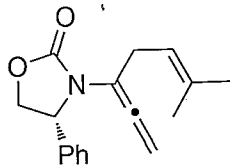

16b

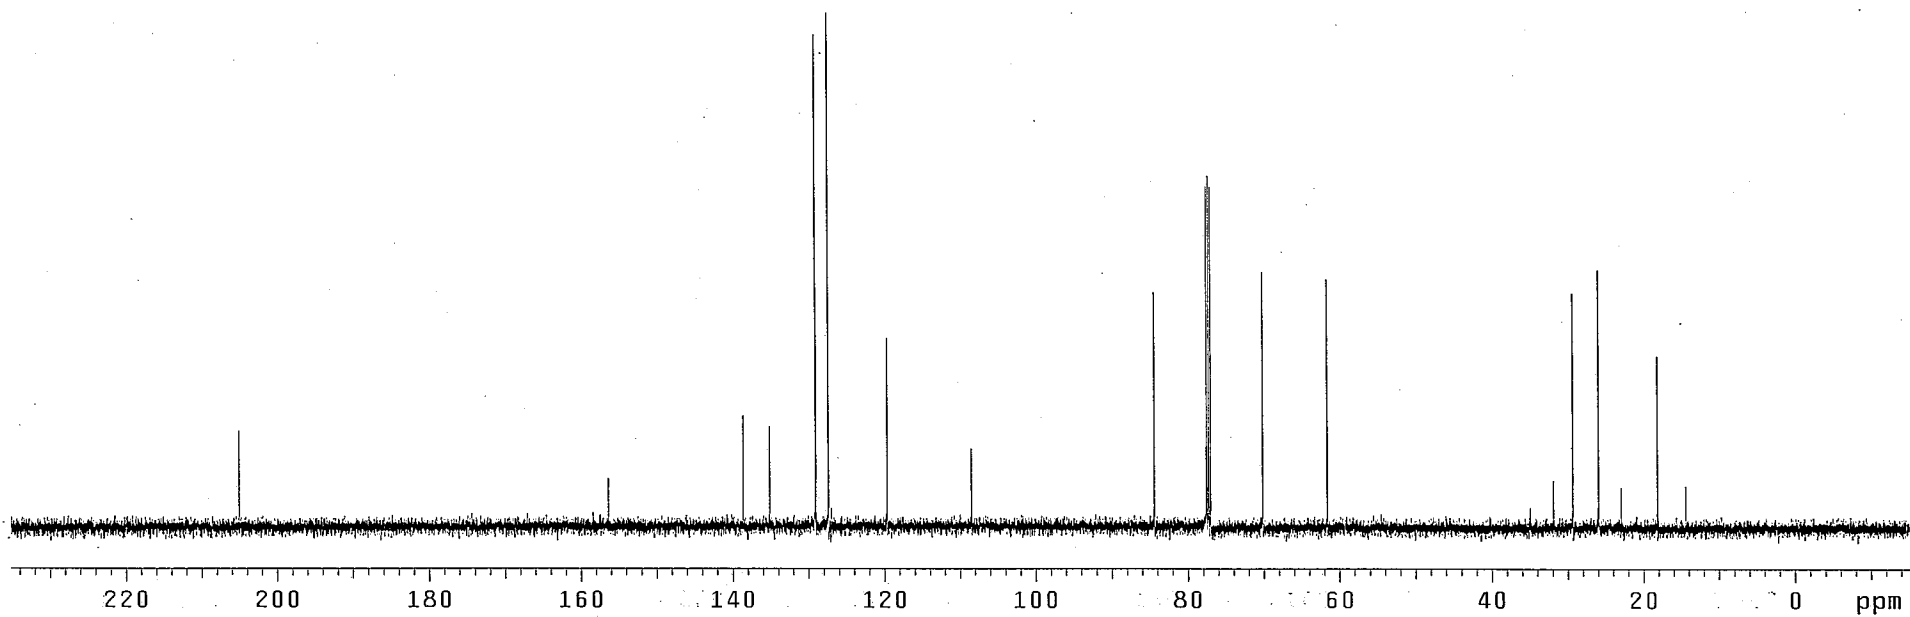

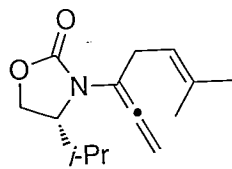

16c

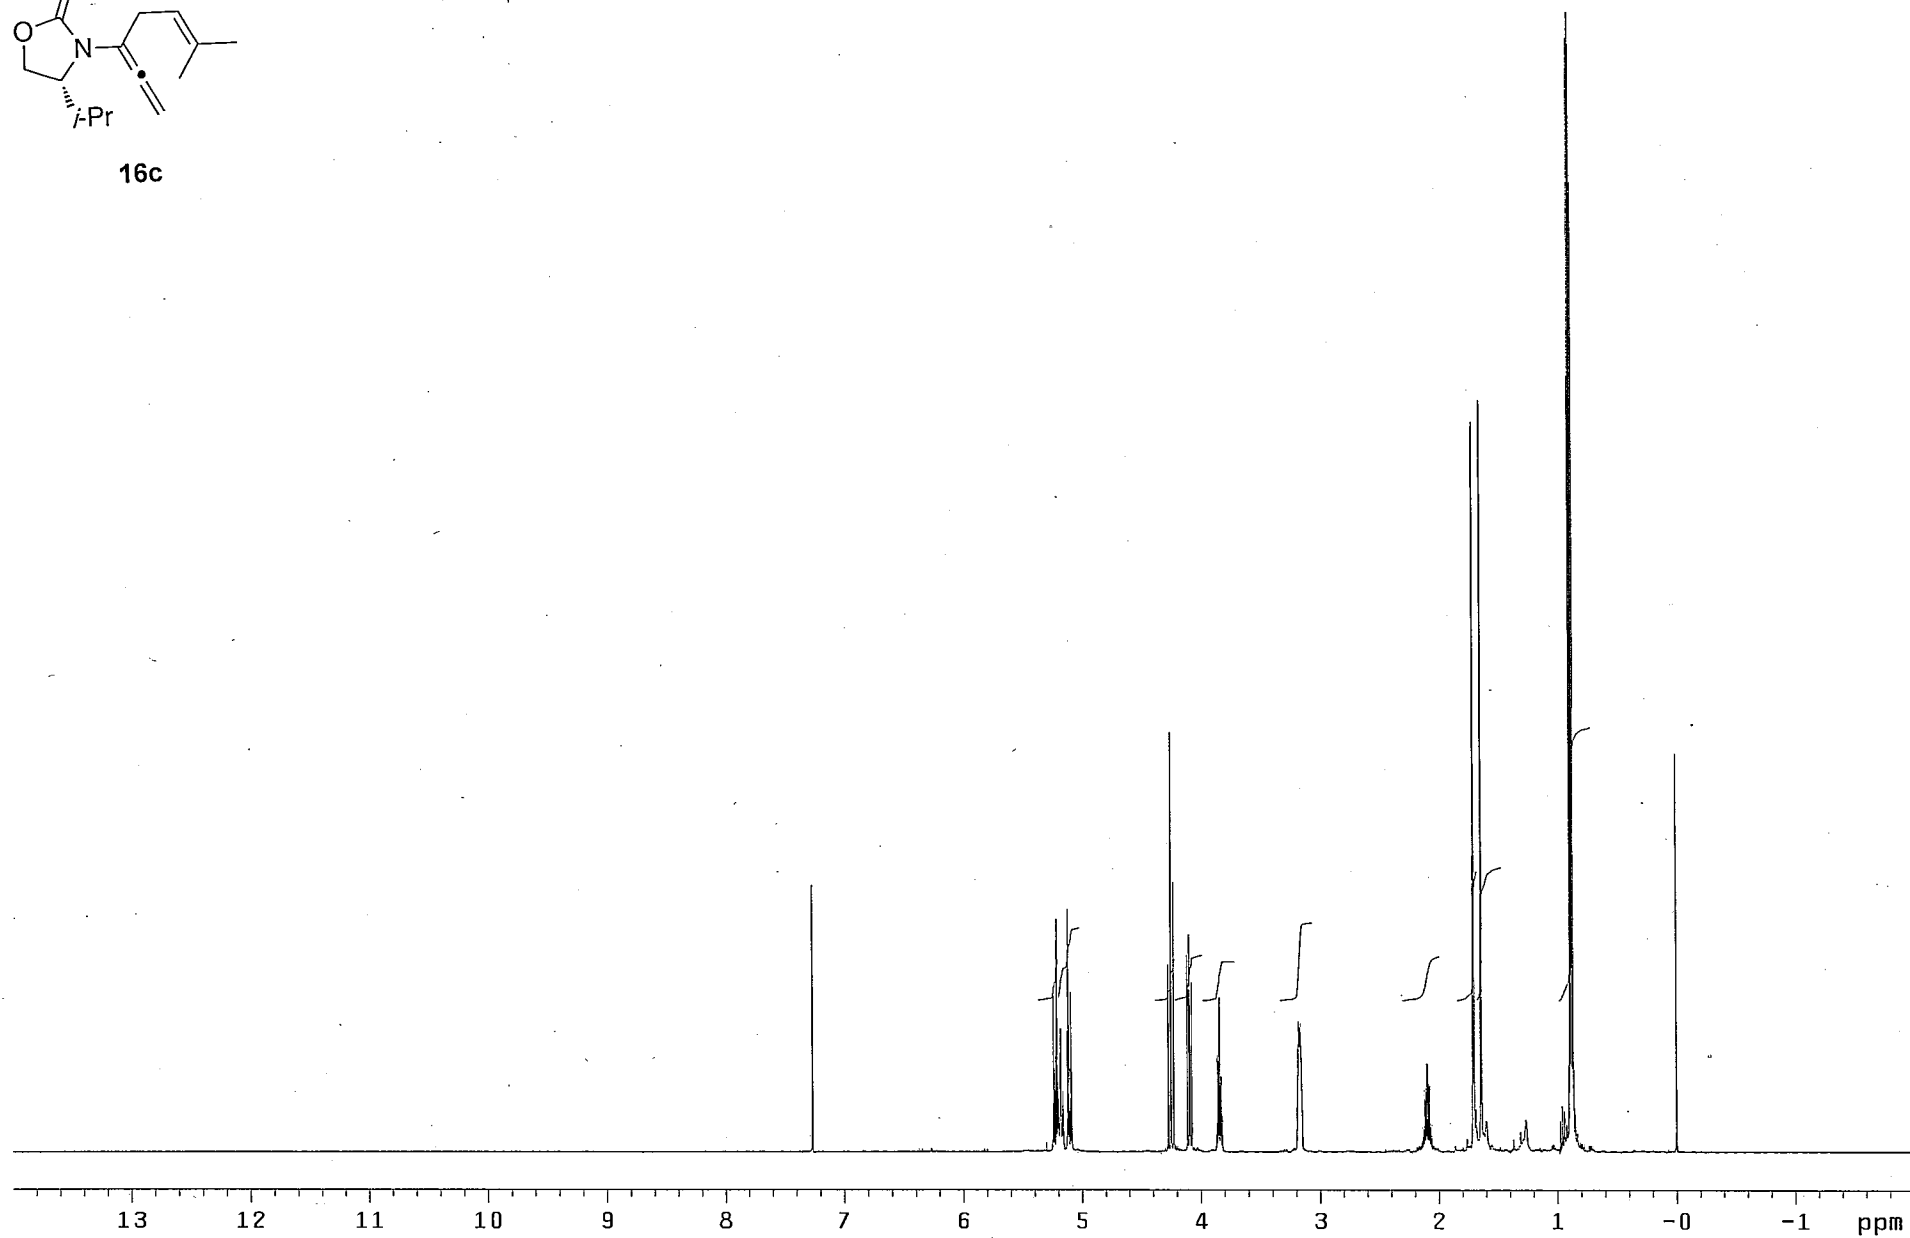

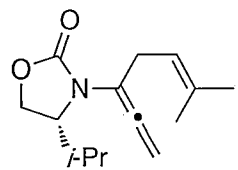

16c

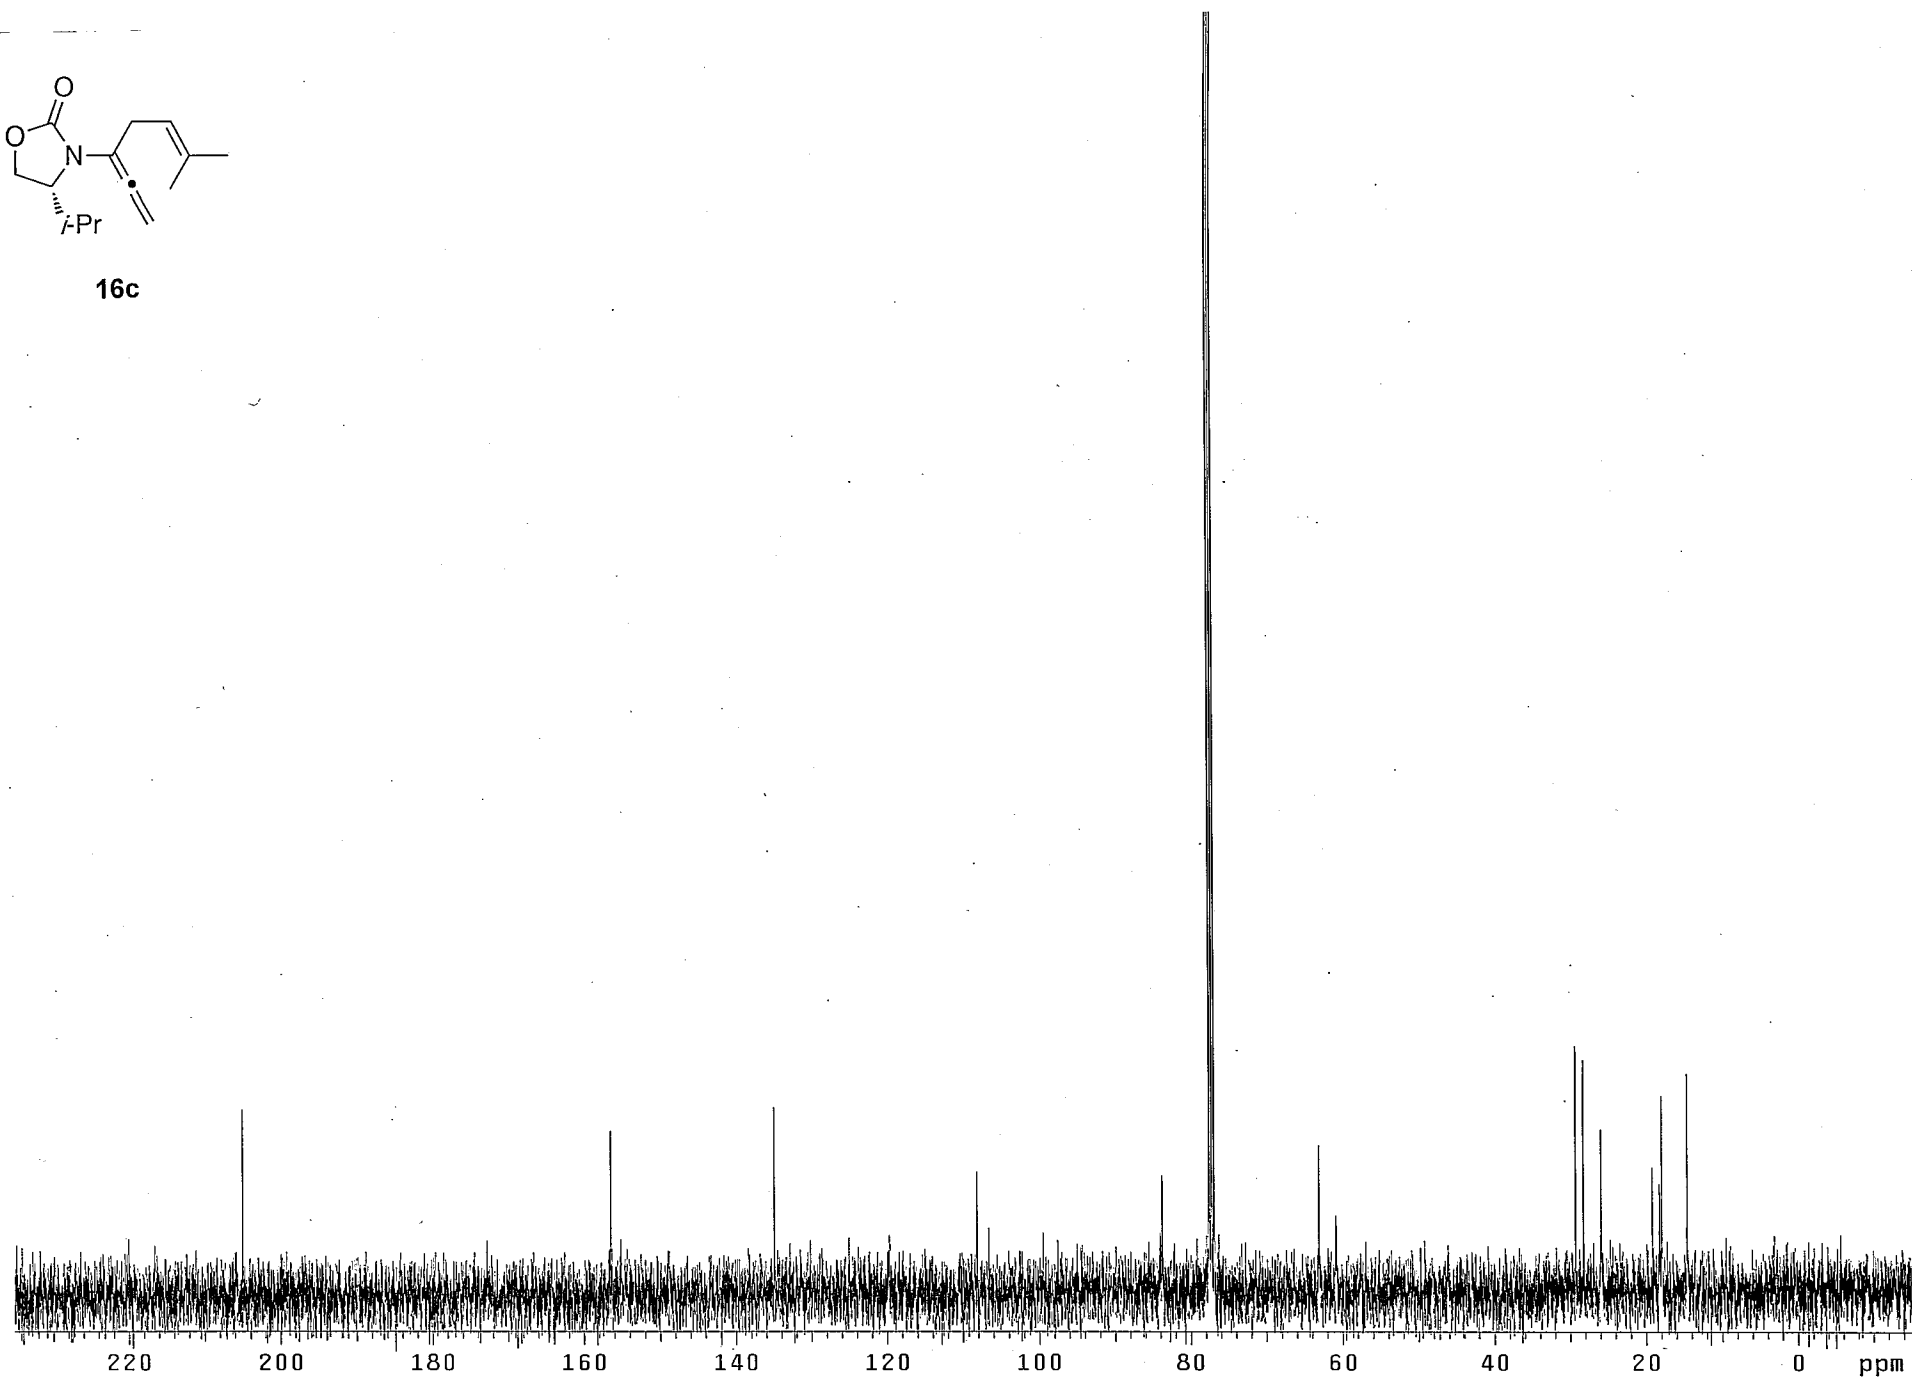



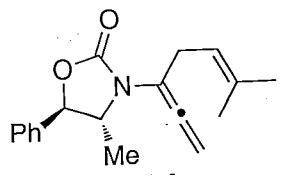

16d

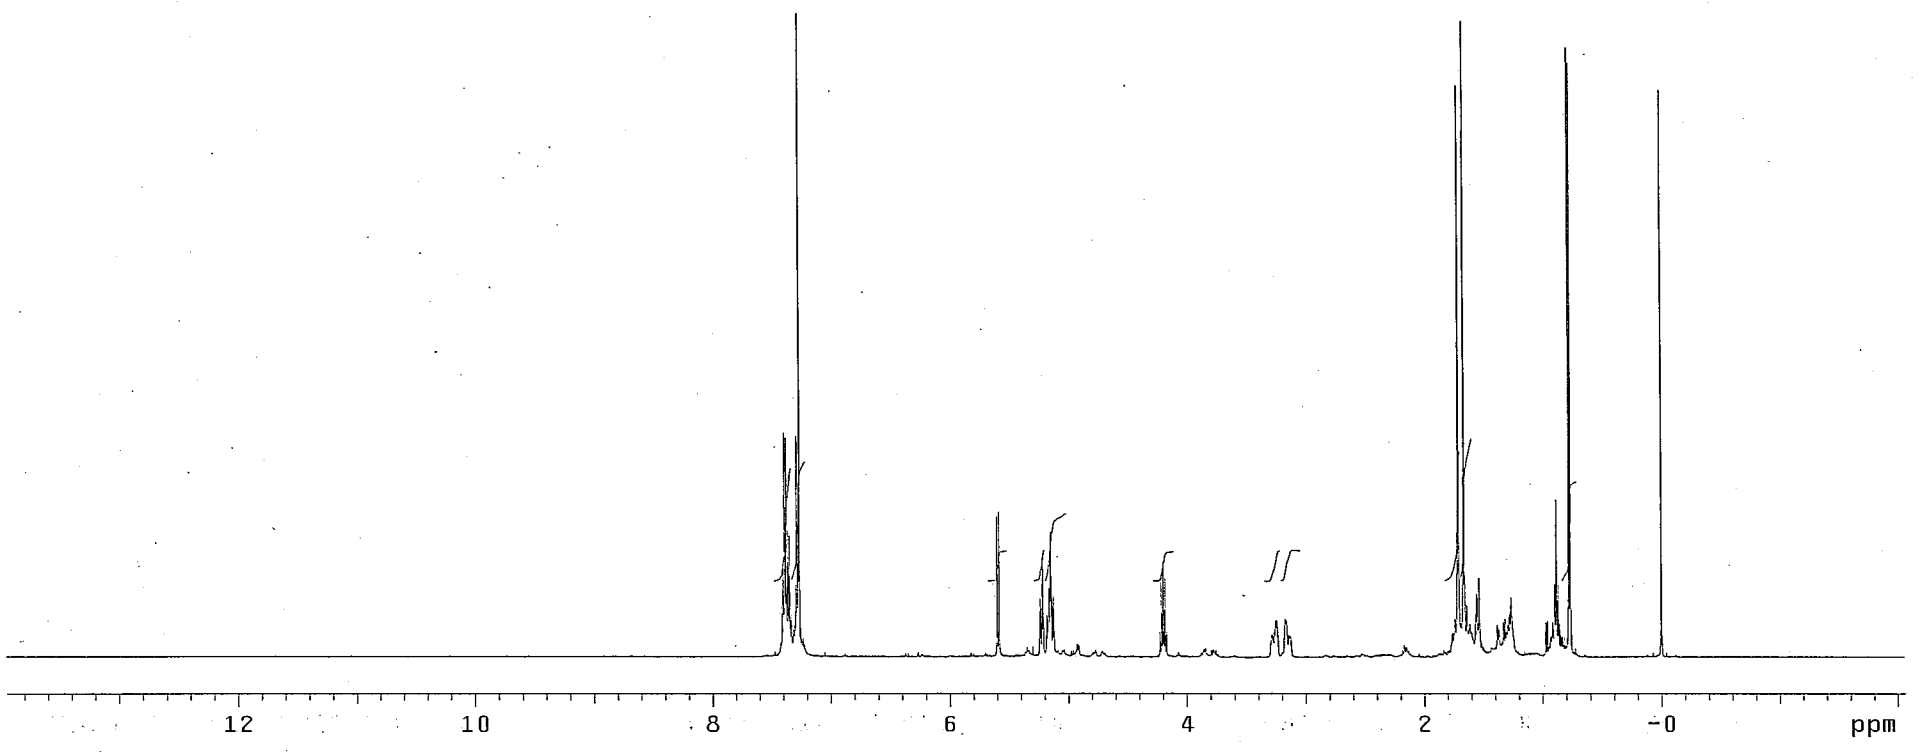



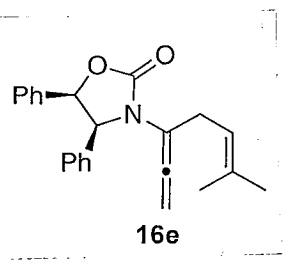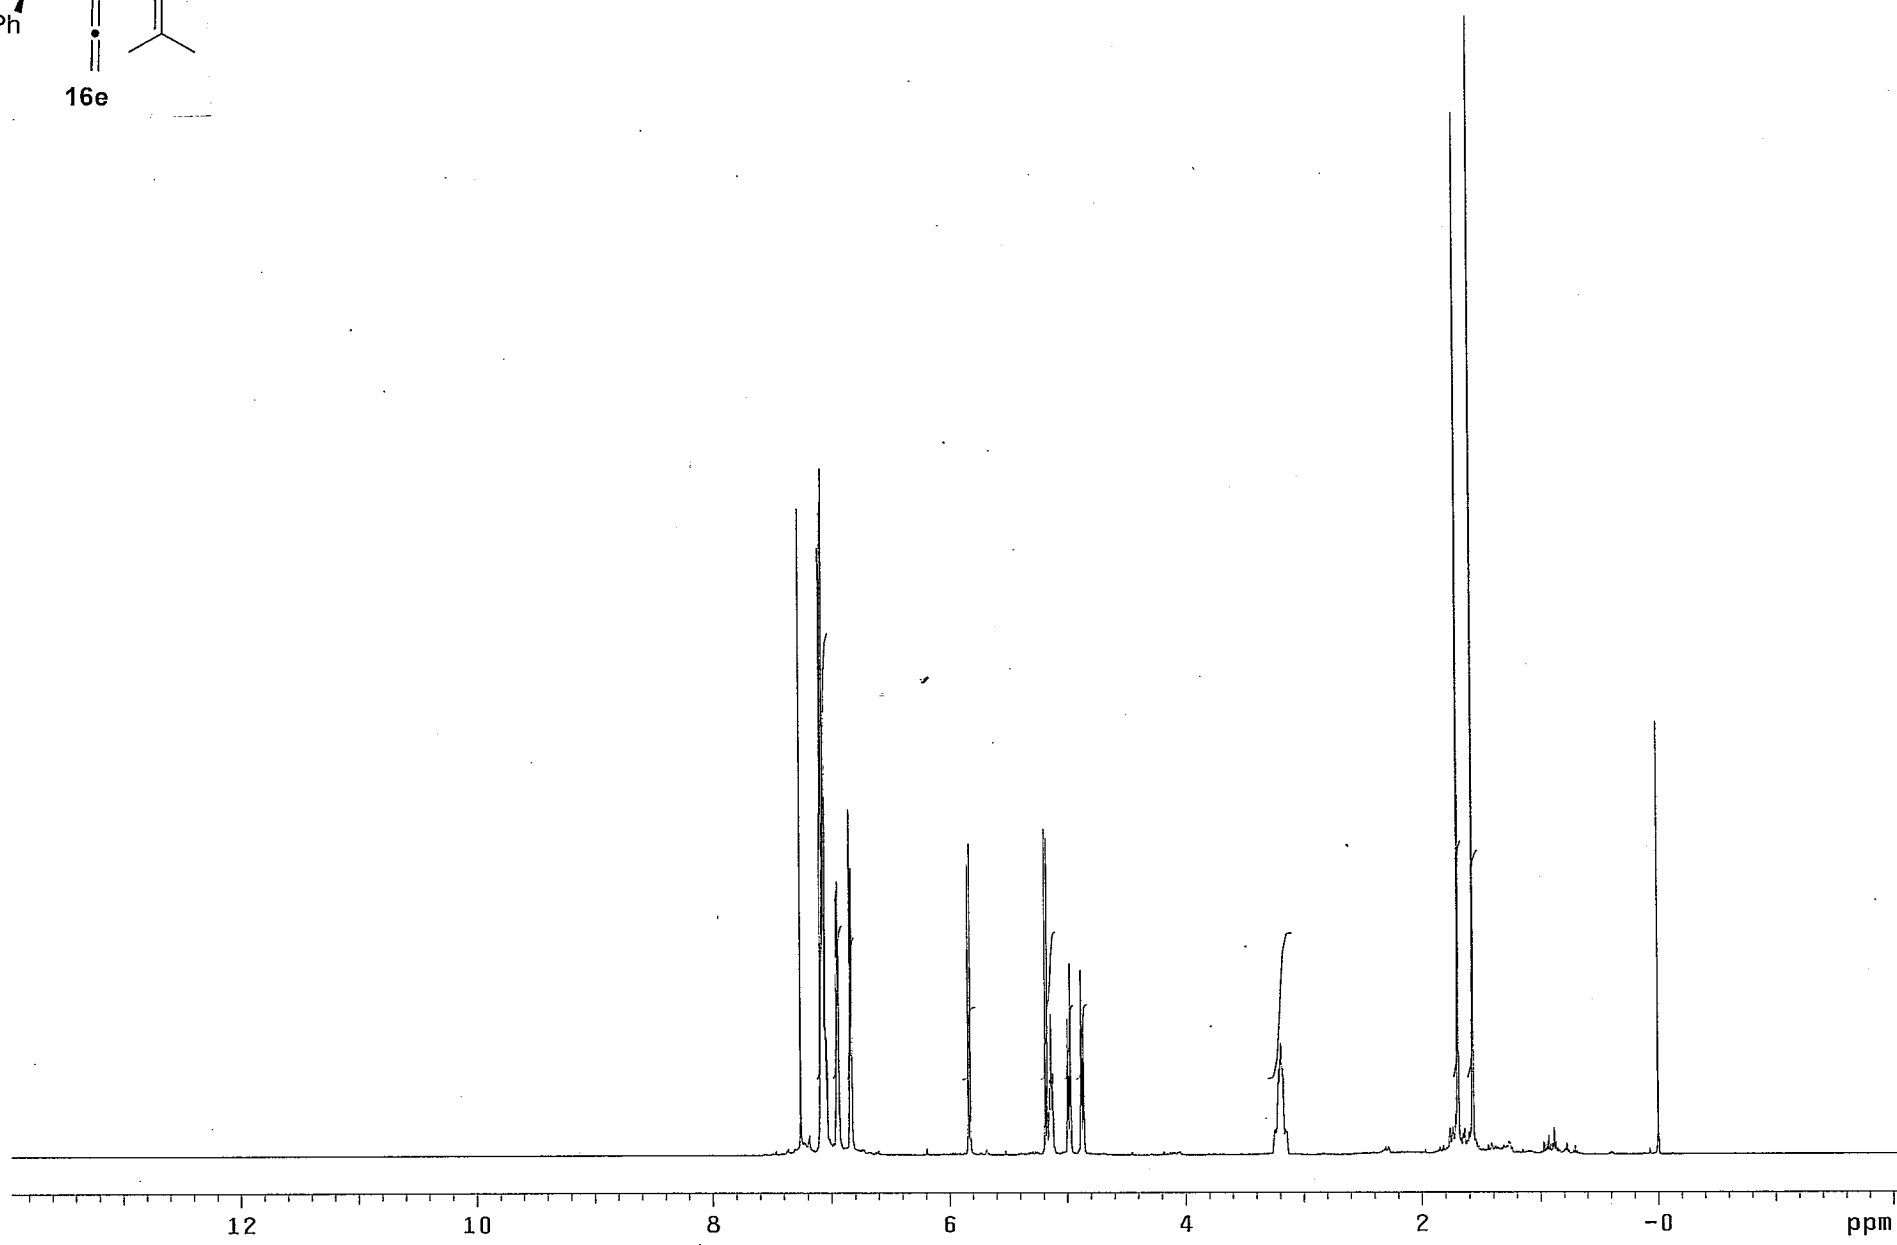

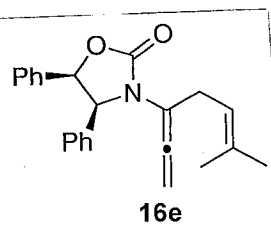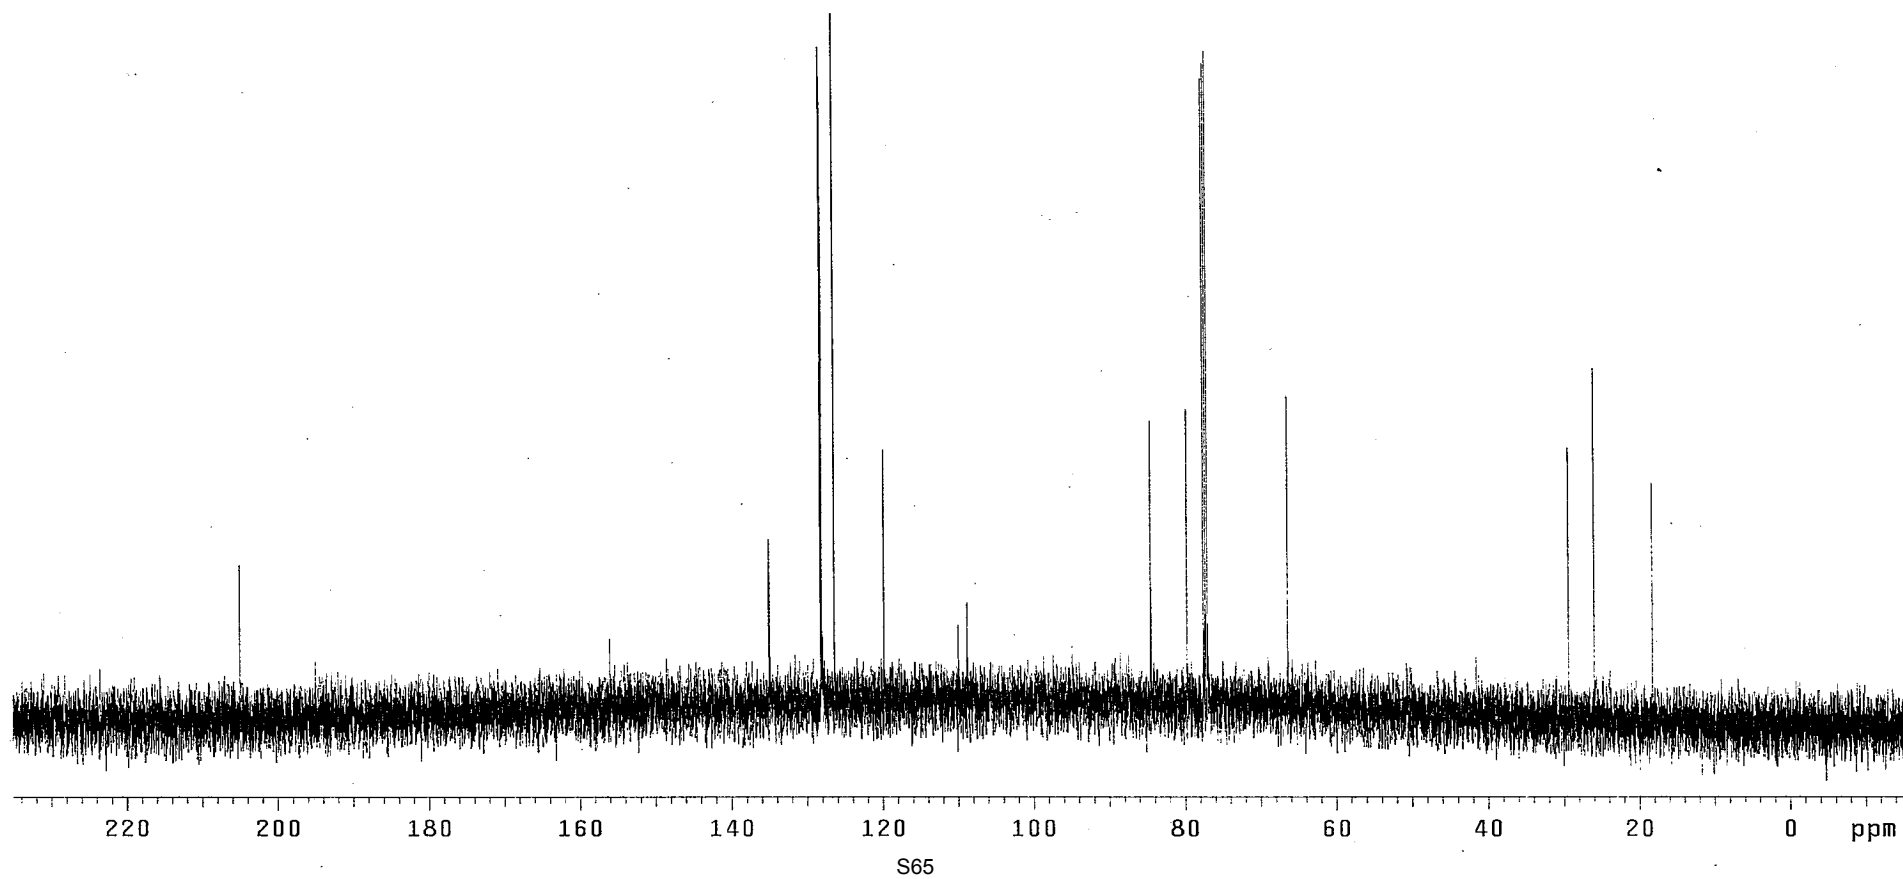

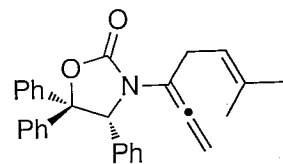

16f

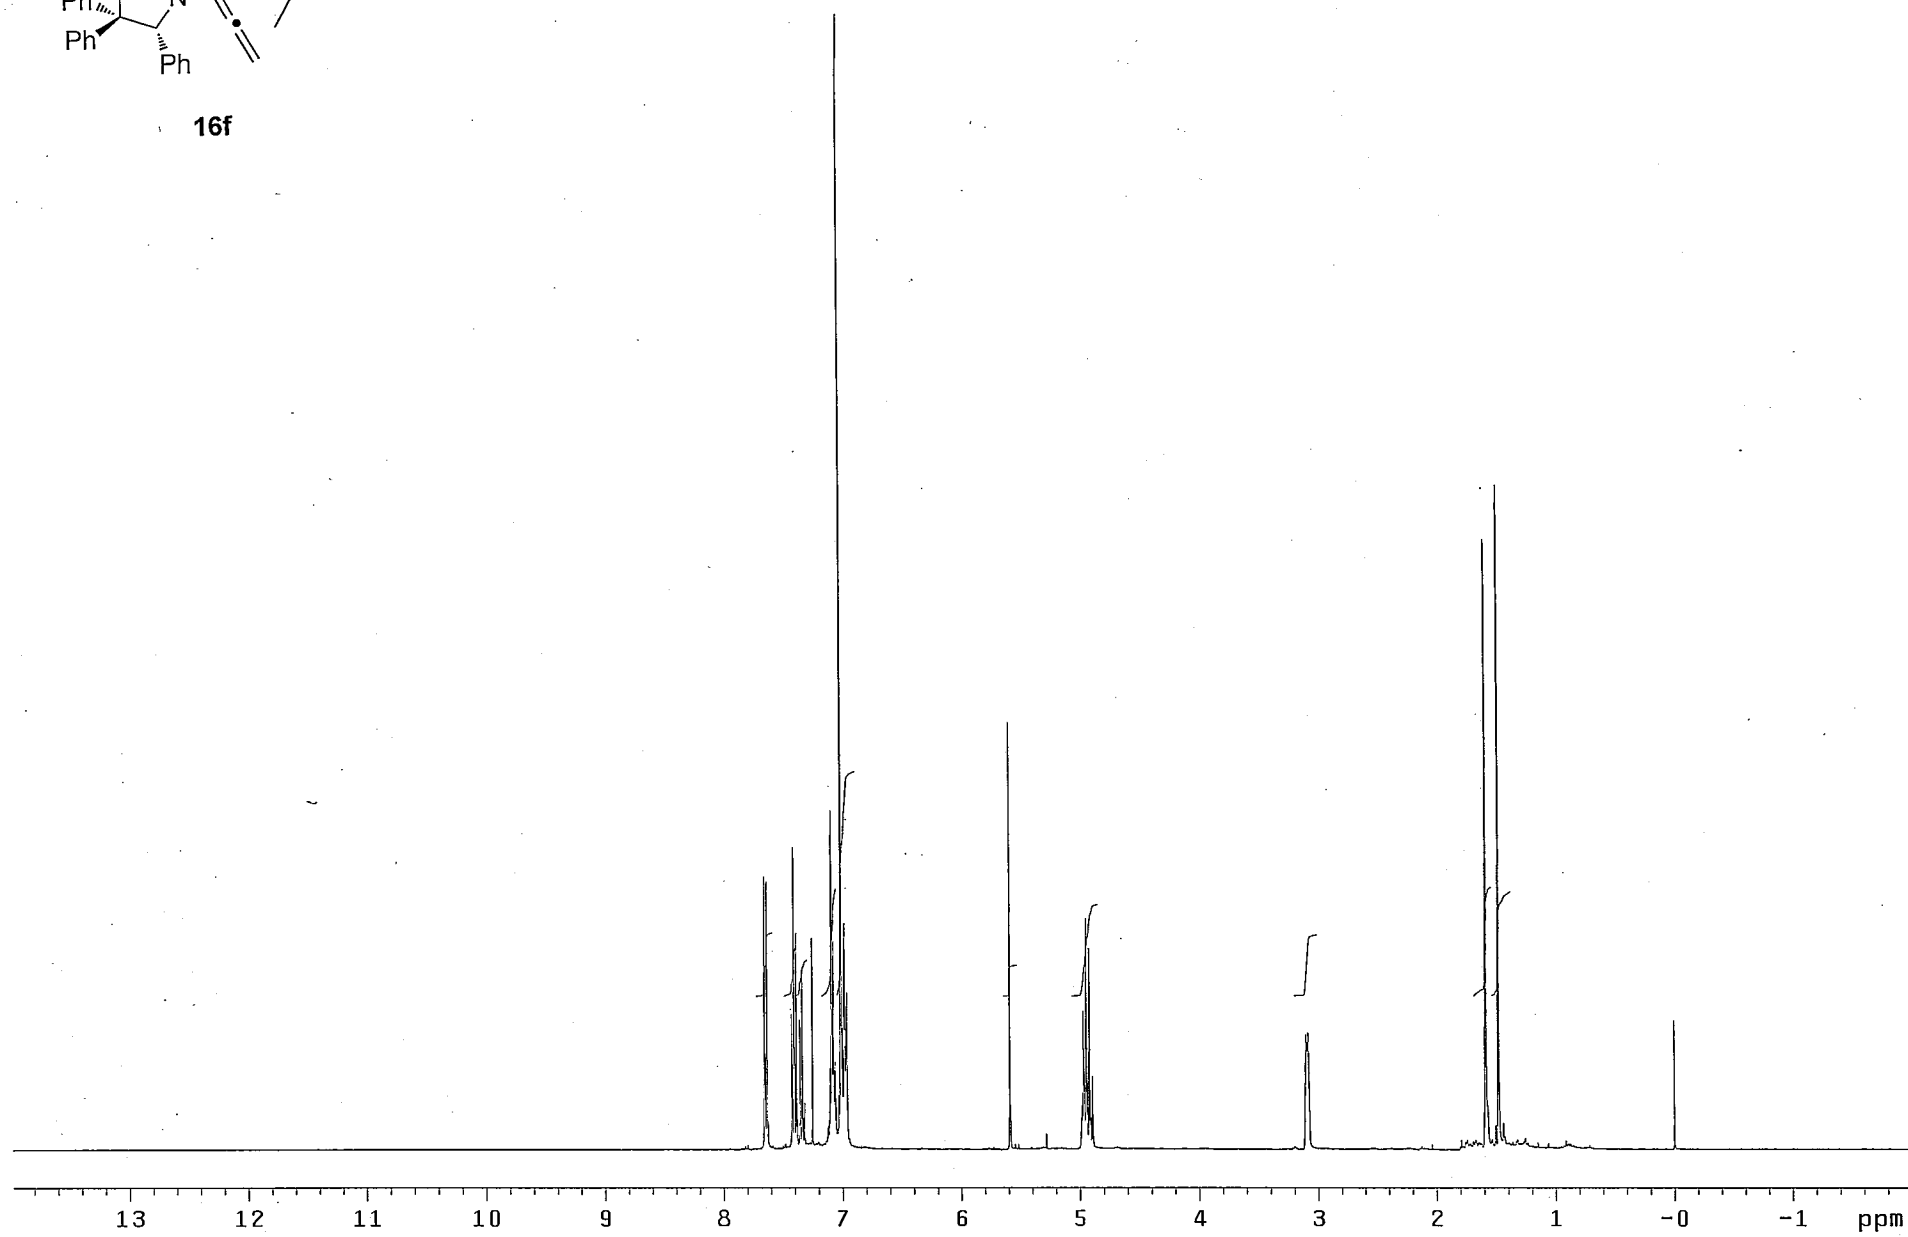

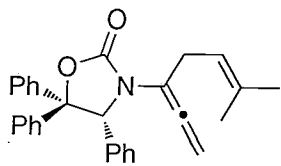

16f

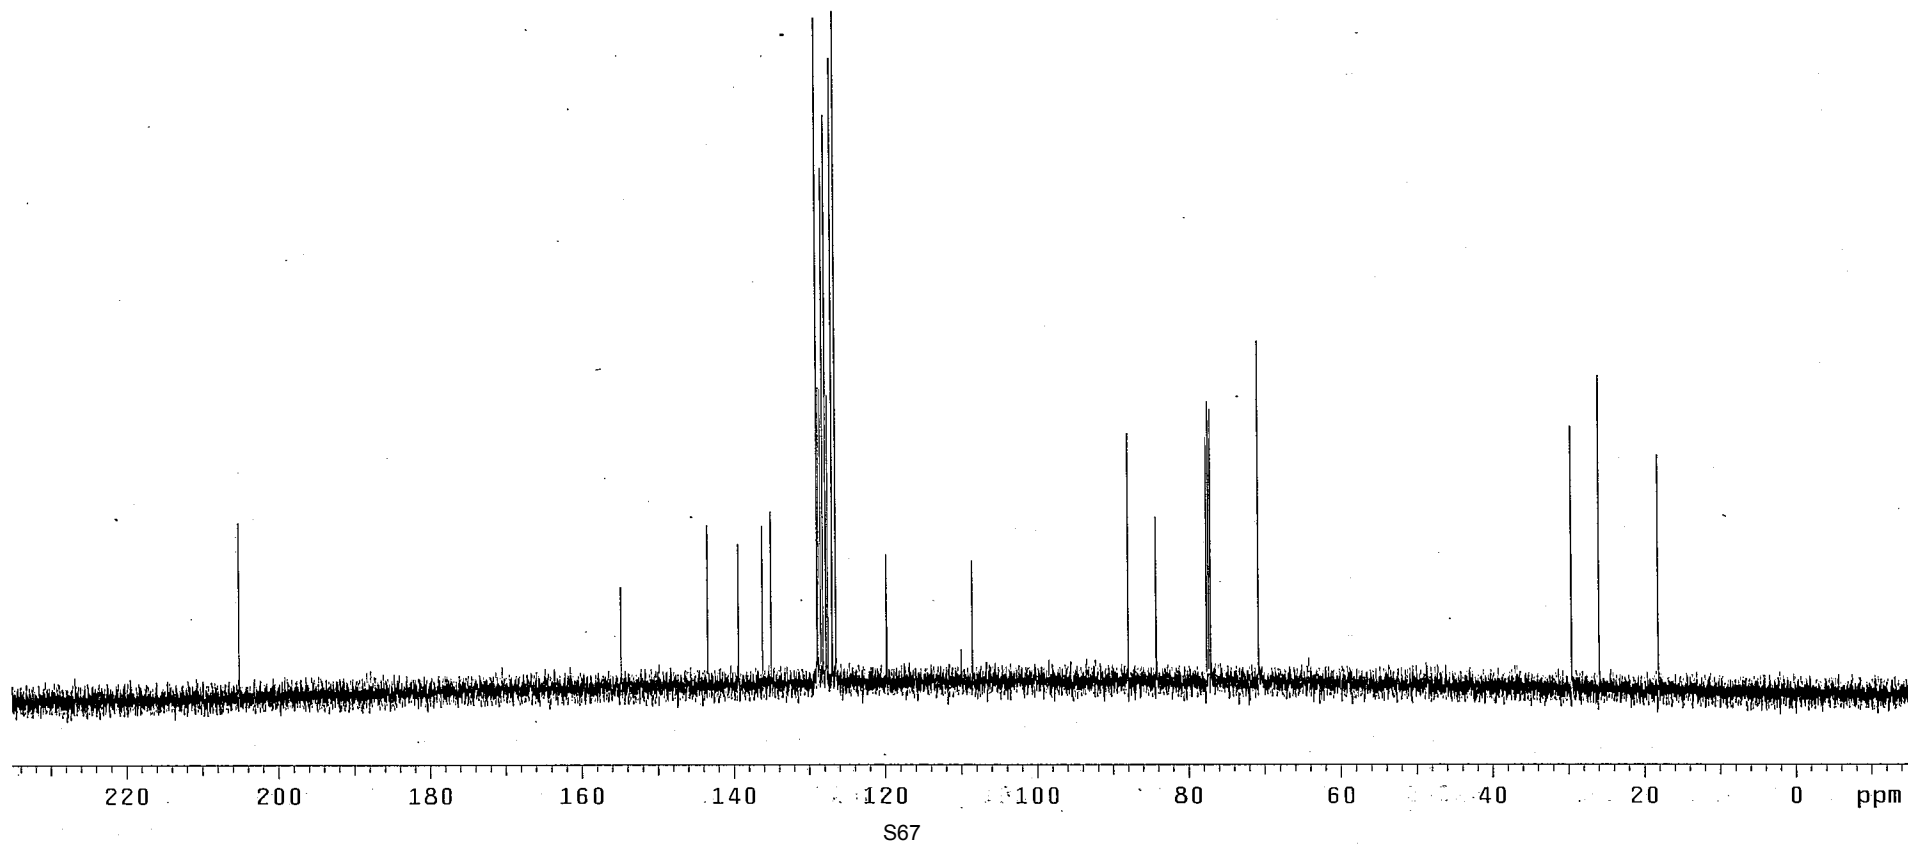

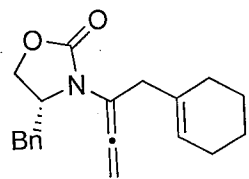

17

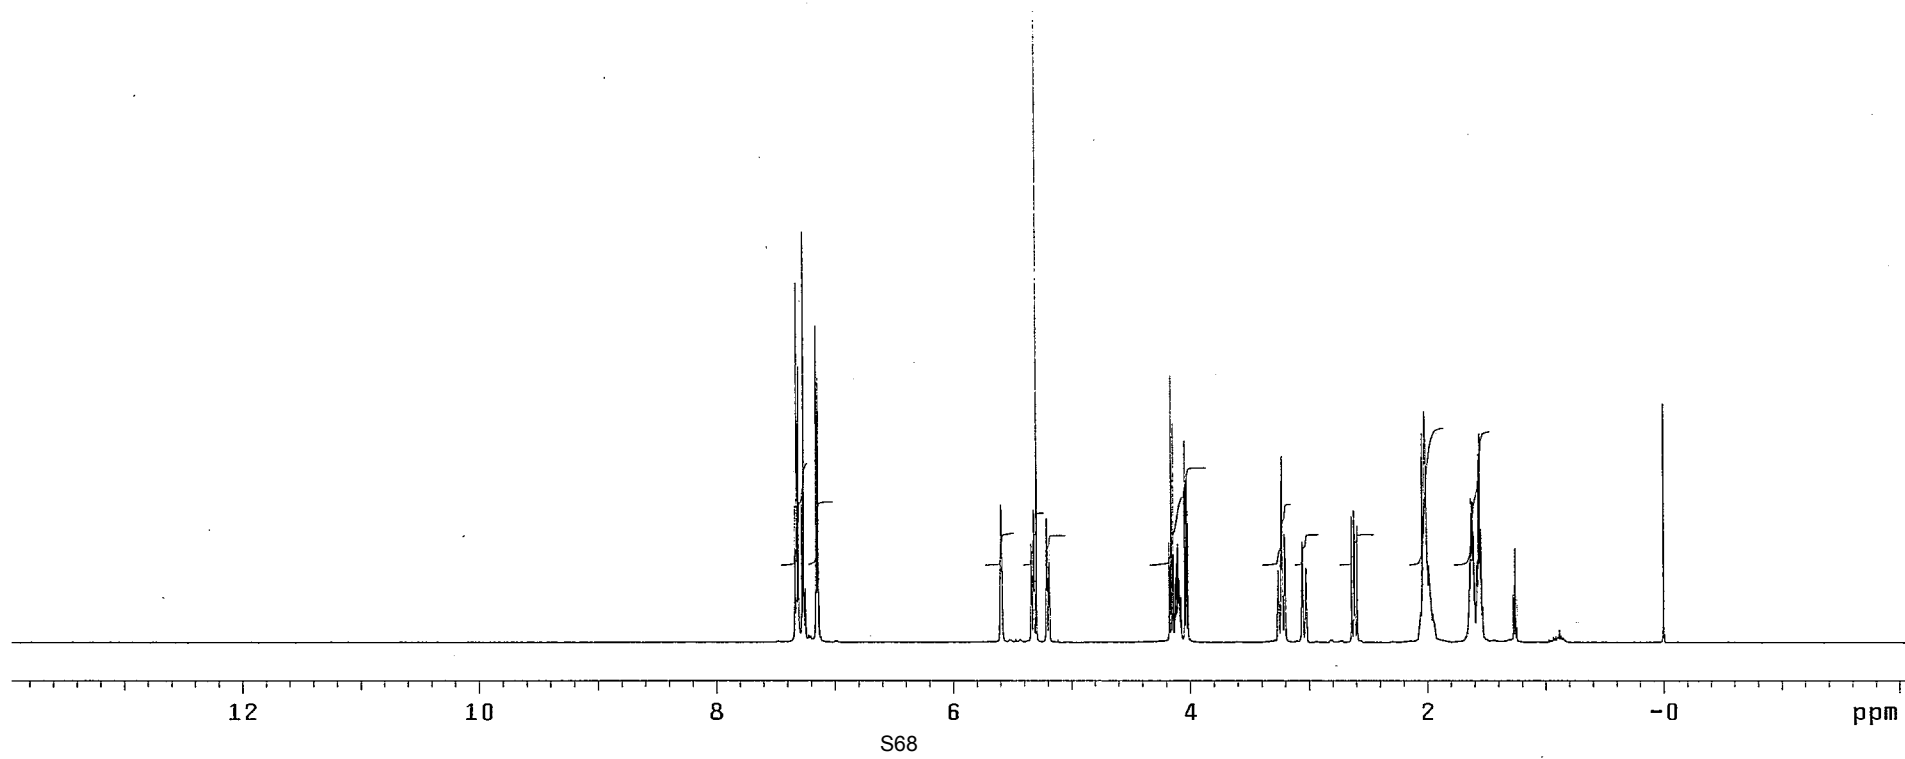

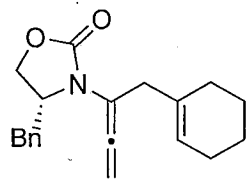

17

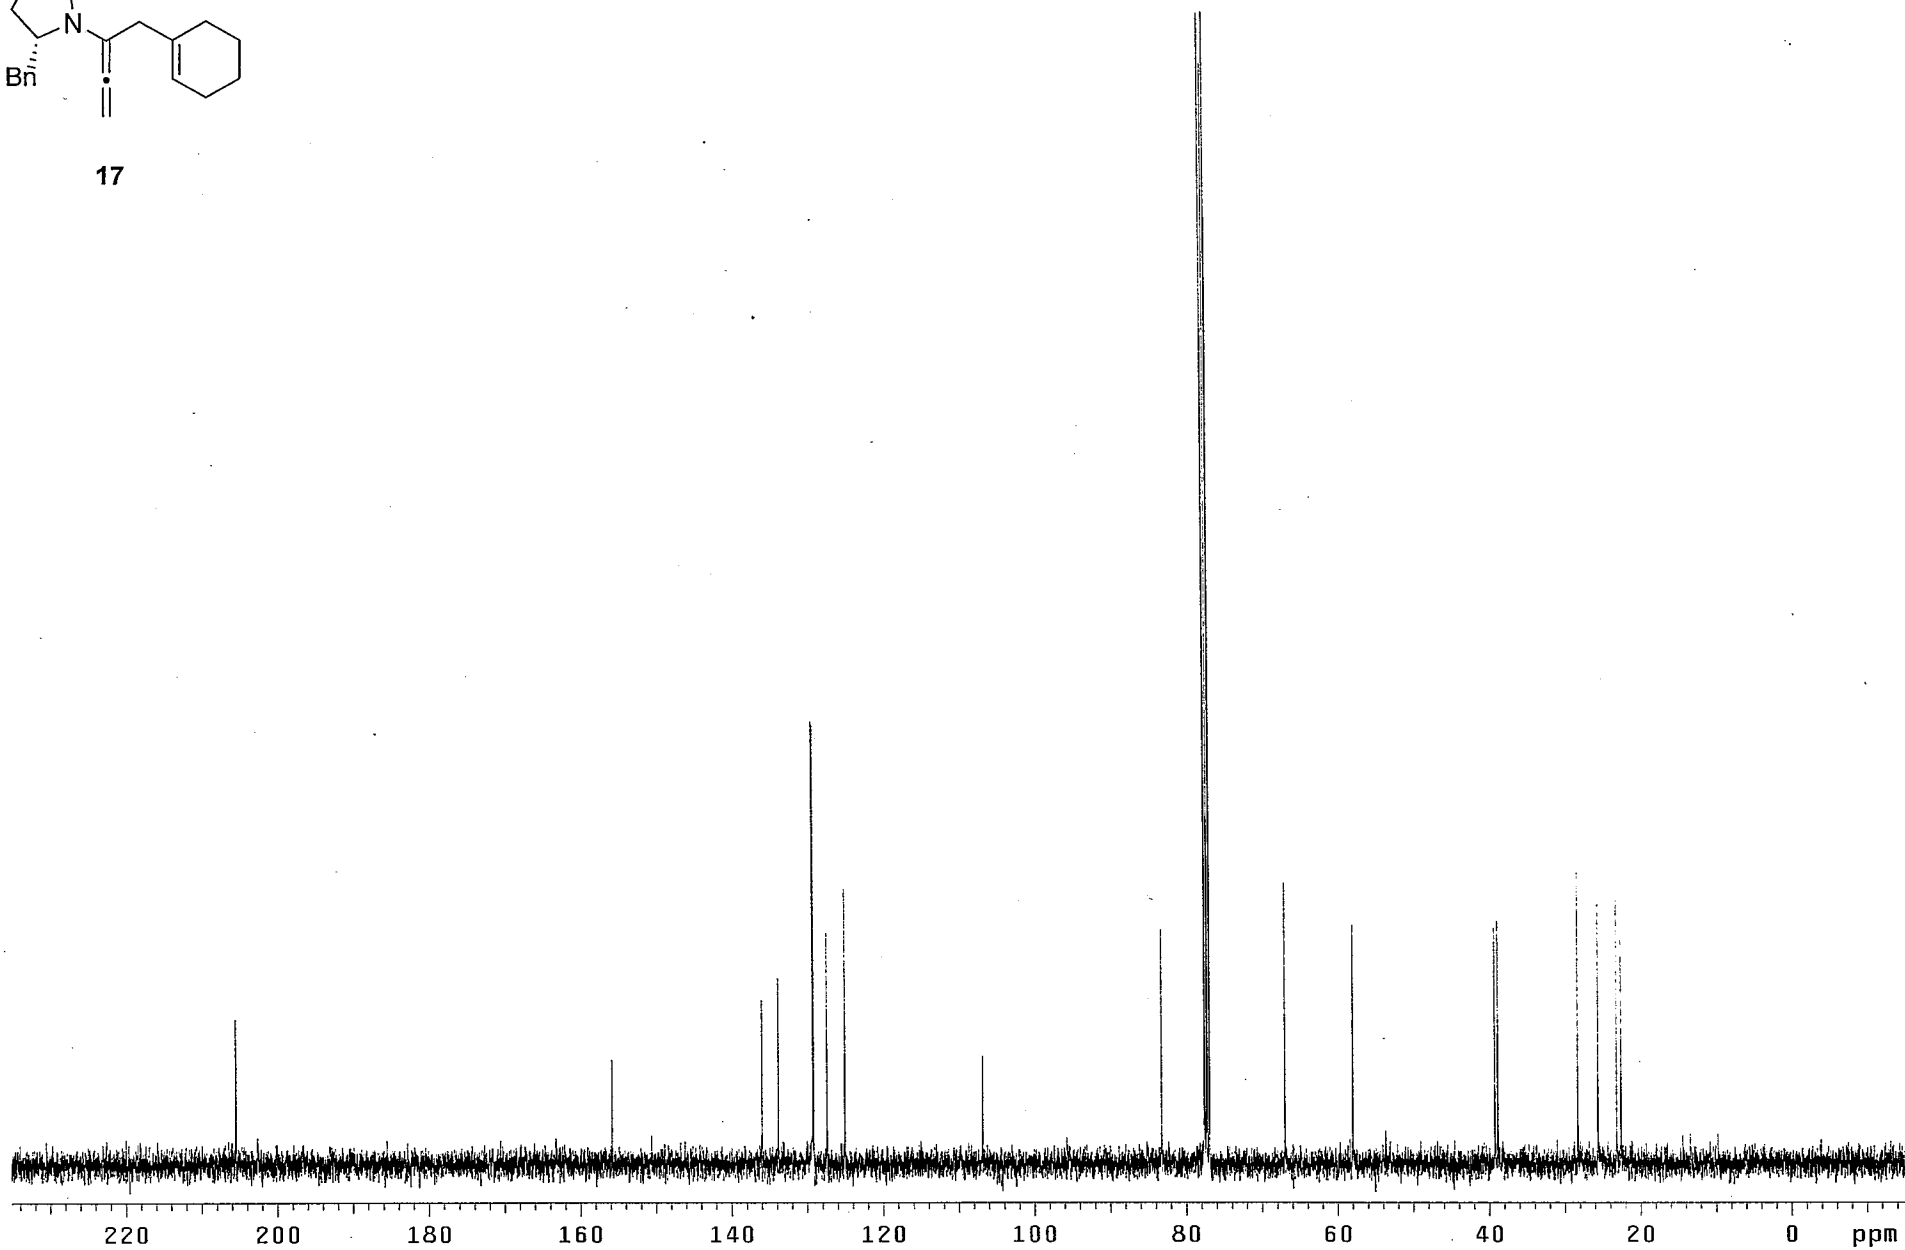



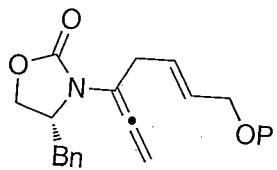

18a: P = TBDPS

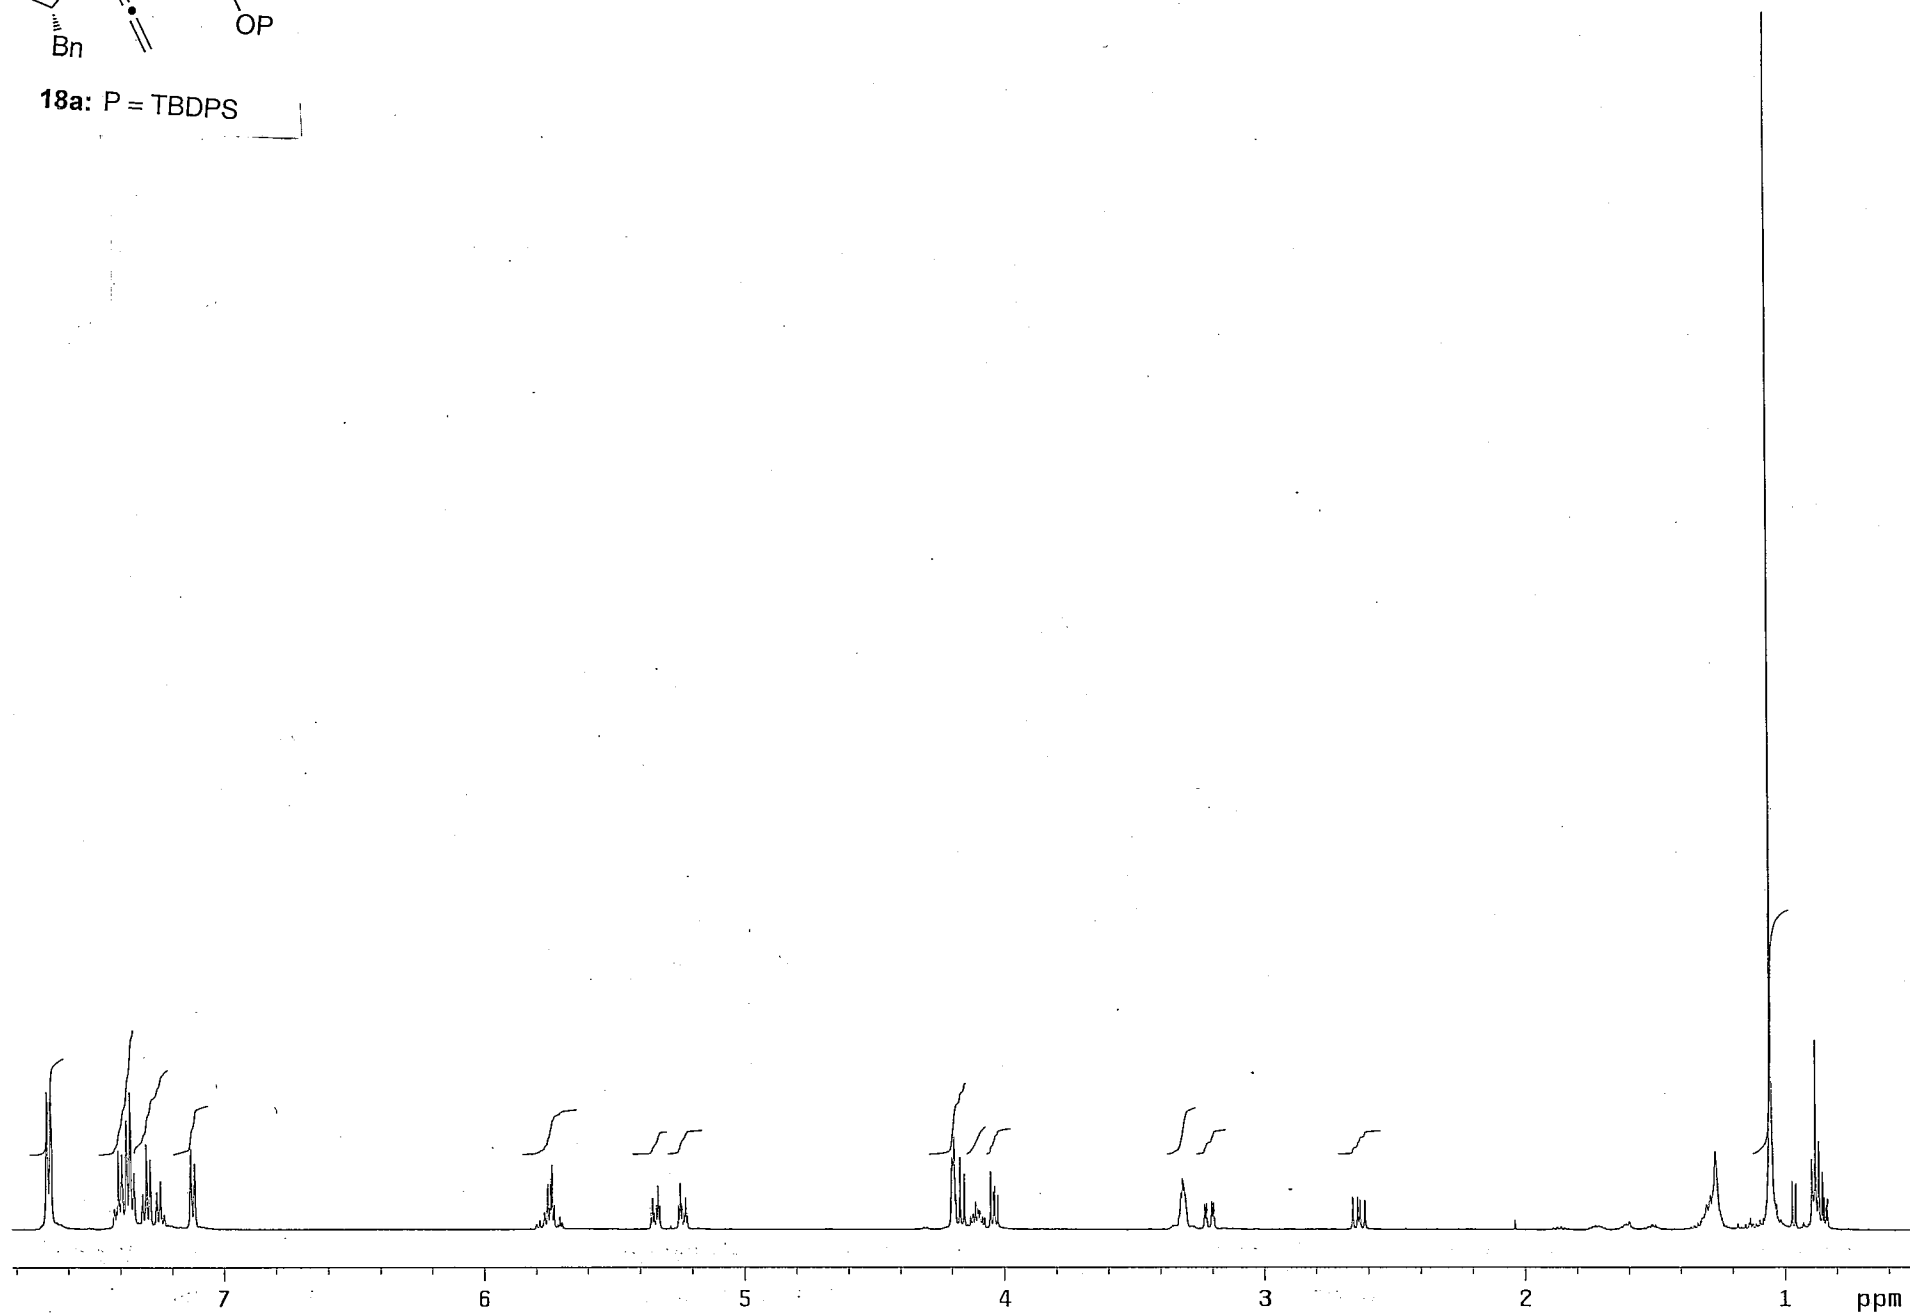

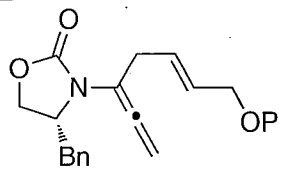

18a: P = TBDPS

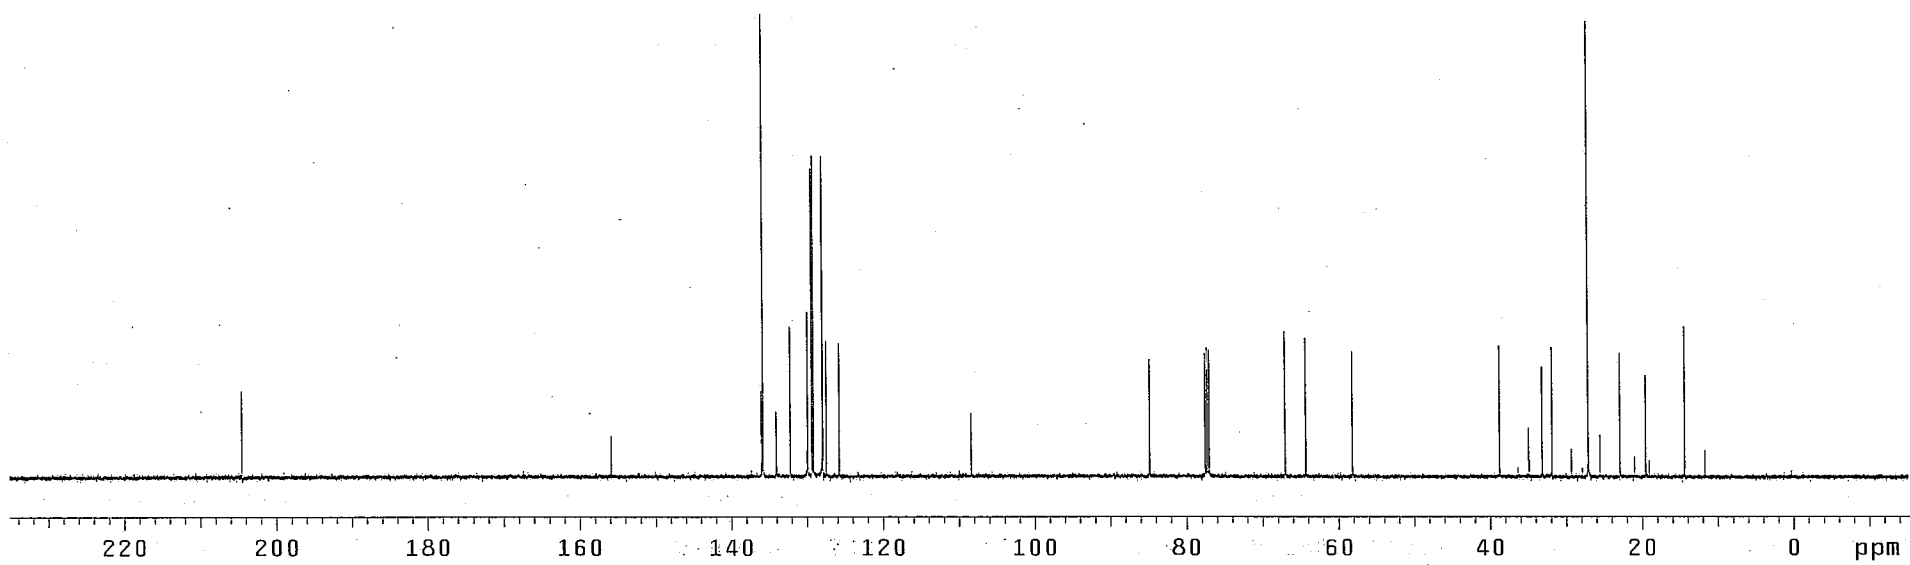

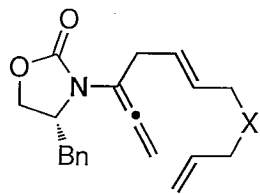

18b: X = O

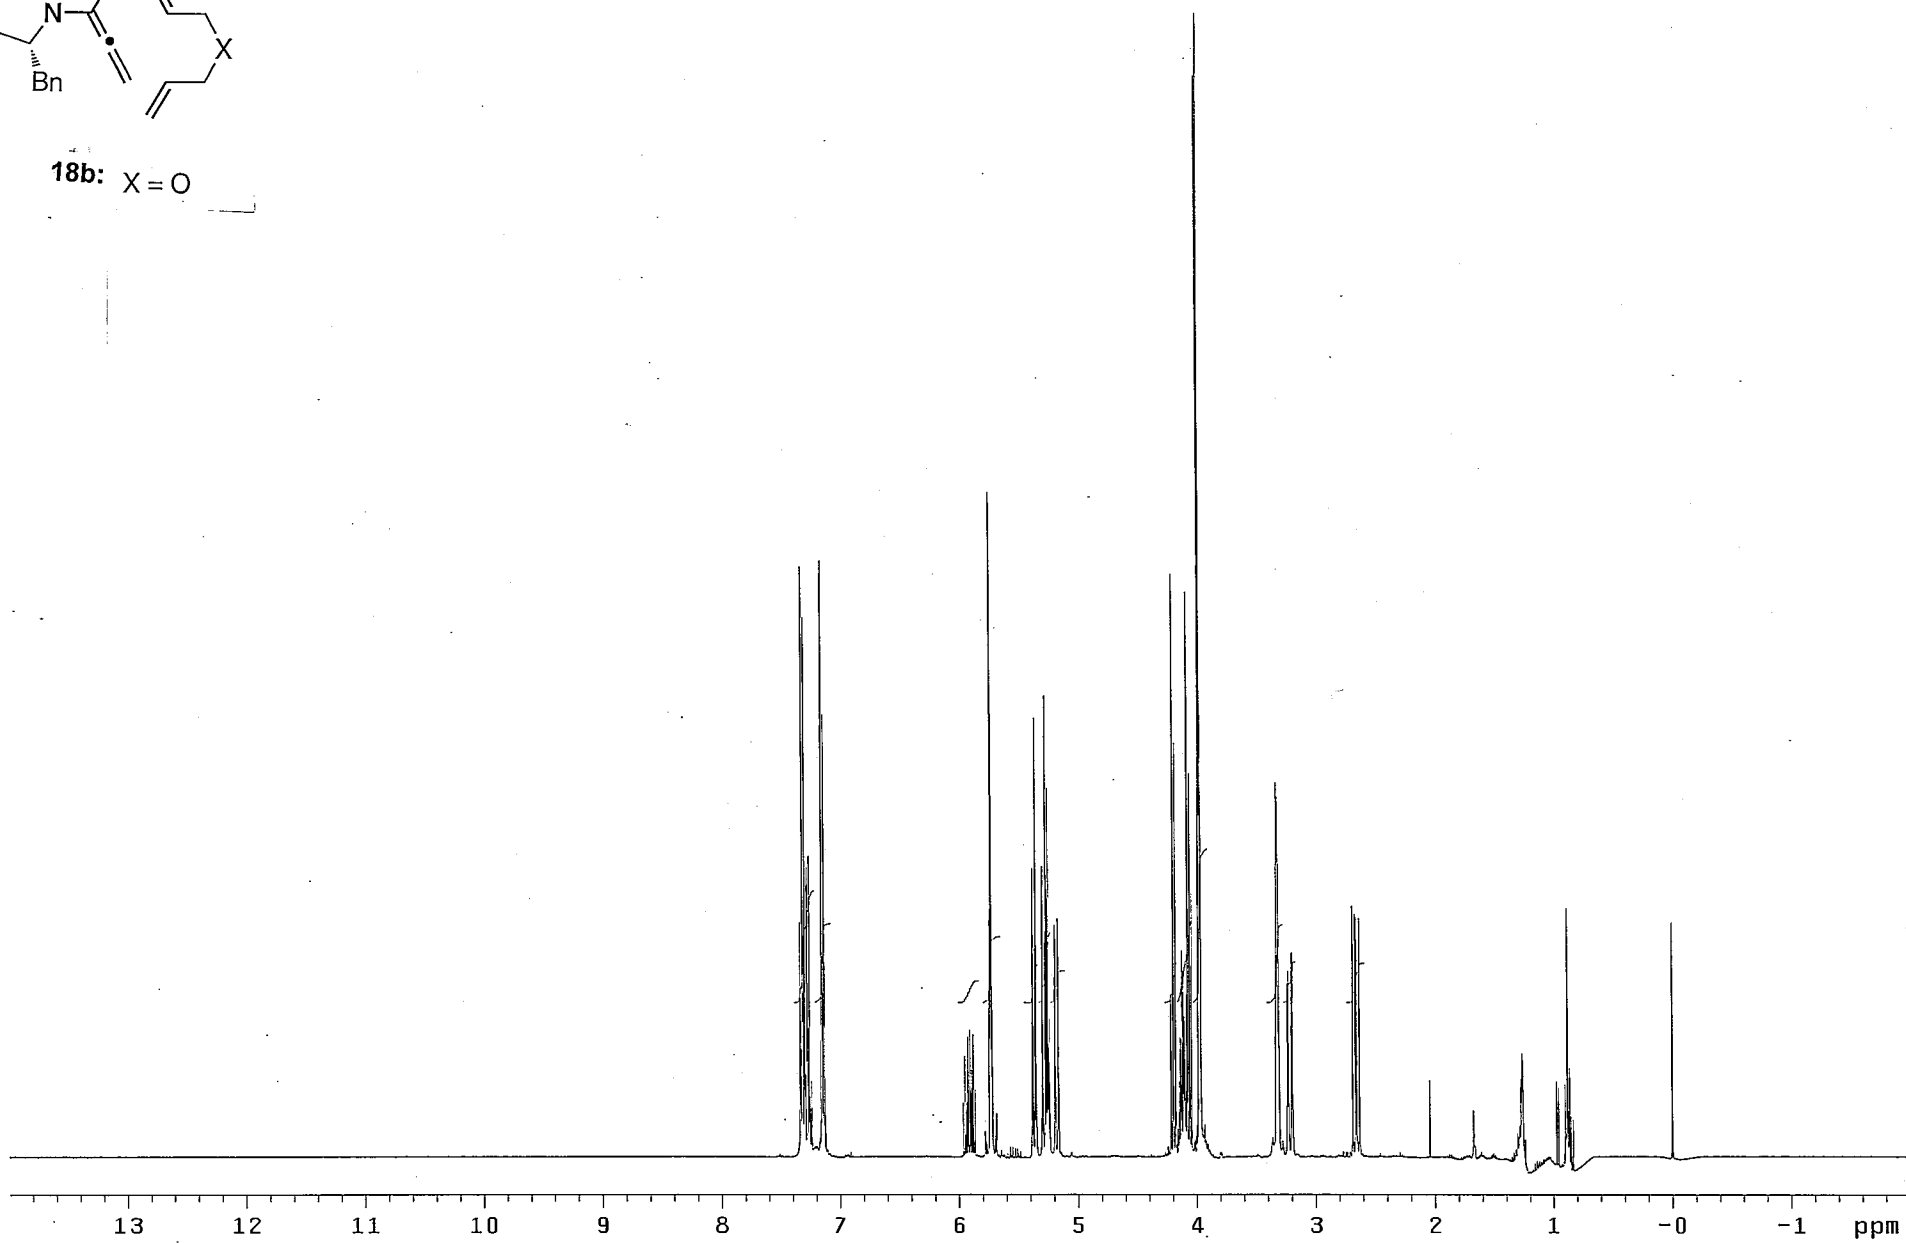

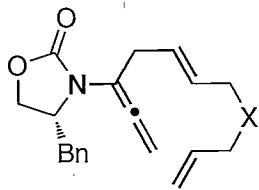

18b: X = O

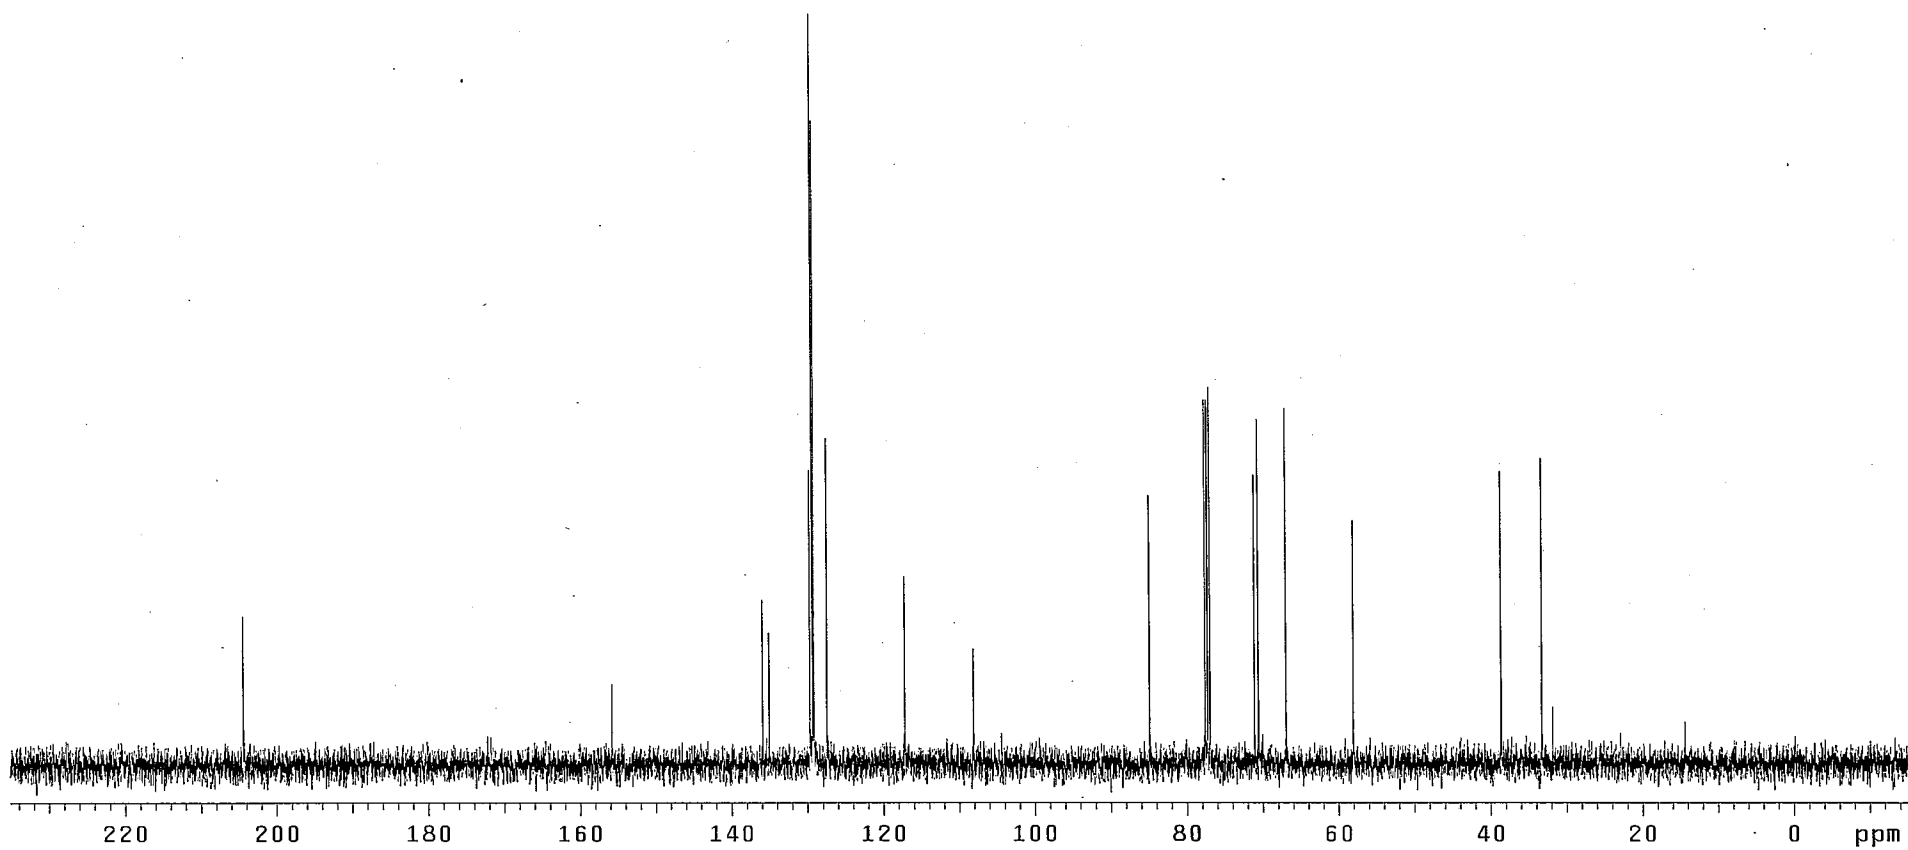

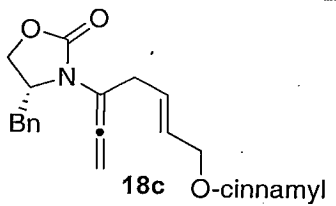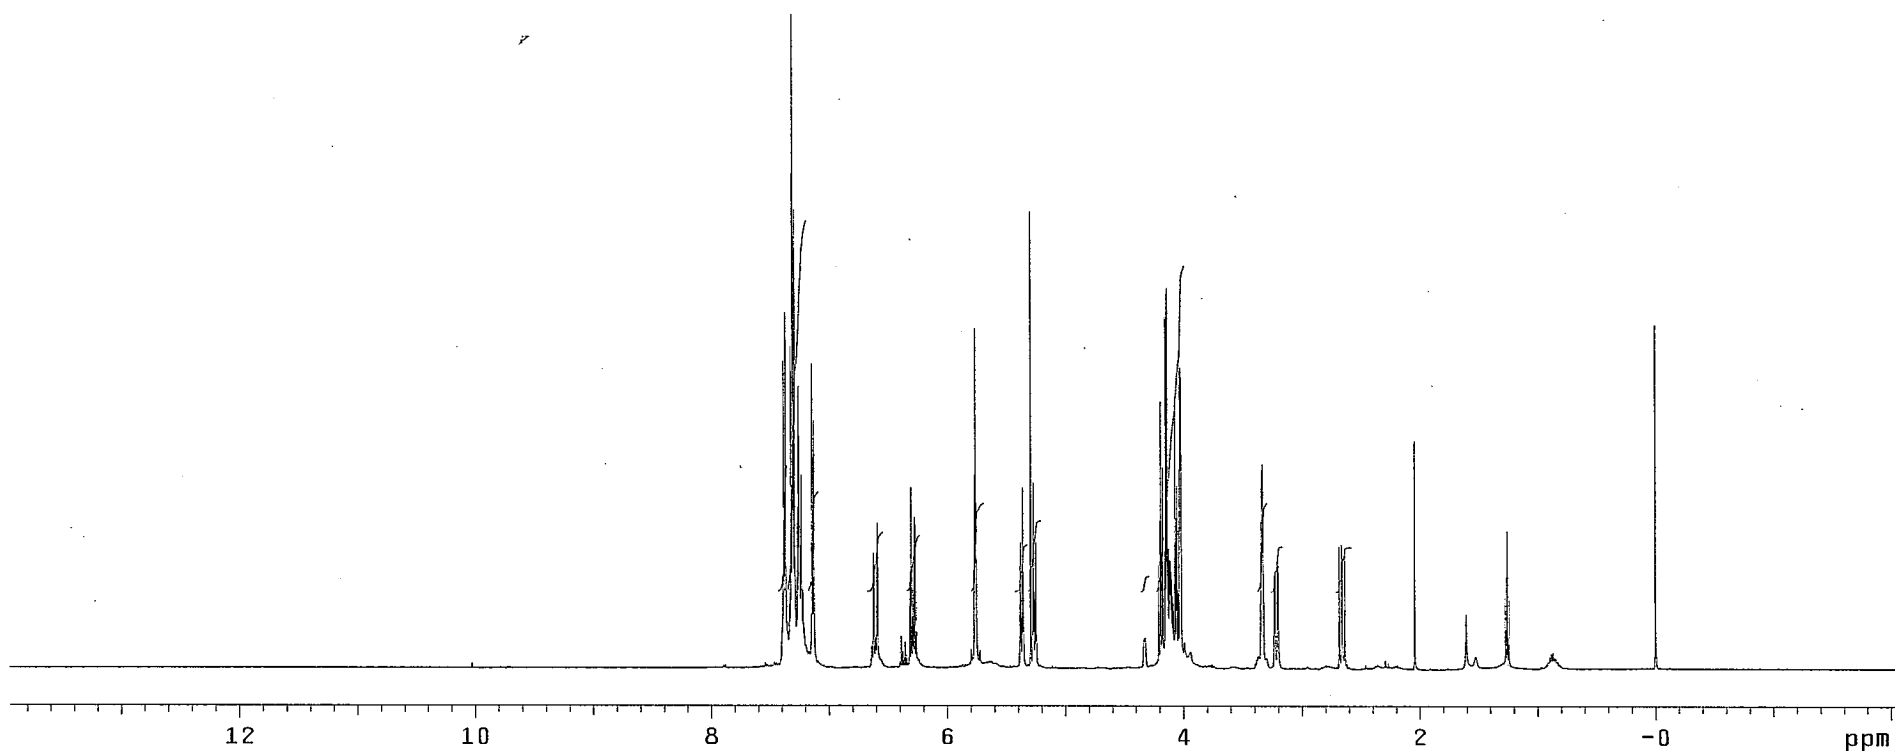

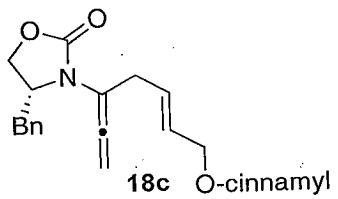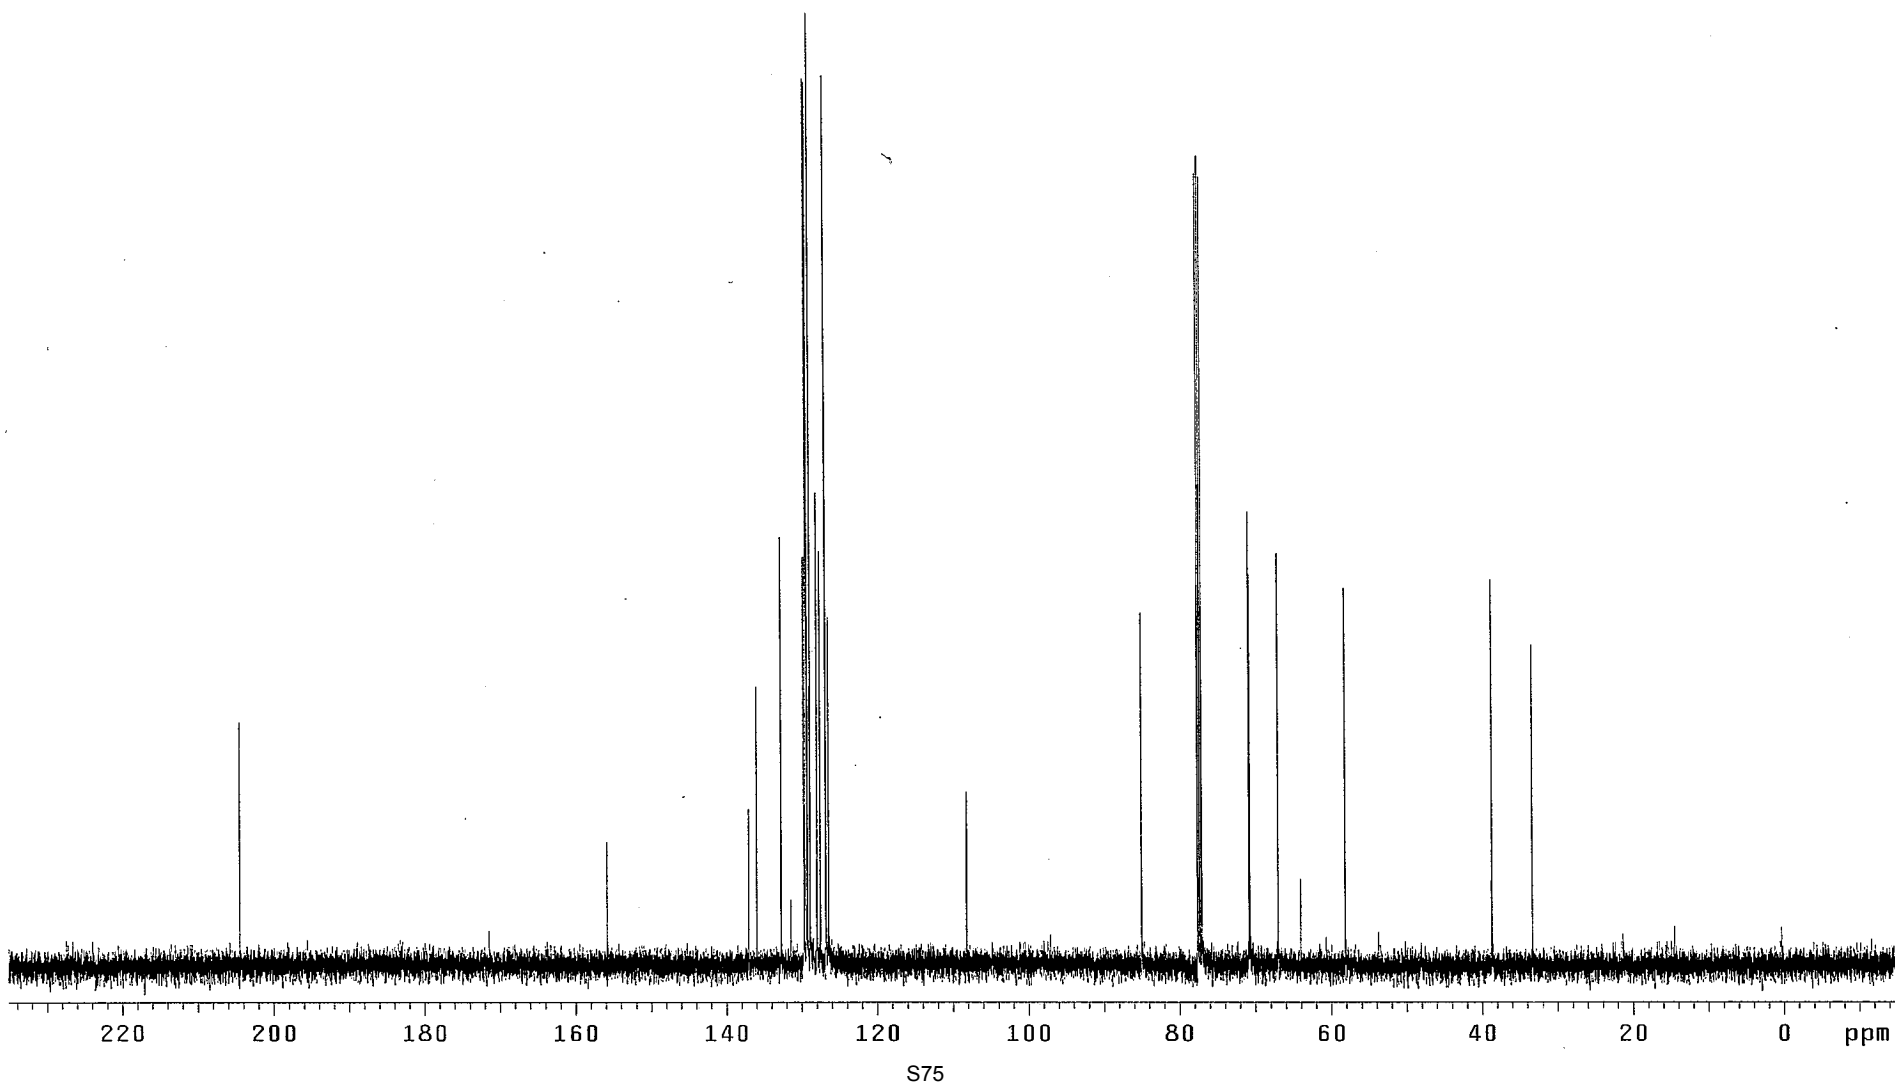

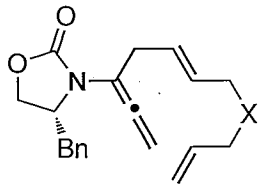

19: X = NTs

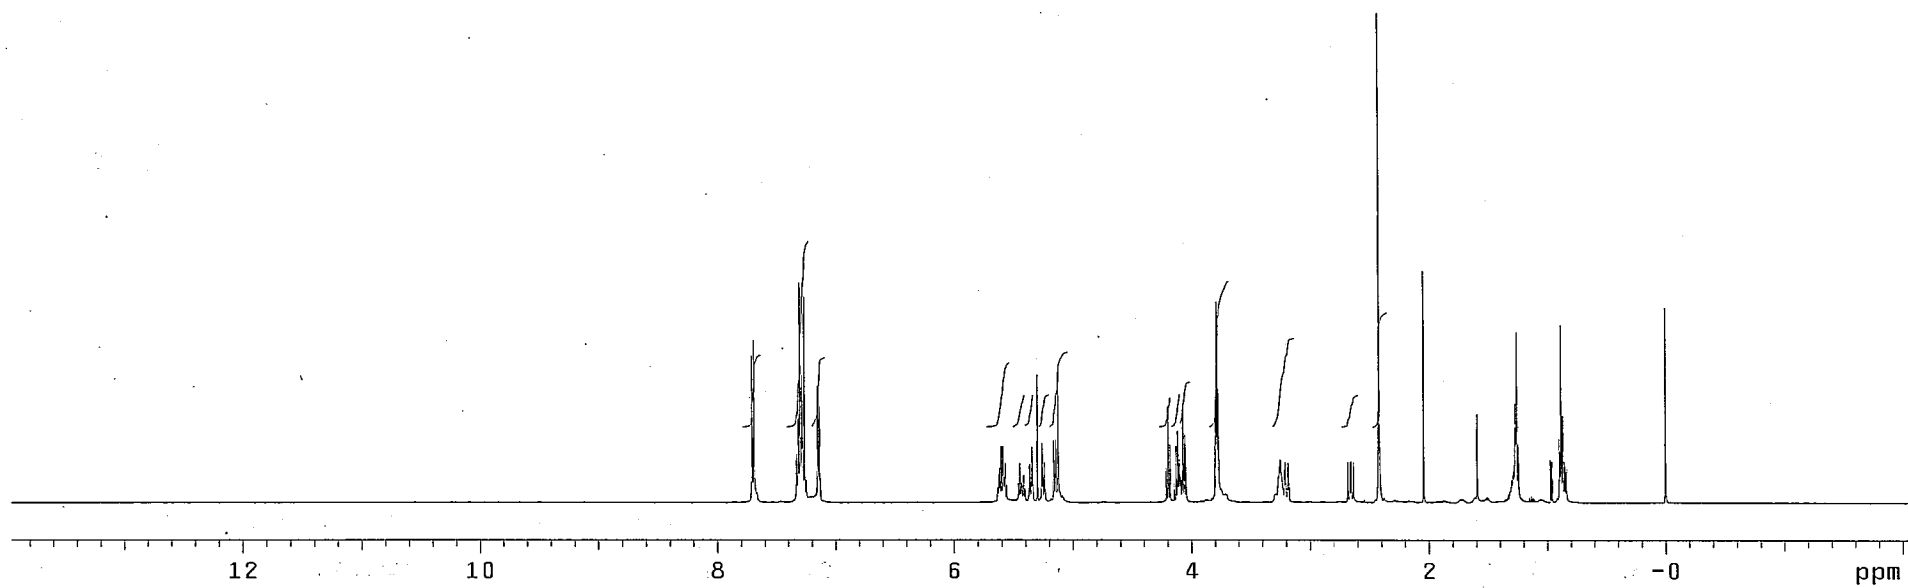

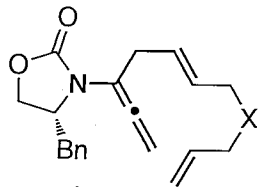

19: X = NTs

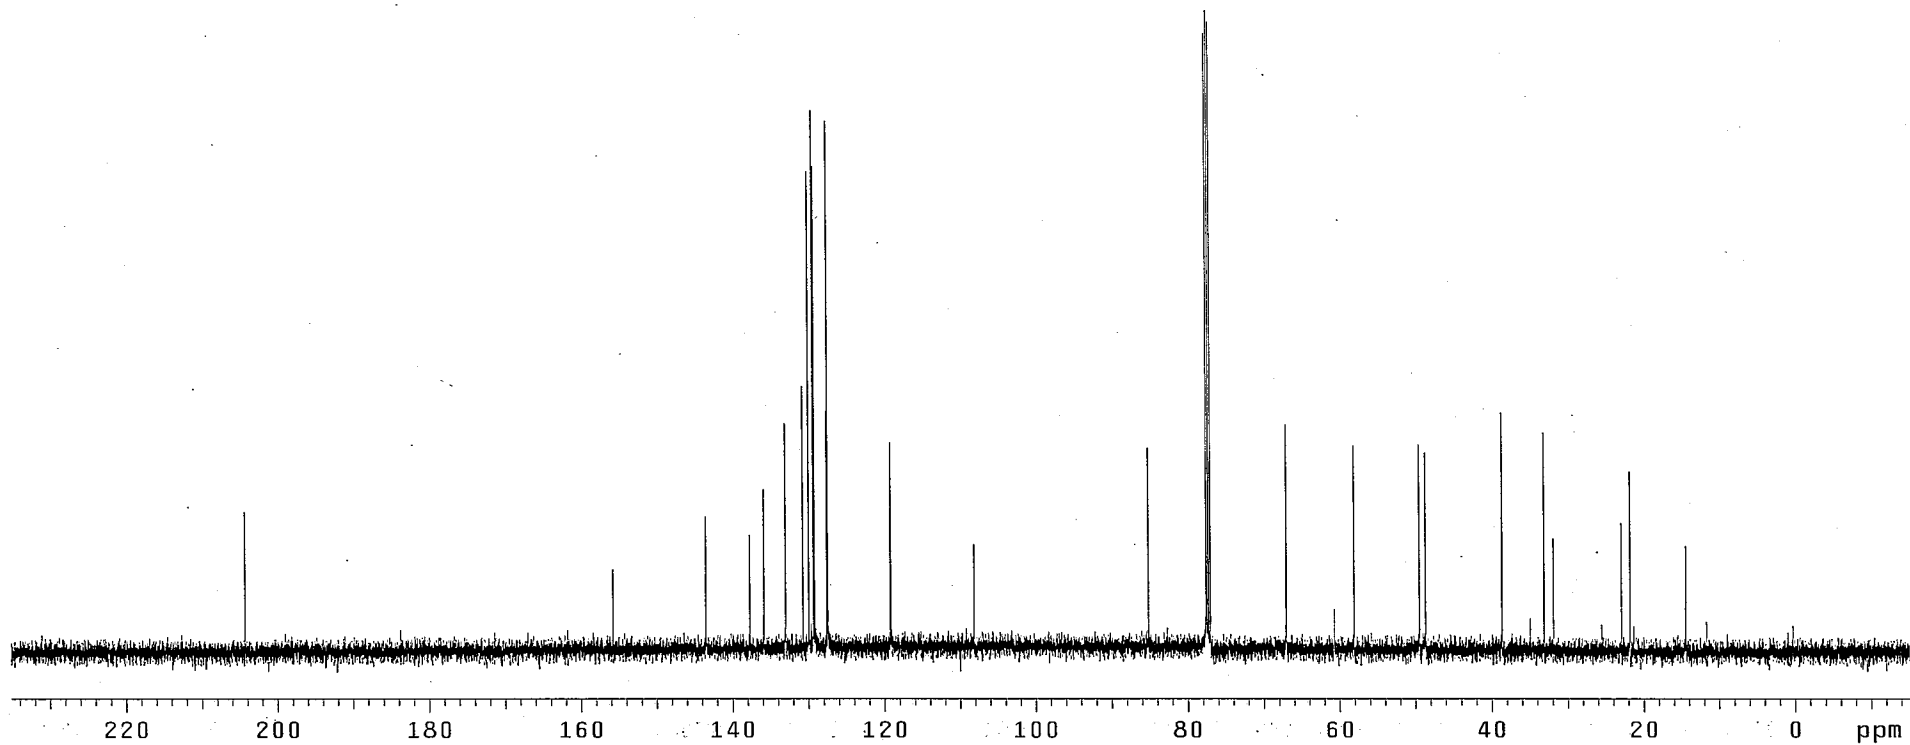



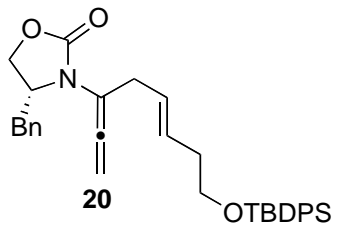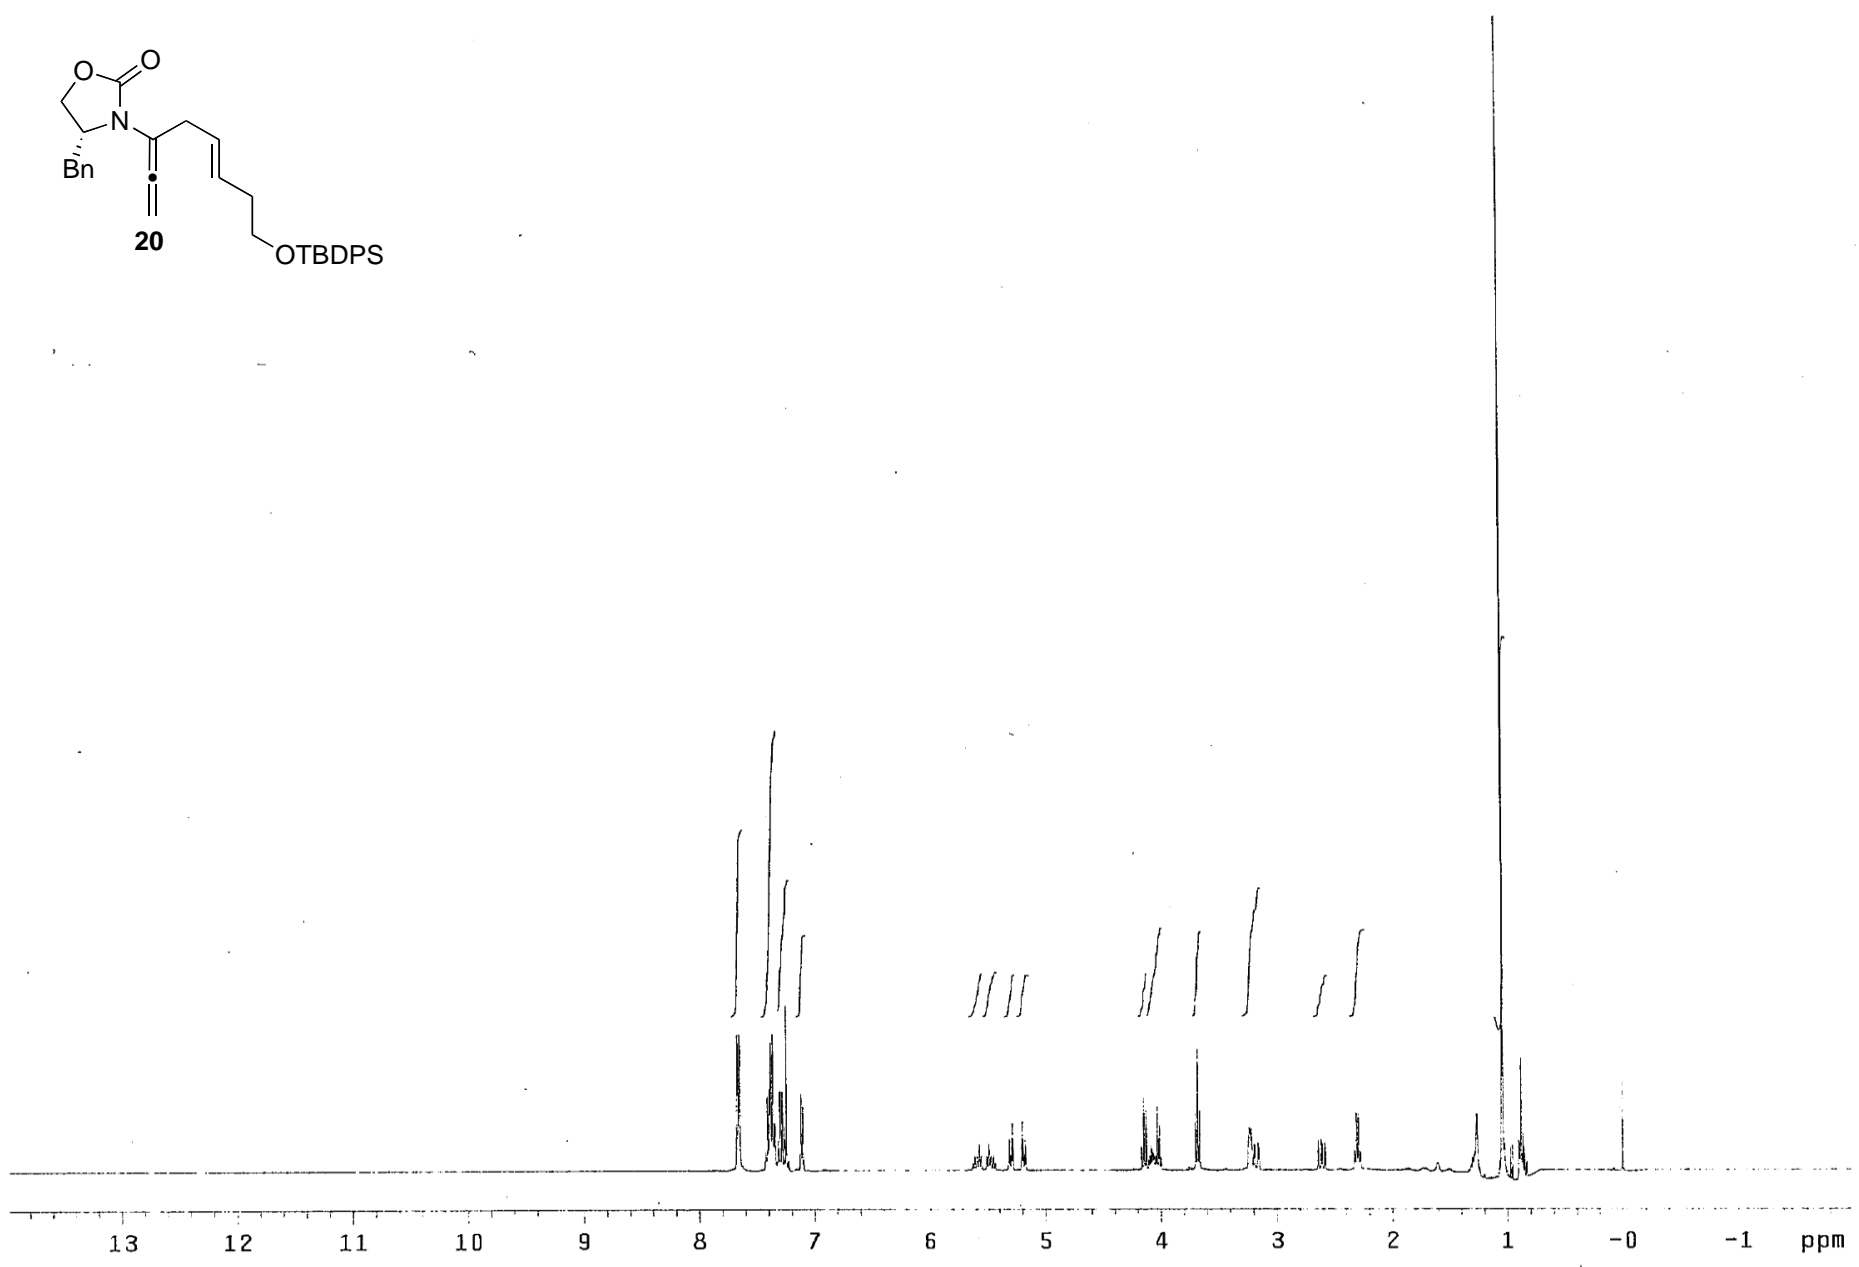

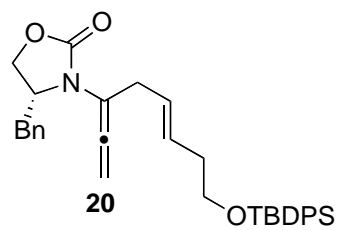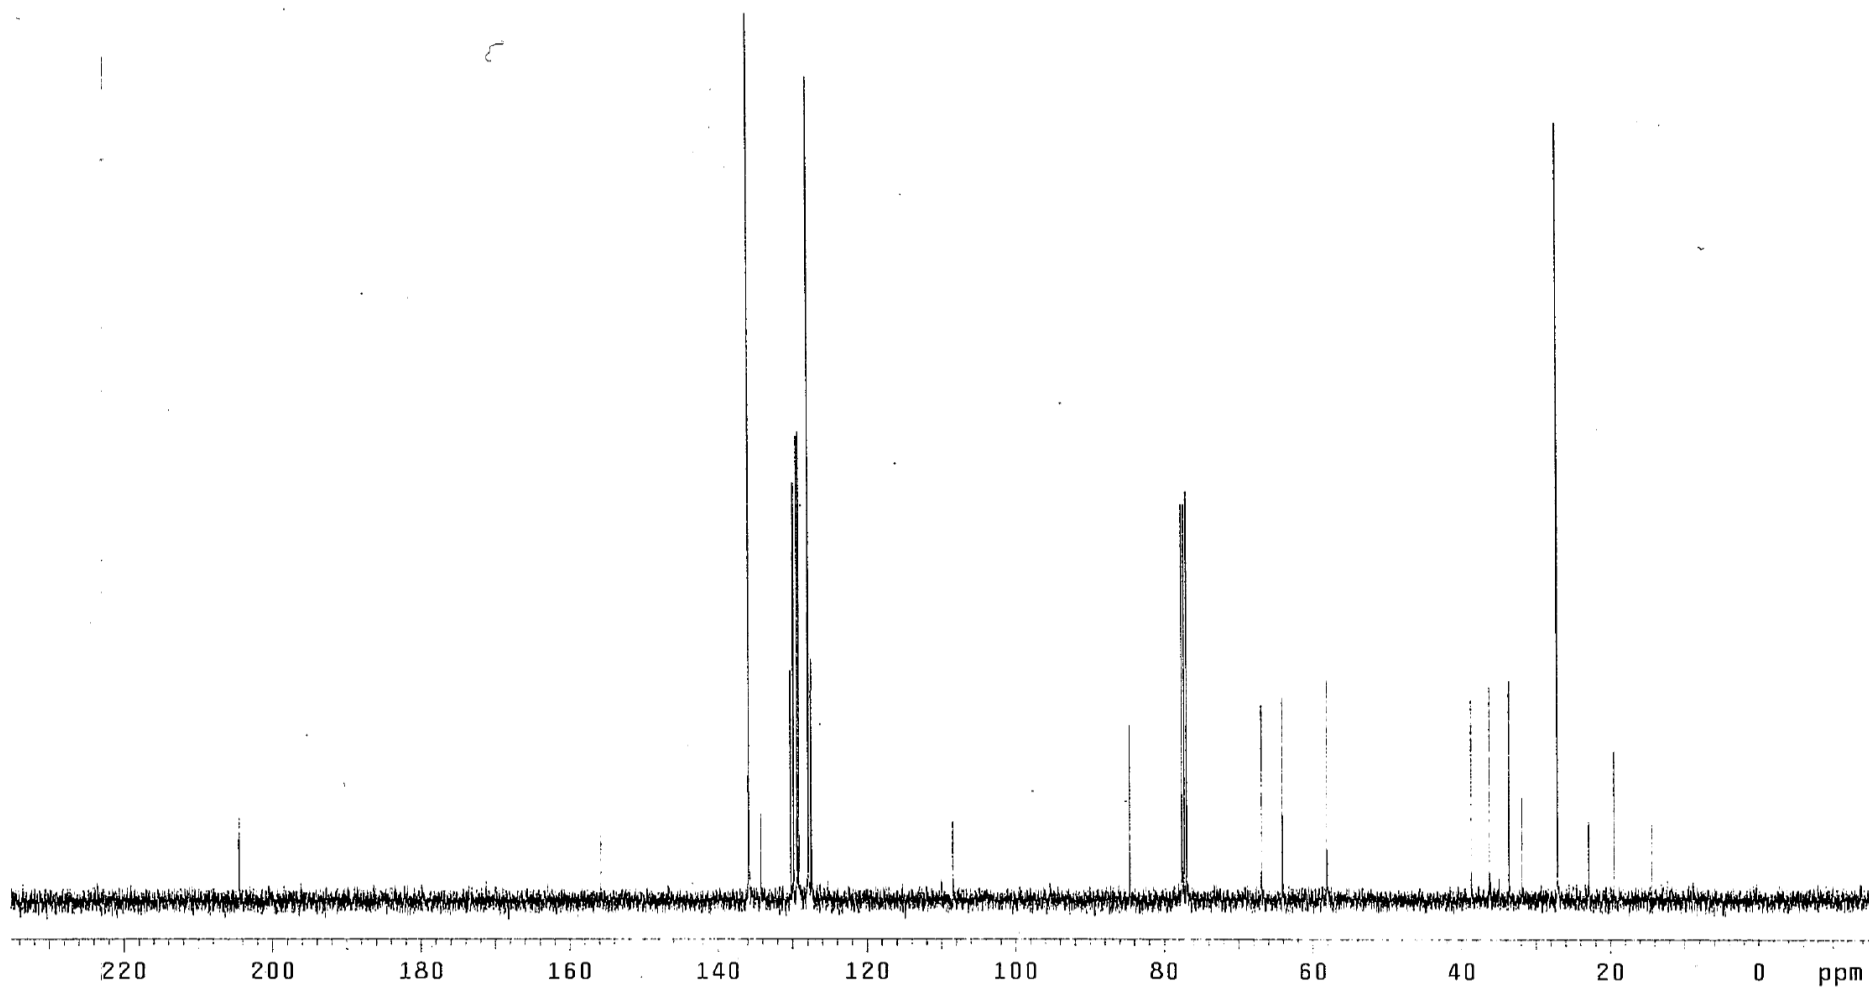

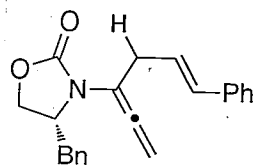

21

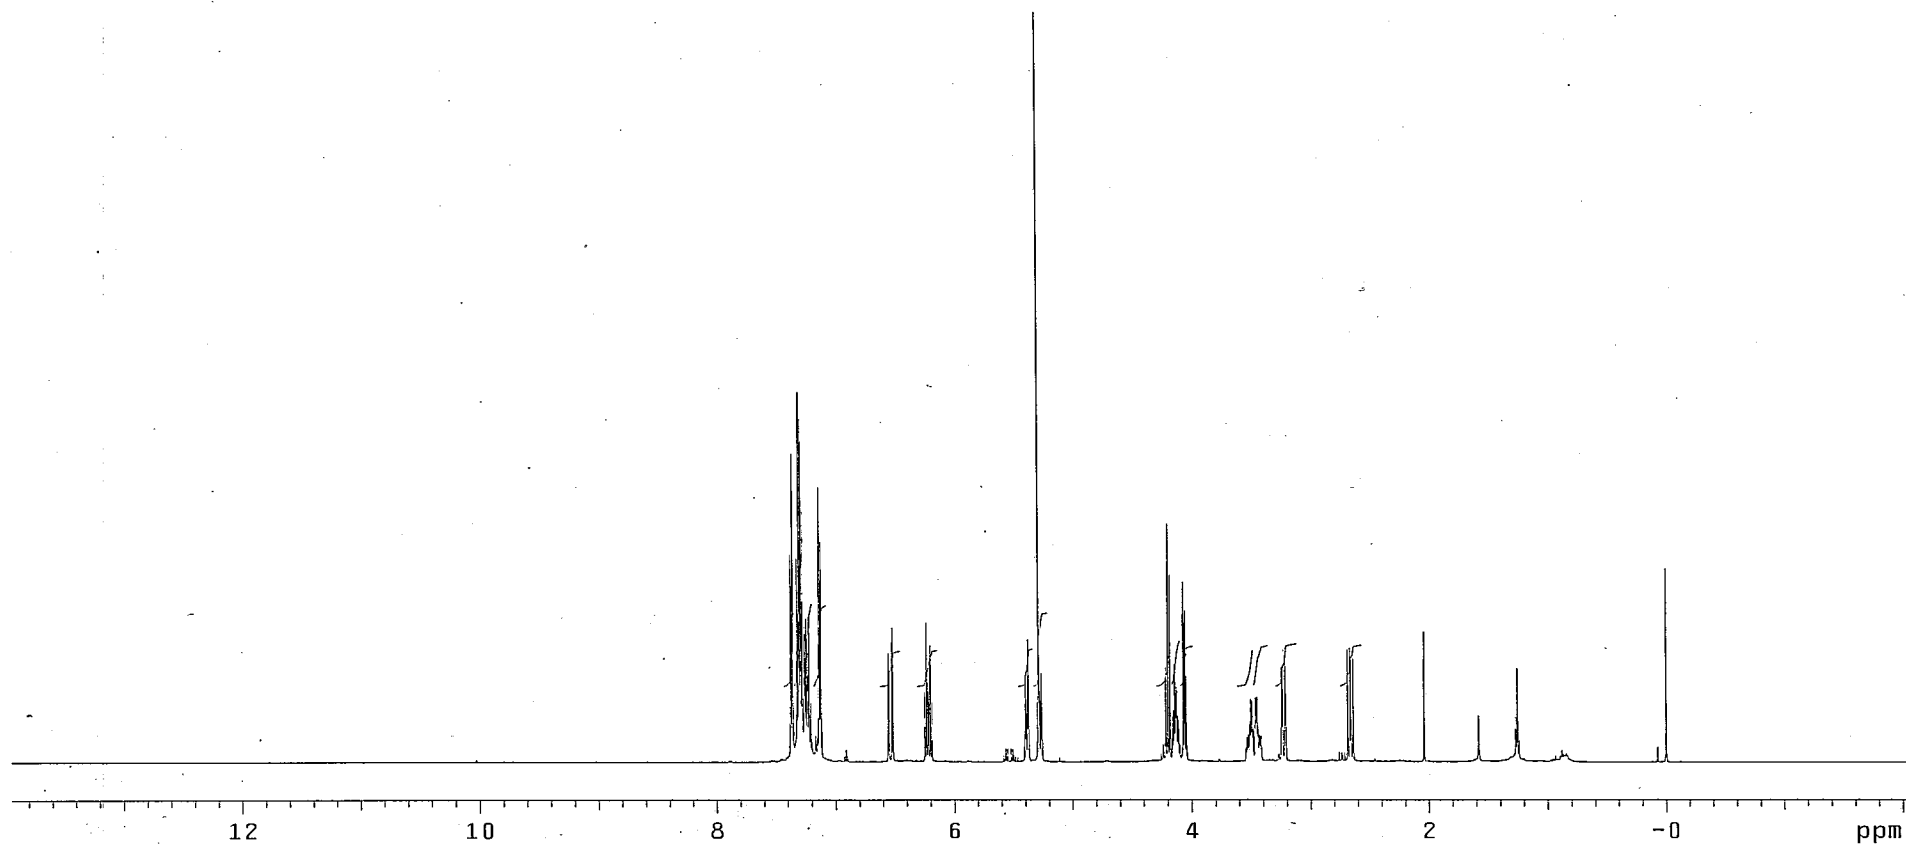

S80

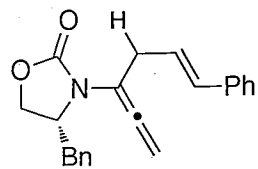

21

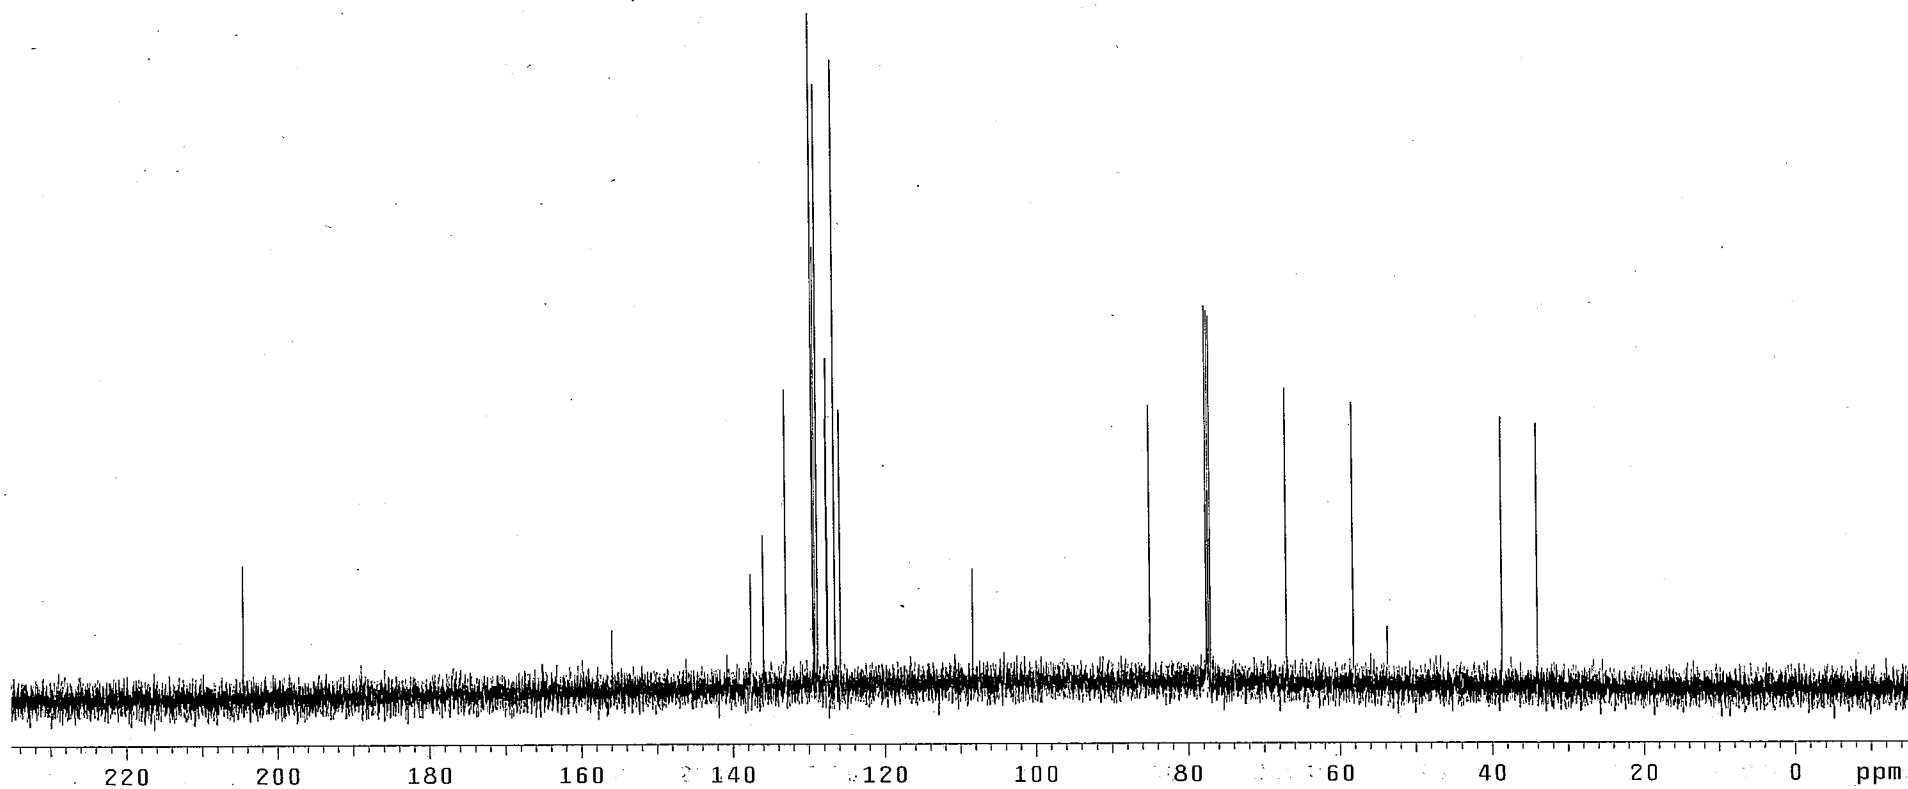

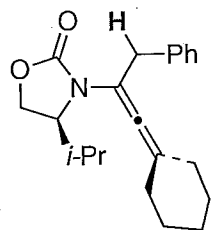

29a

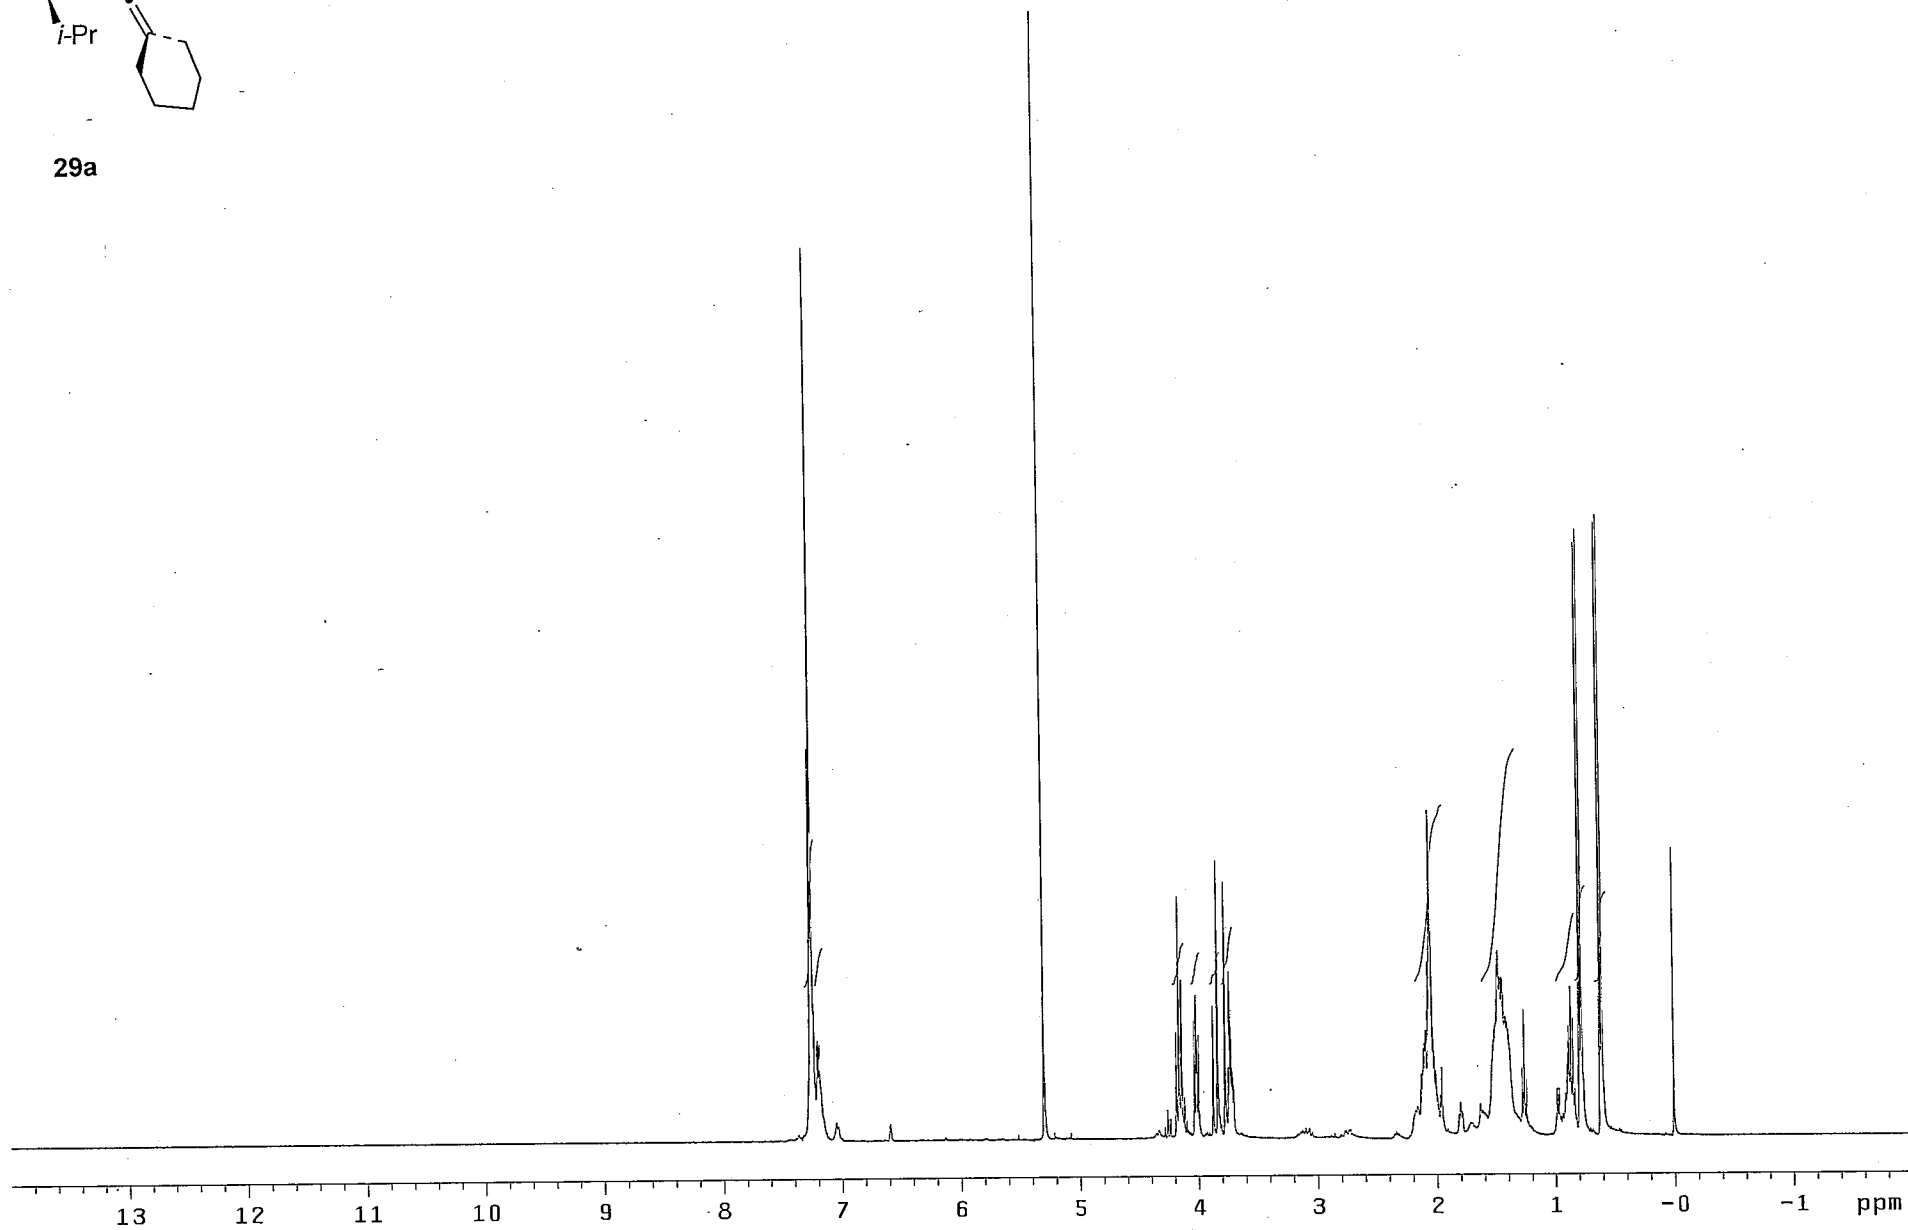

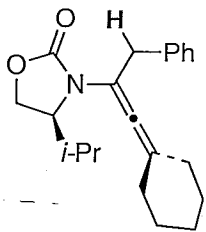

29a

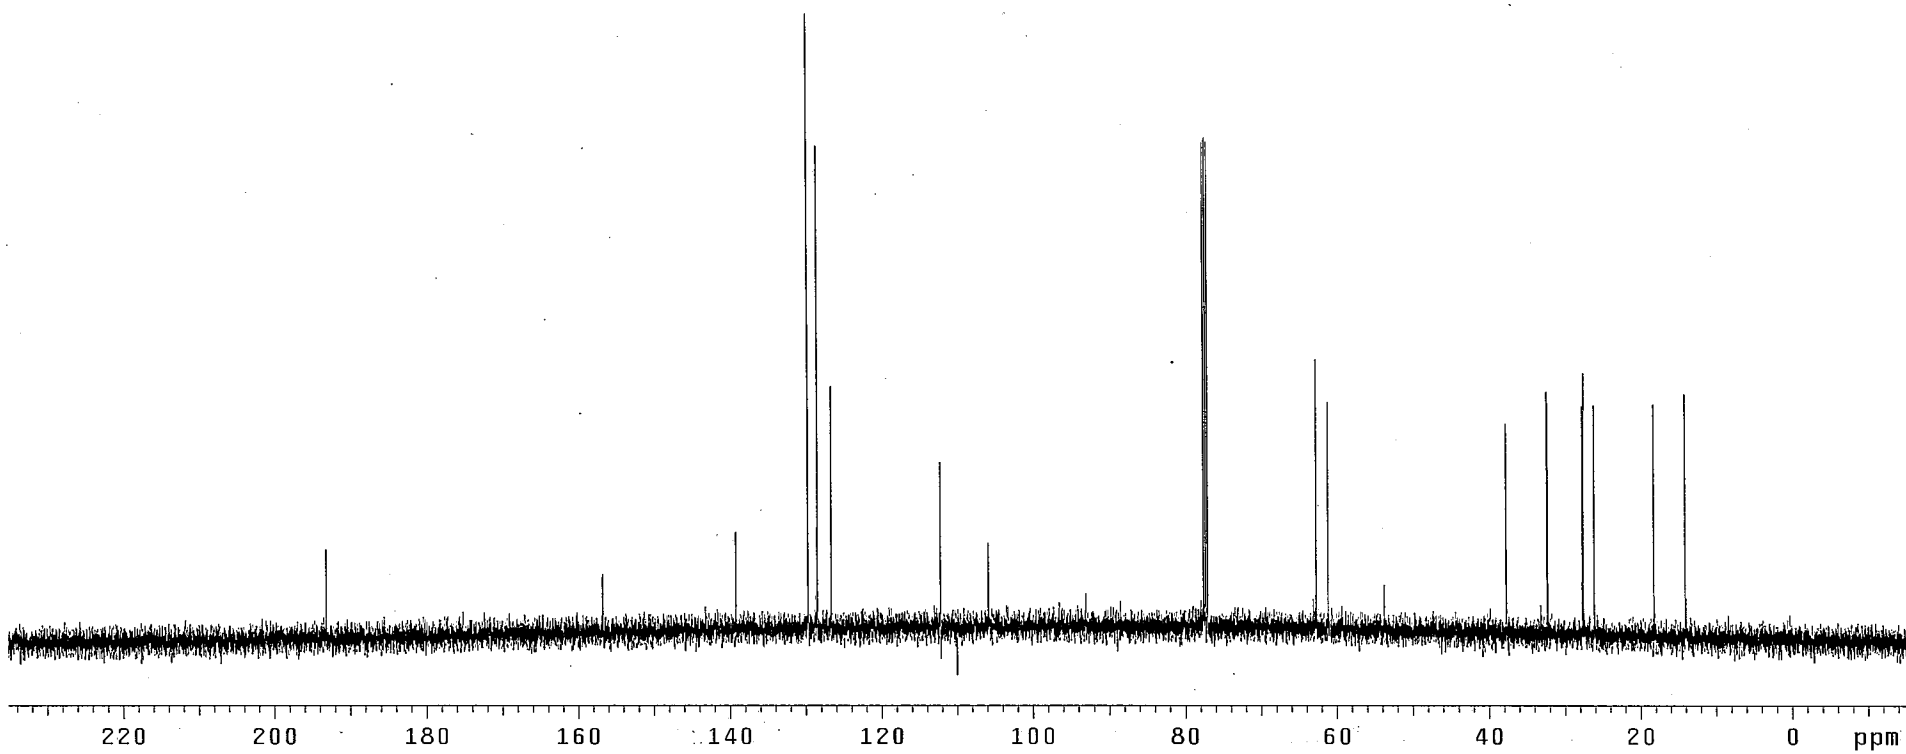

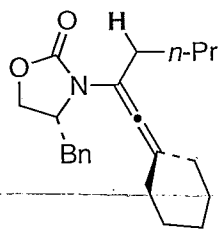

30

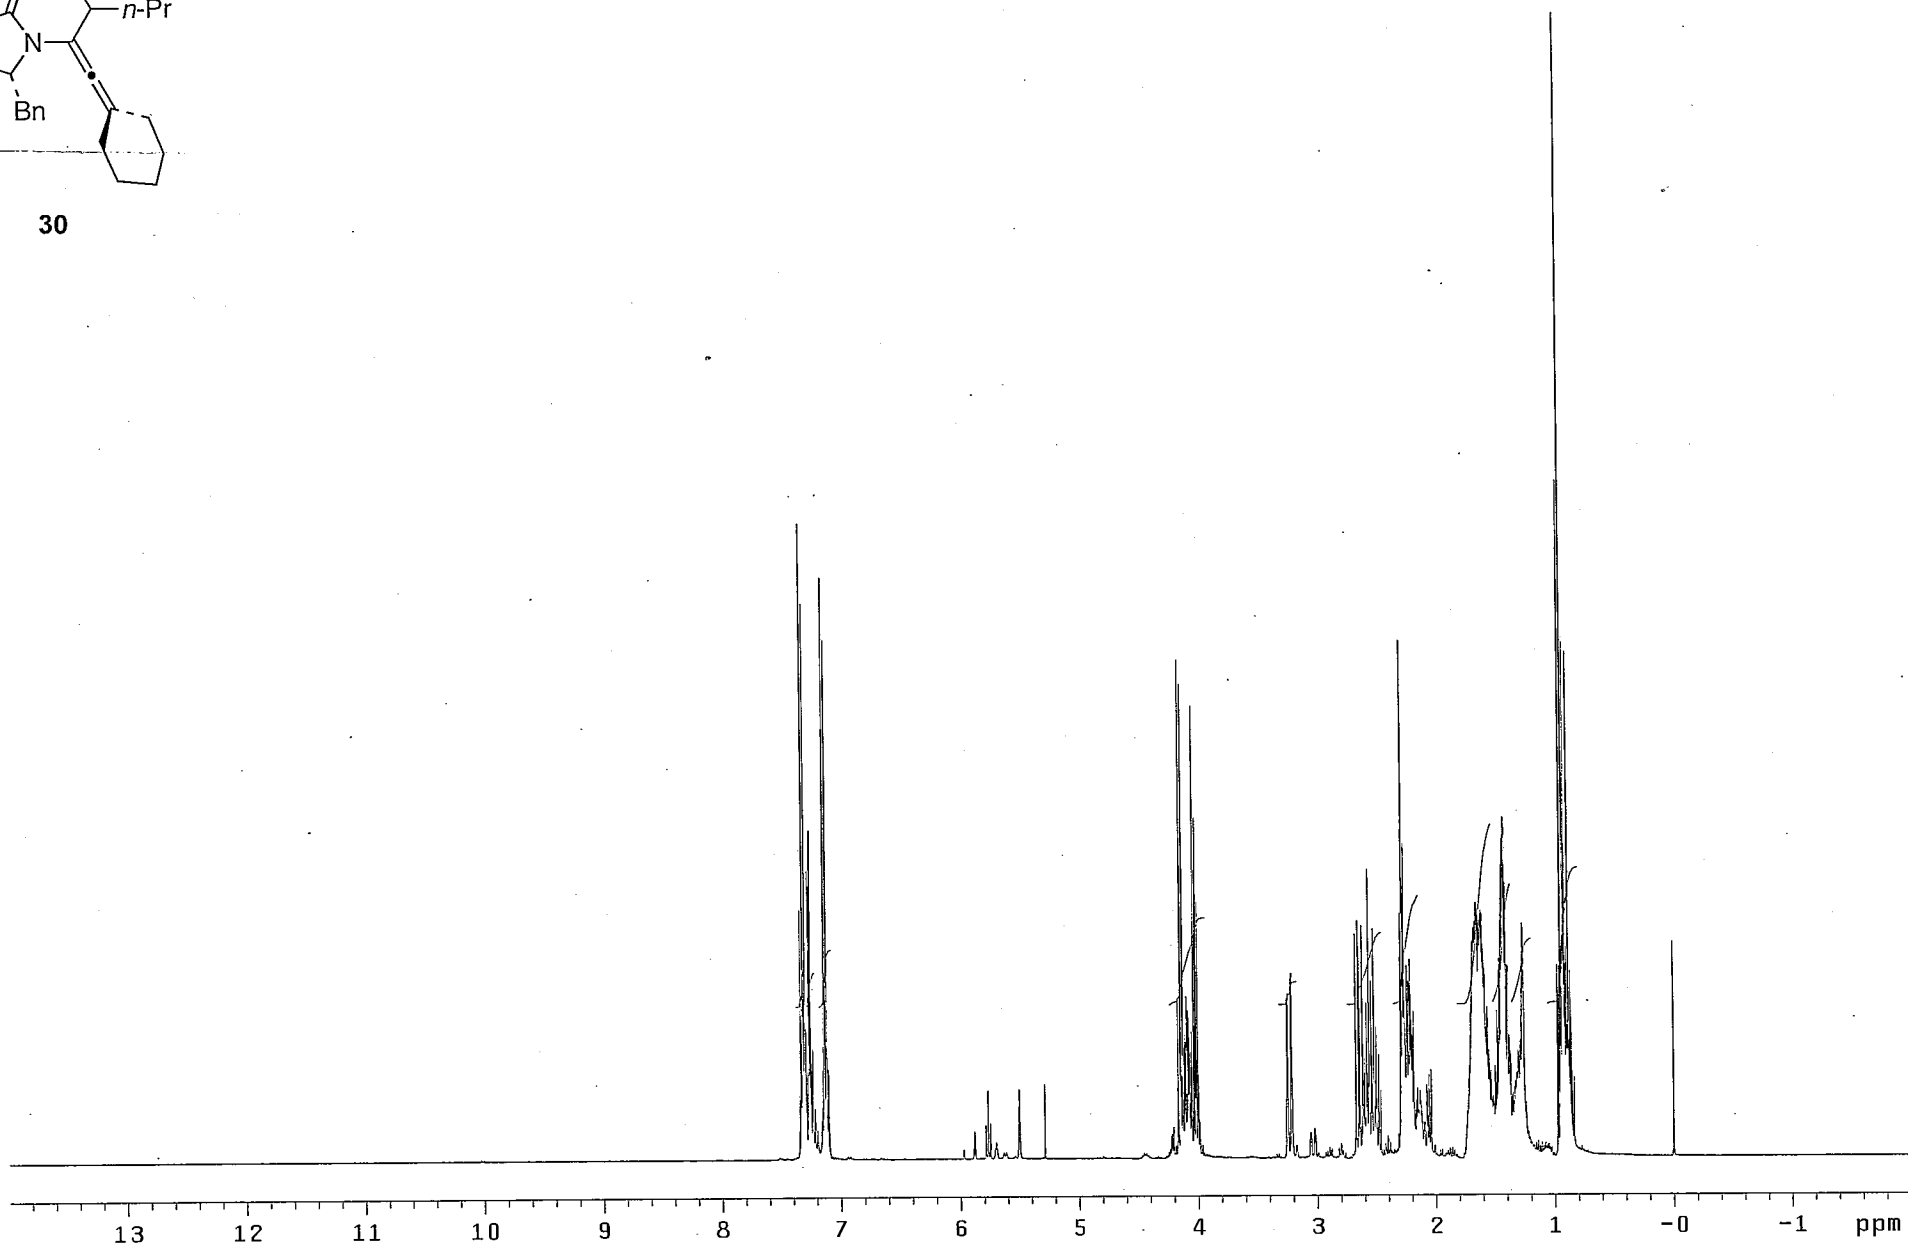

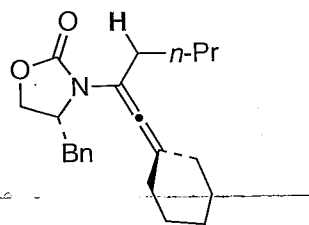

30

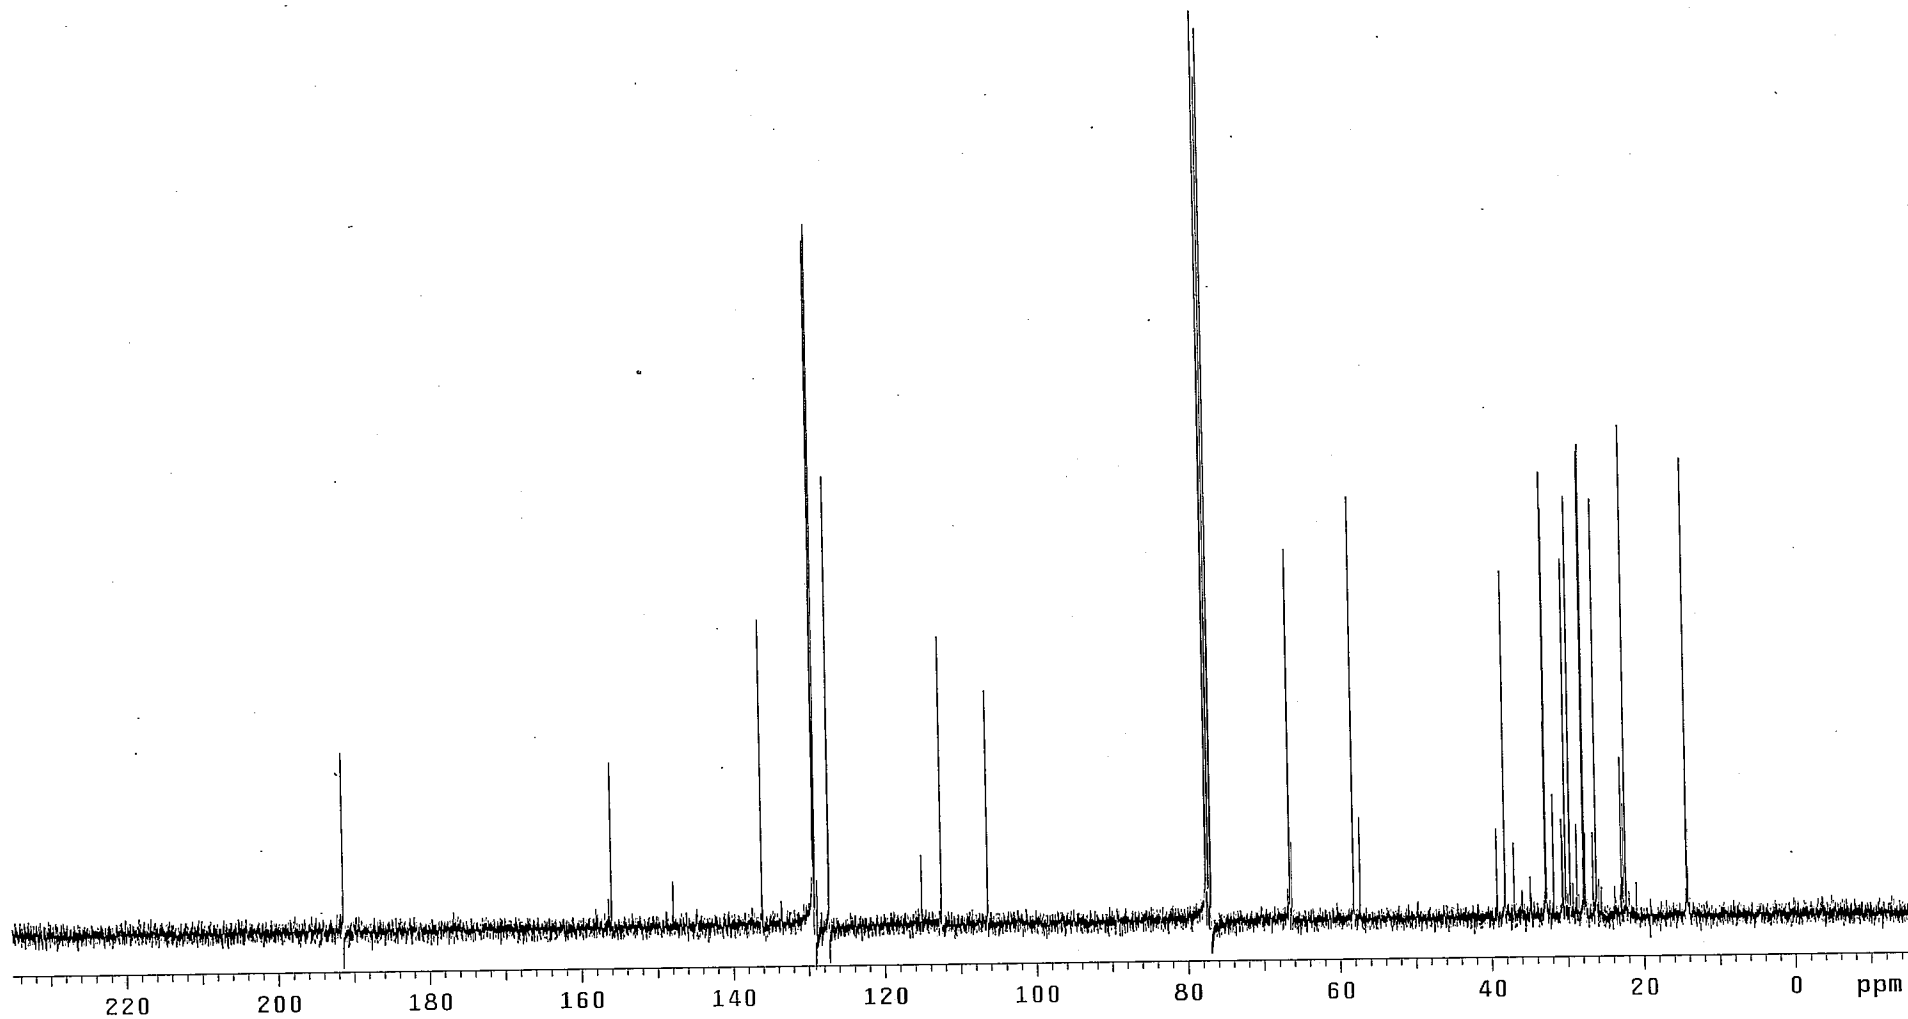



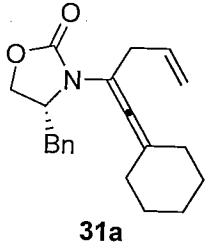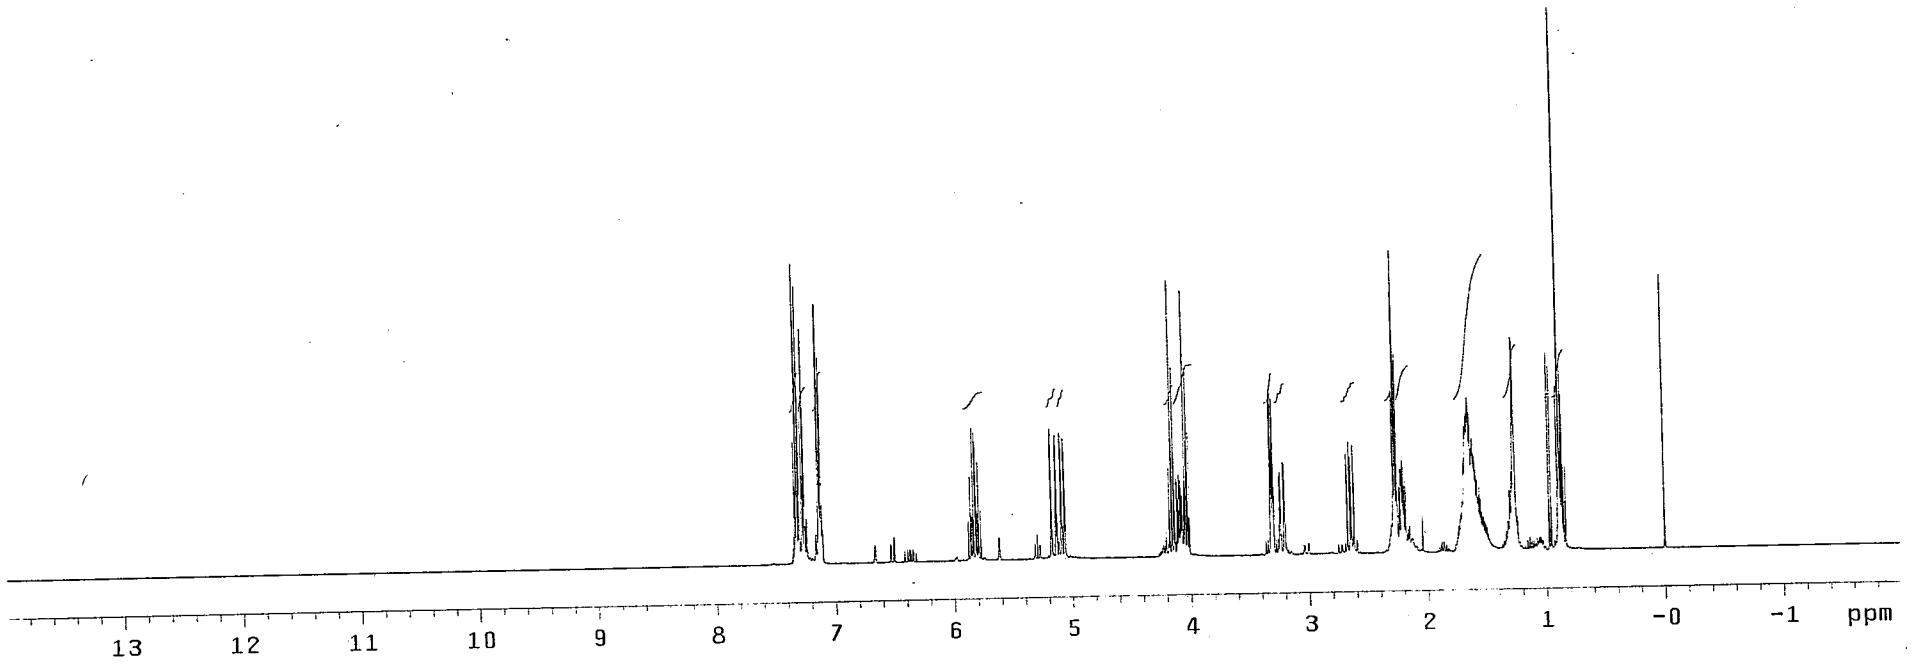

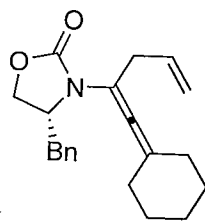

31a

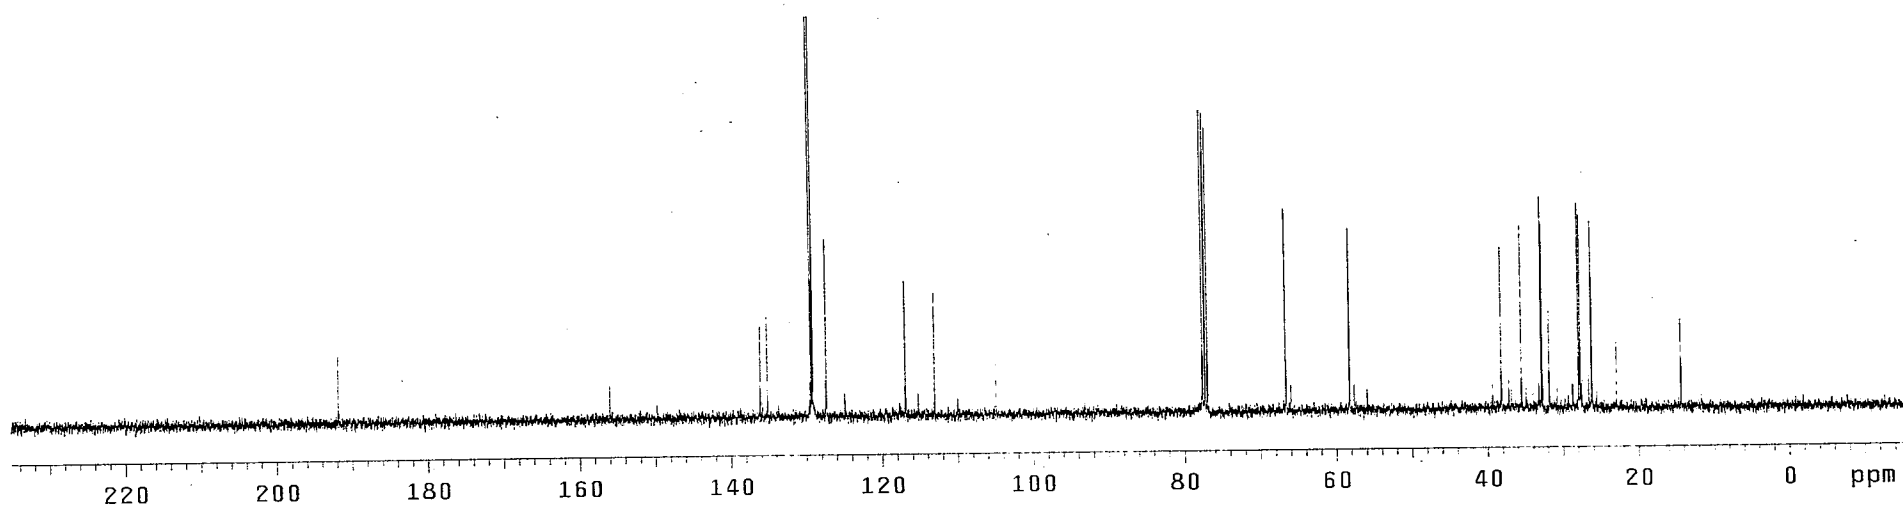

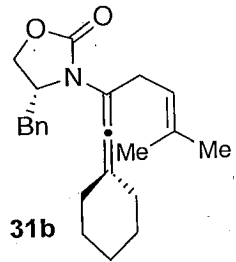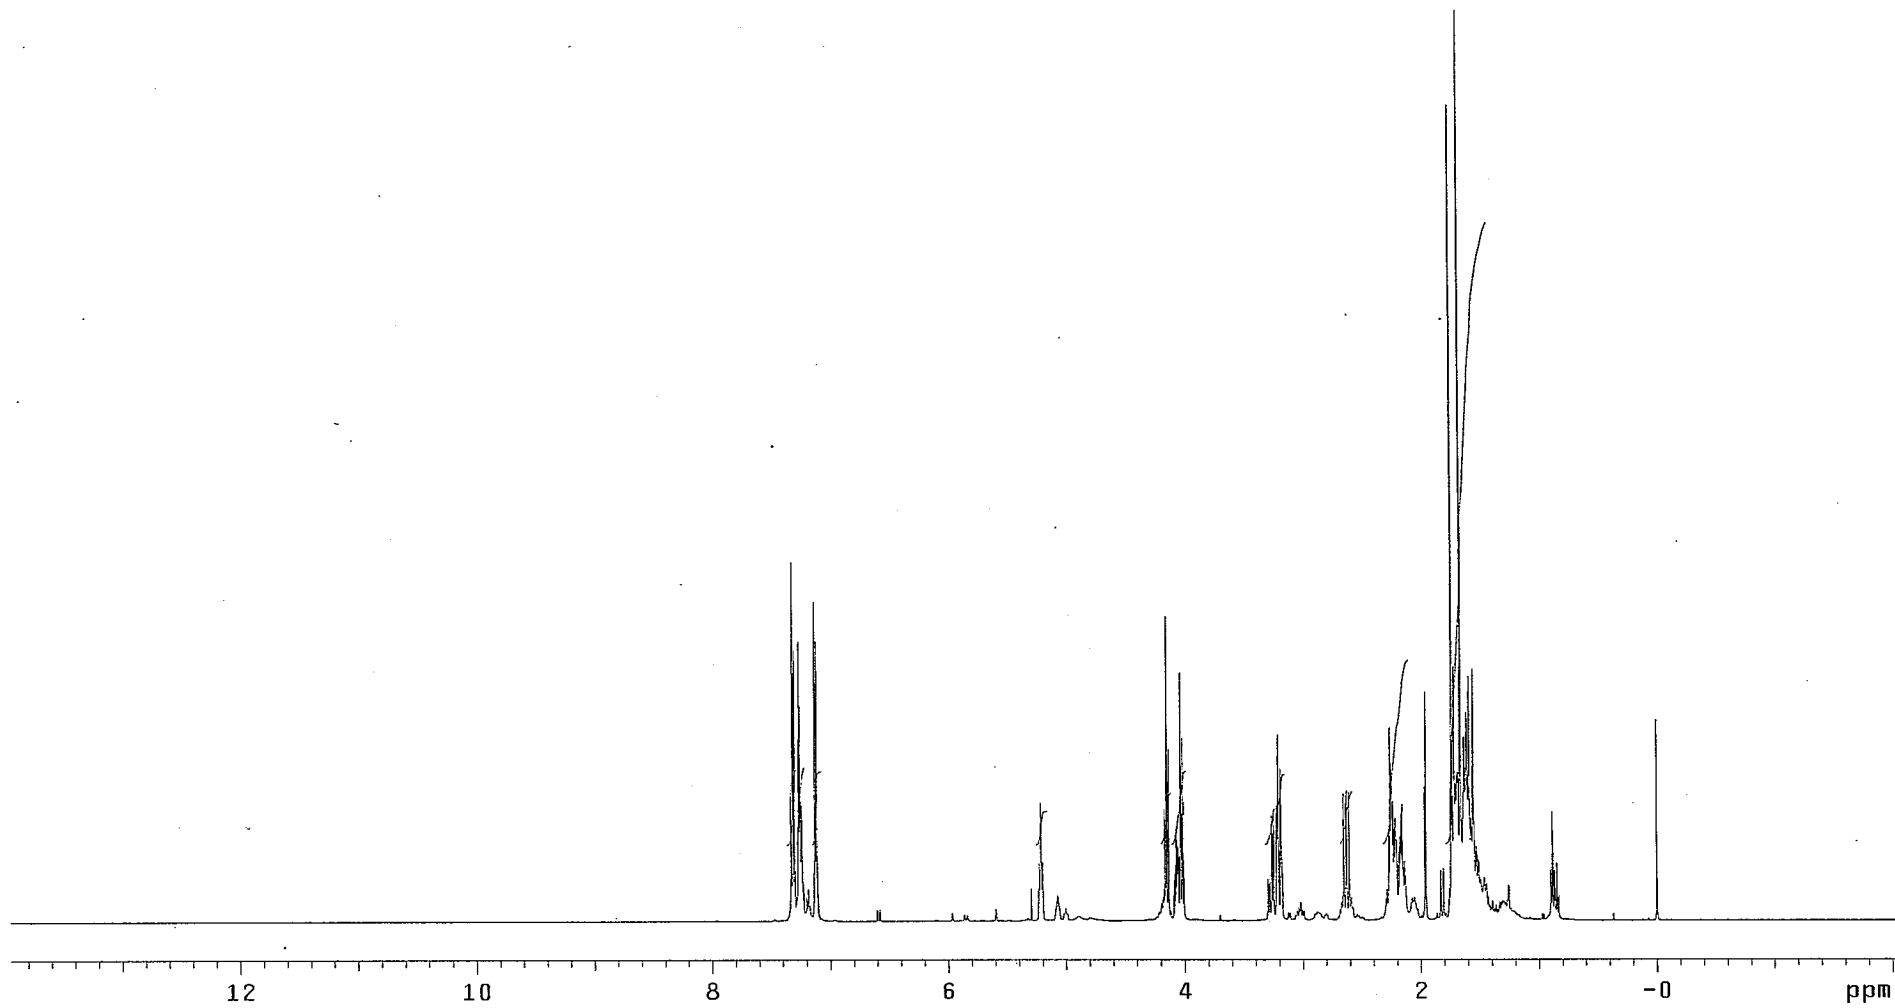

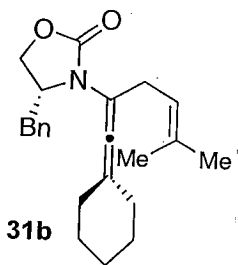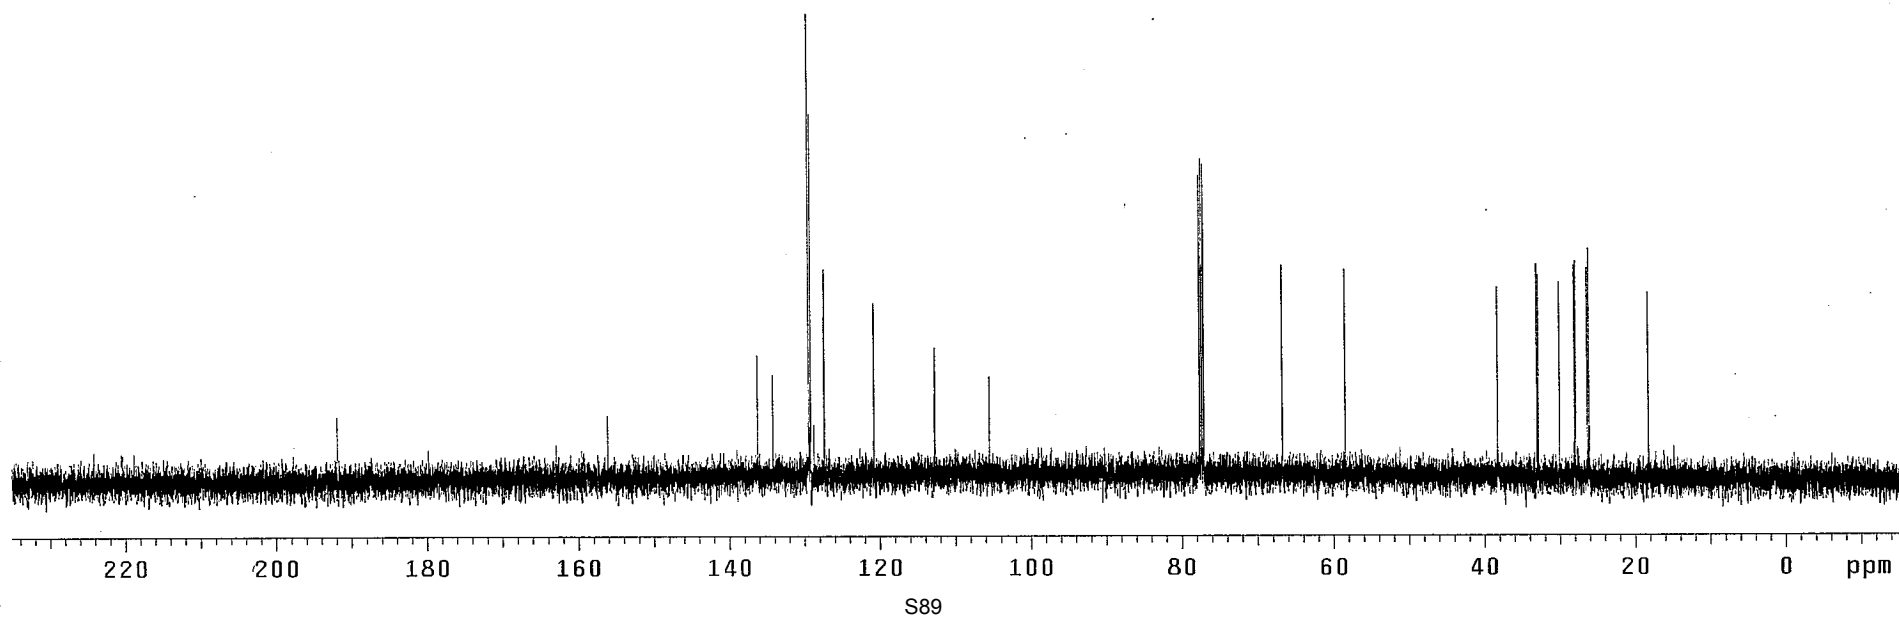

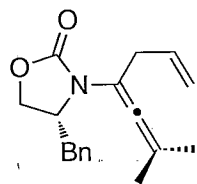

32

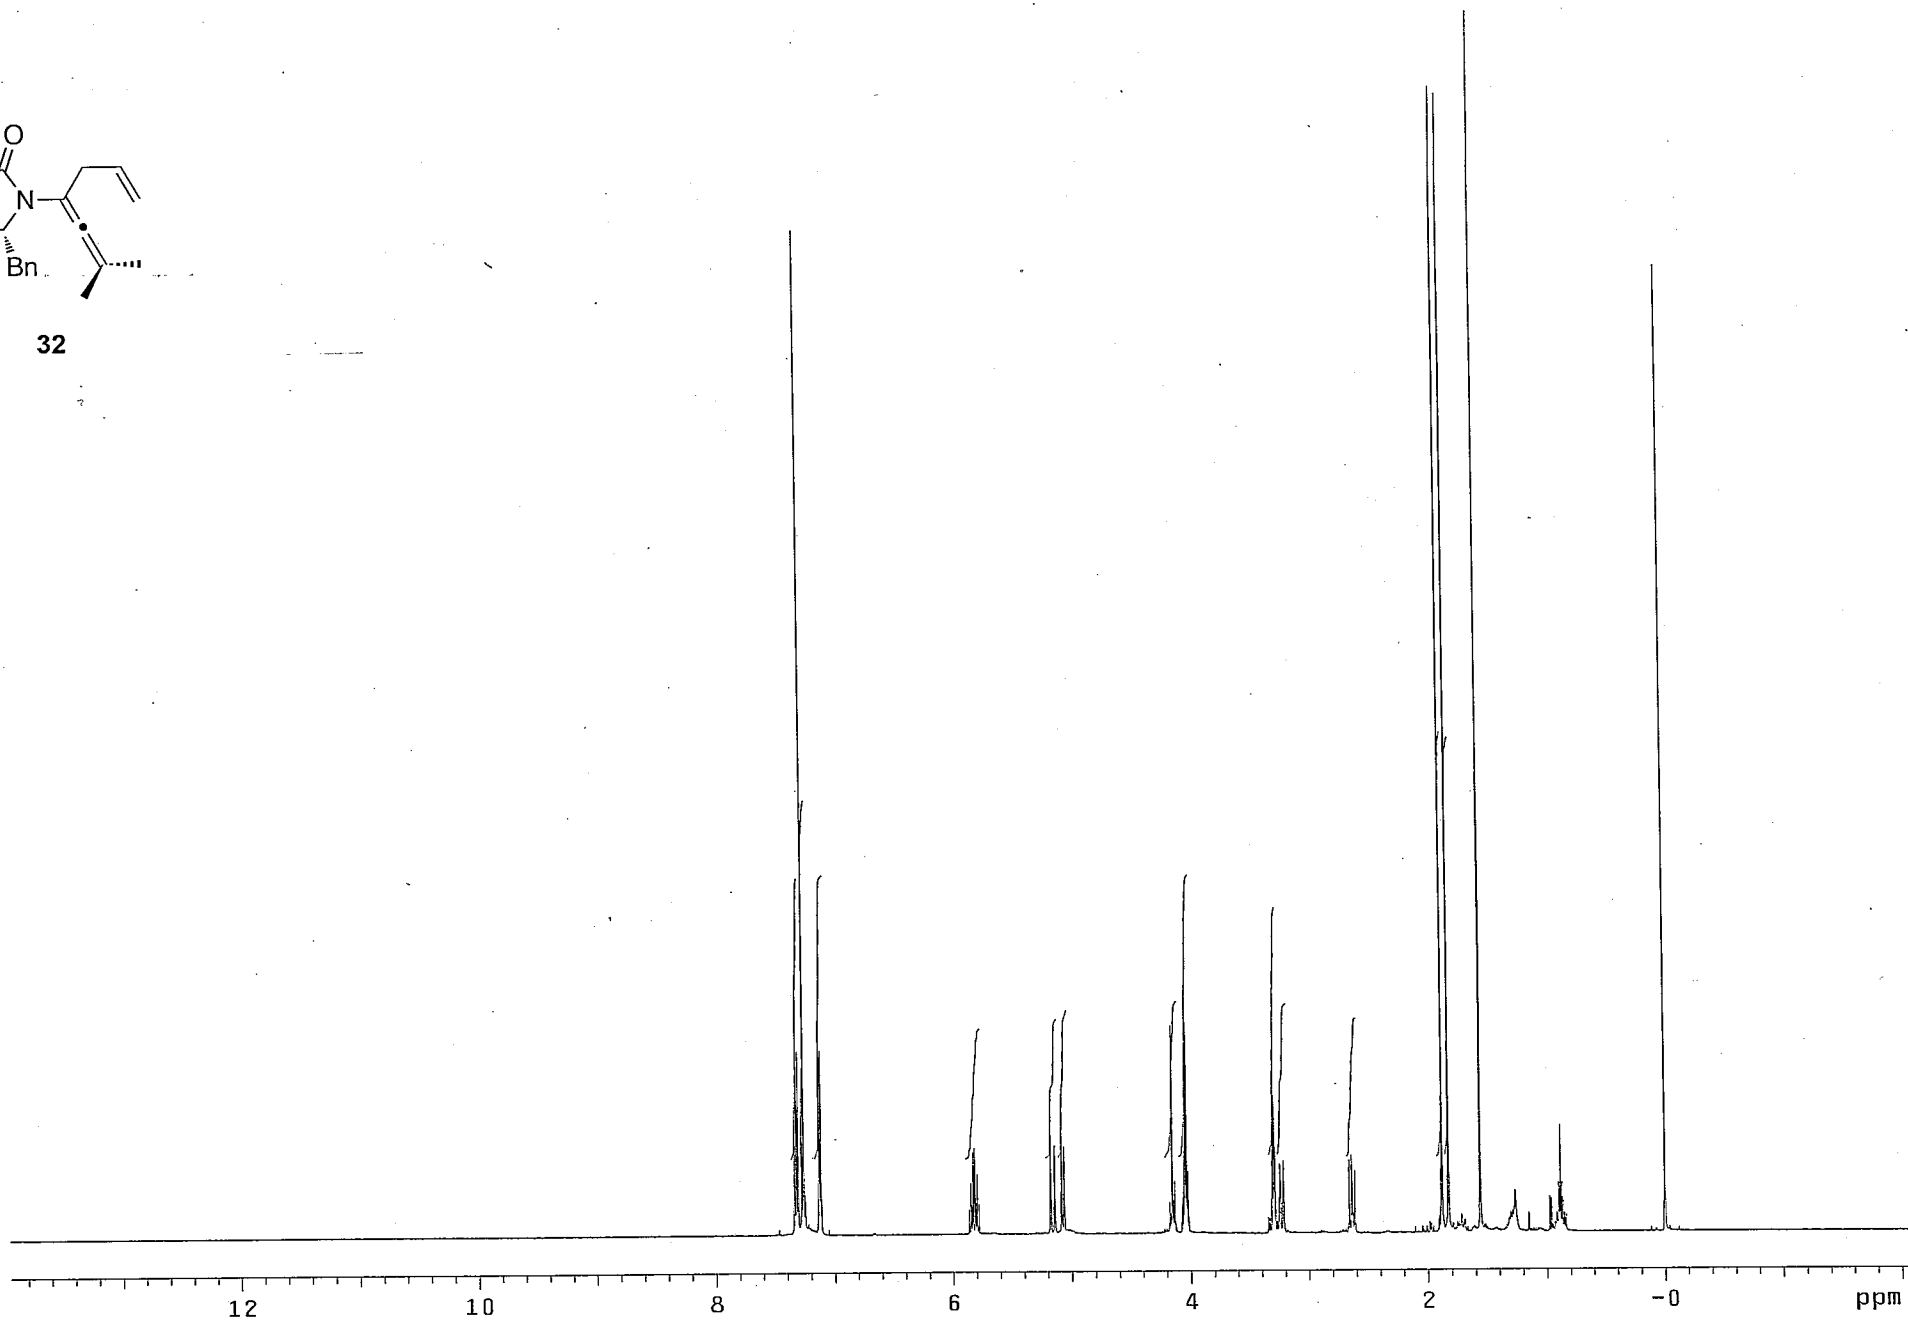

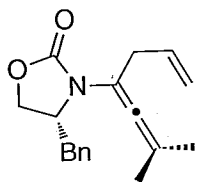

32

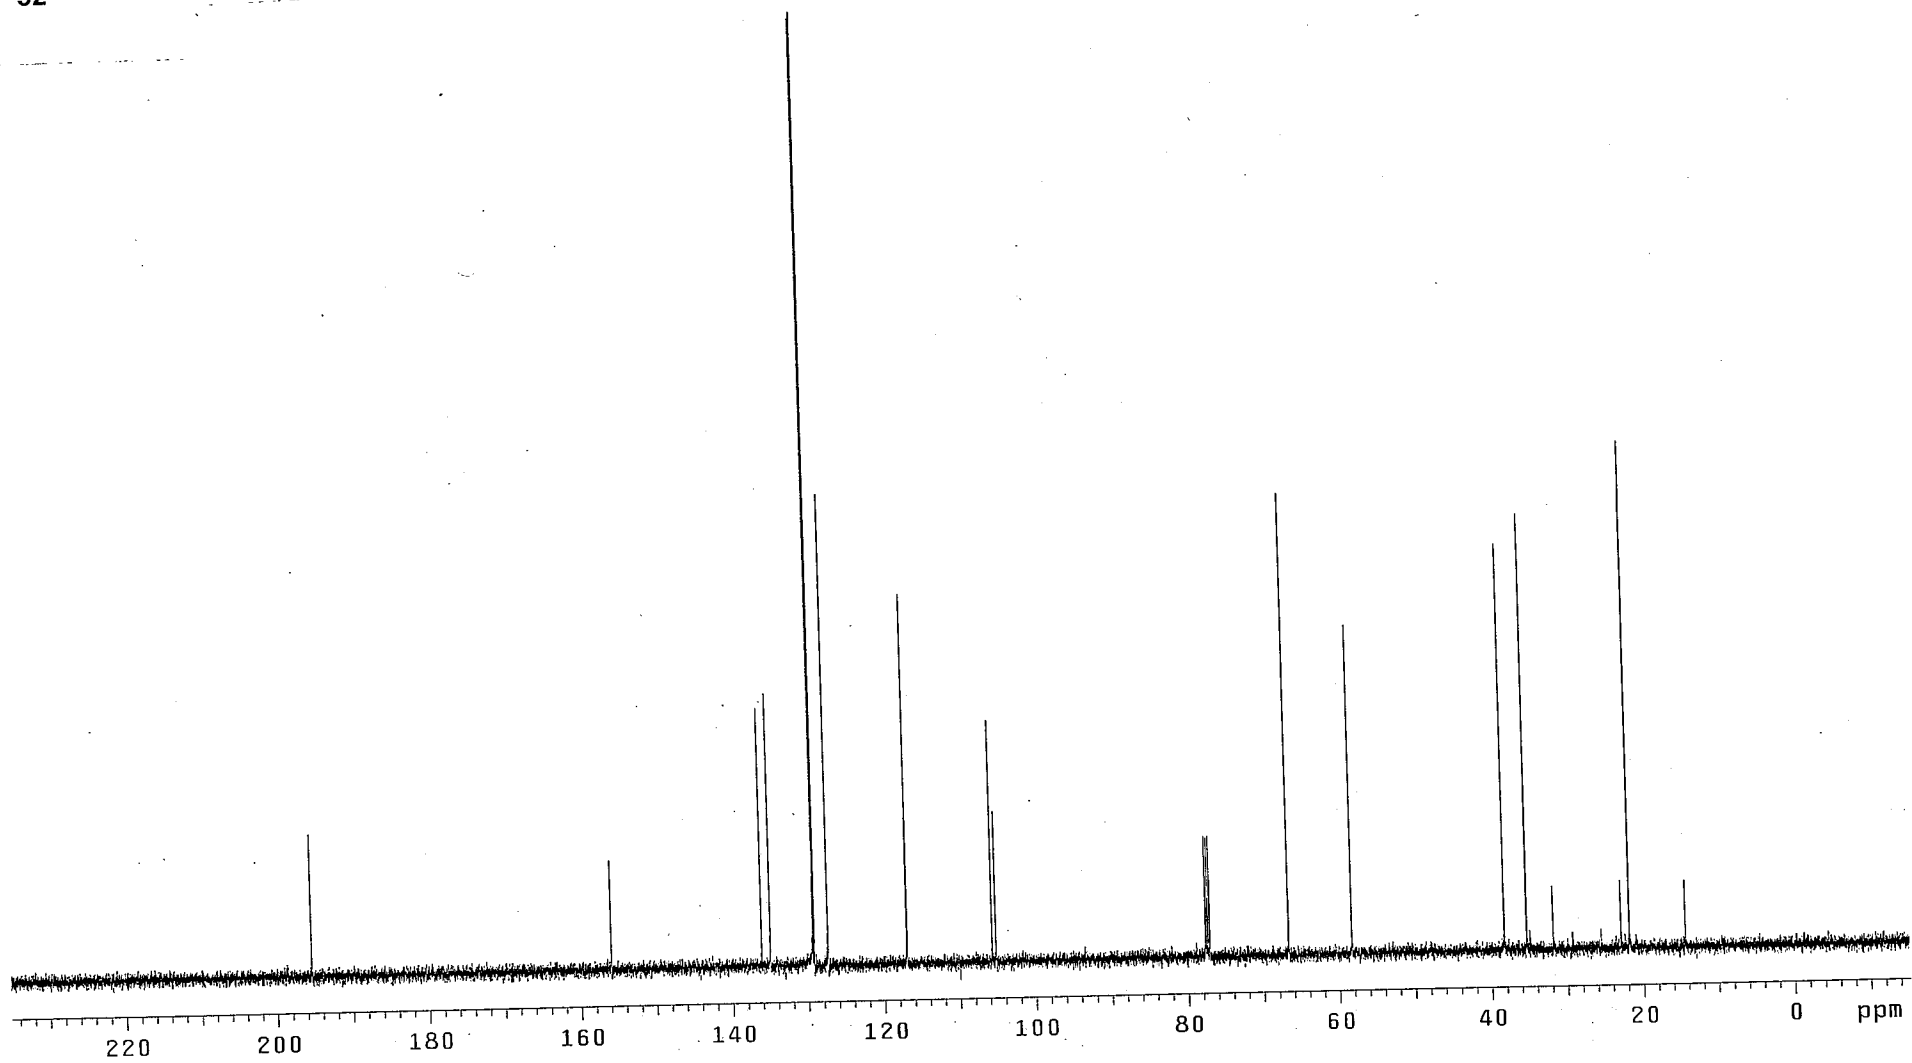

S91

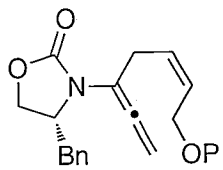

37a: P = TBDPS

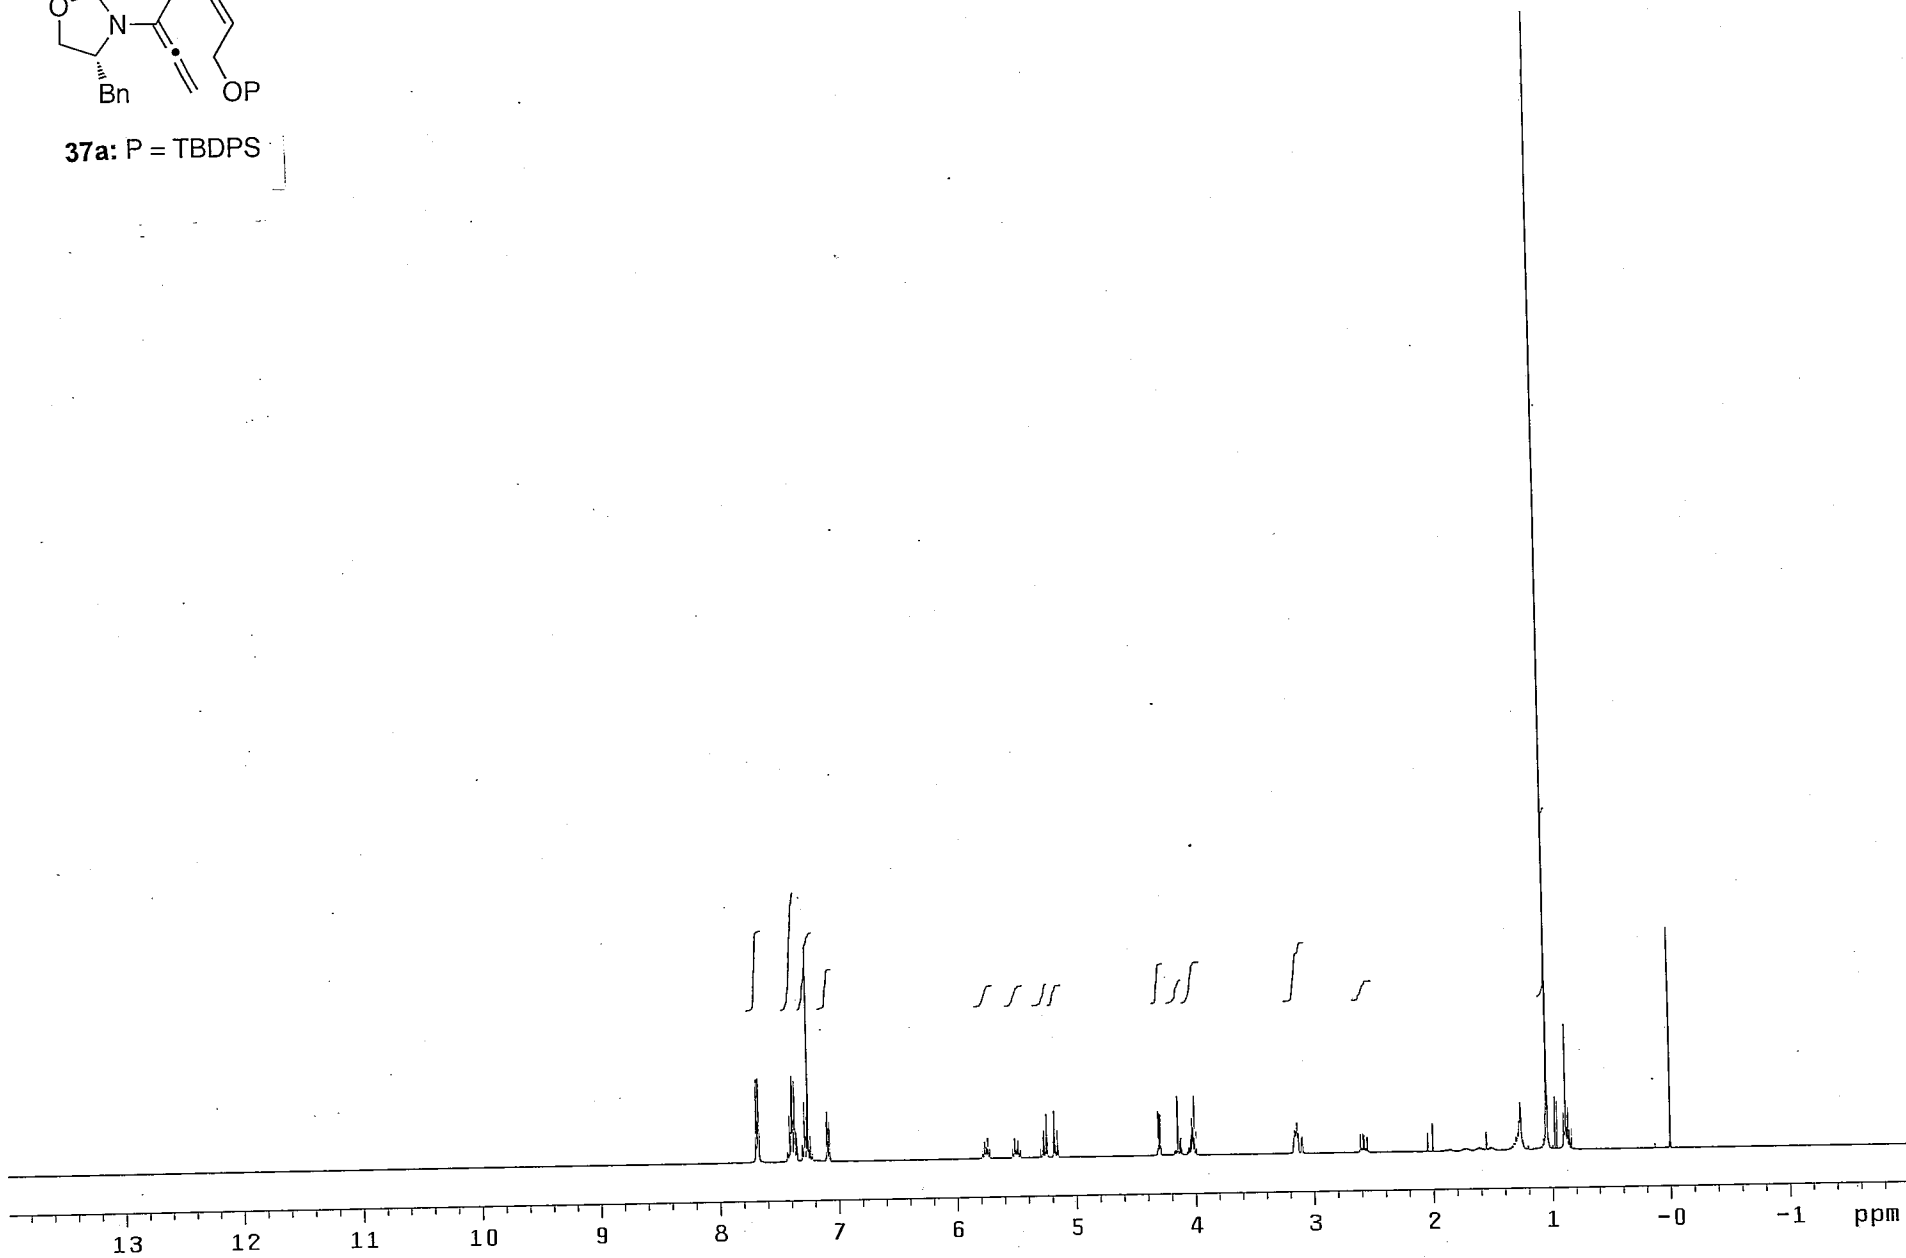

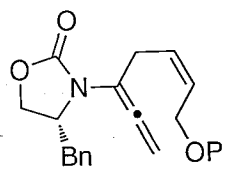

37a: P = TBDPS

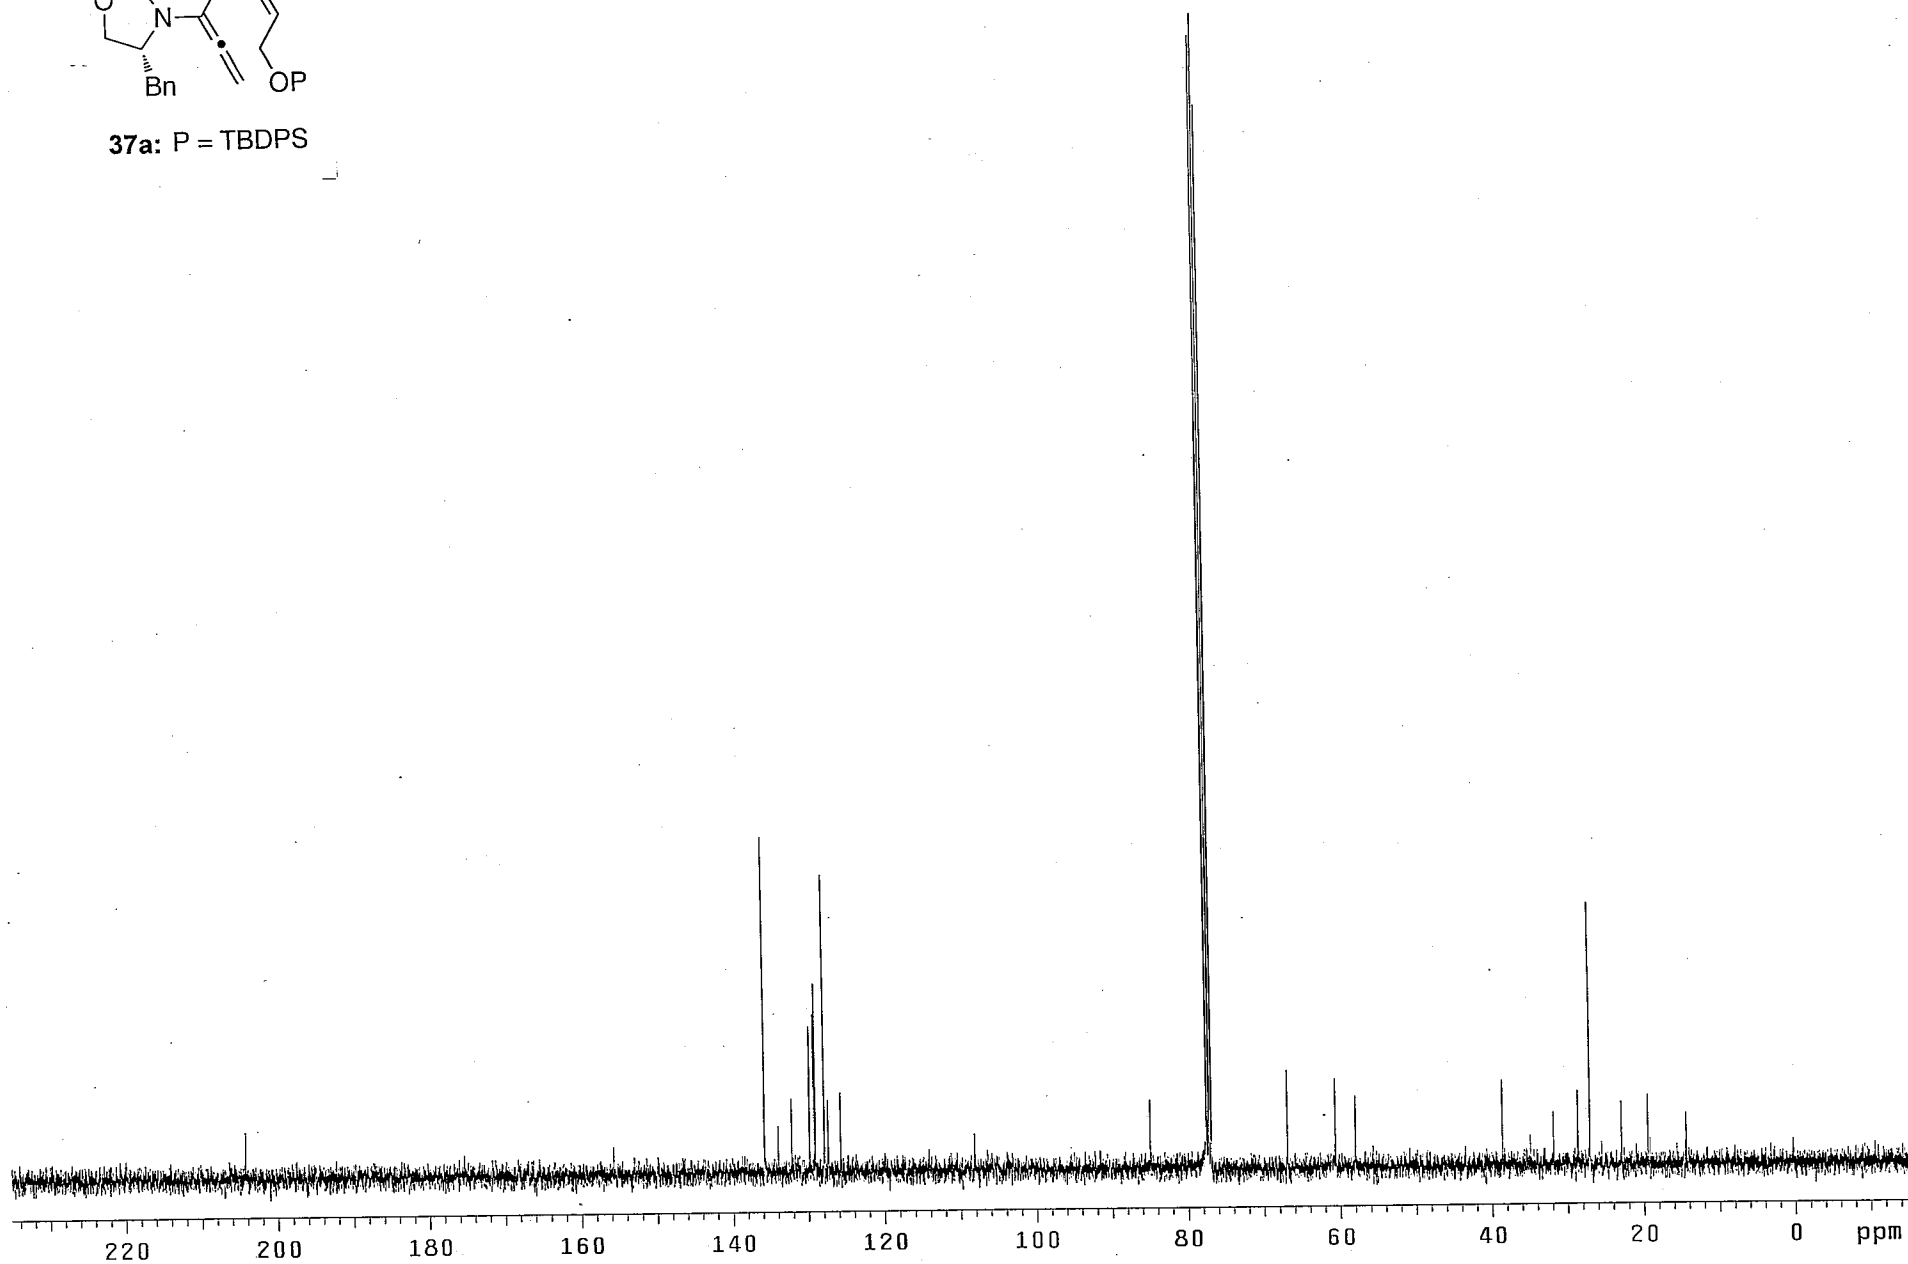



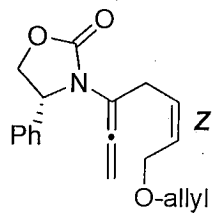

37b

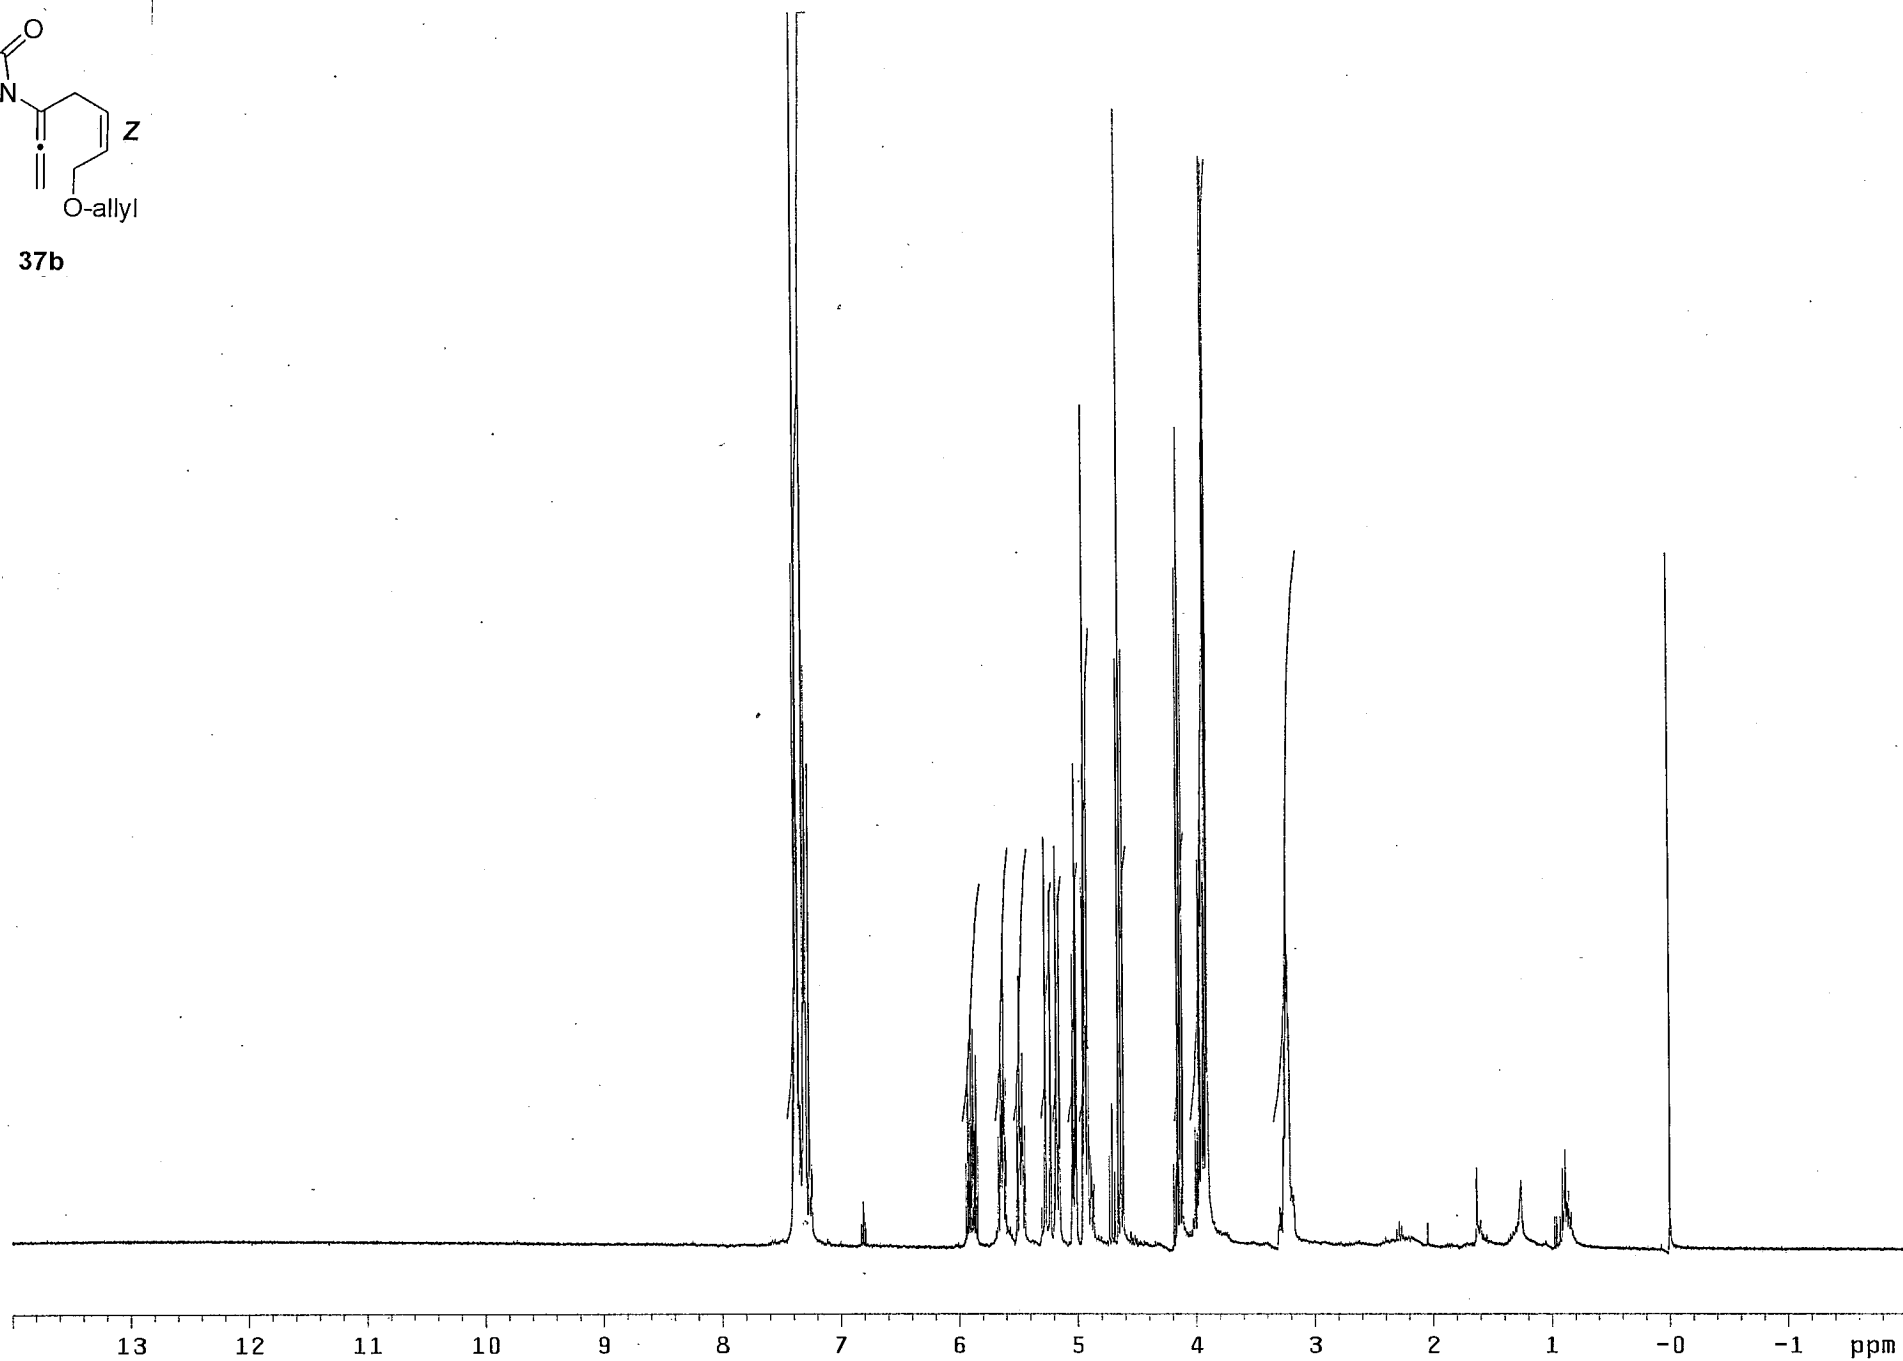

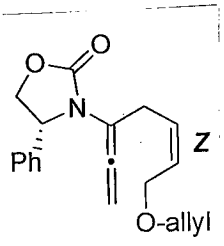

37b

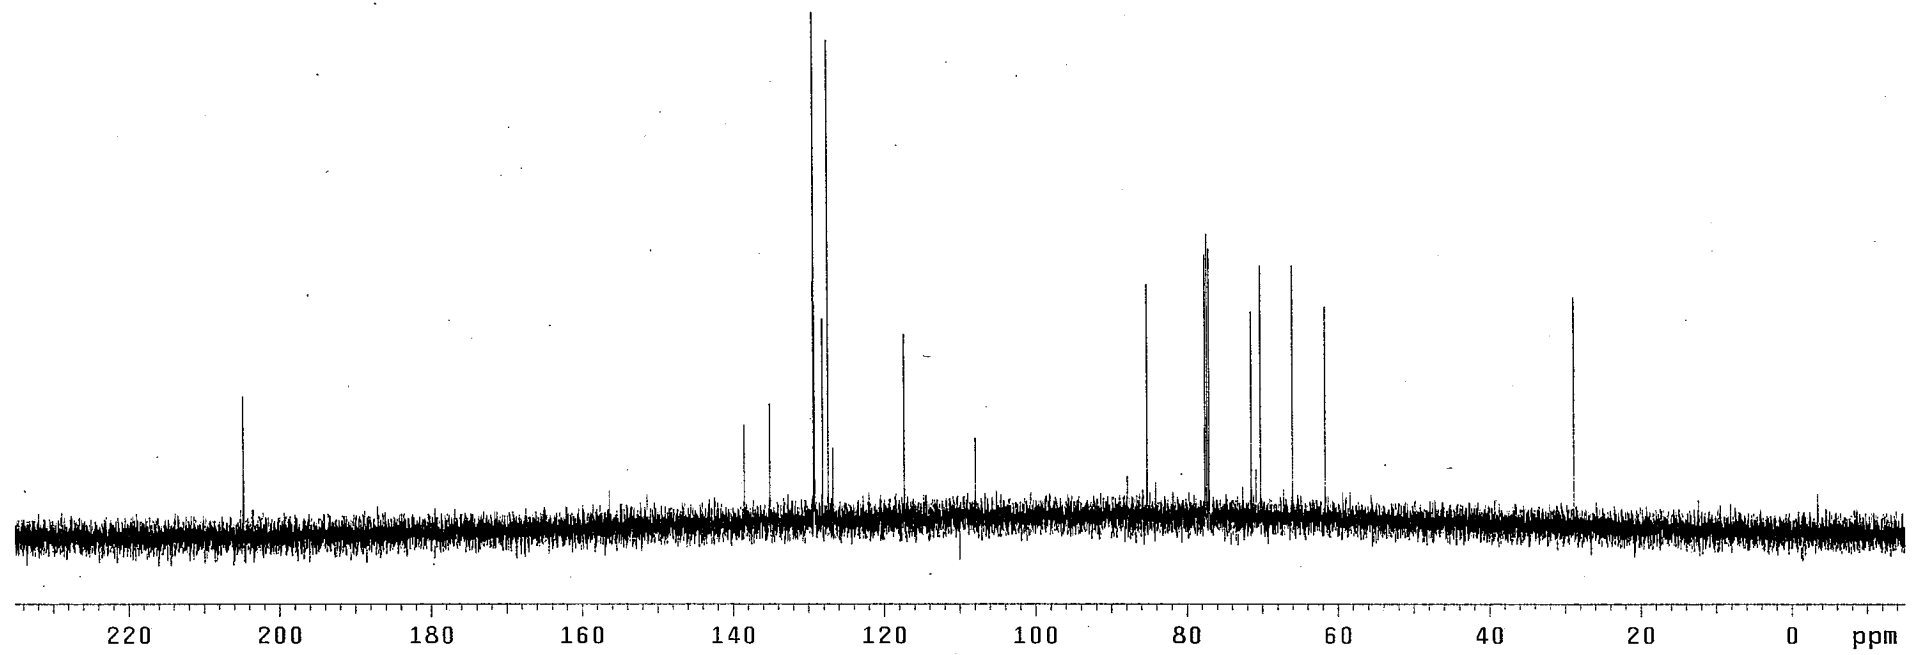

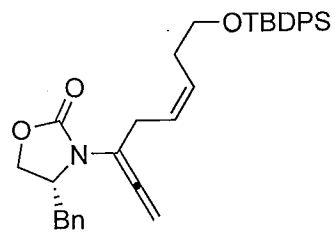

40

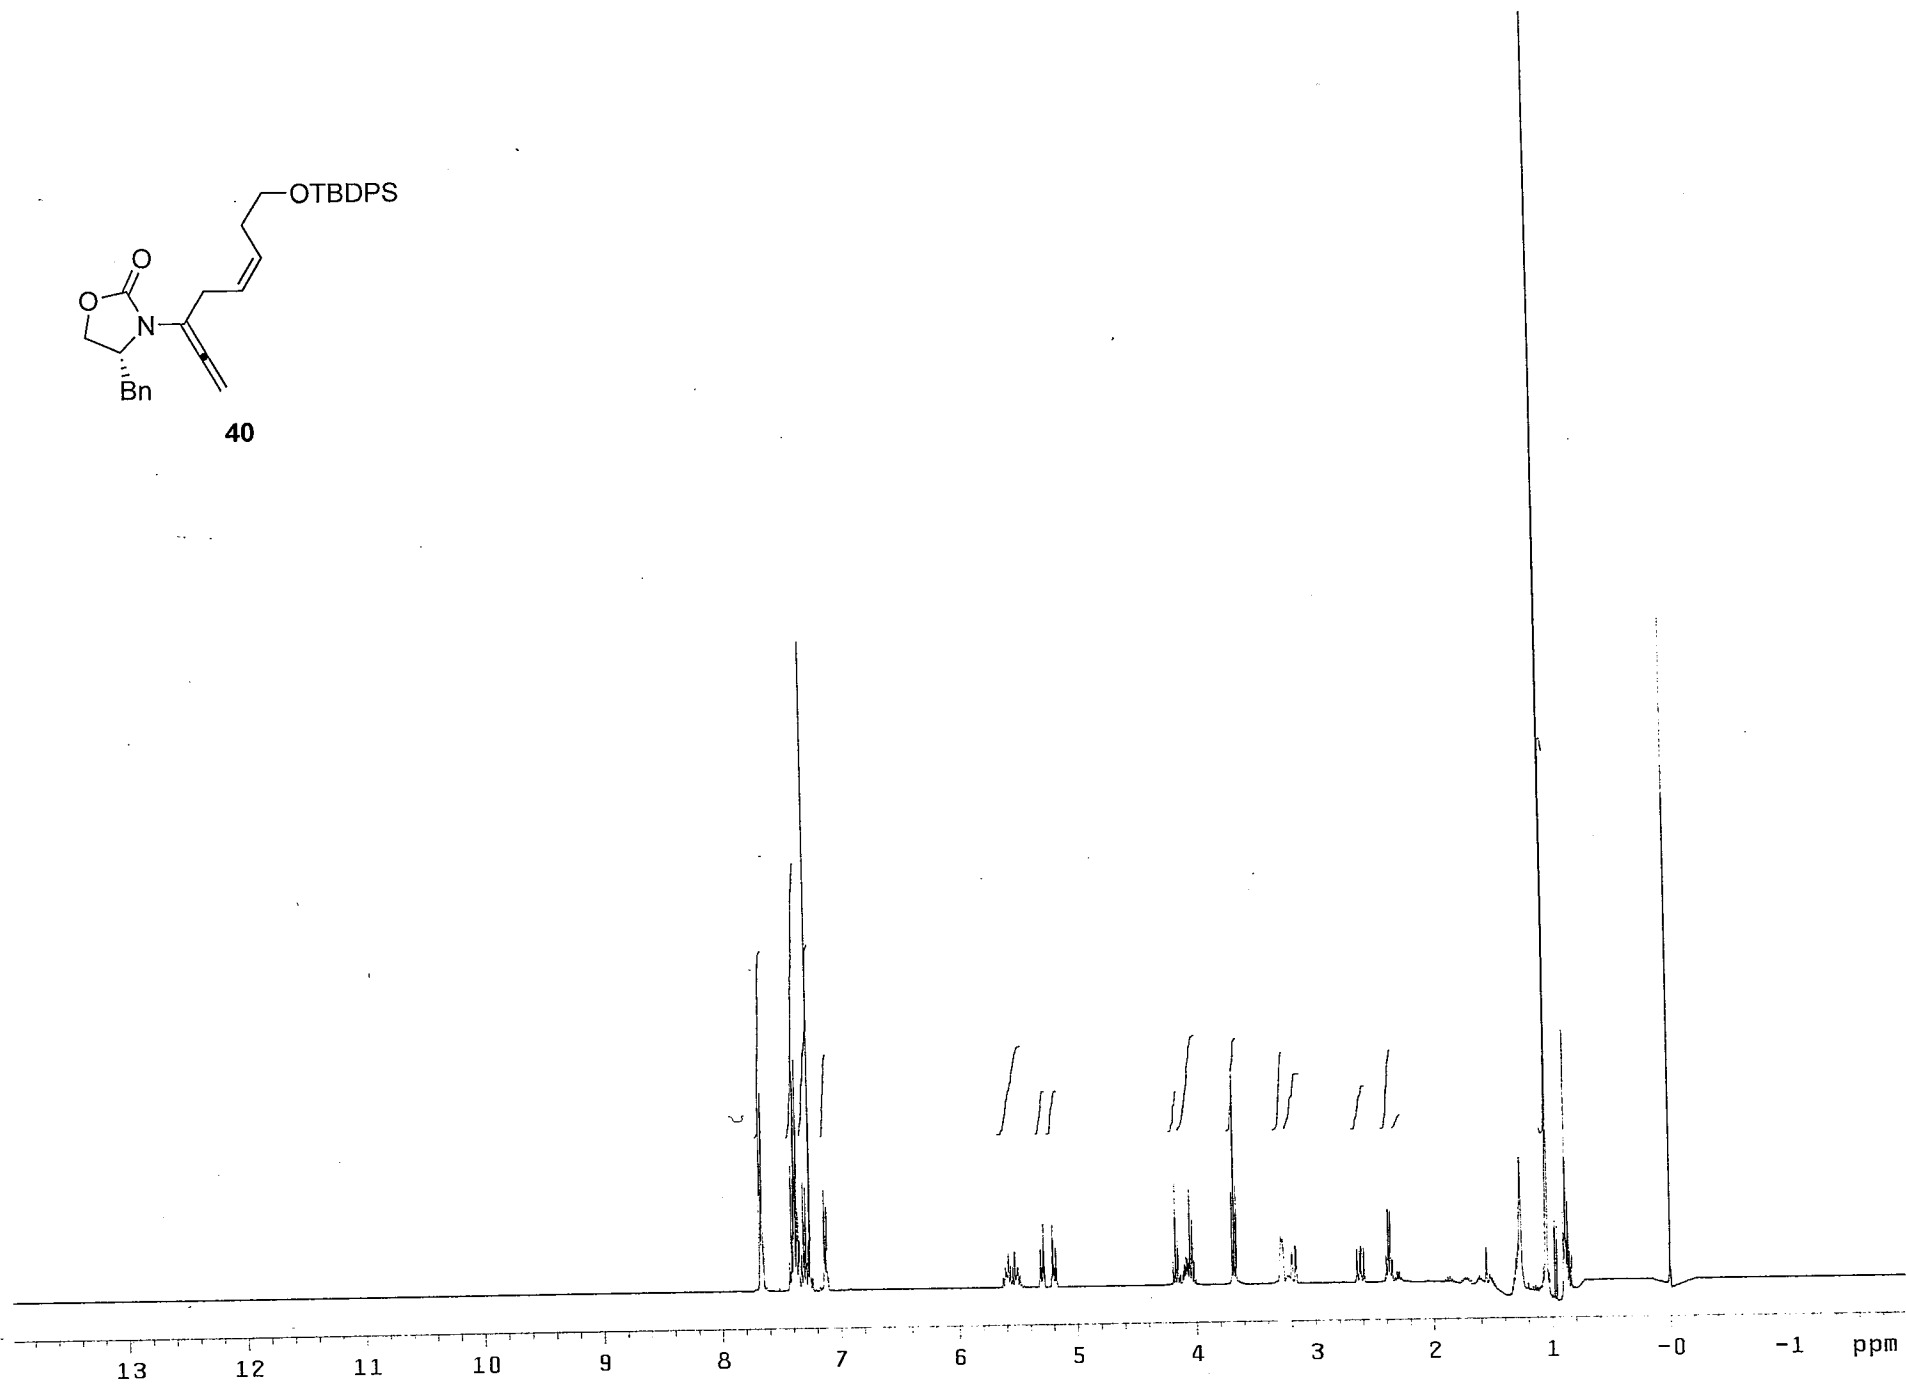

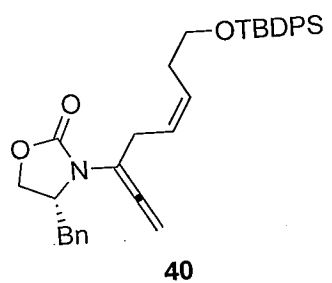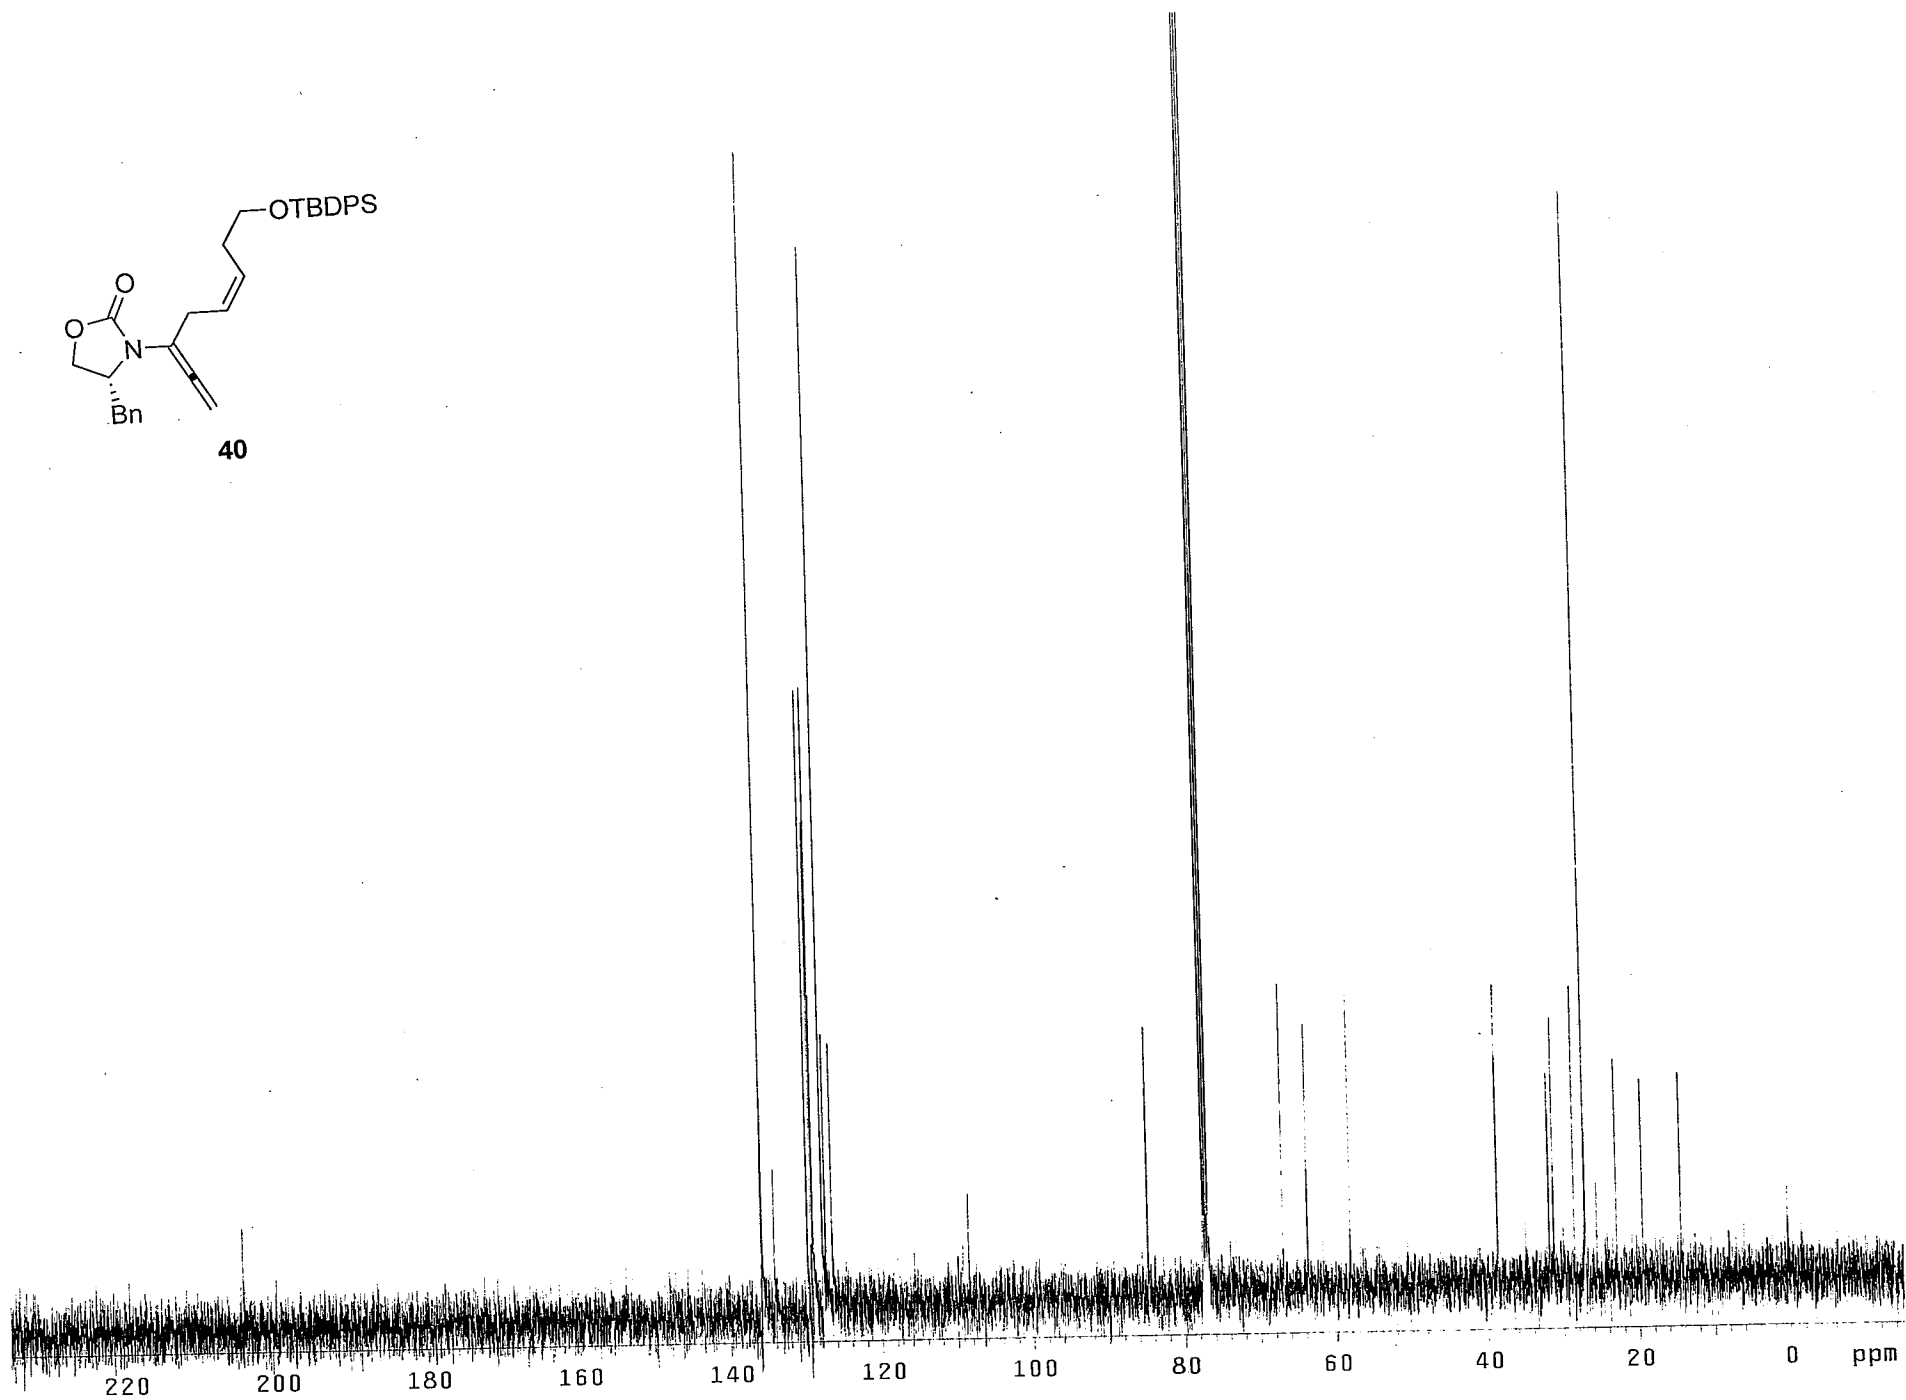

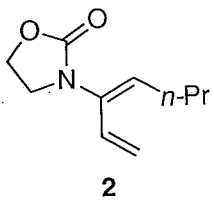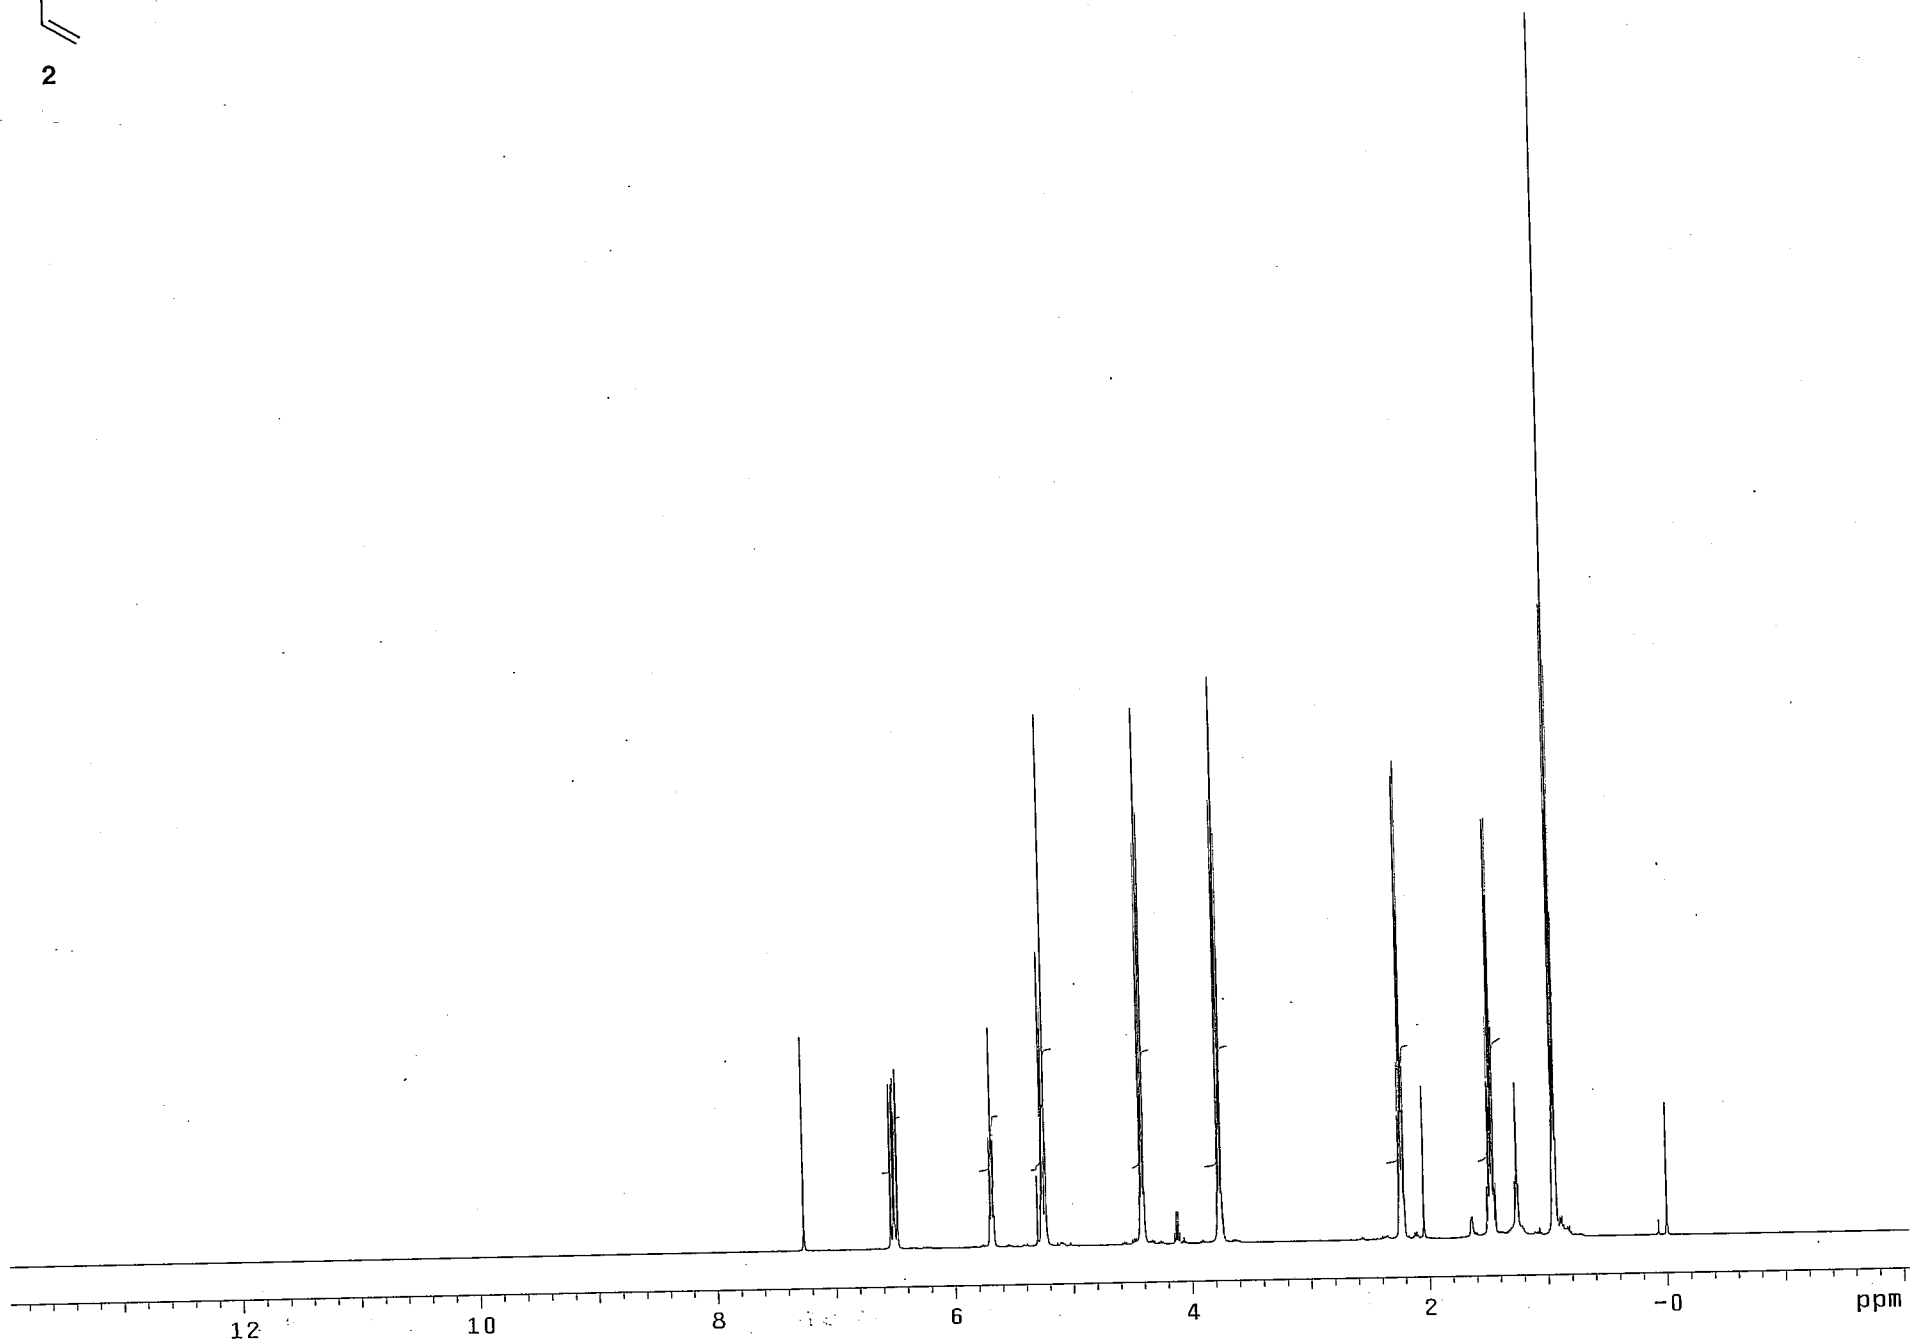

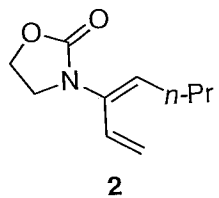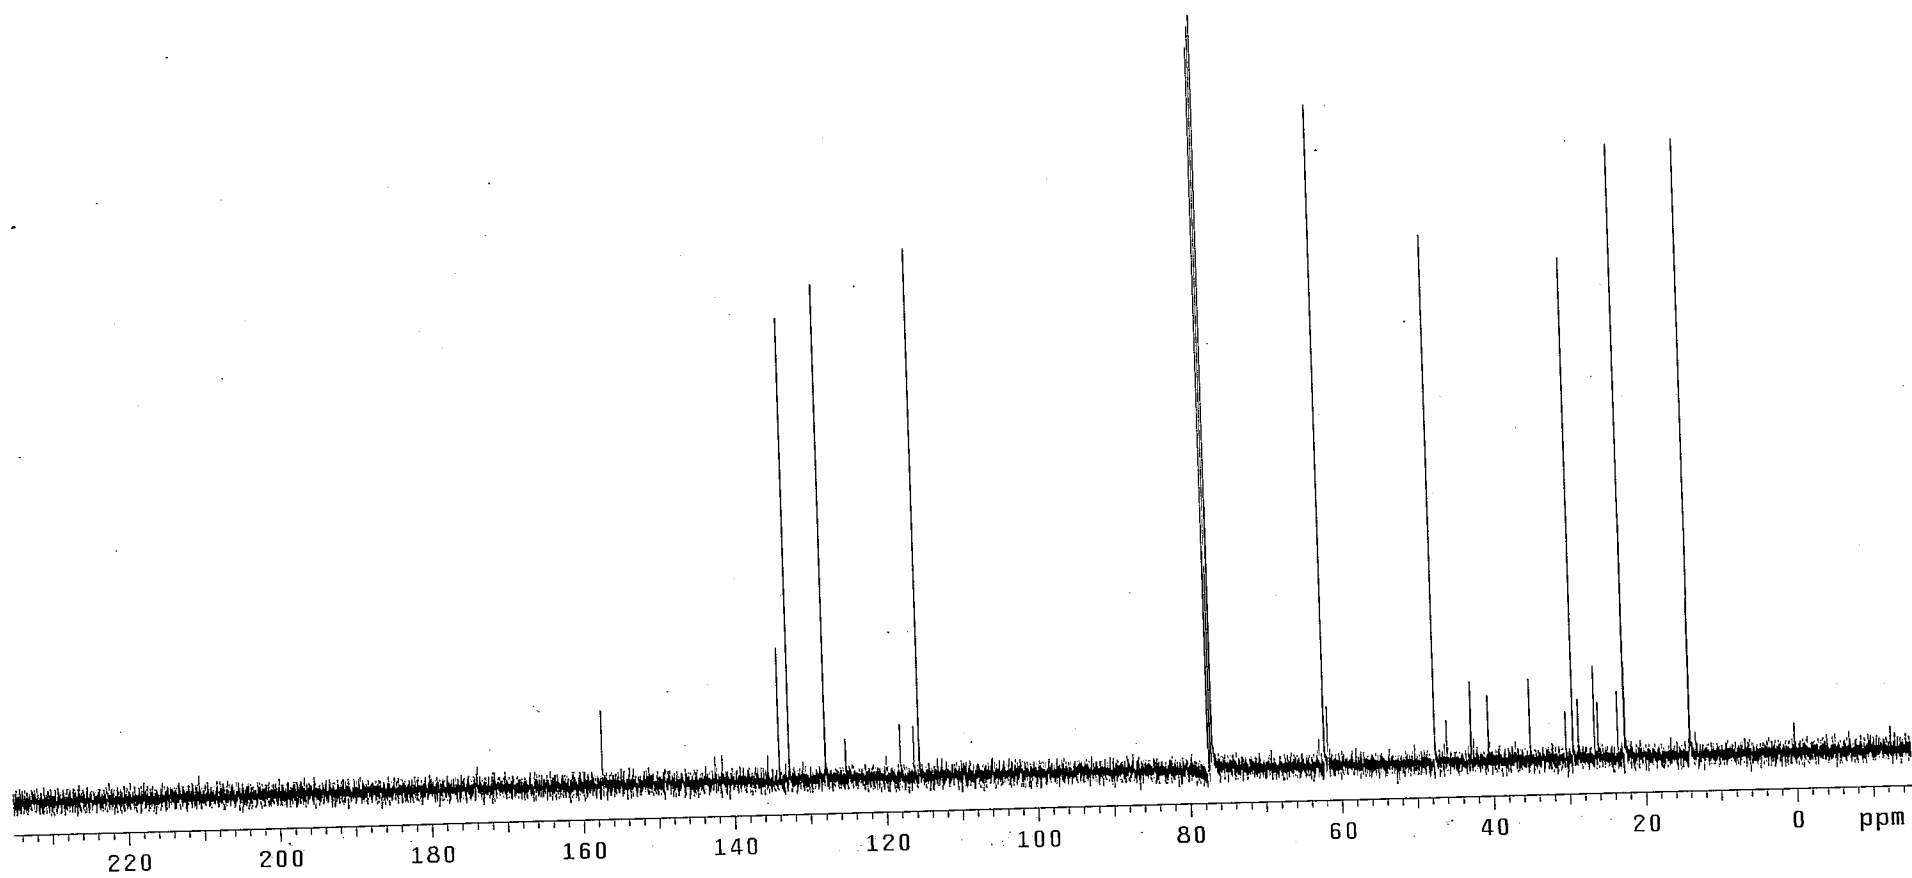

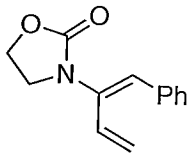

4

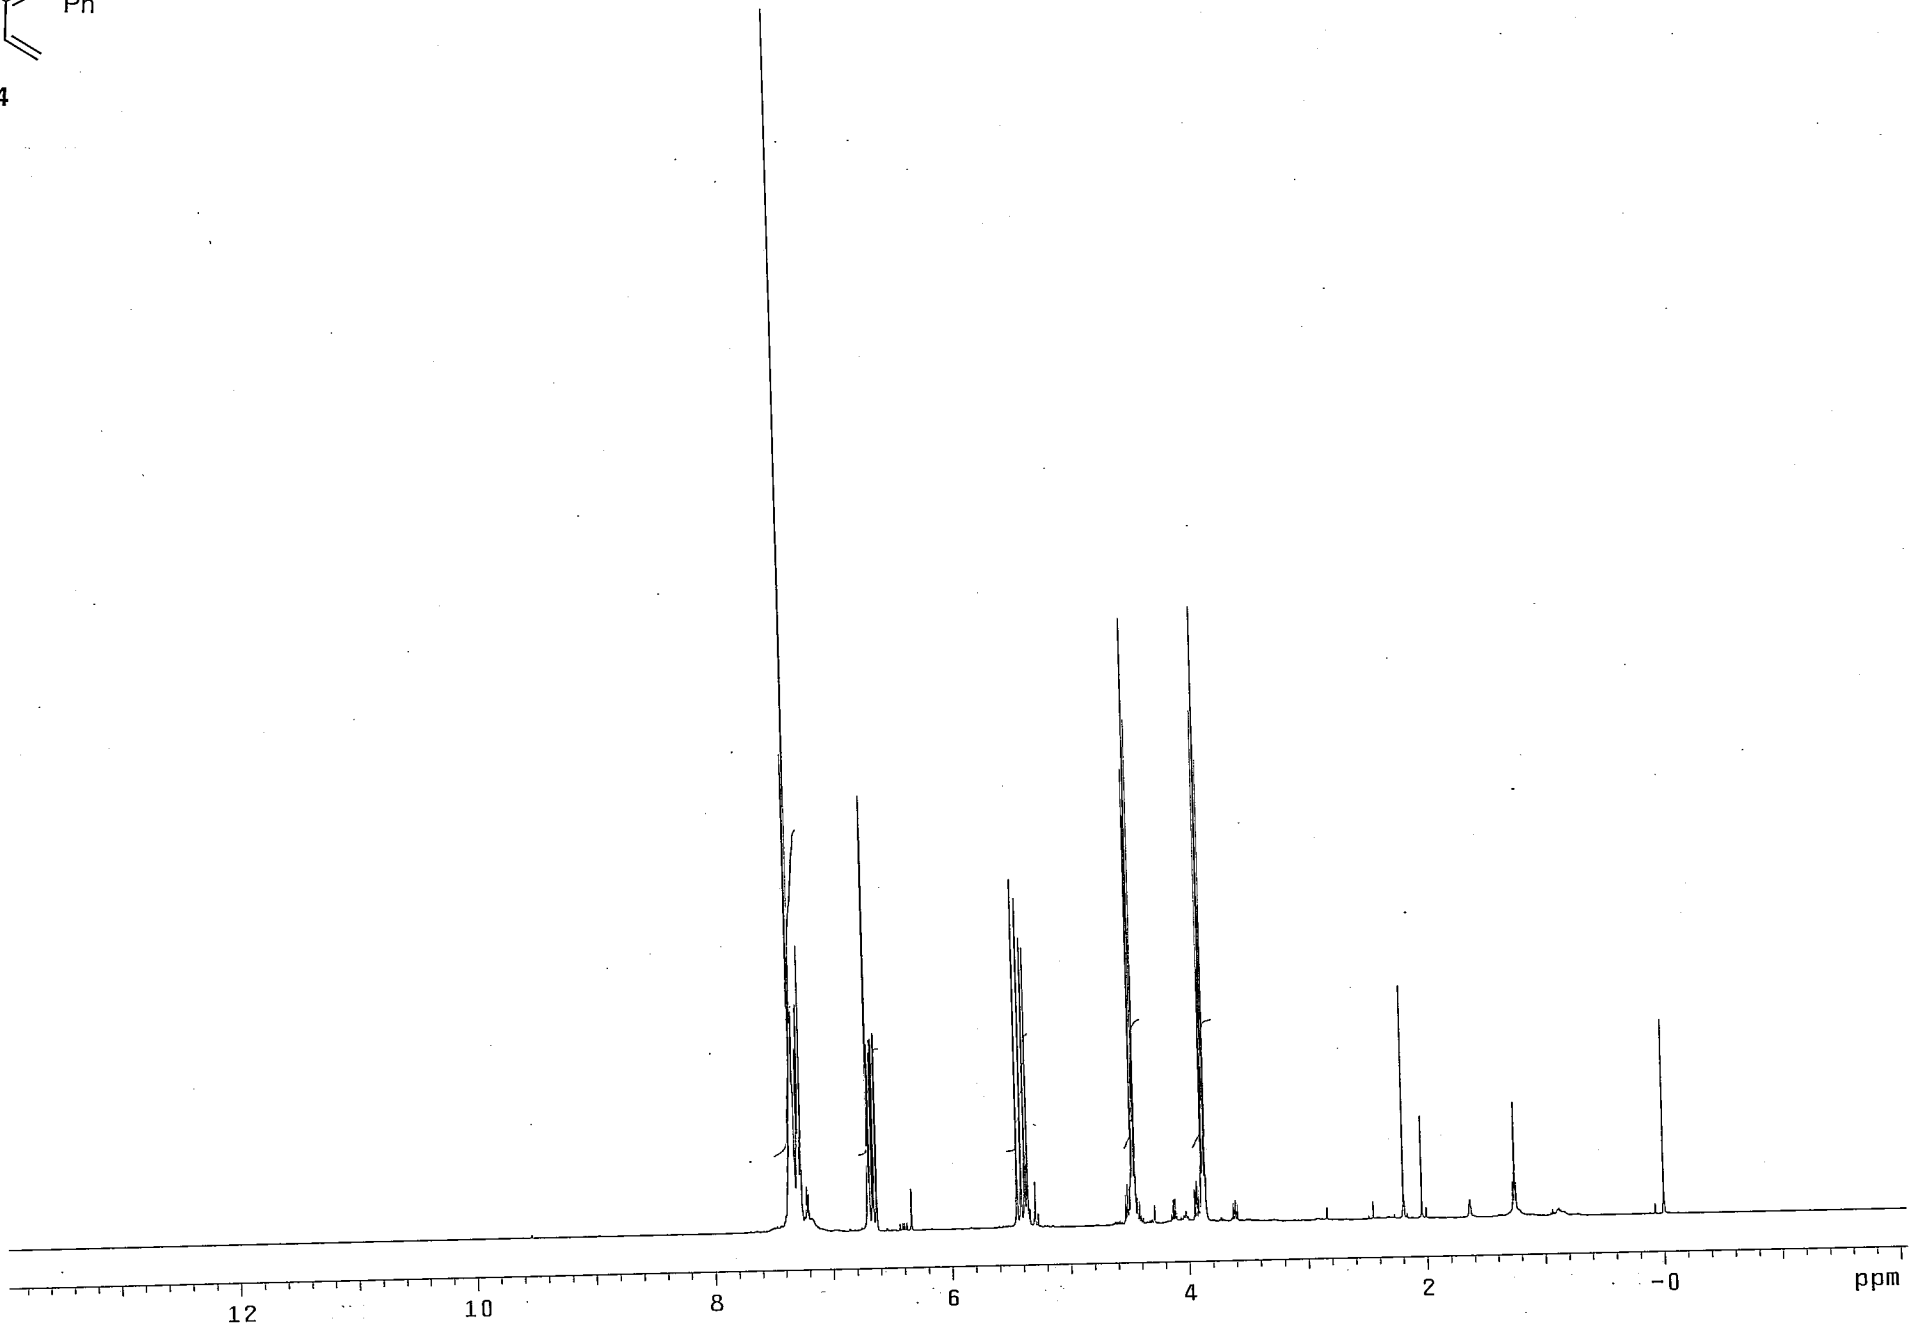

S100

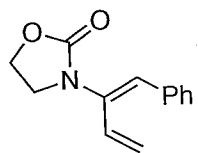

4

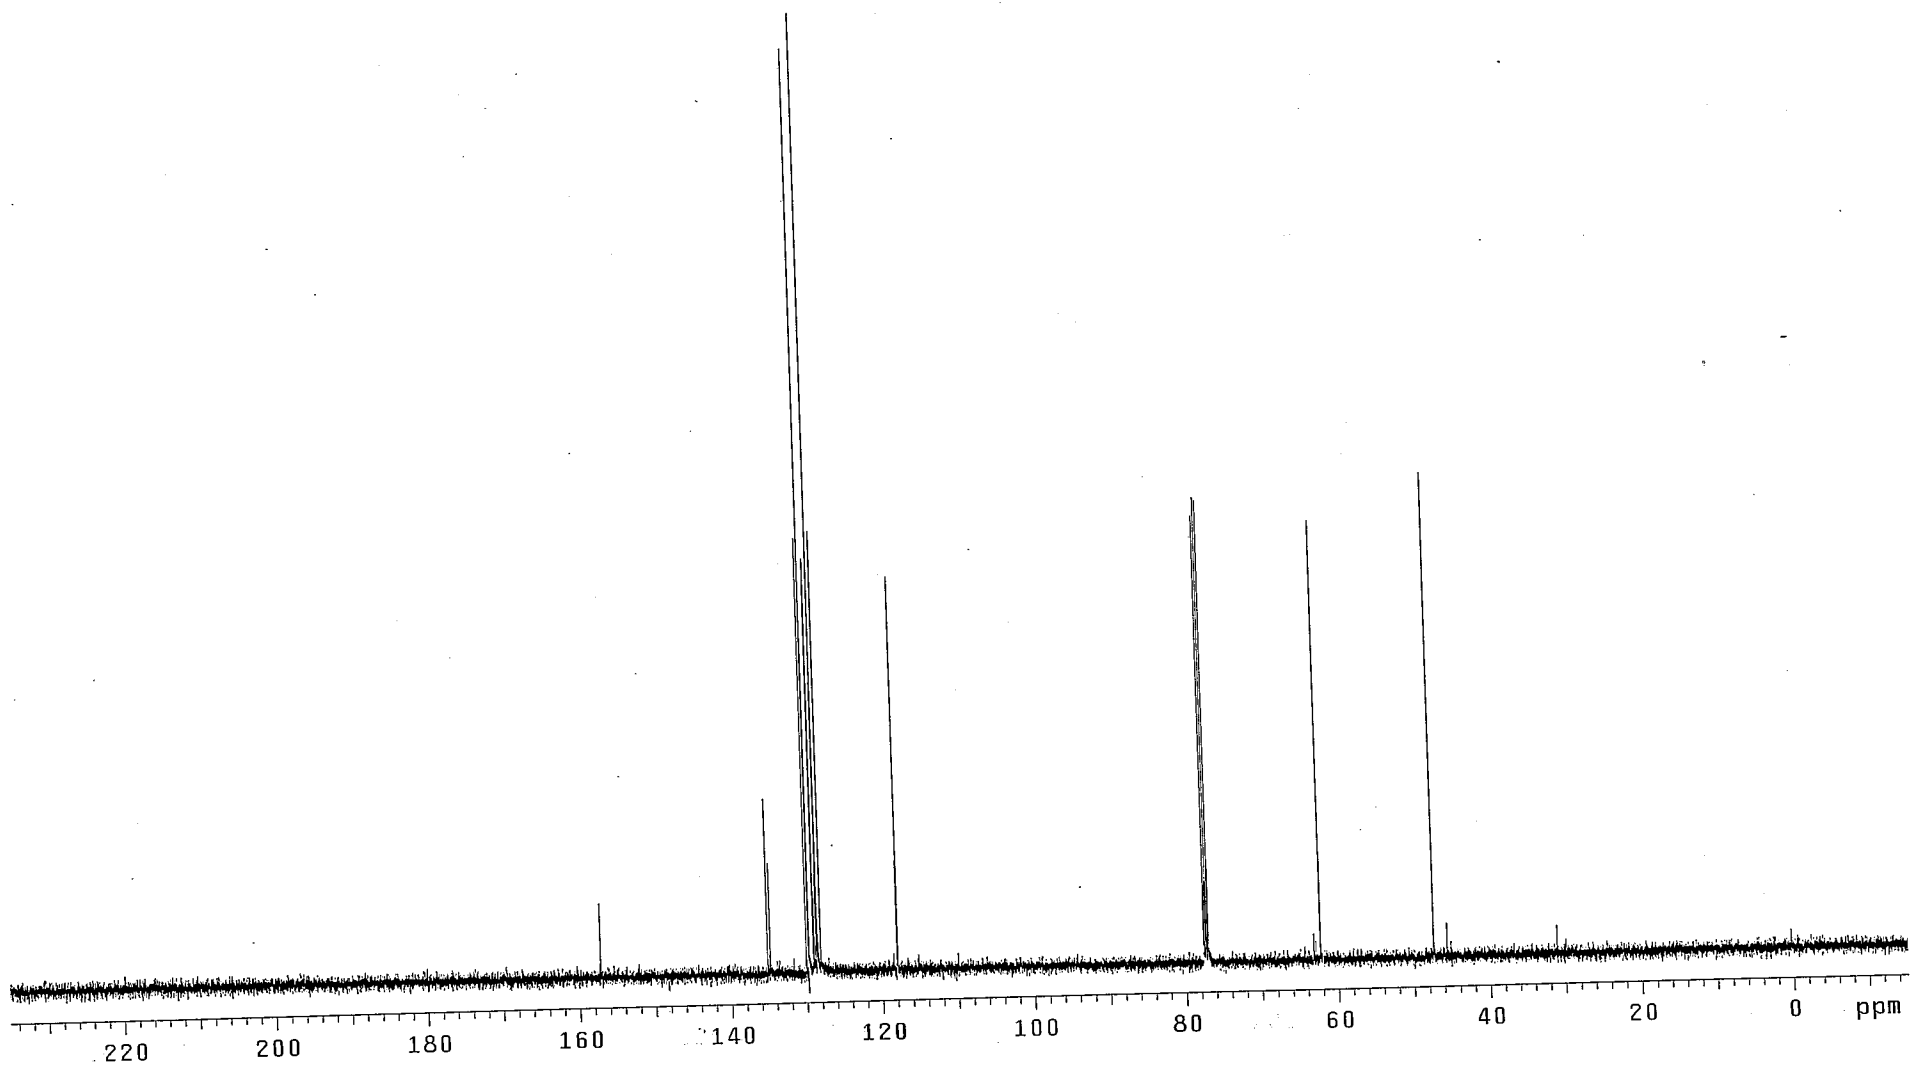

S101



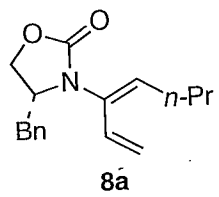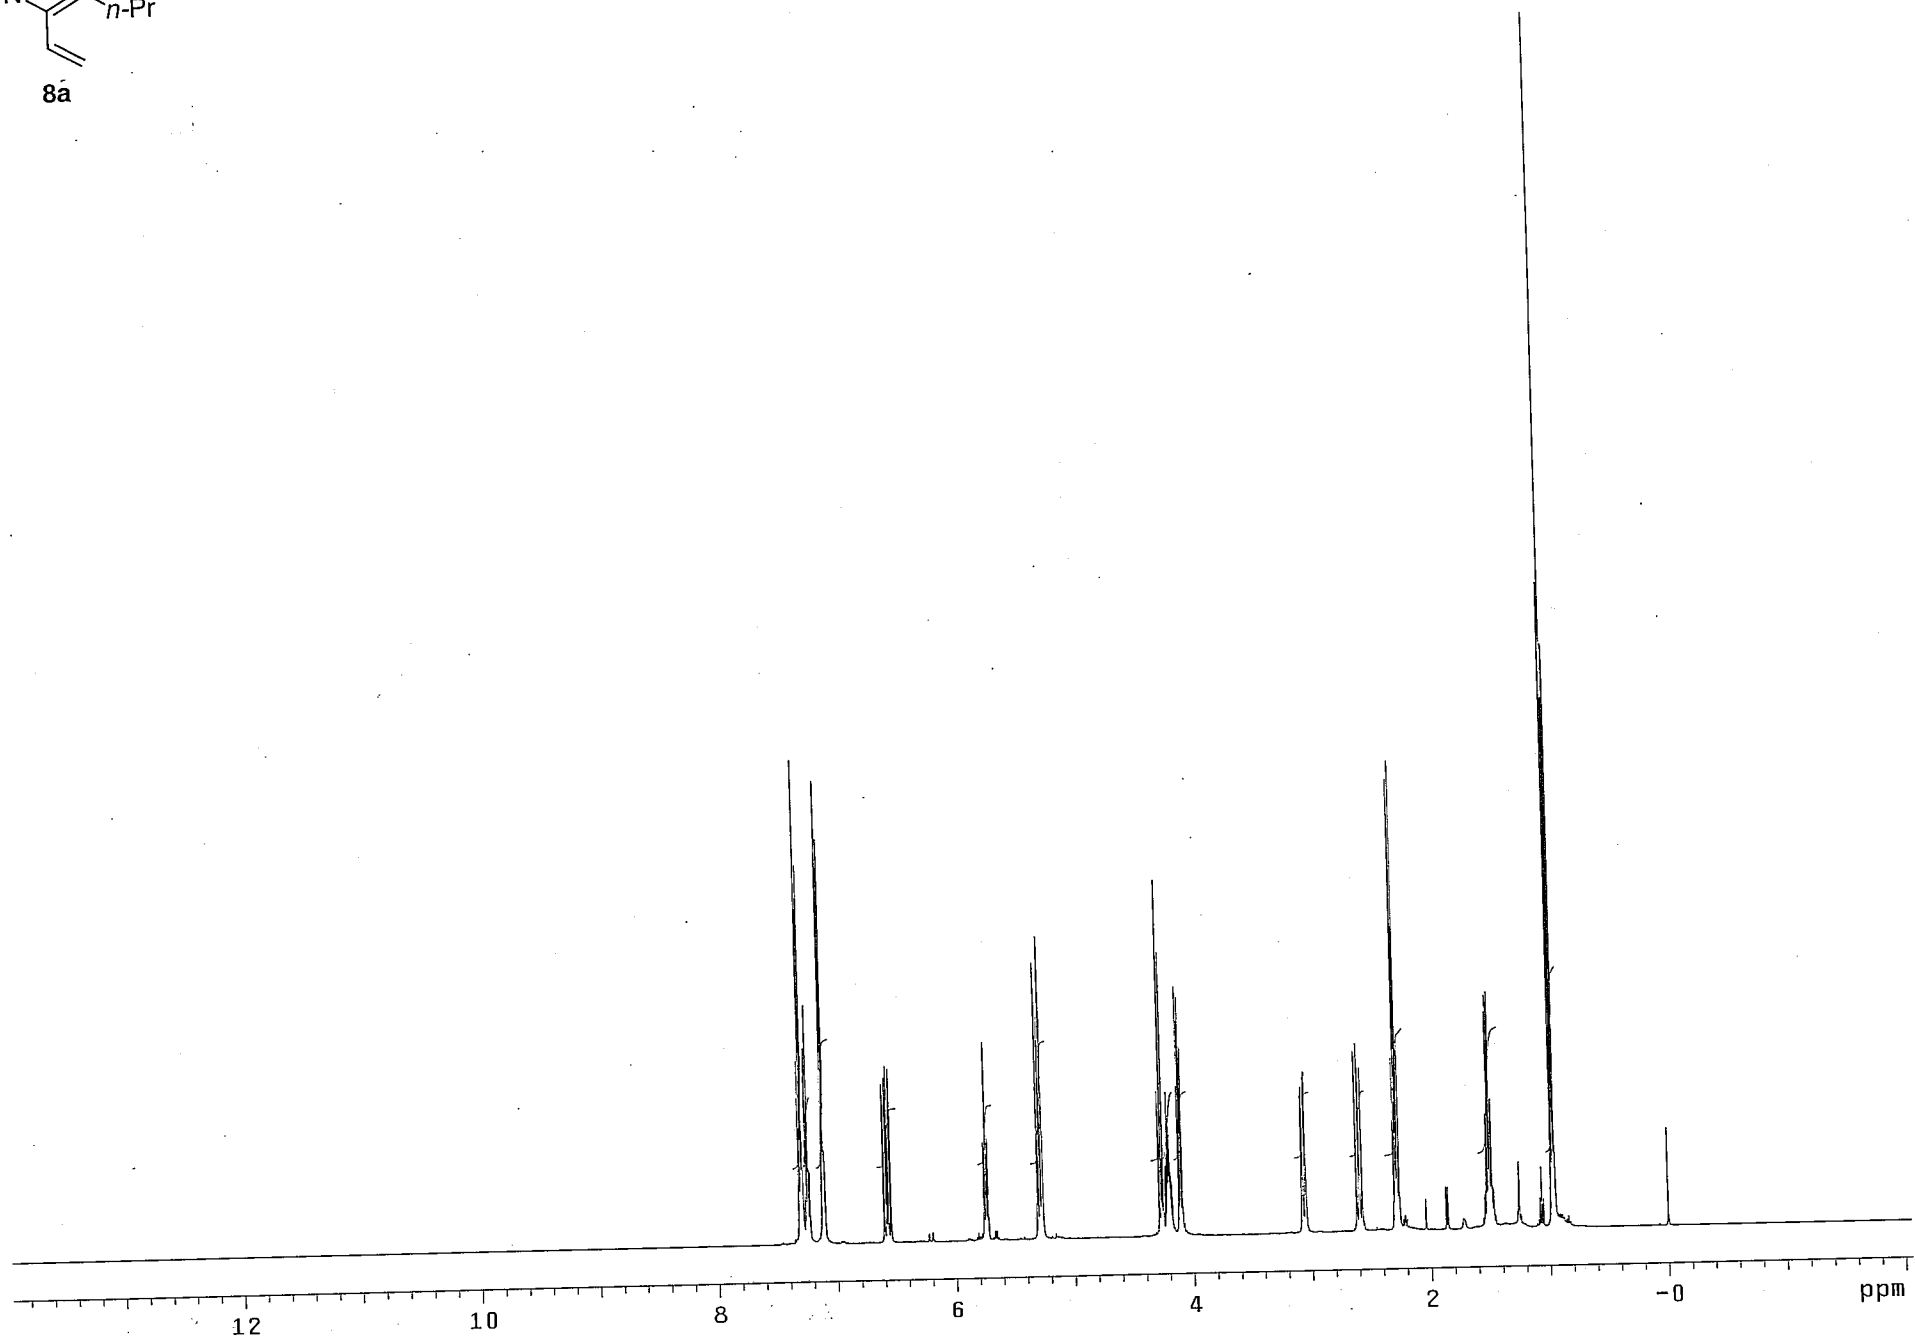

S102

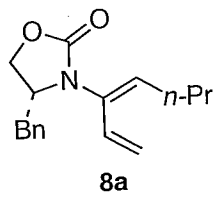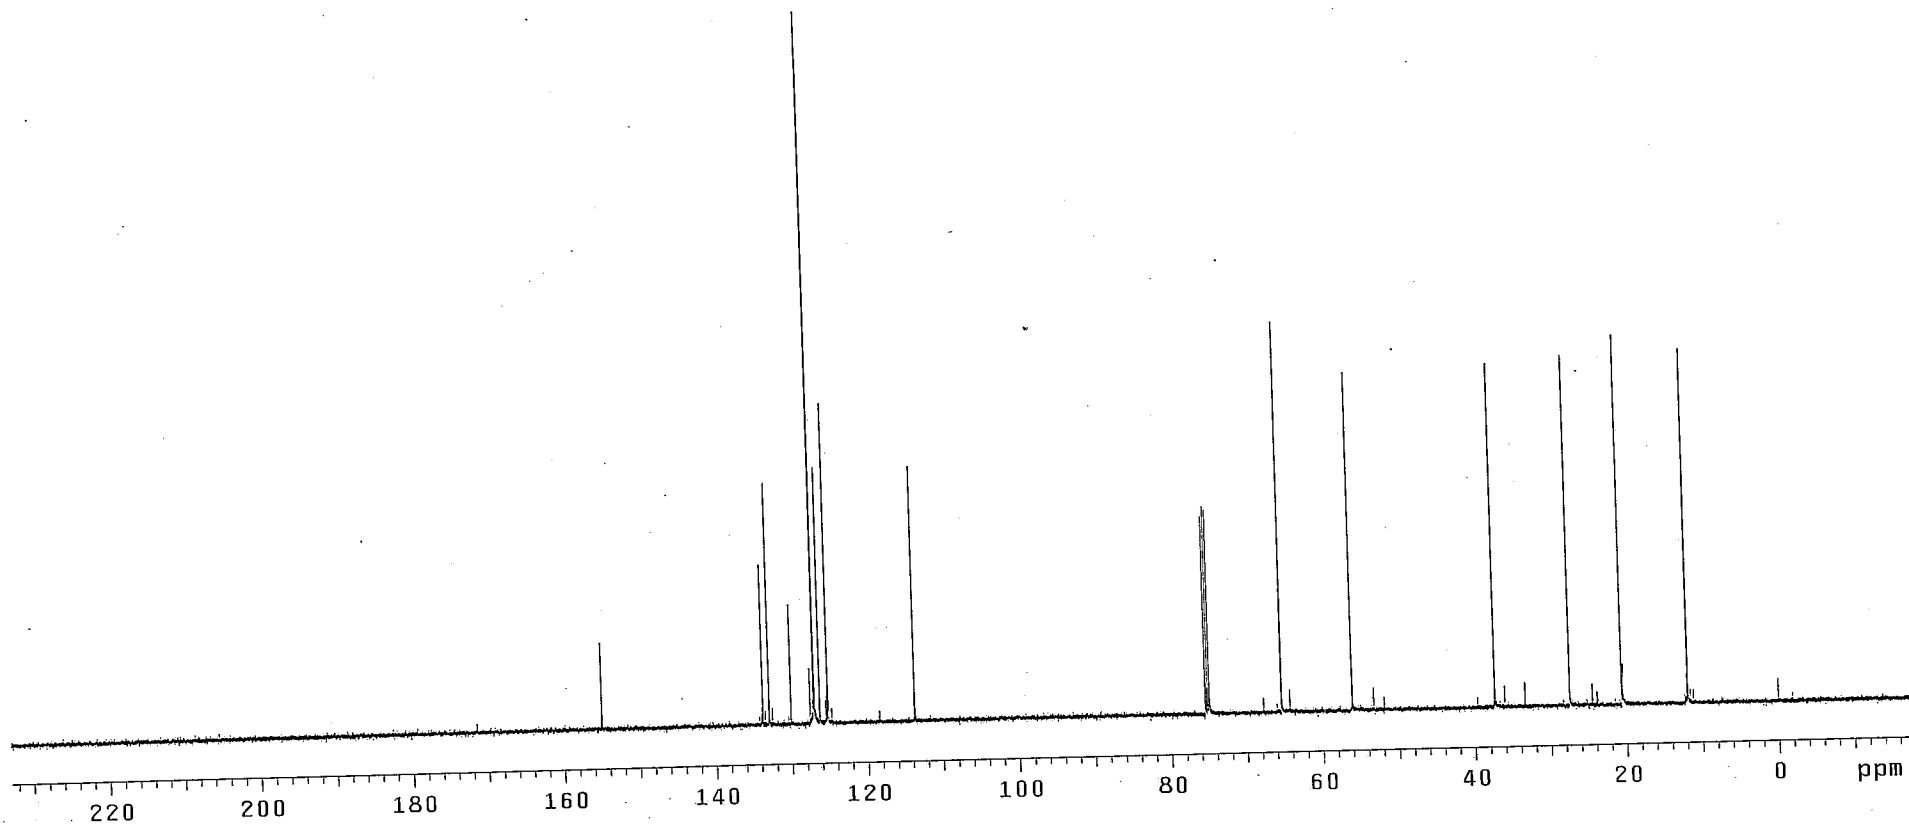

S103

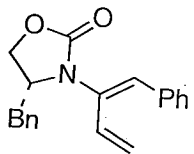

8b

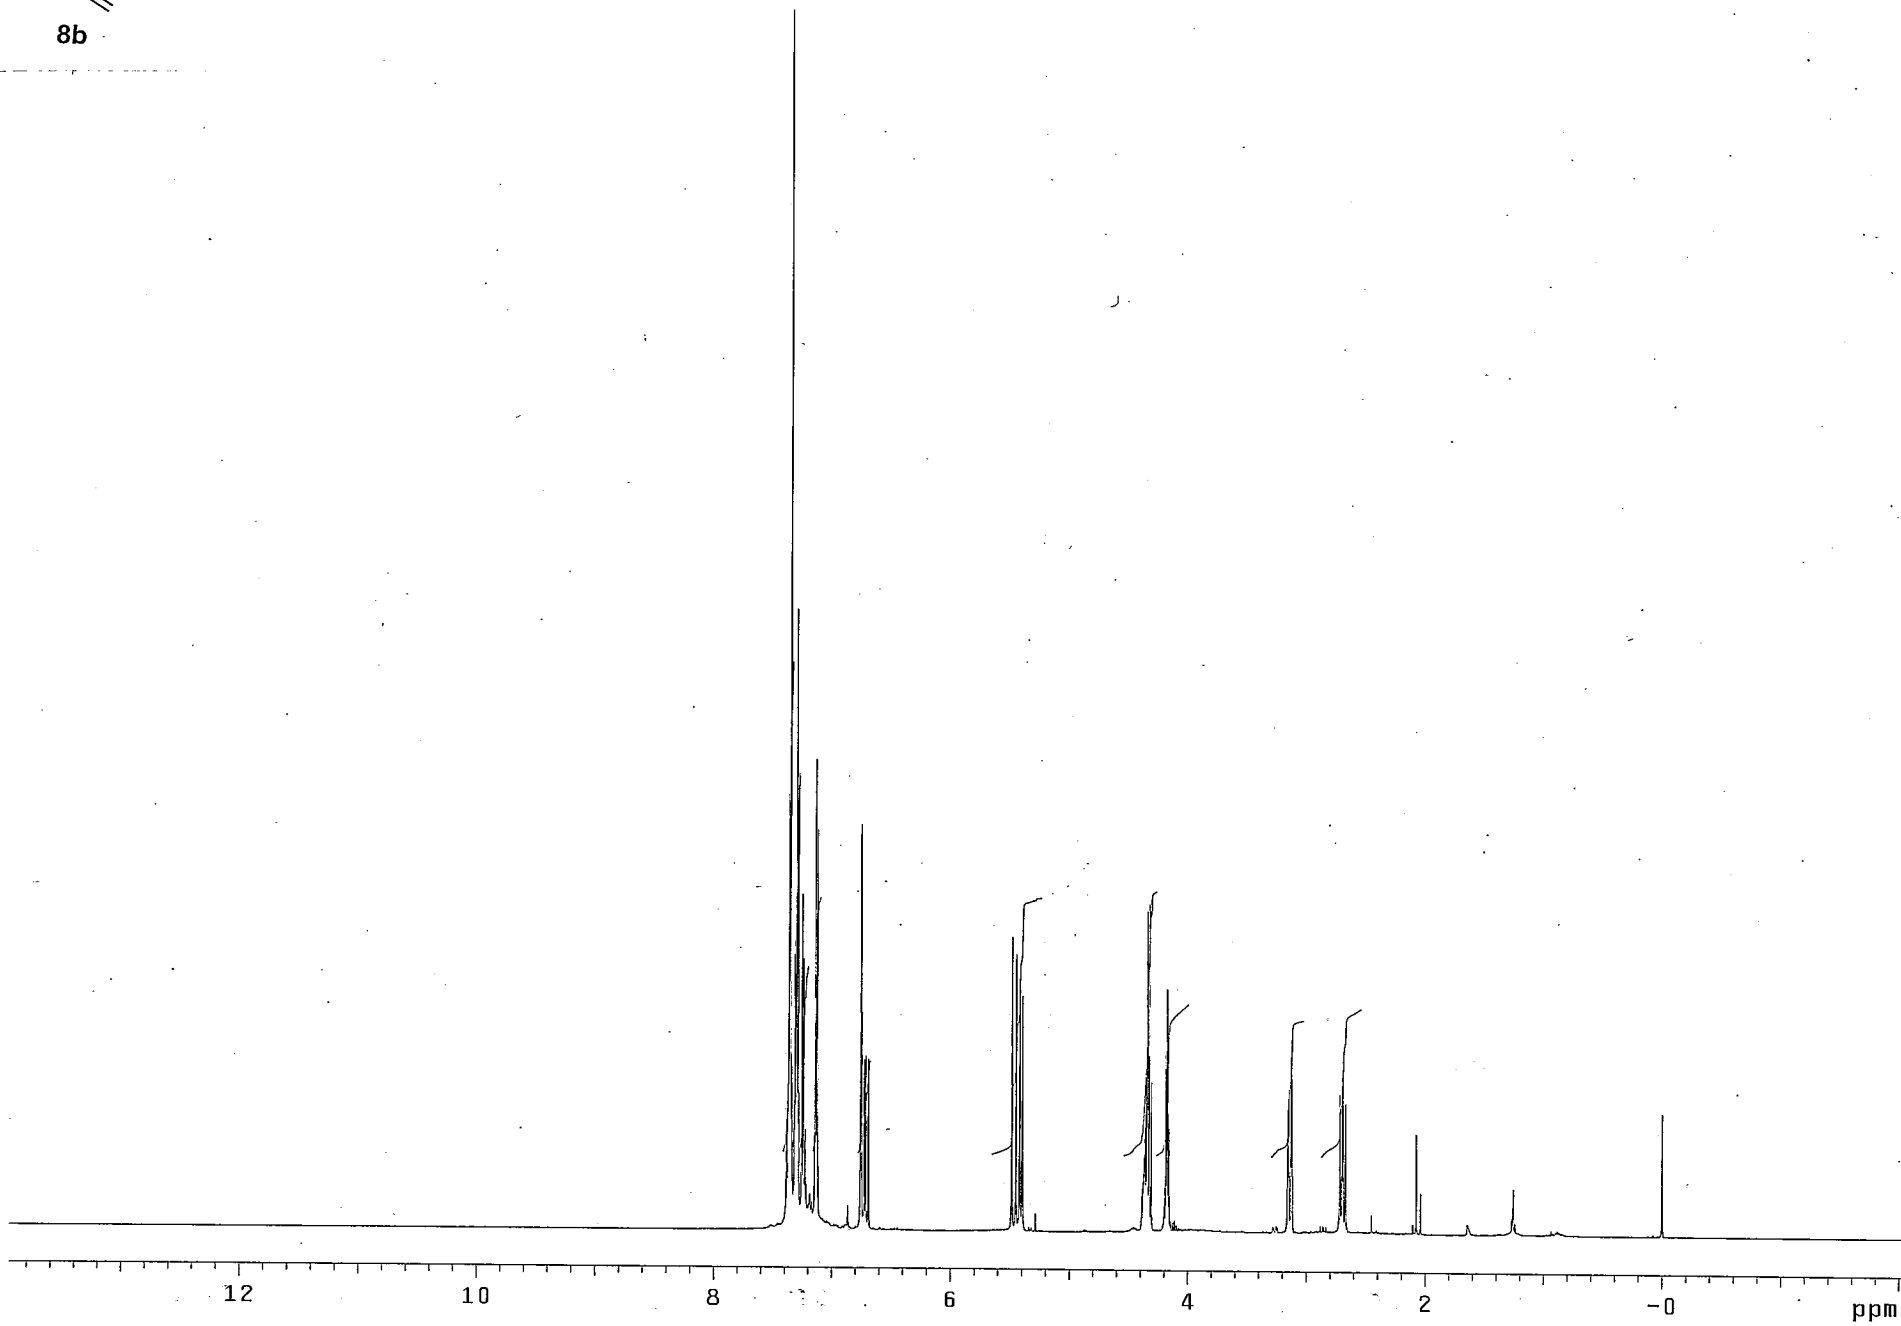

S104

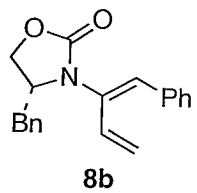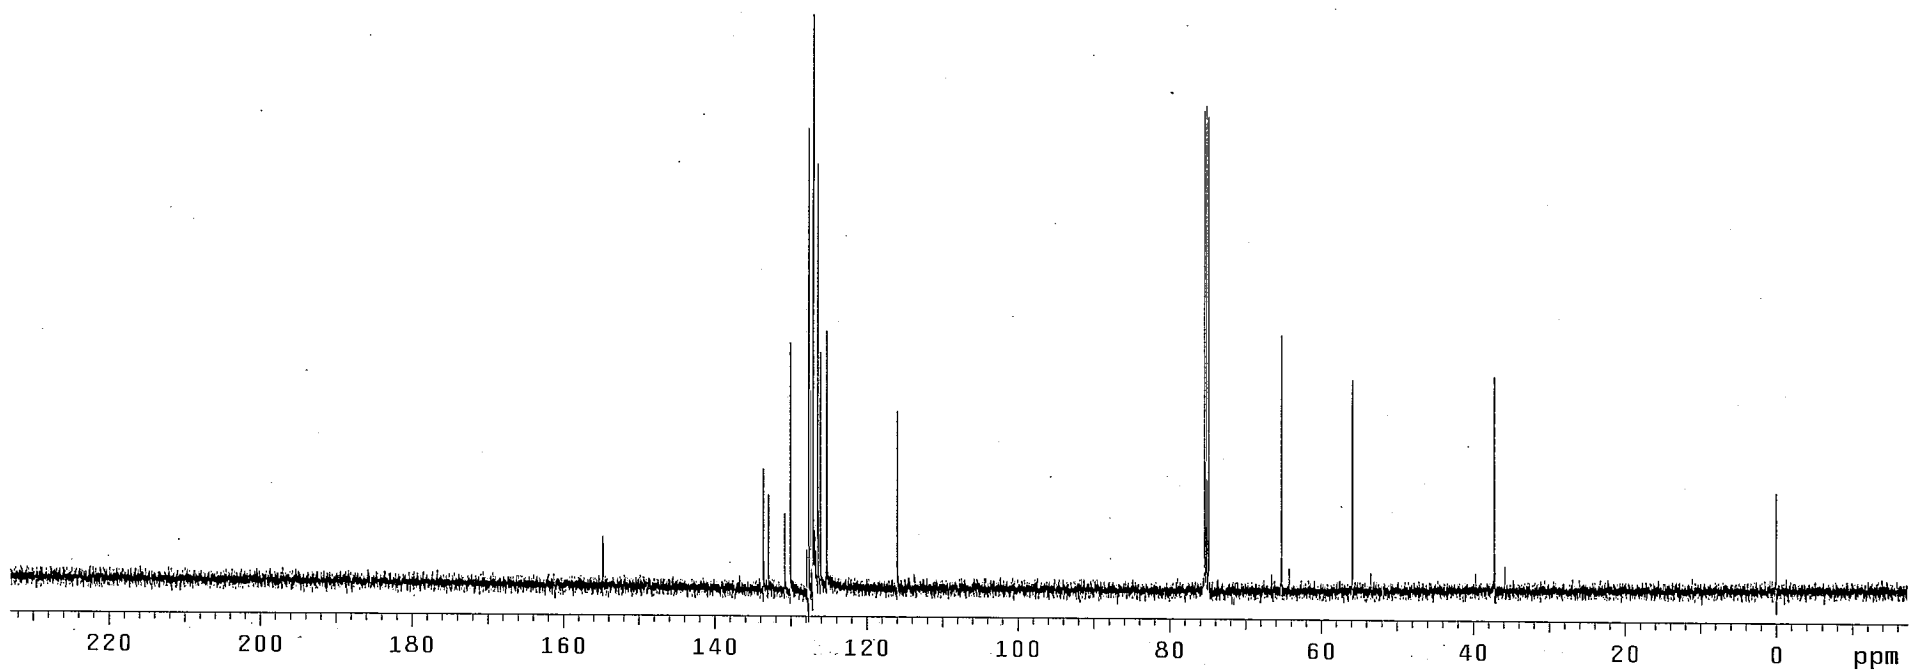

S105

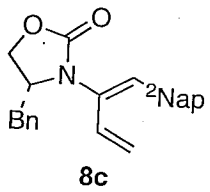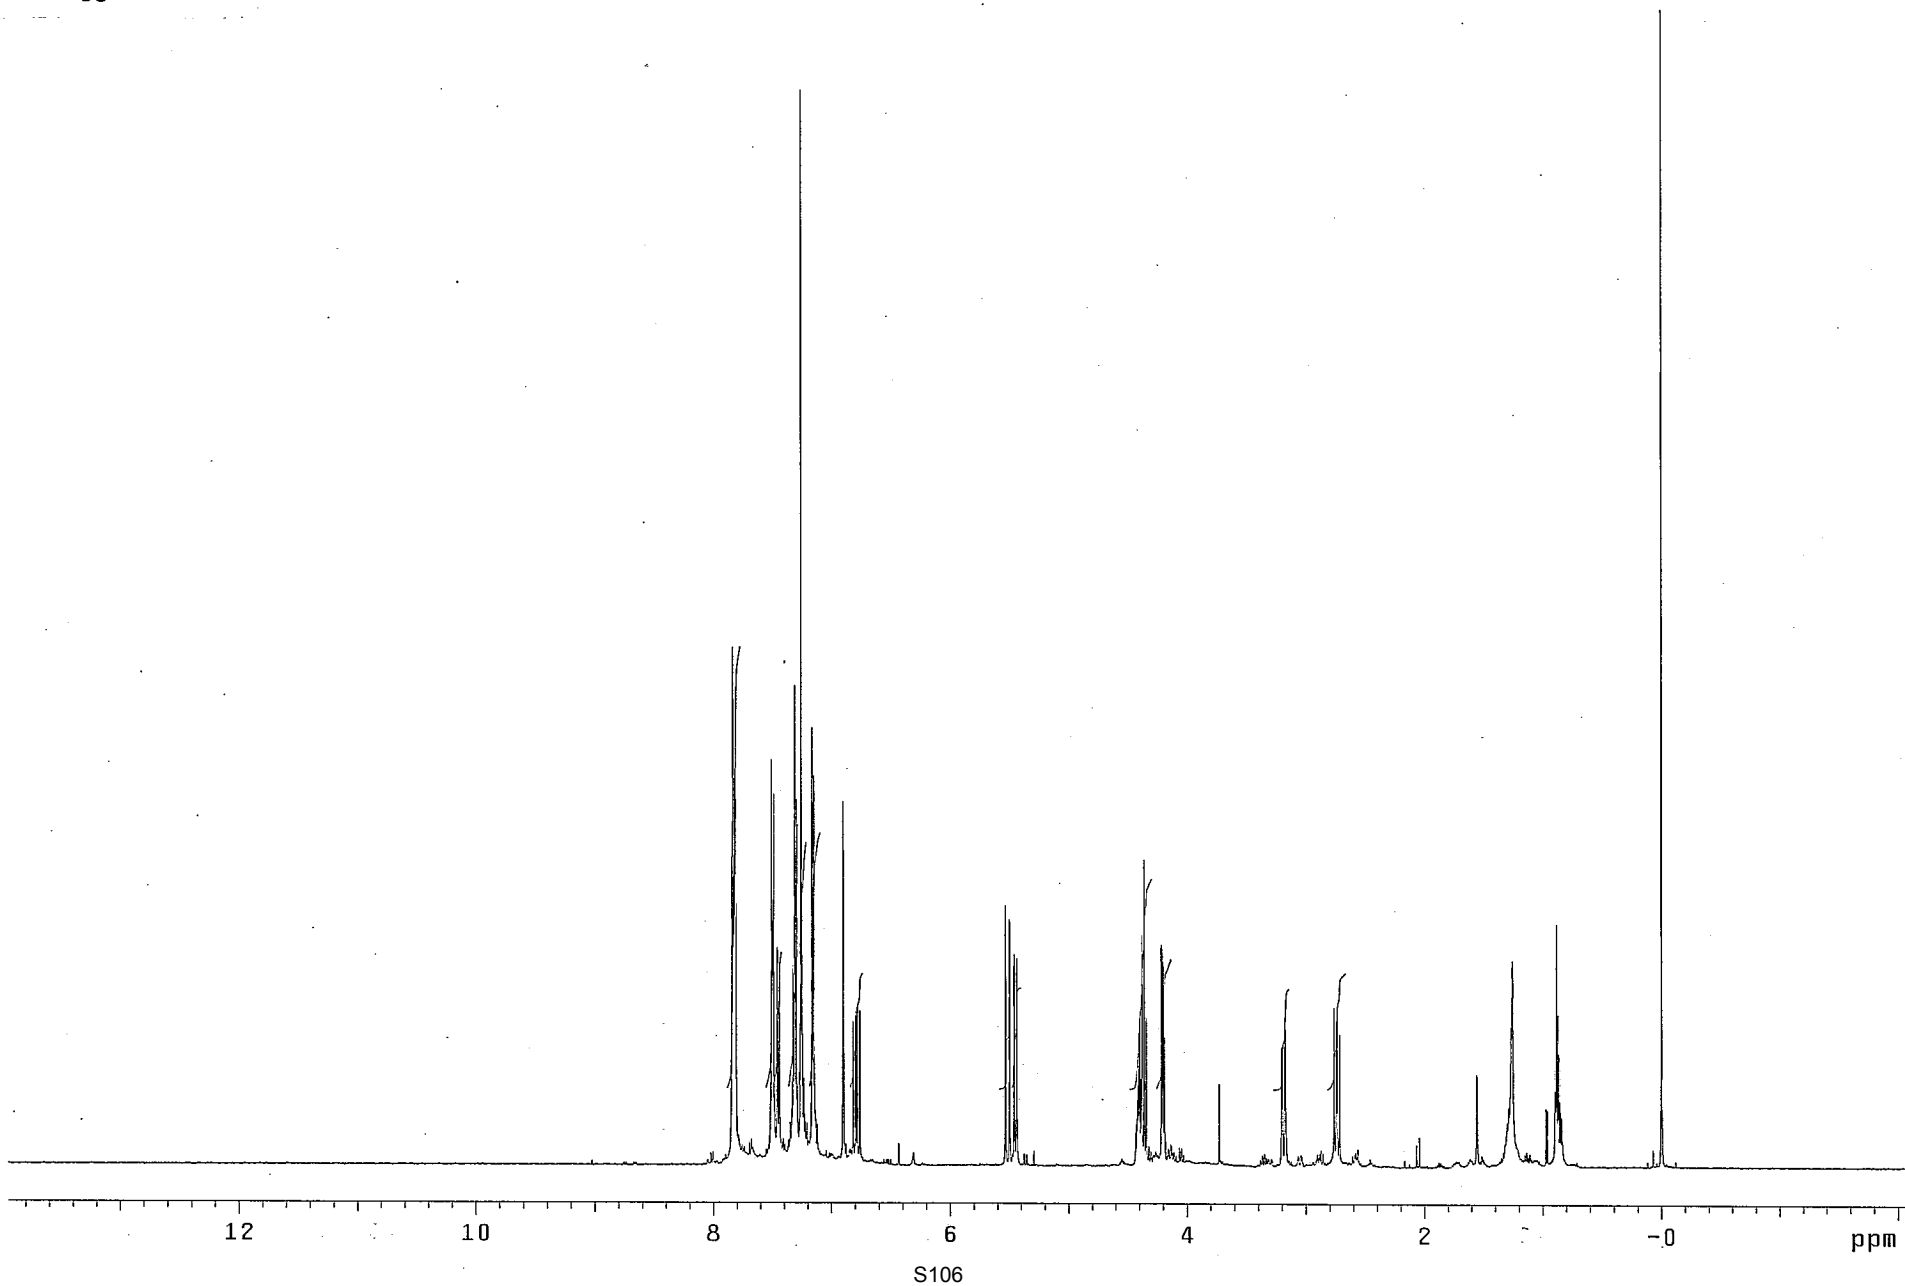

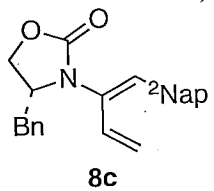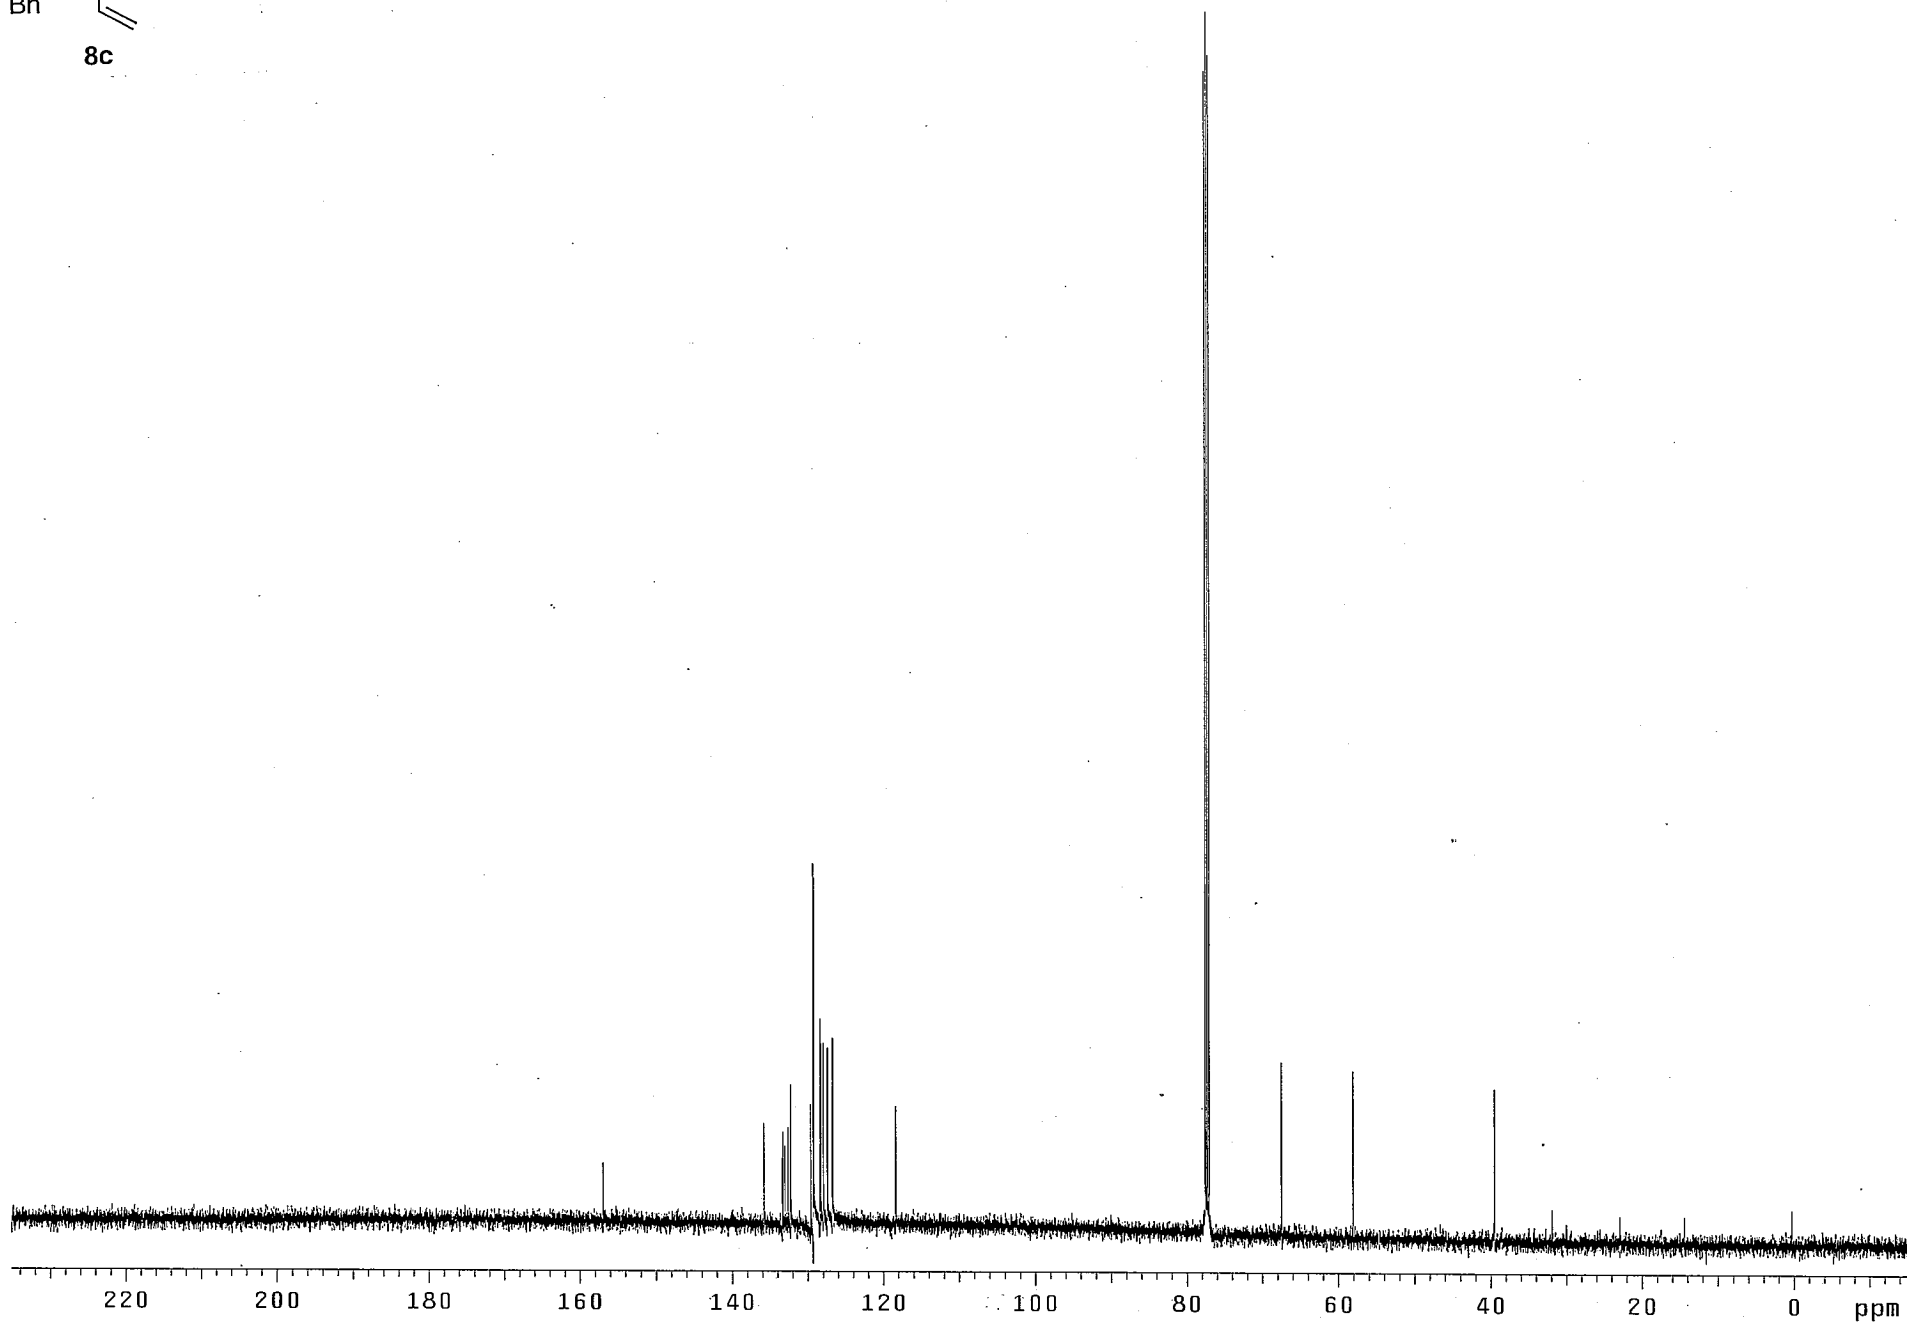

S107

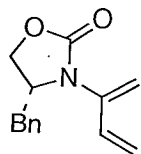

8d

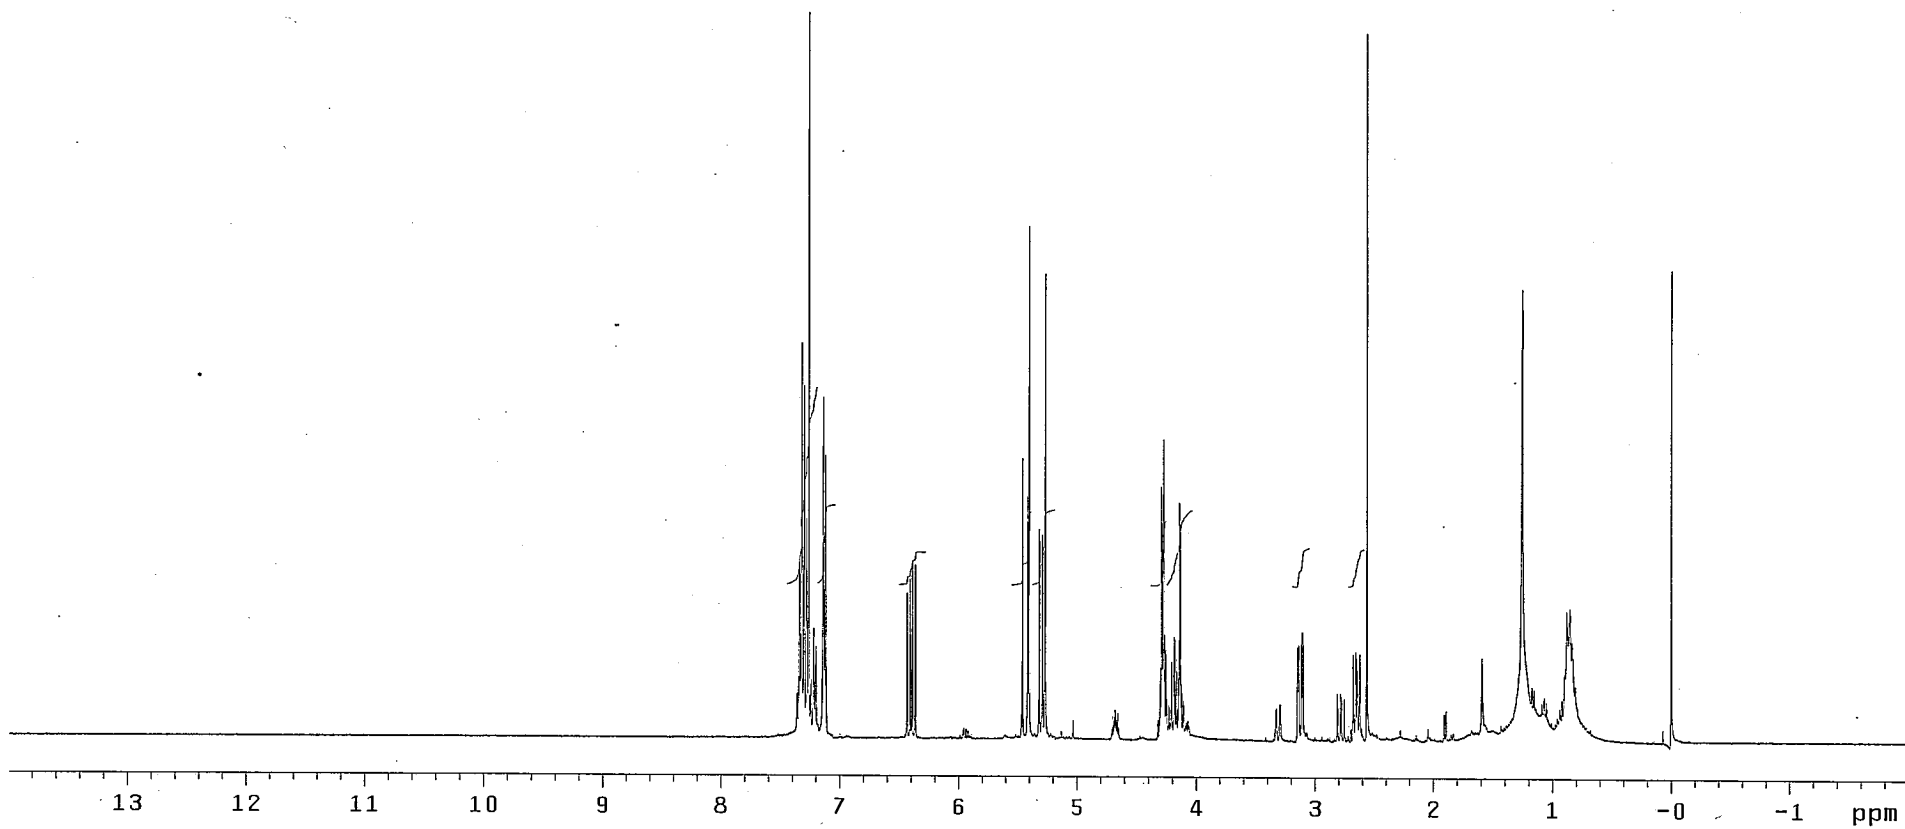

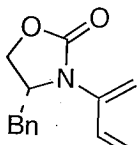

8d

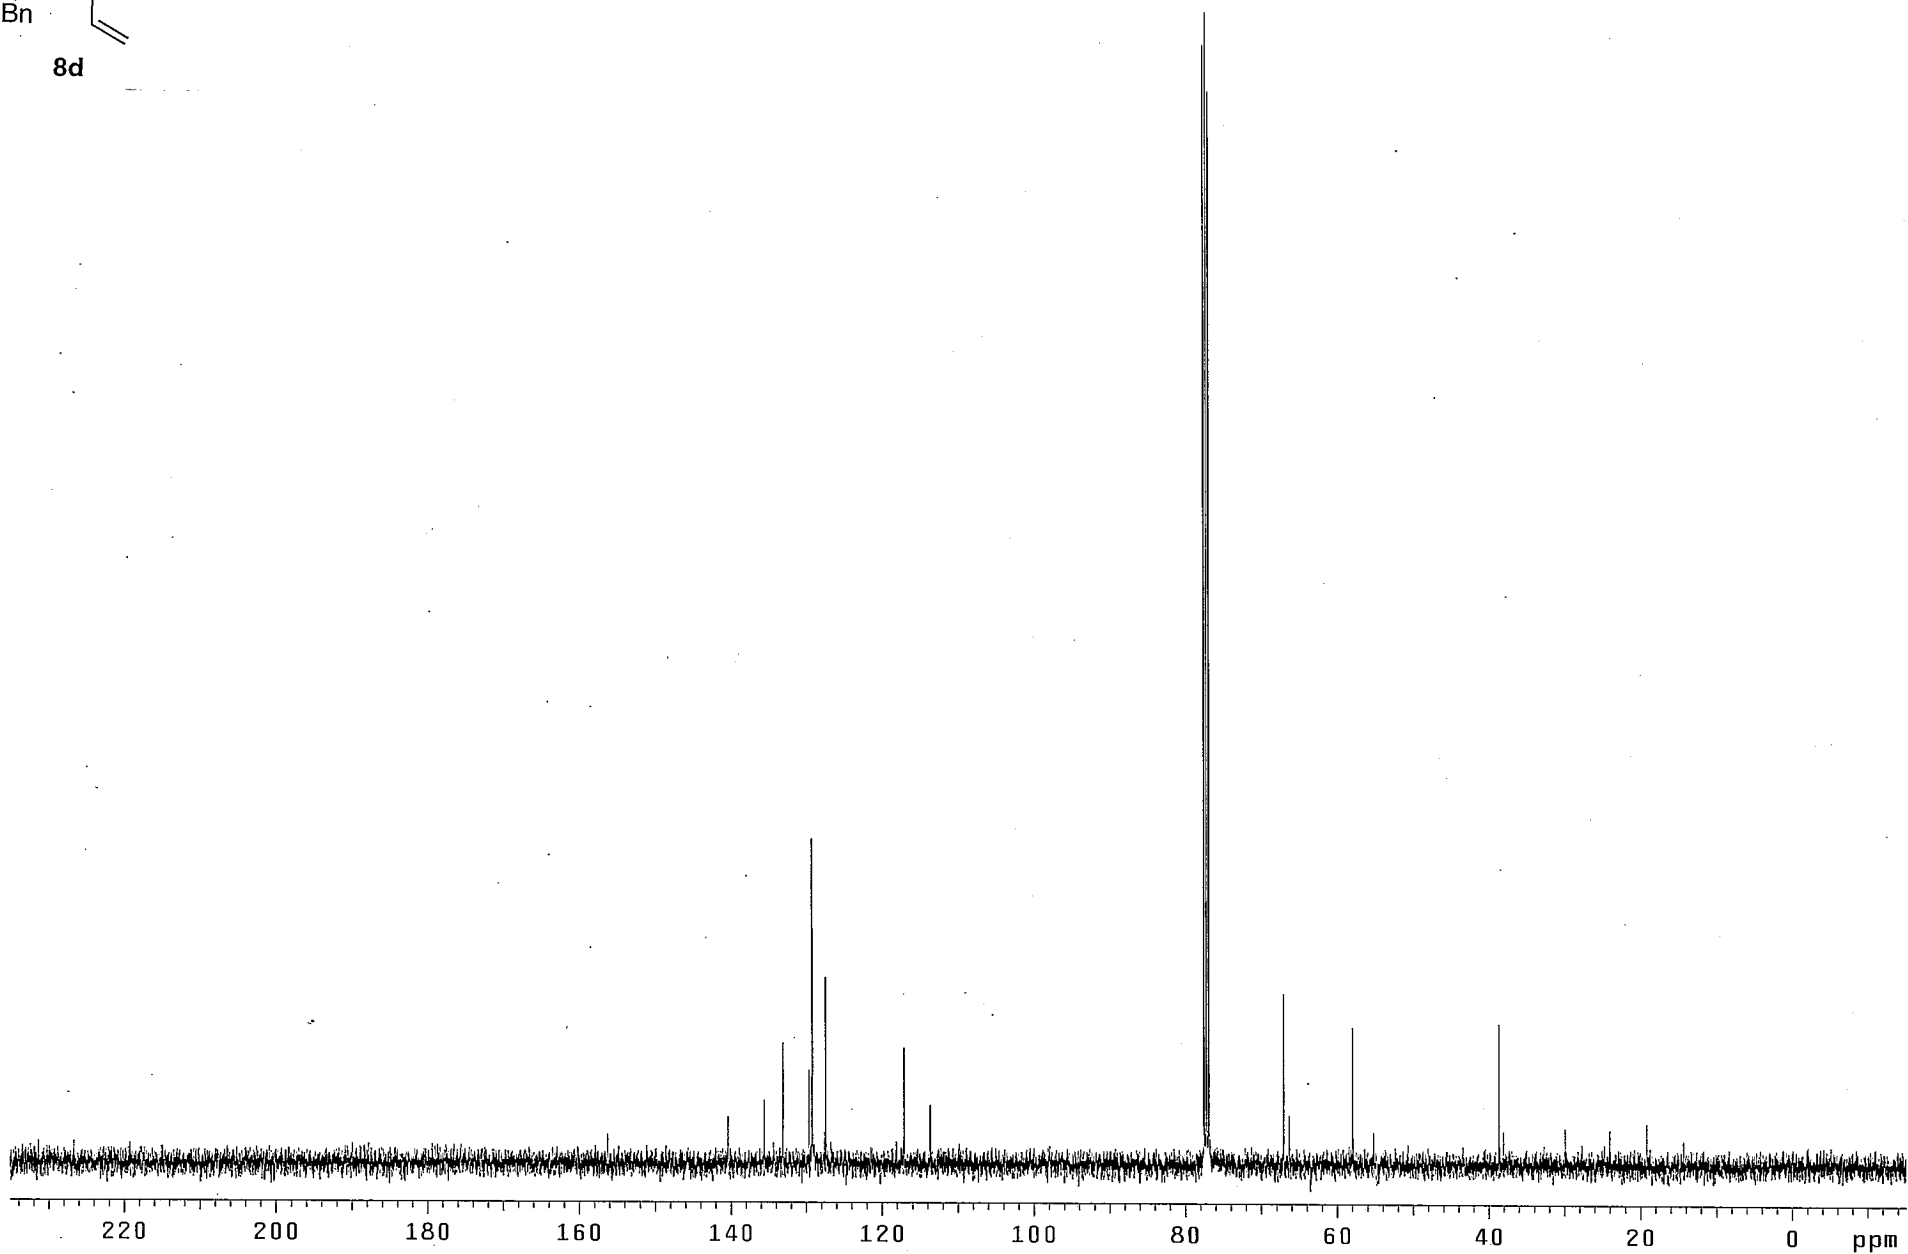



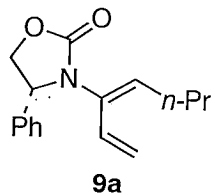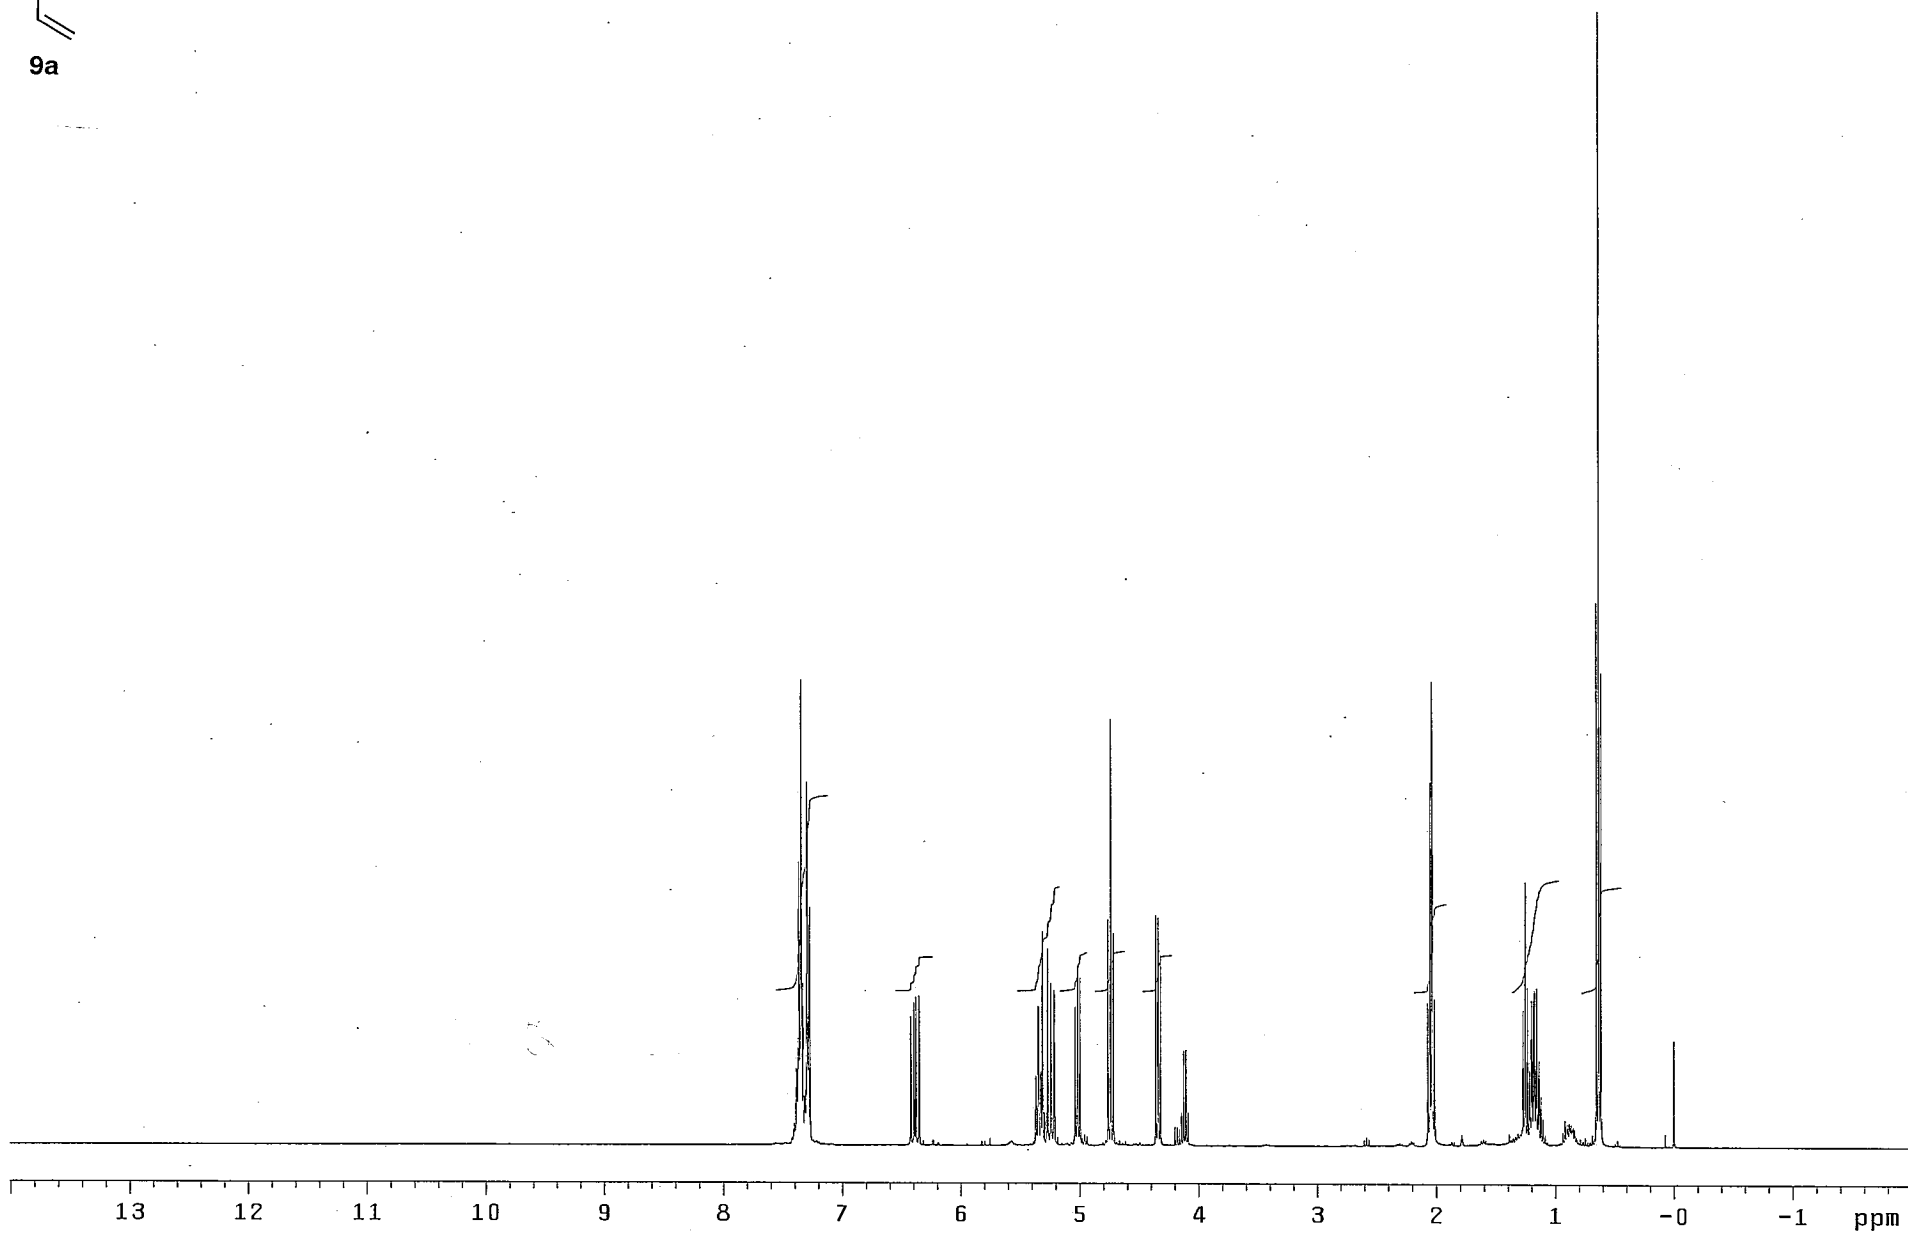

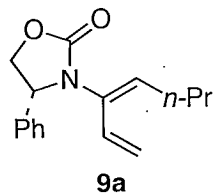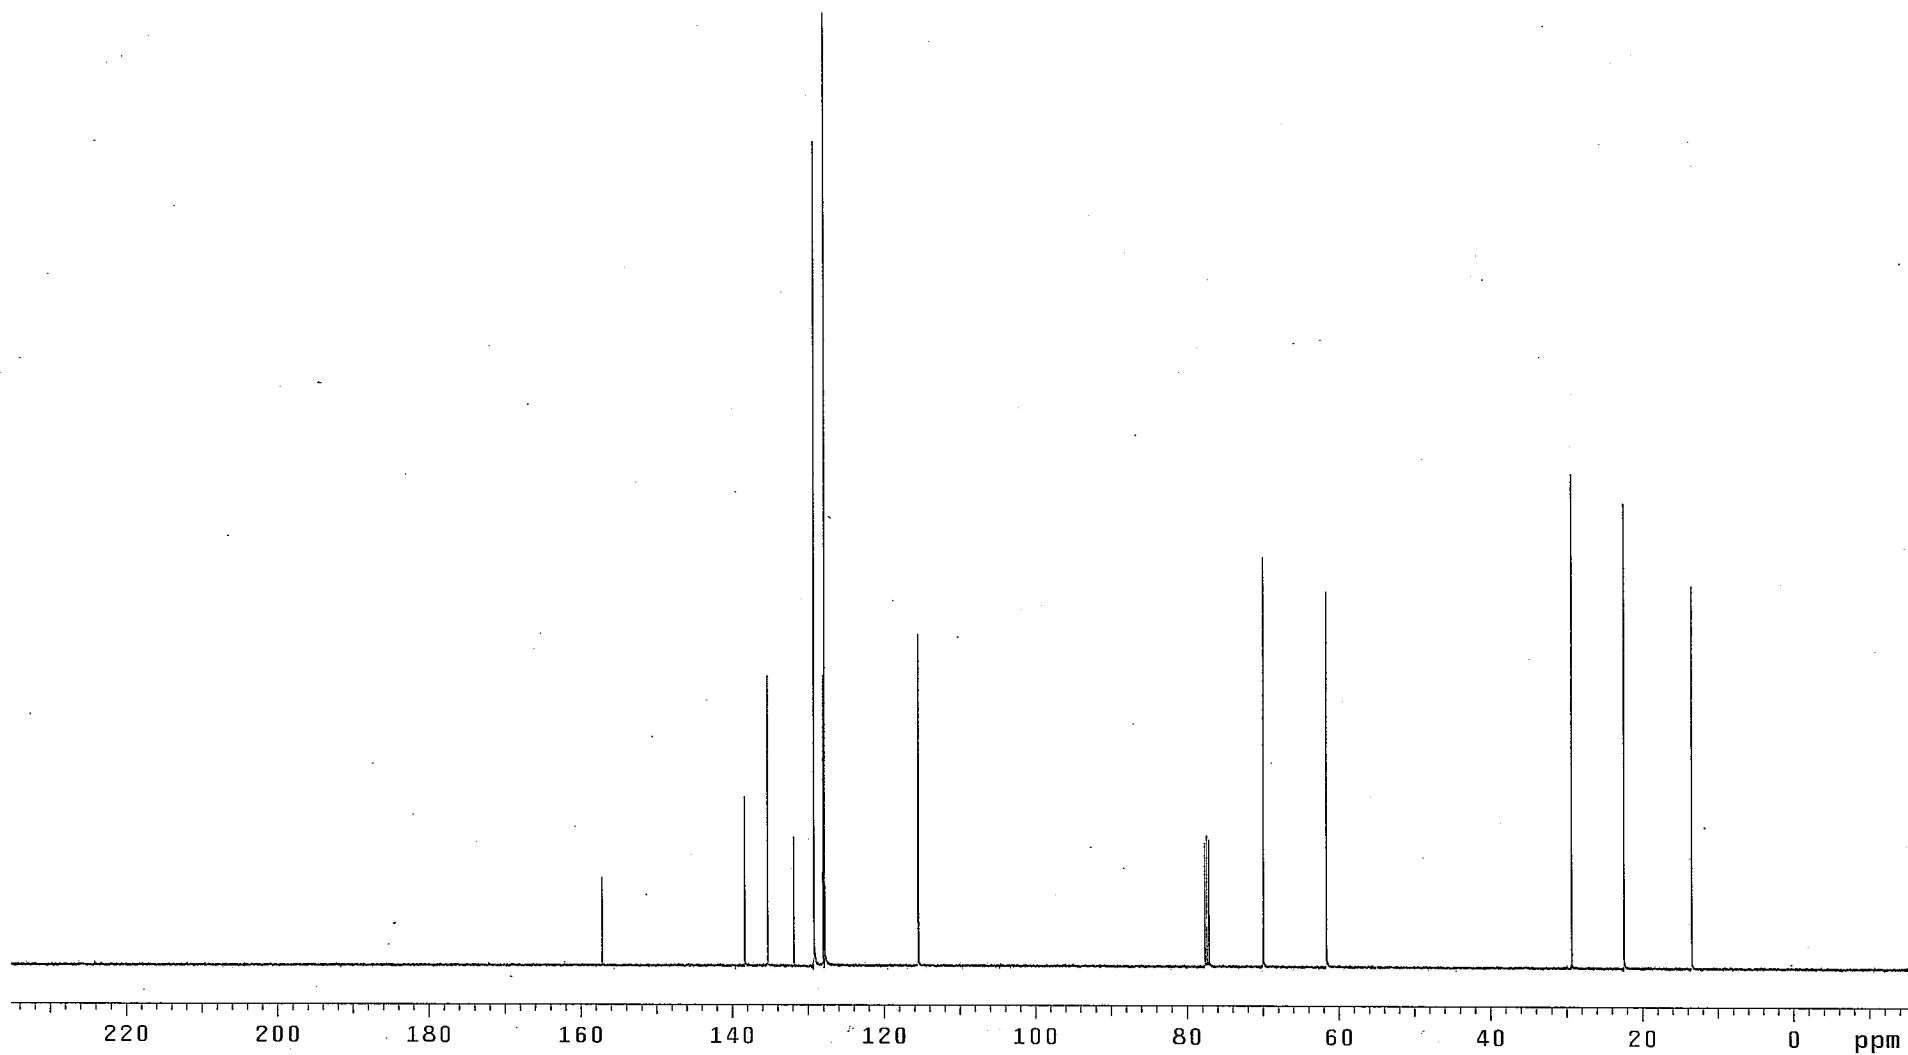

S111

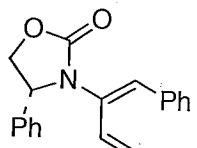

9b

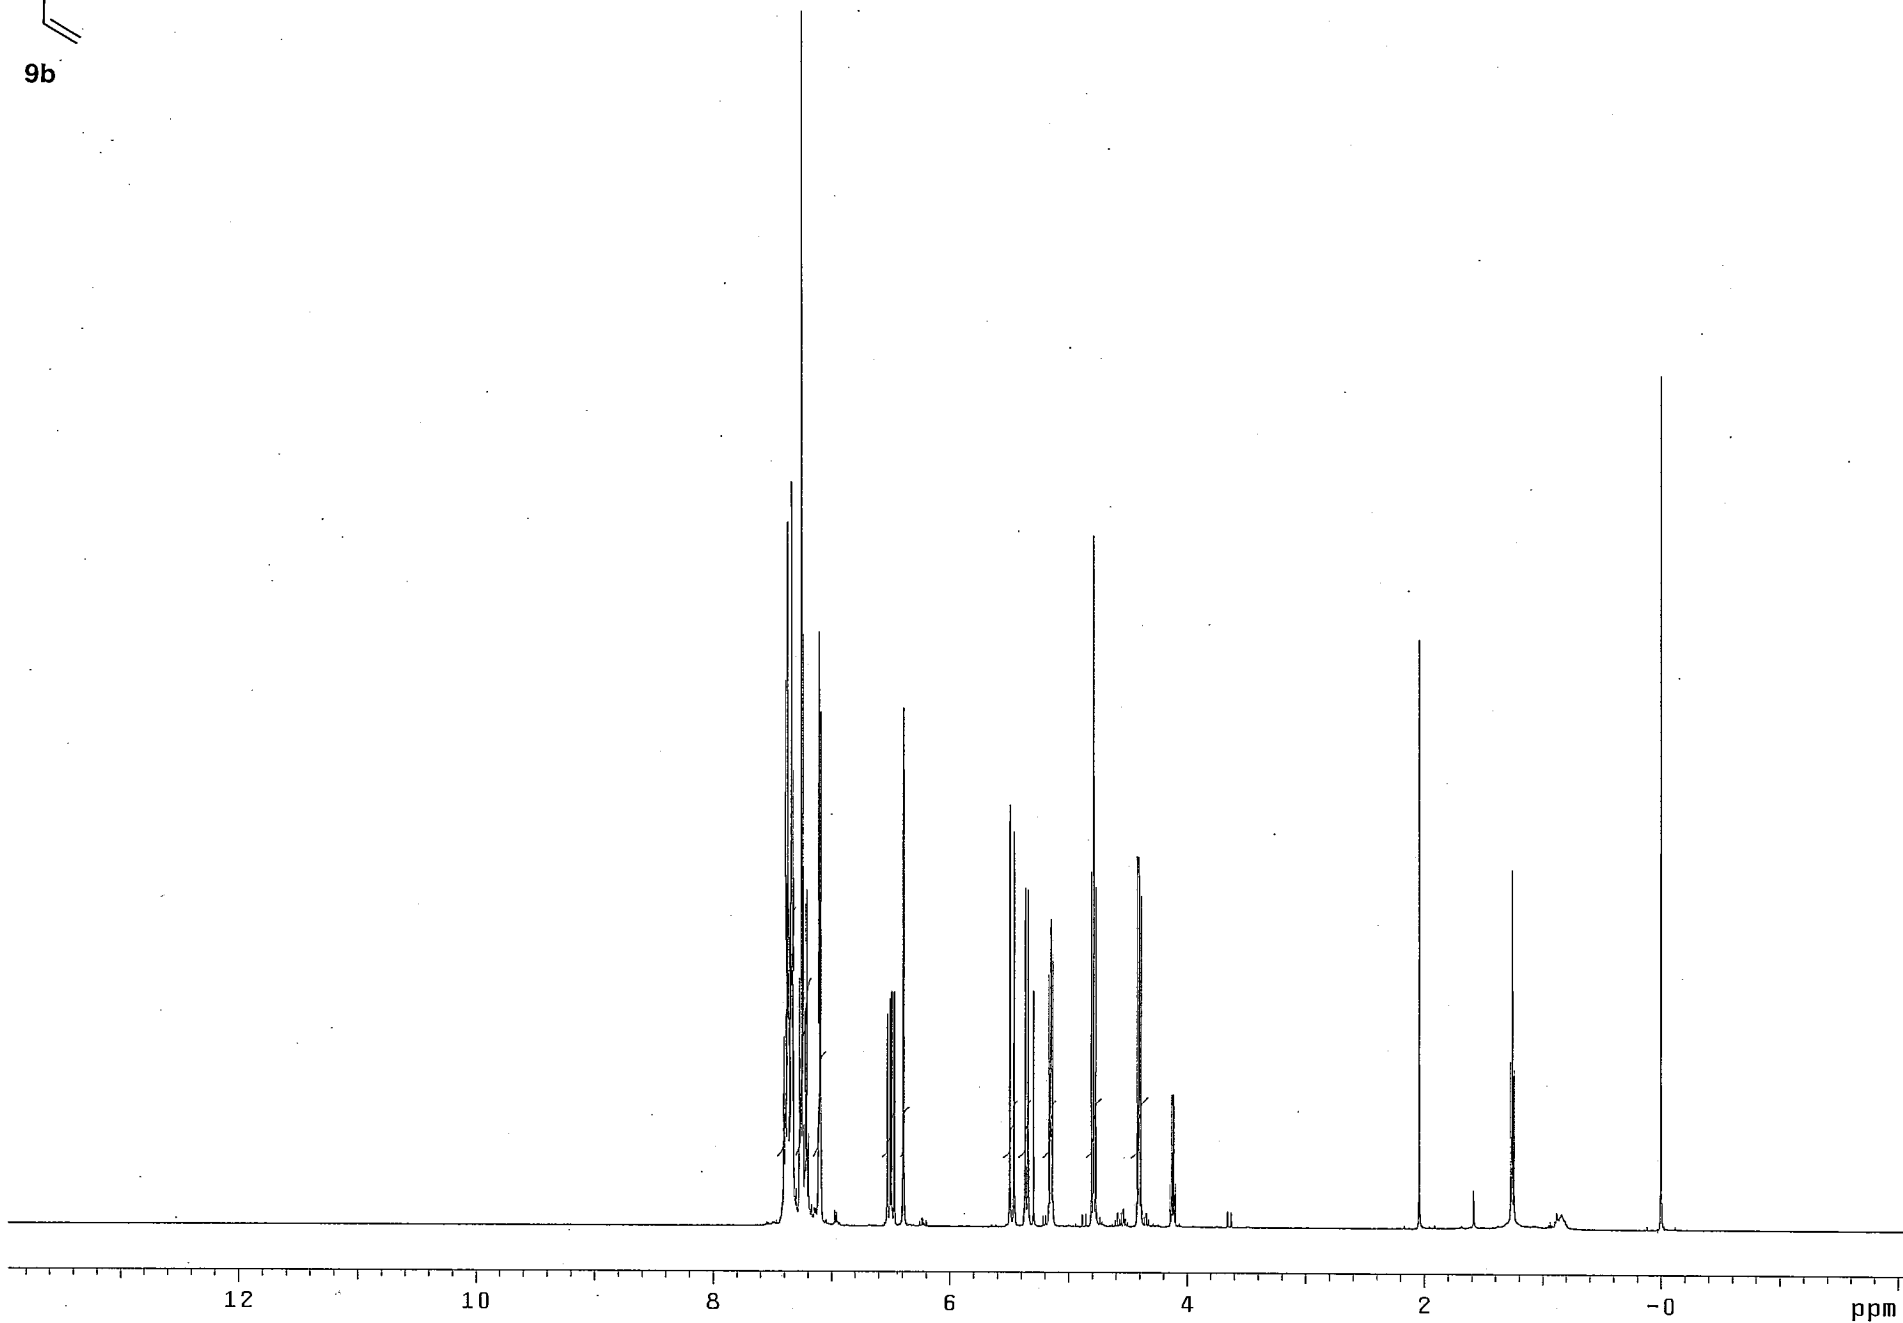

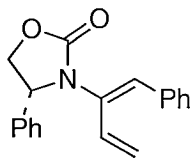

9b

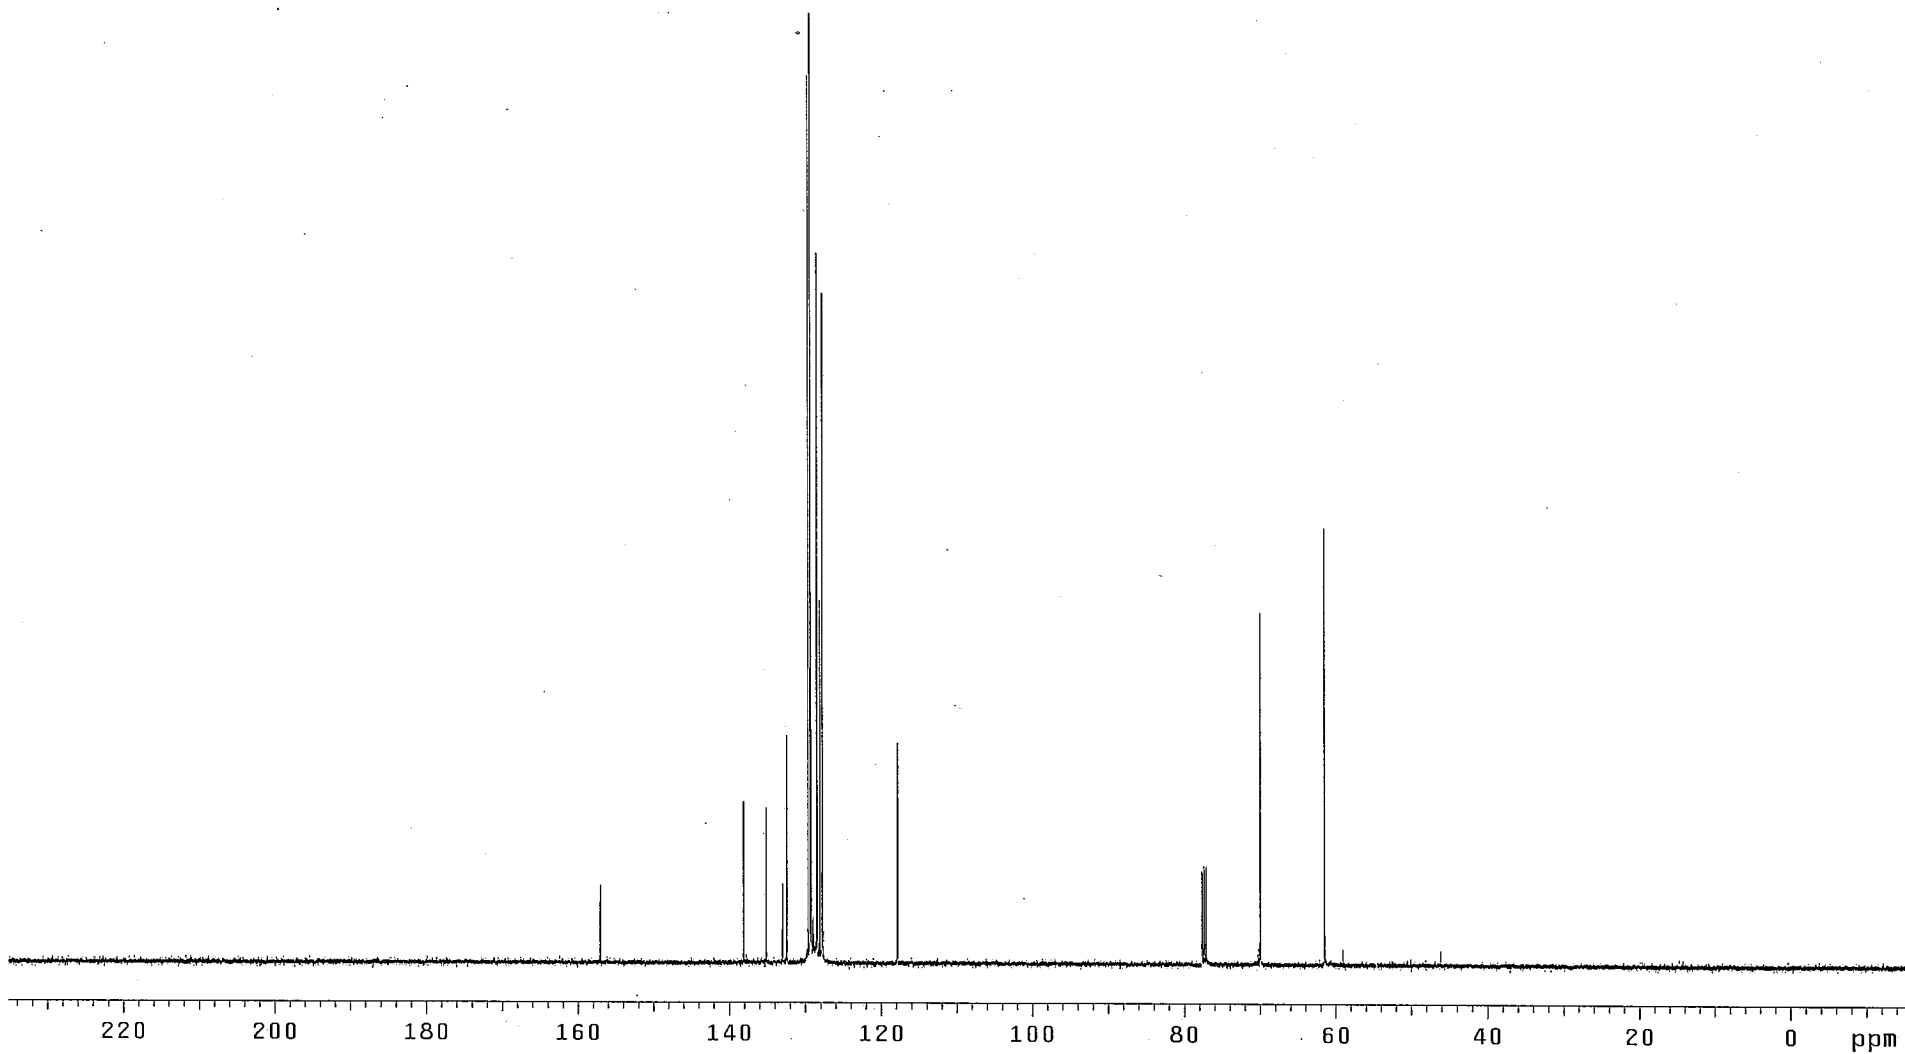

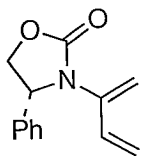

9c

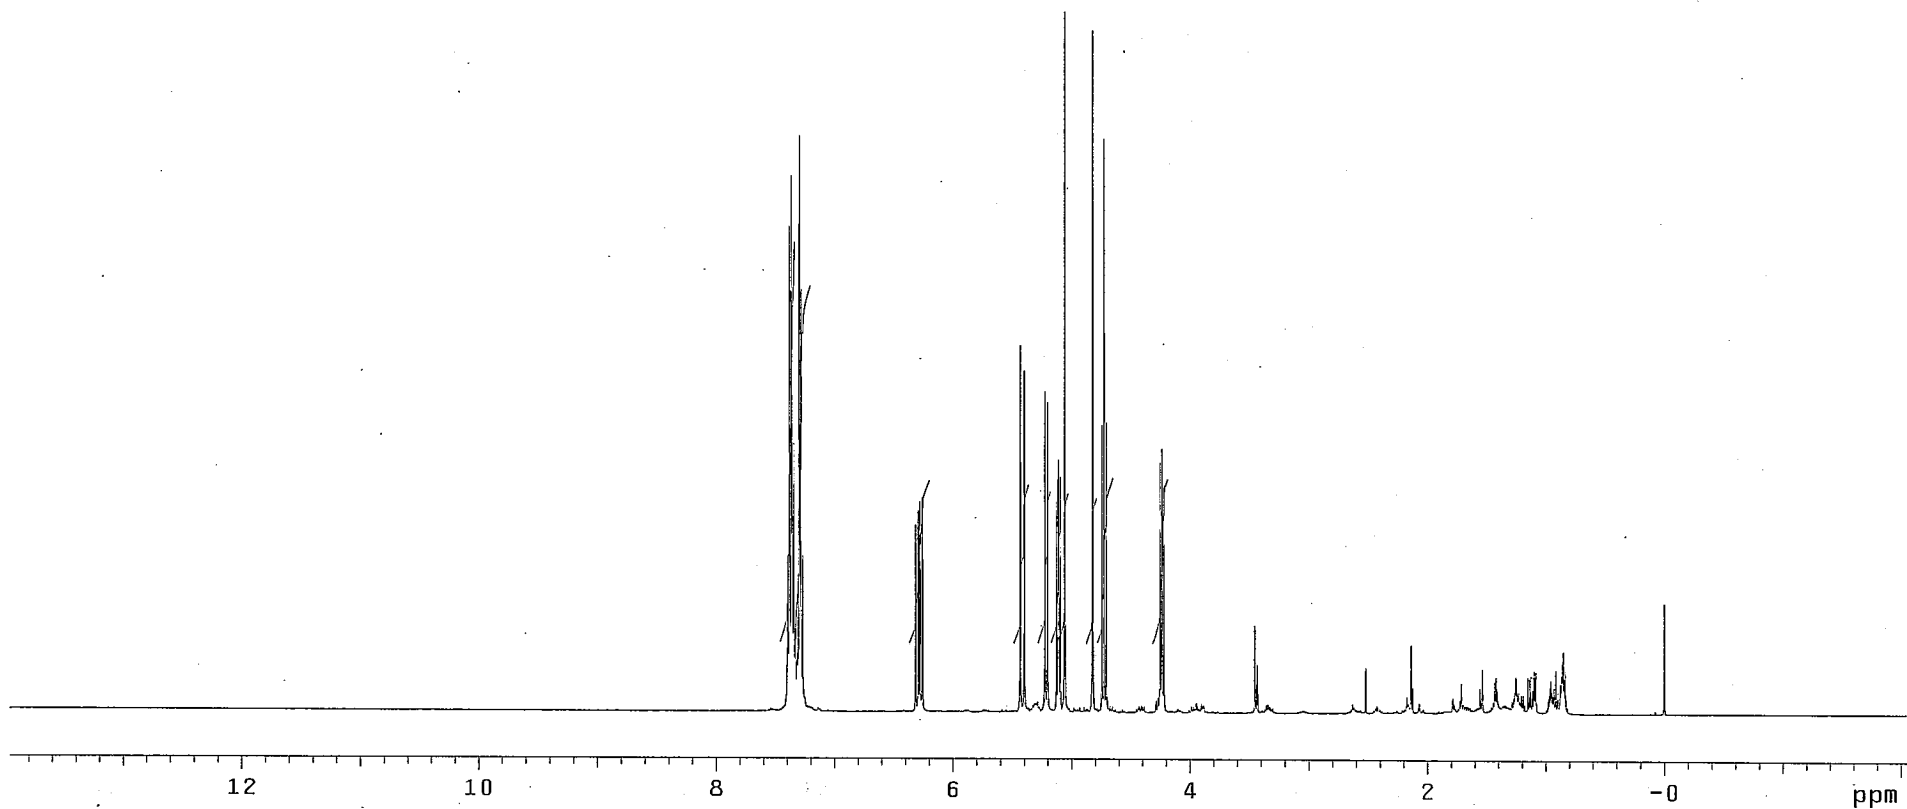

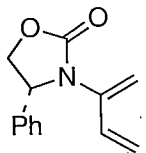

9c

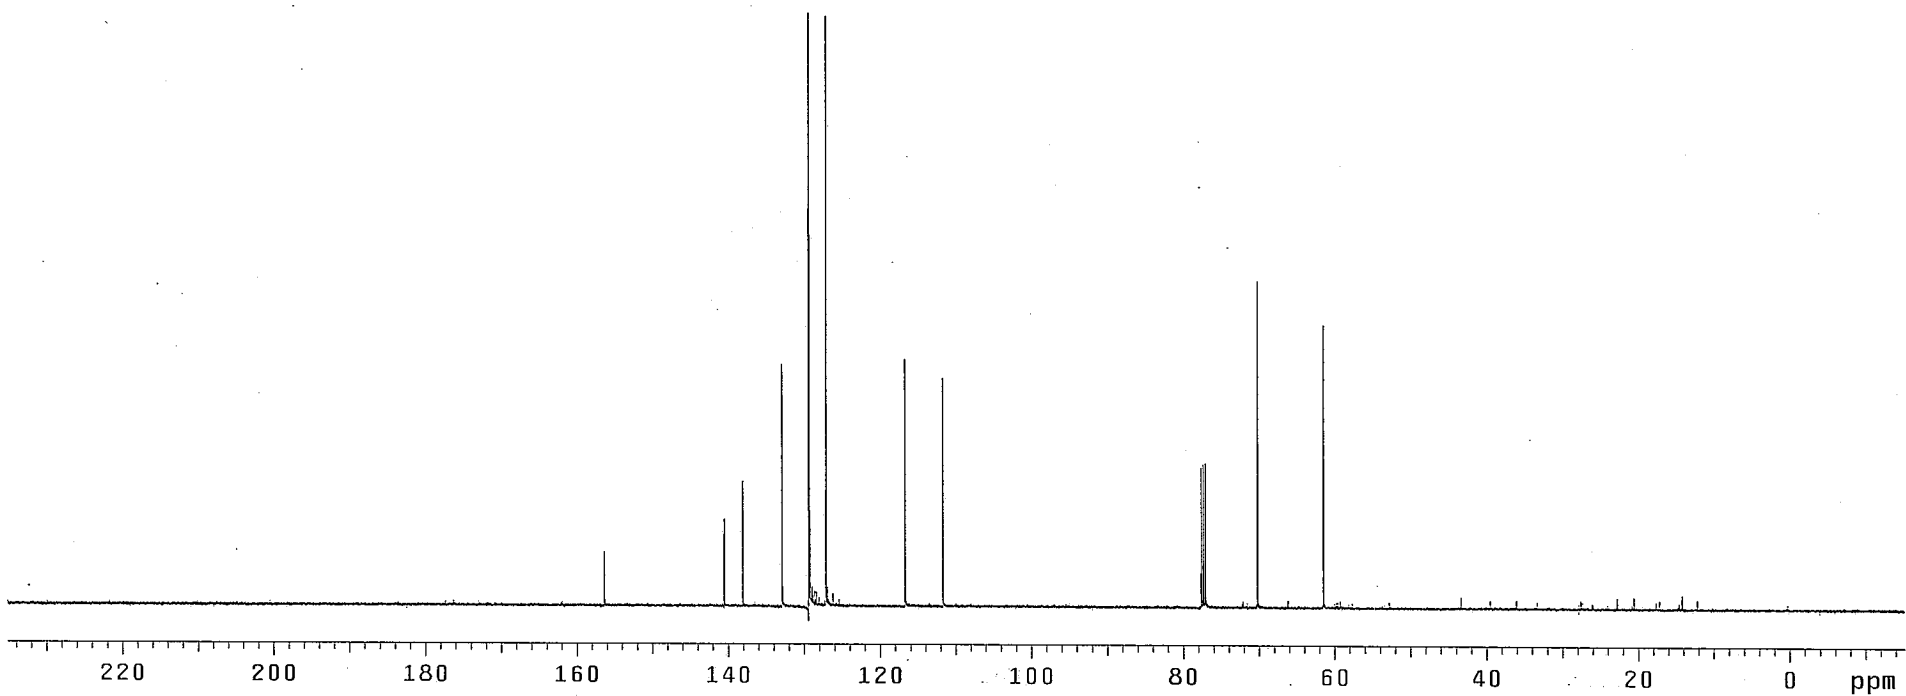

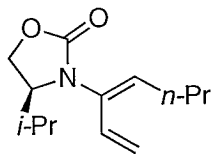

10a

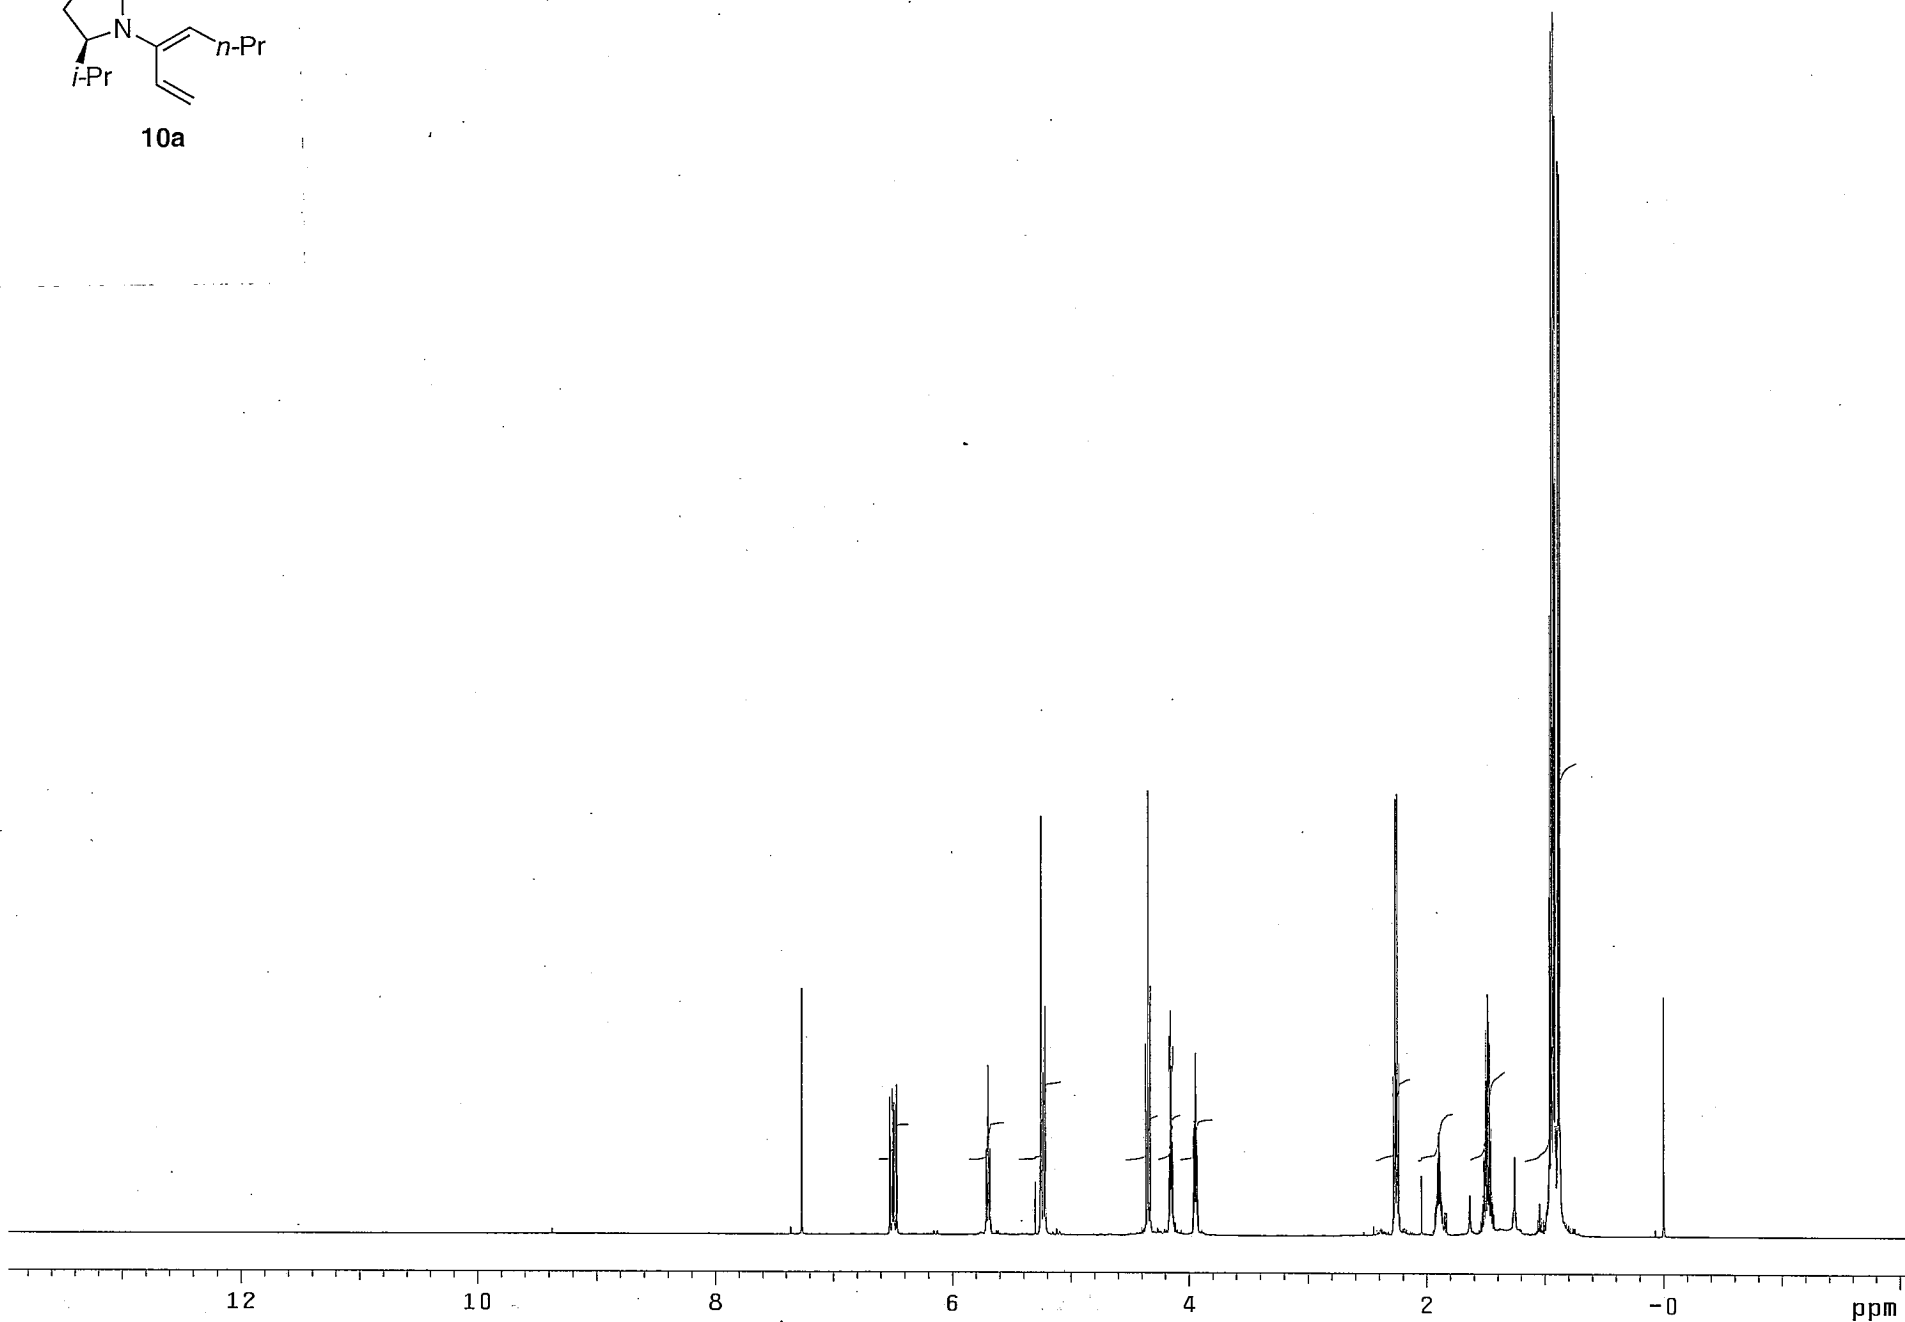

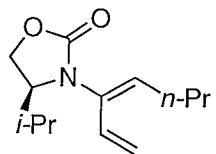

10a

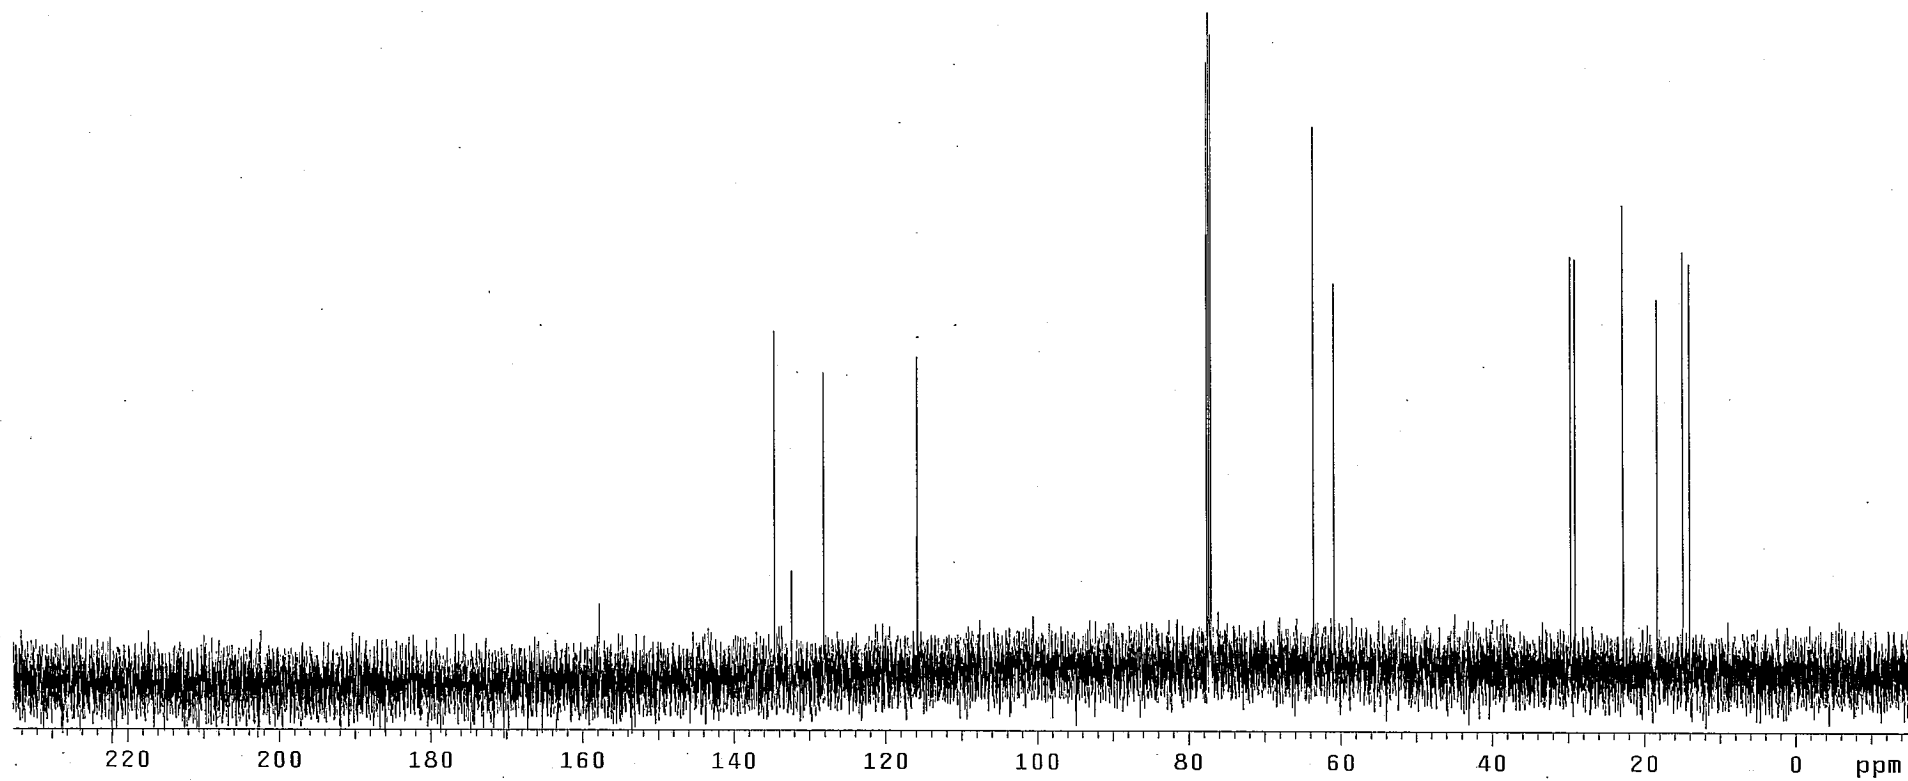



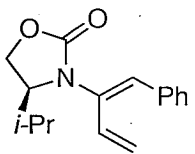

10b

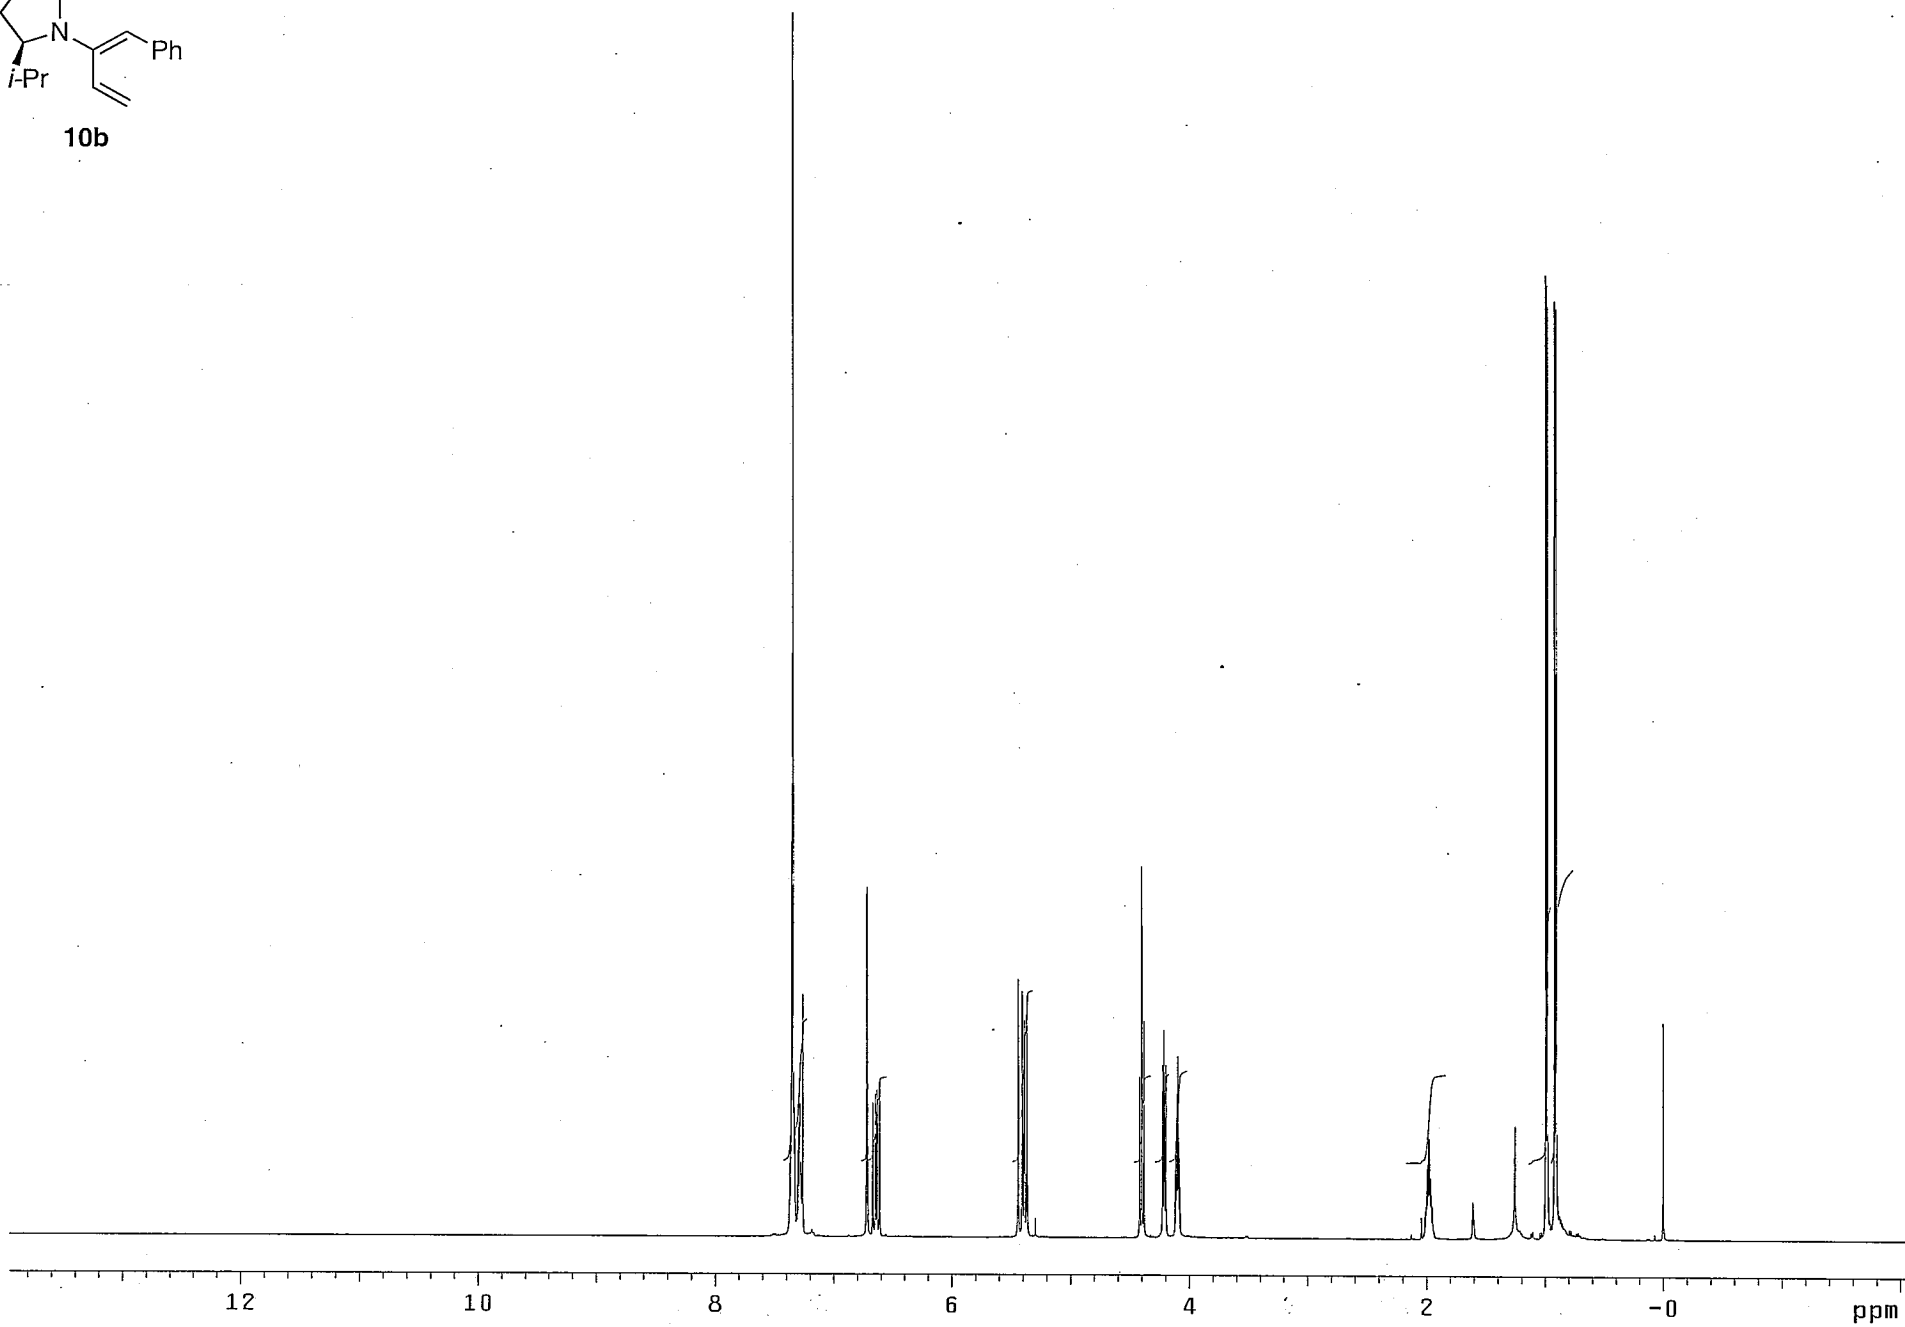

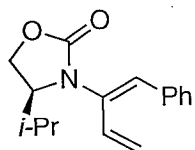

10b

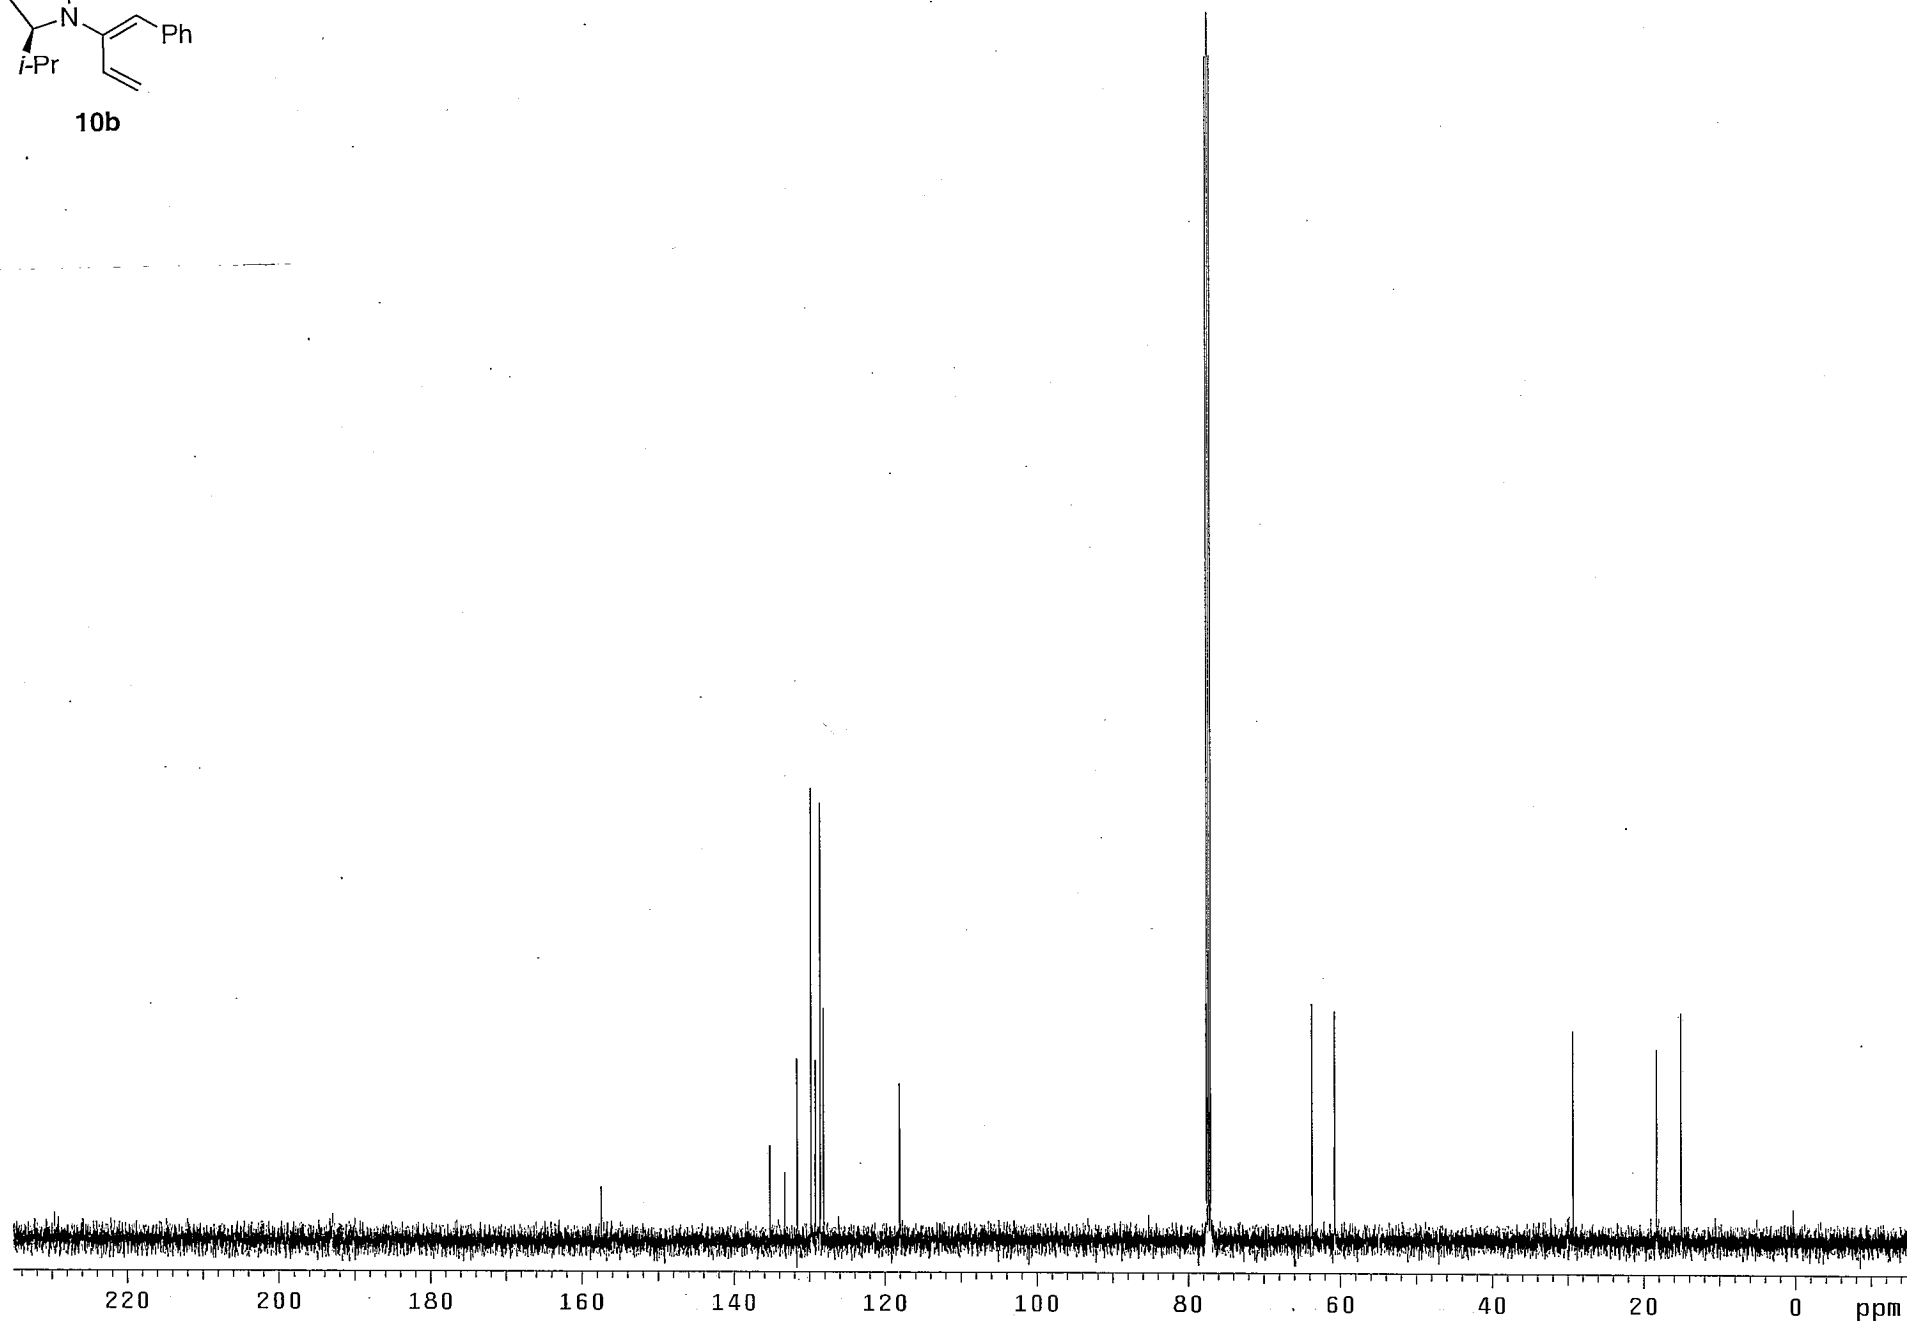

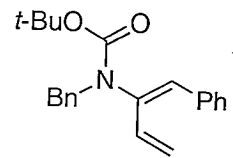

12

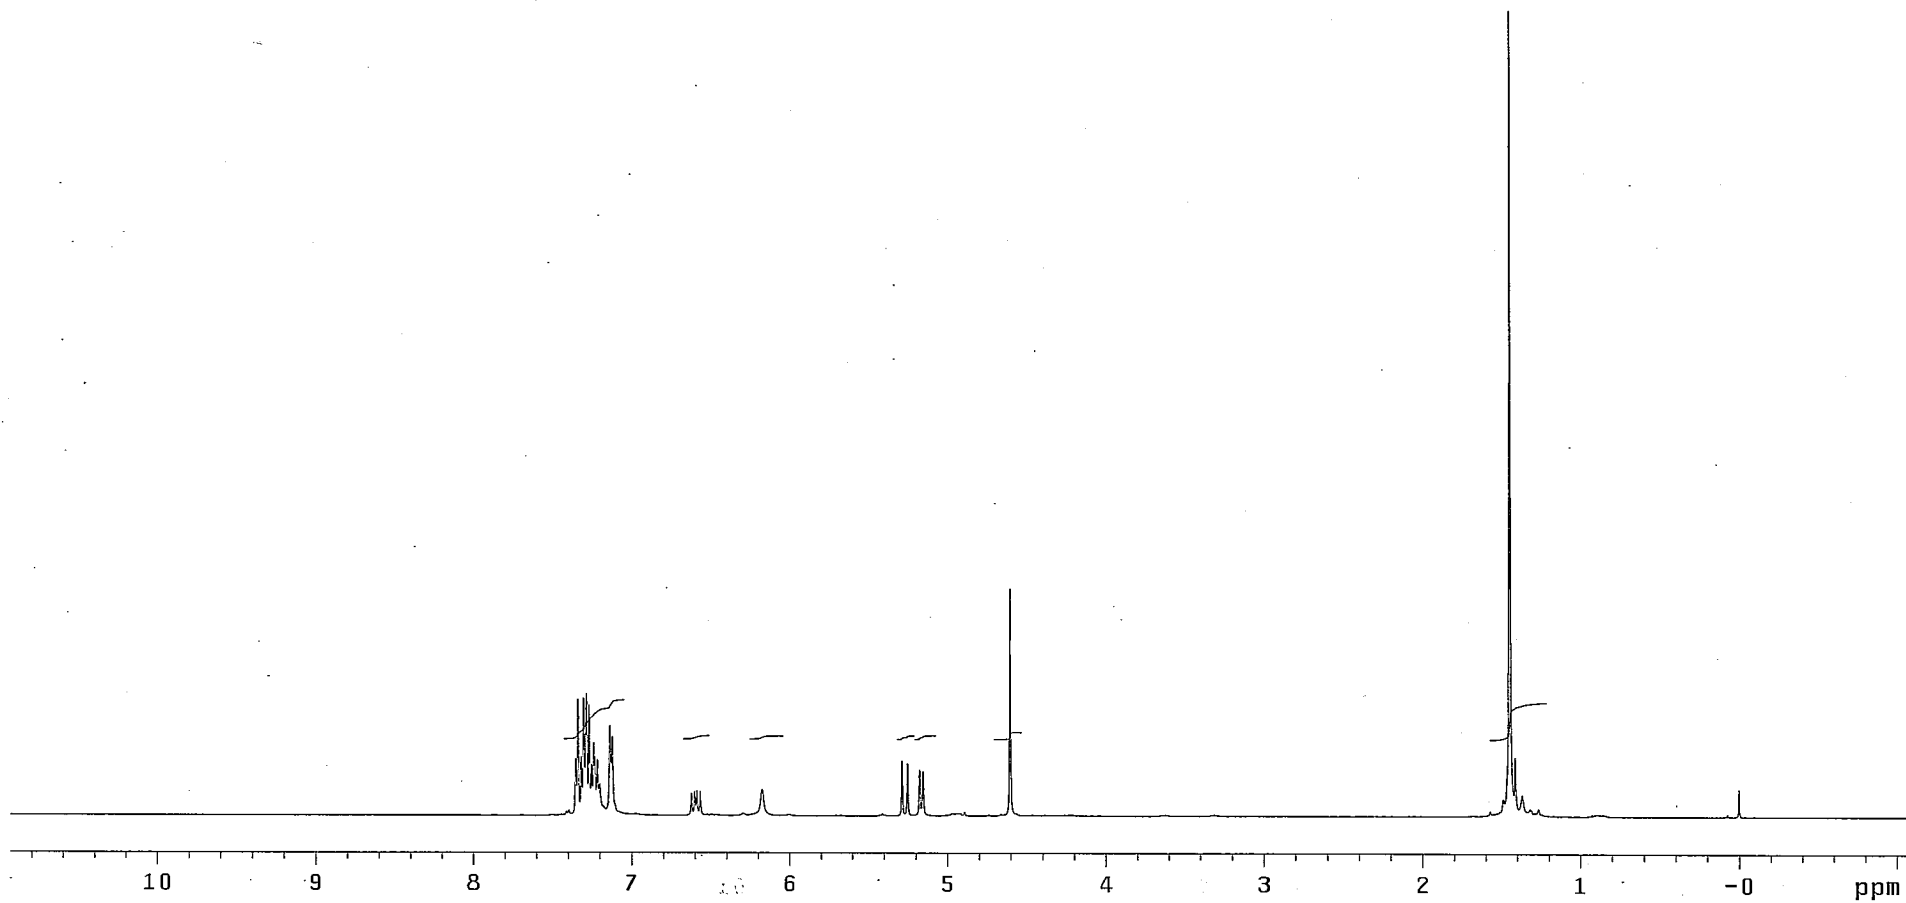

S120

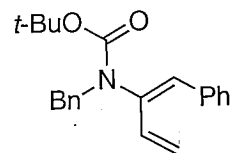

12

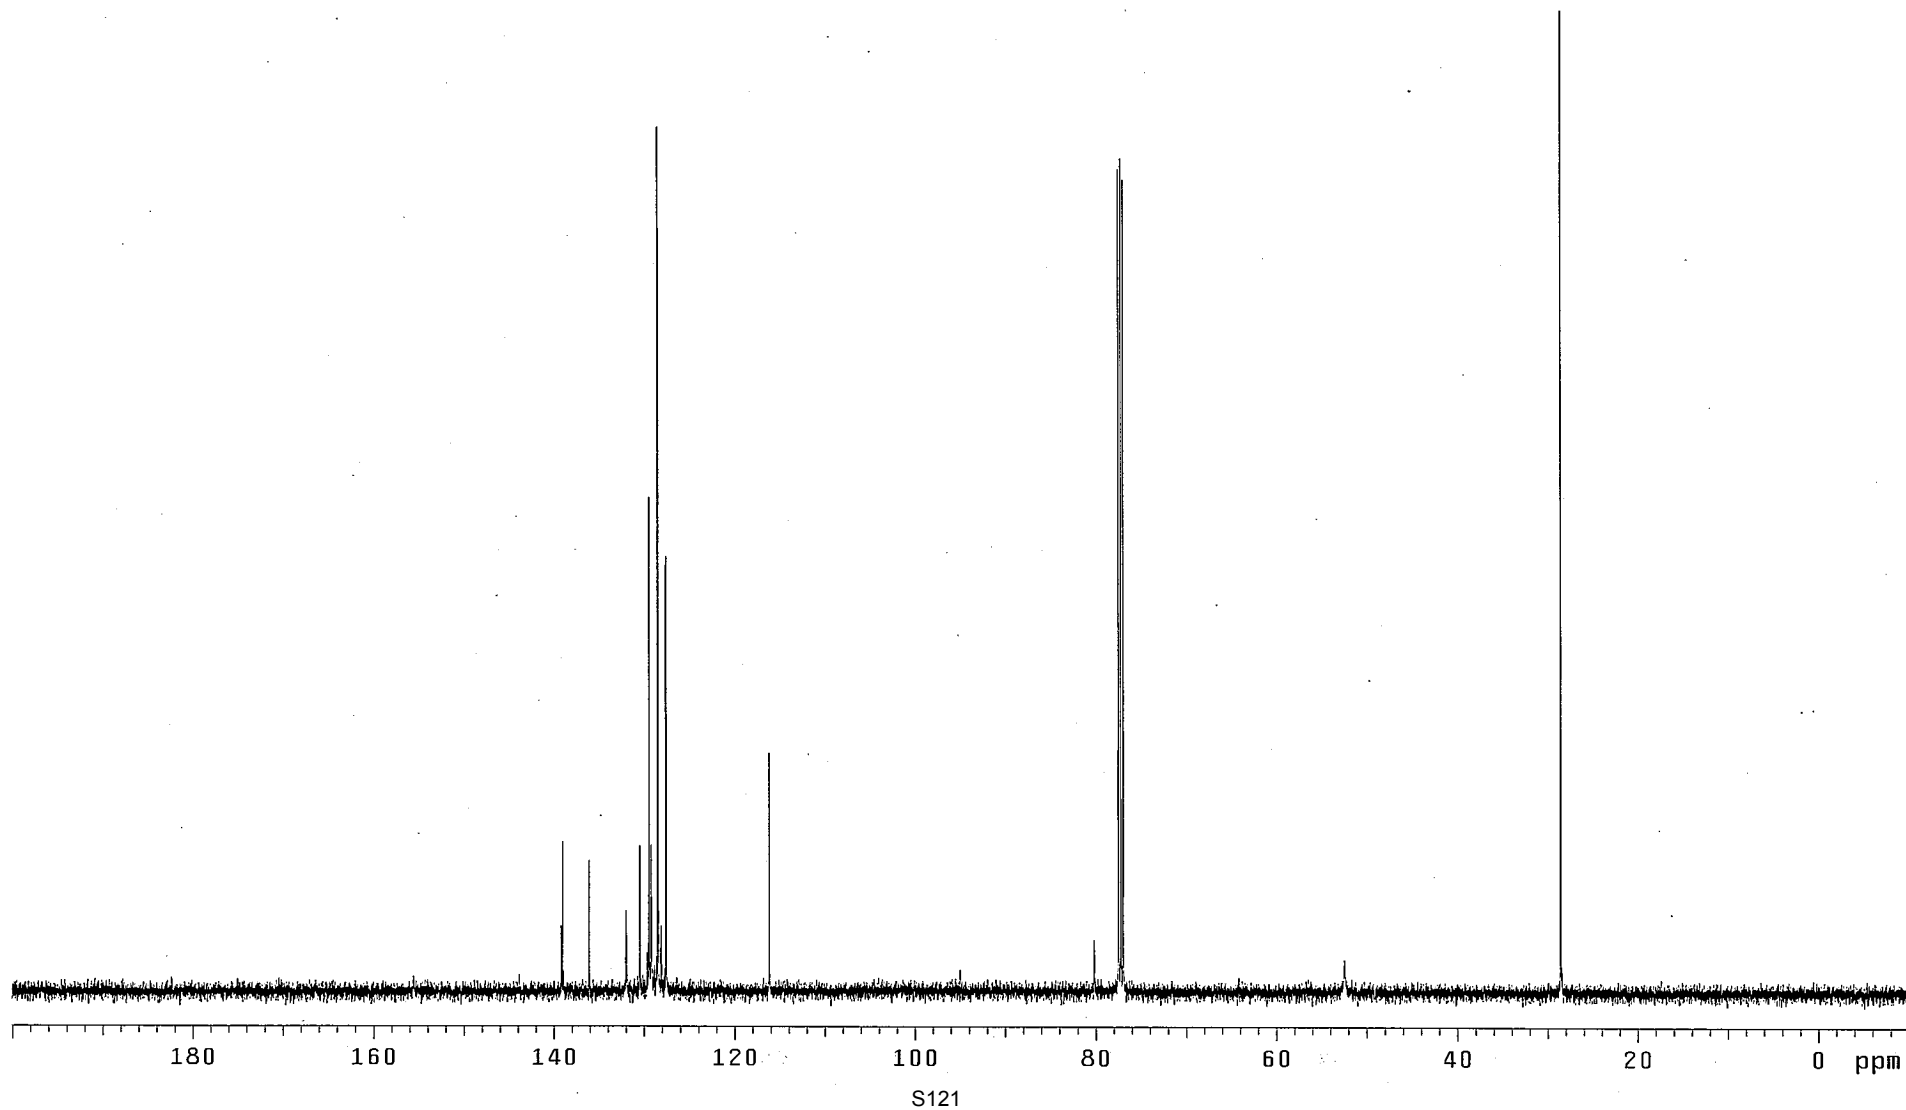

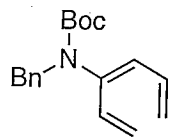

14

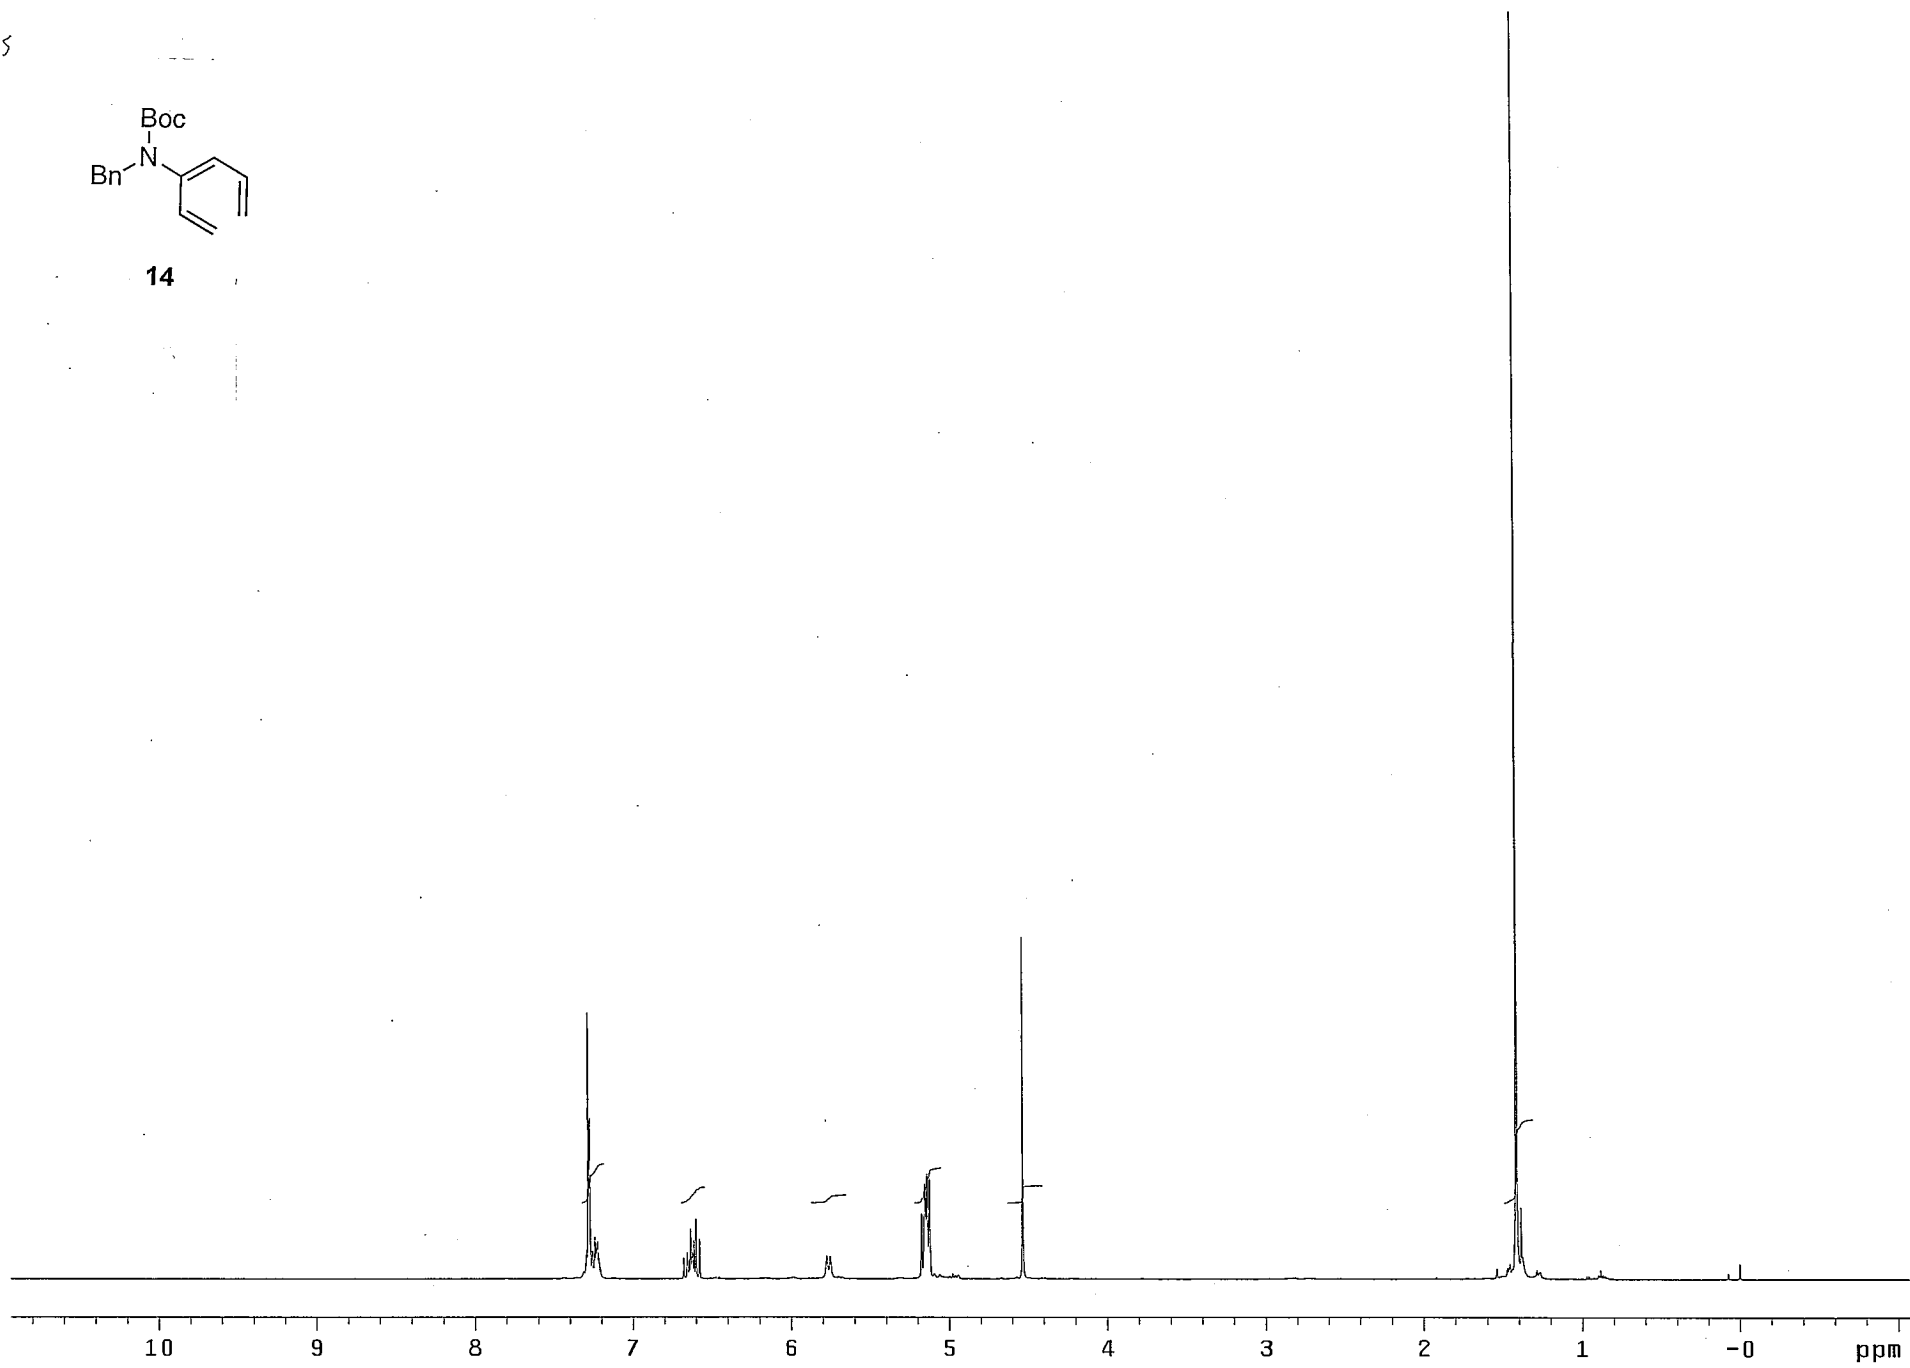

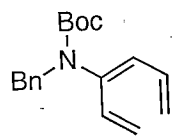

14

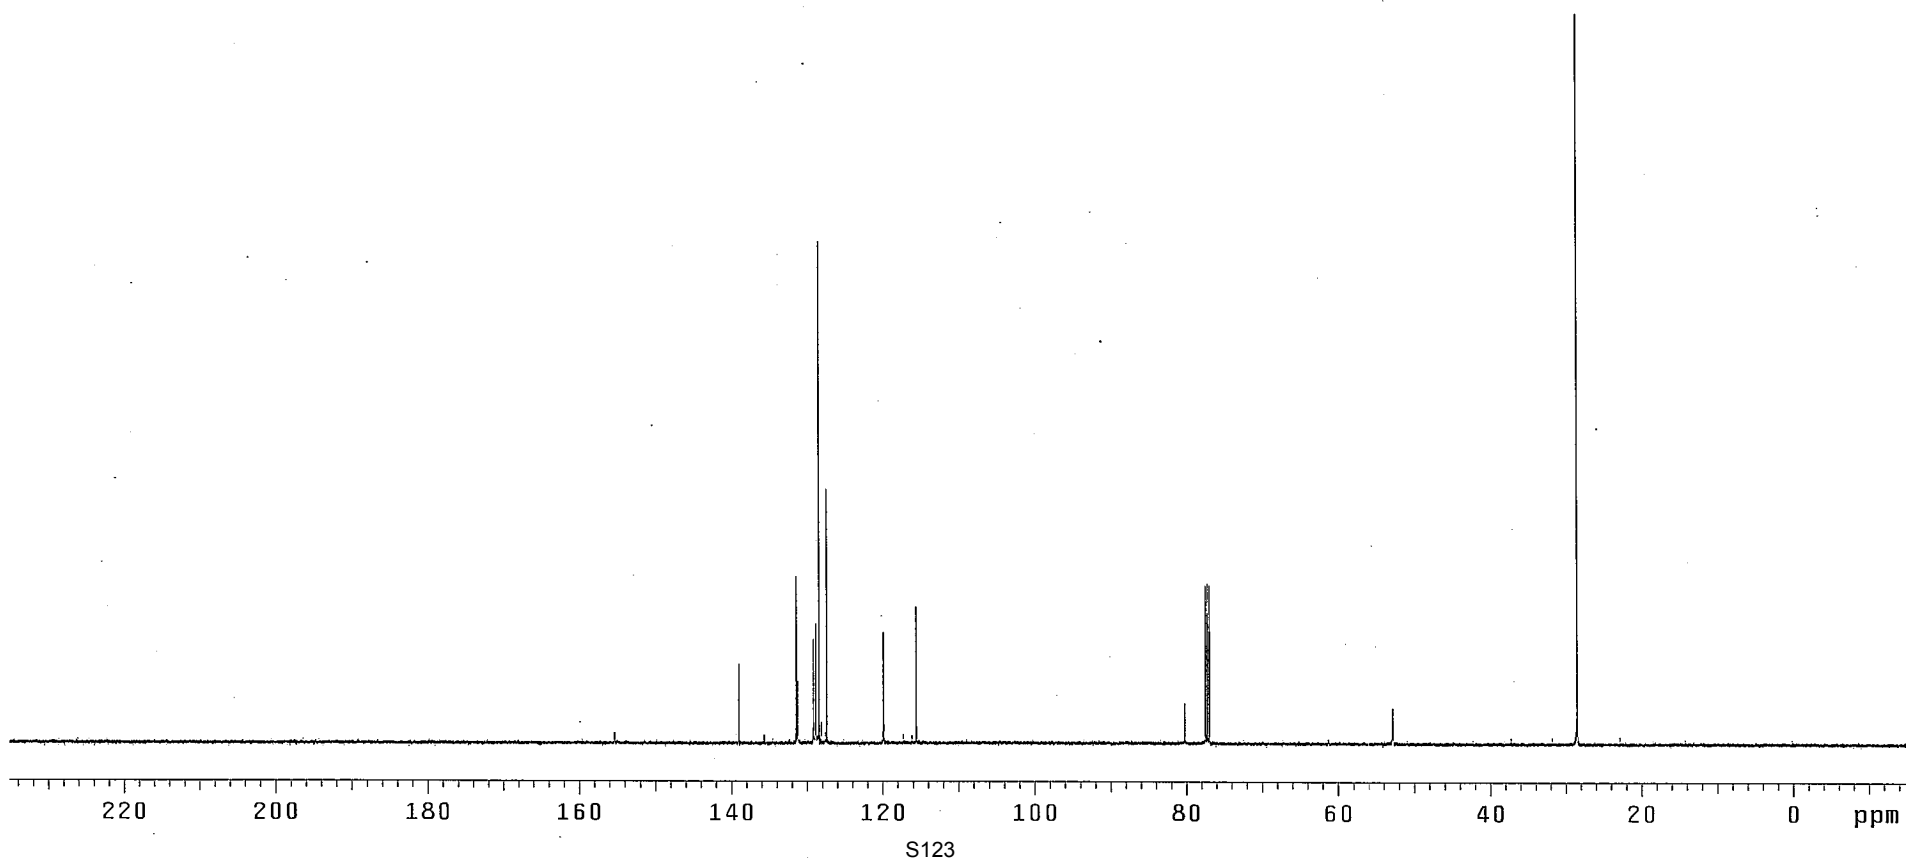

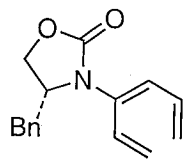

22

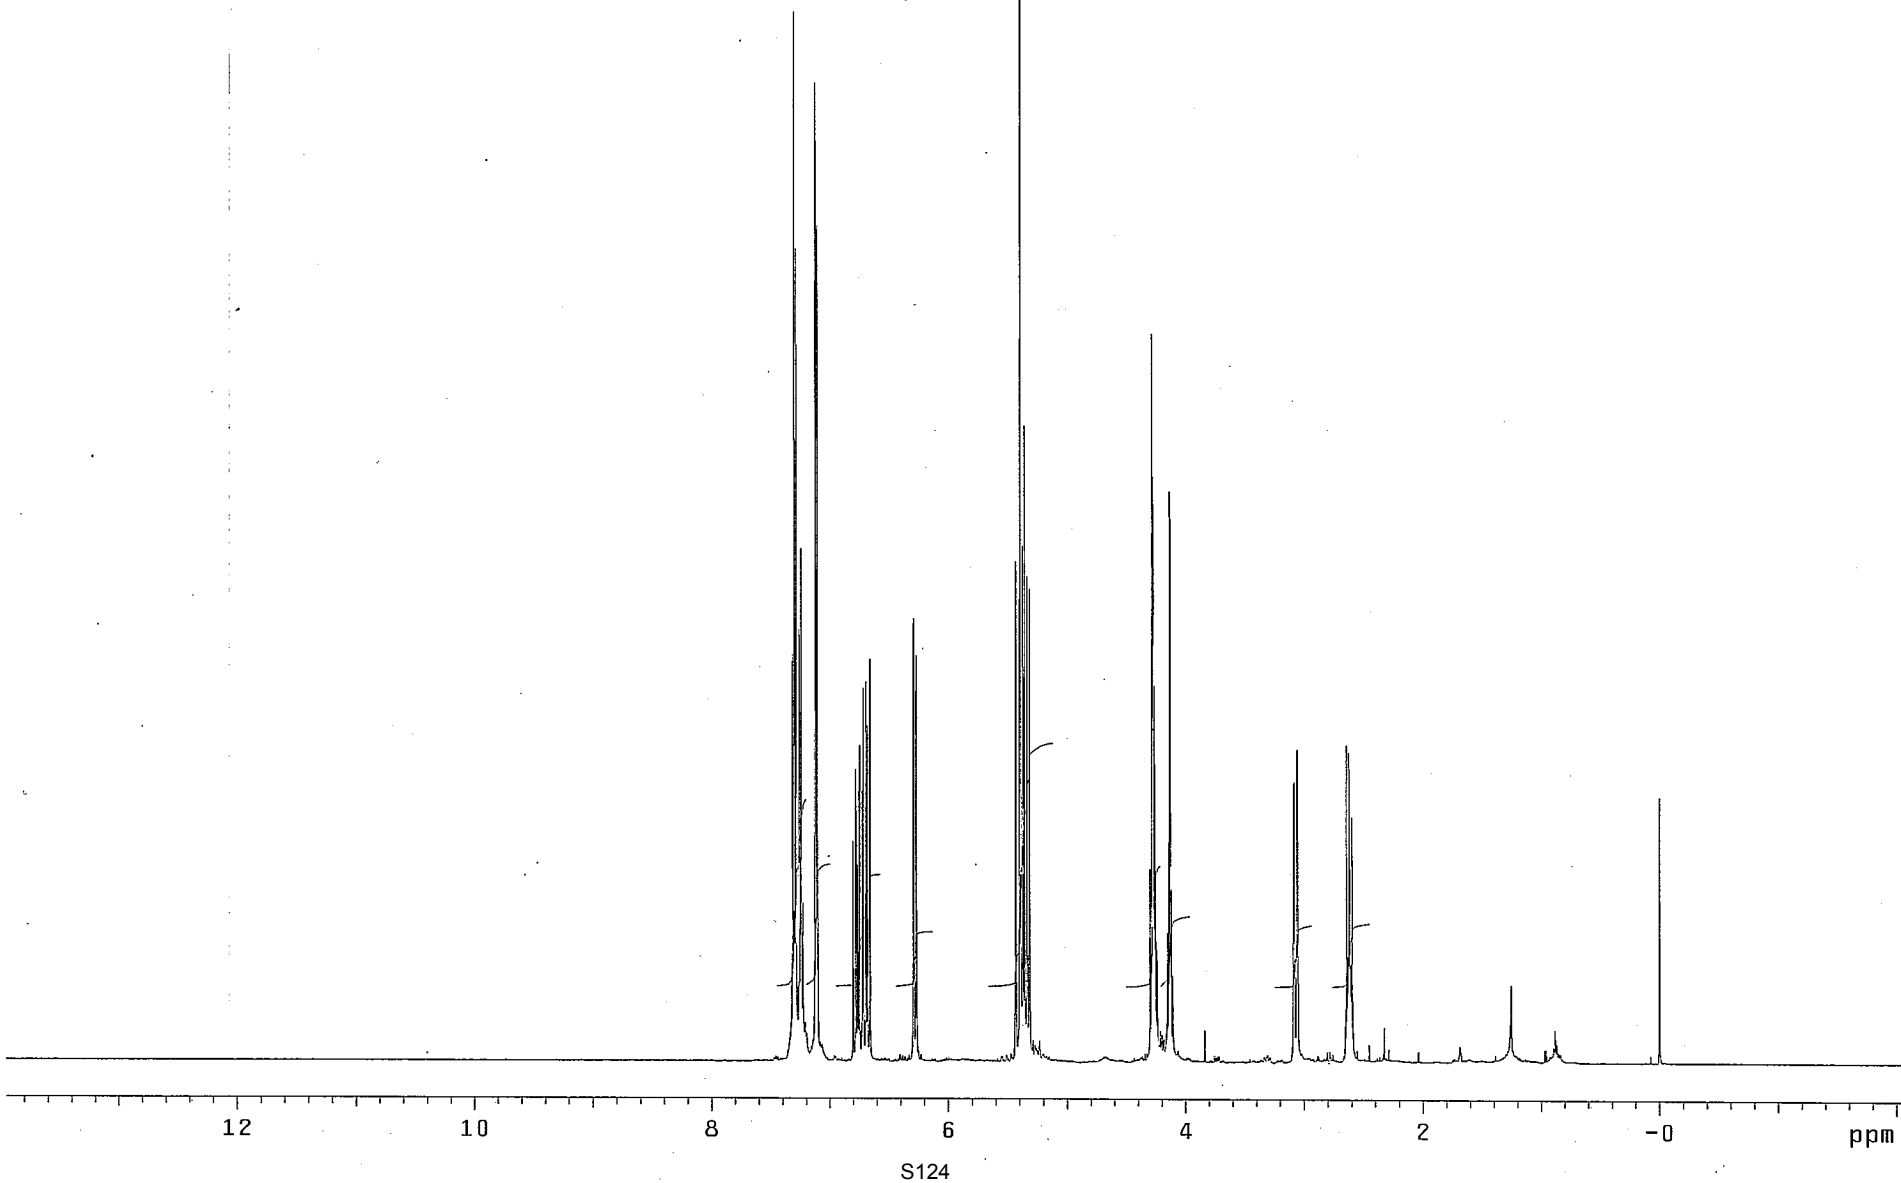

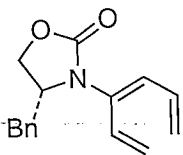

22

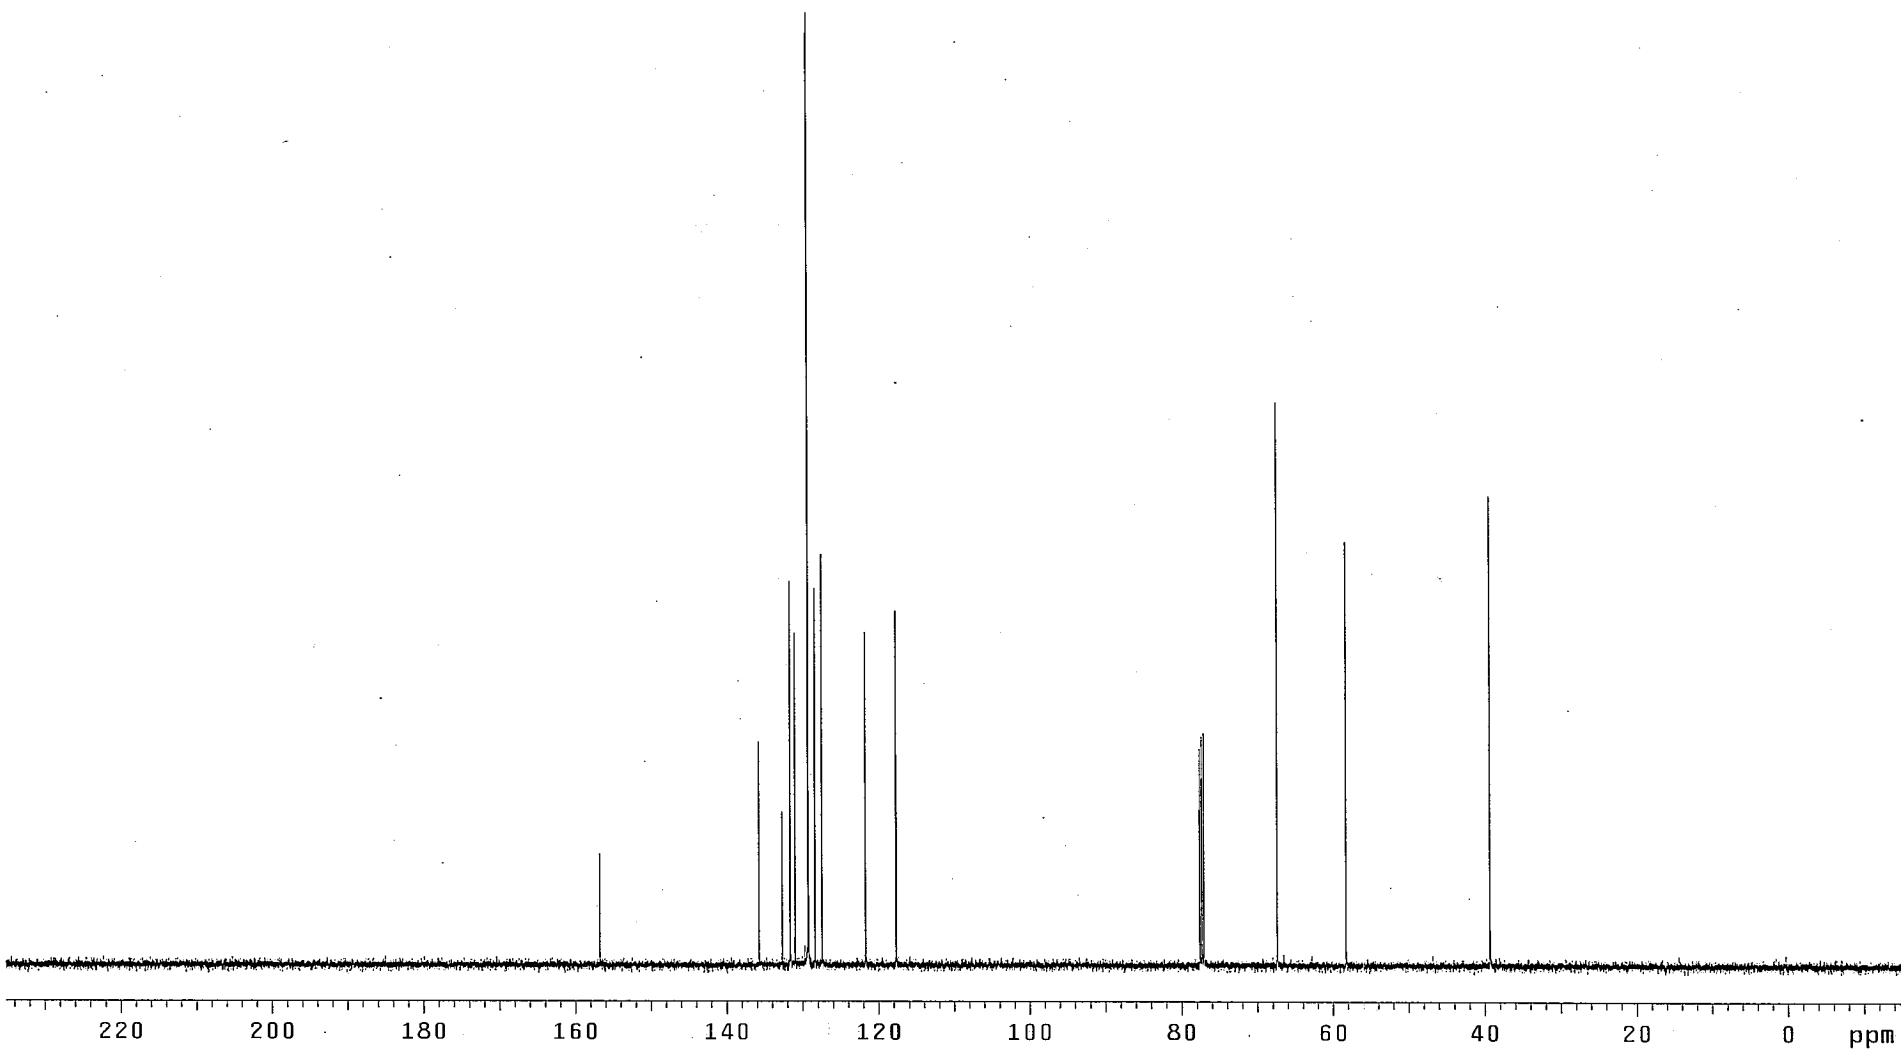

S125



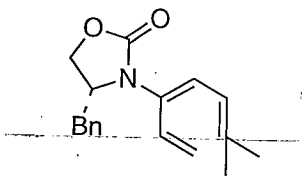

23a

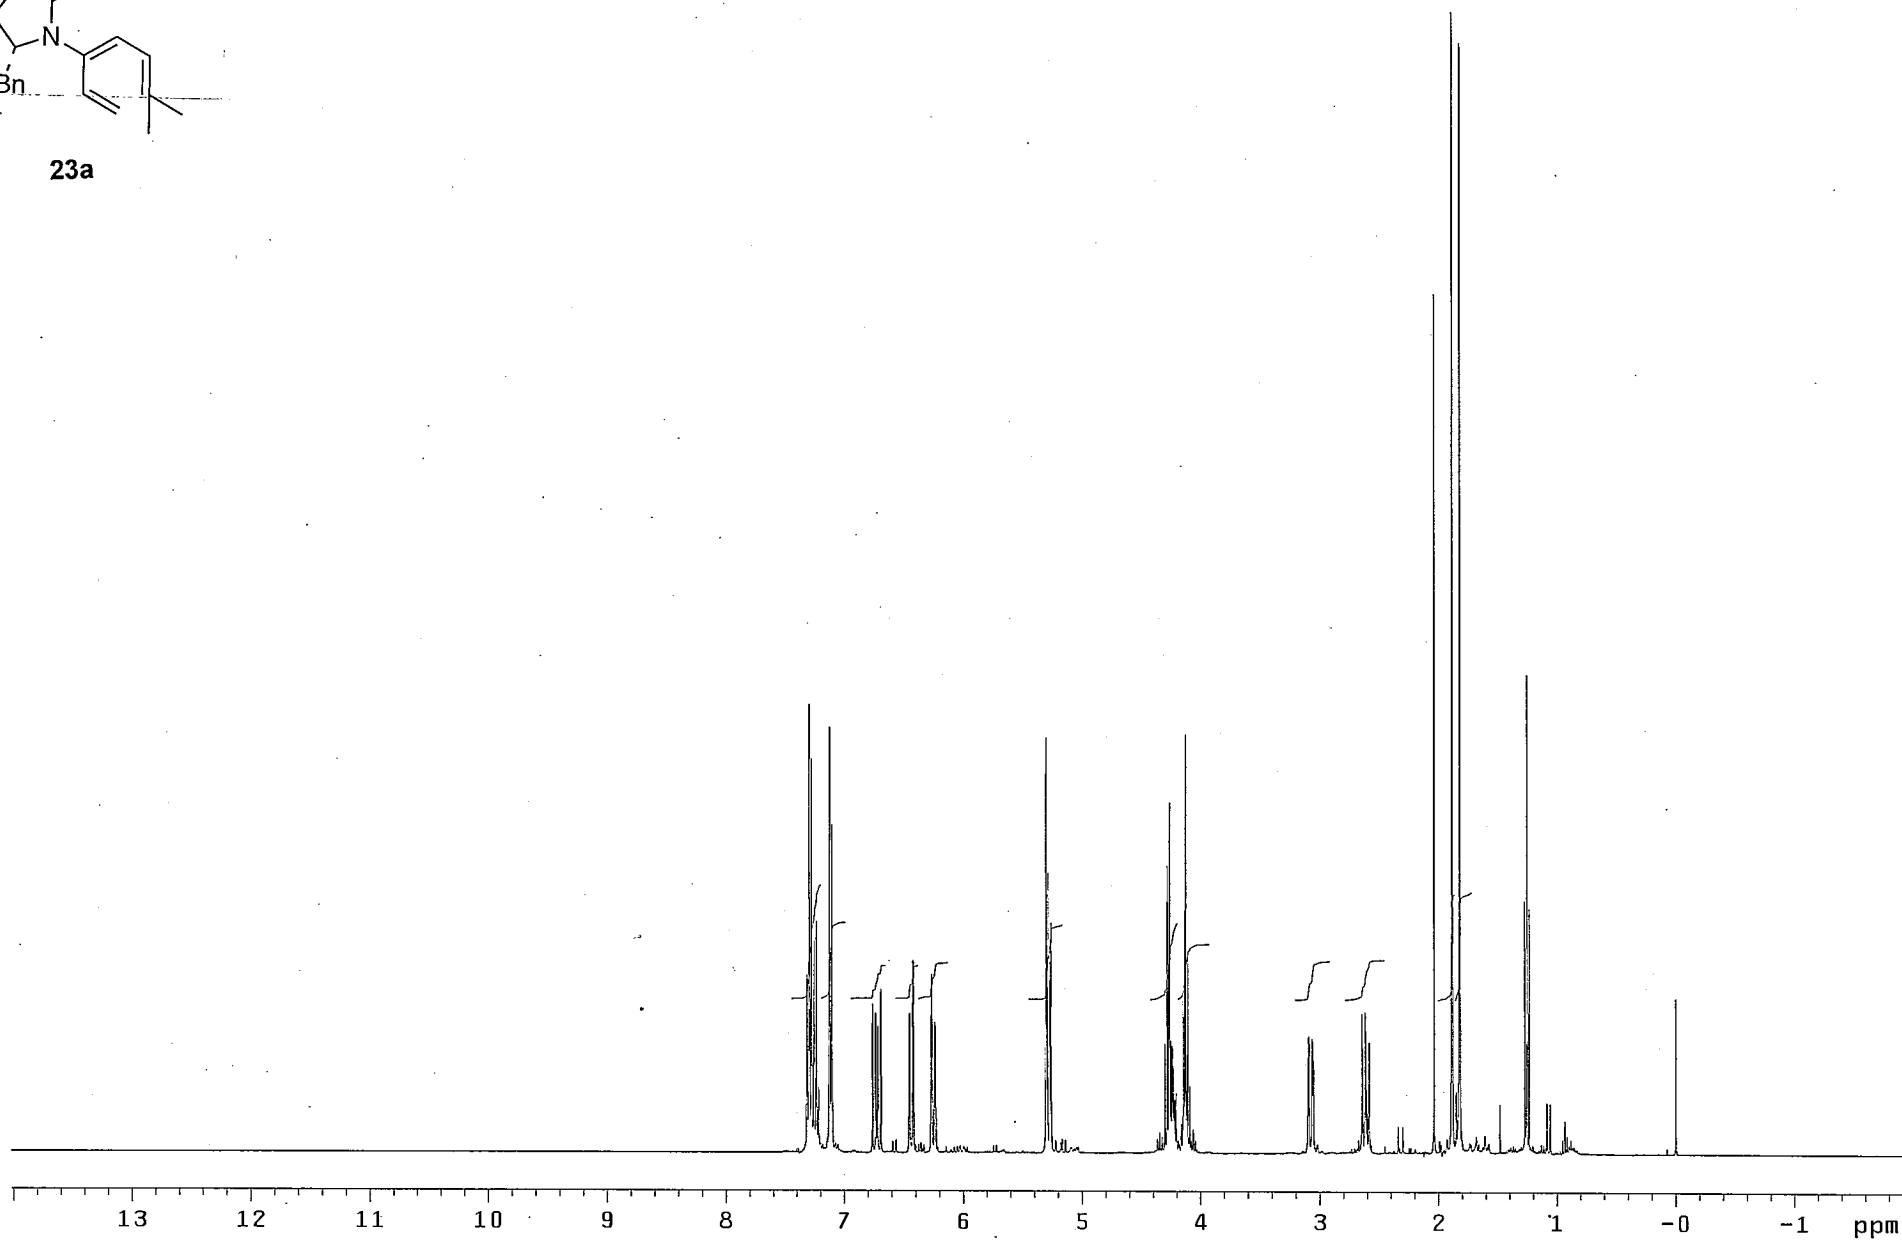

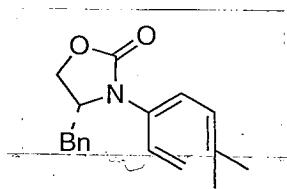

23a

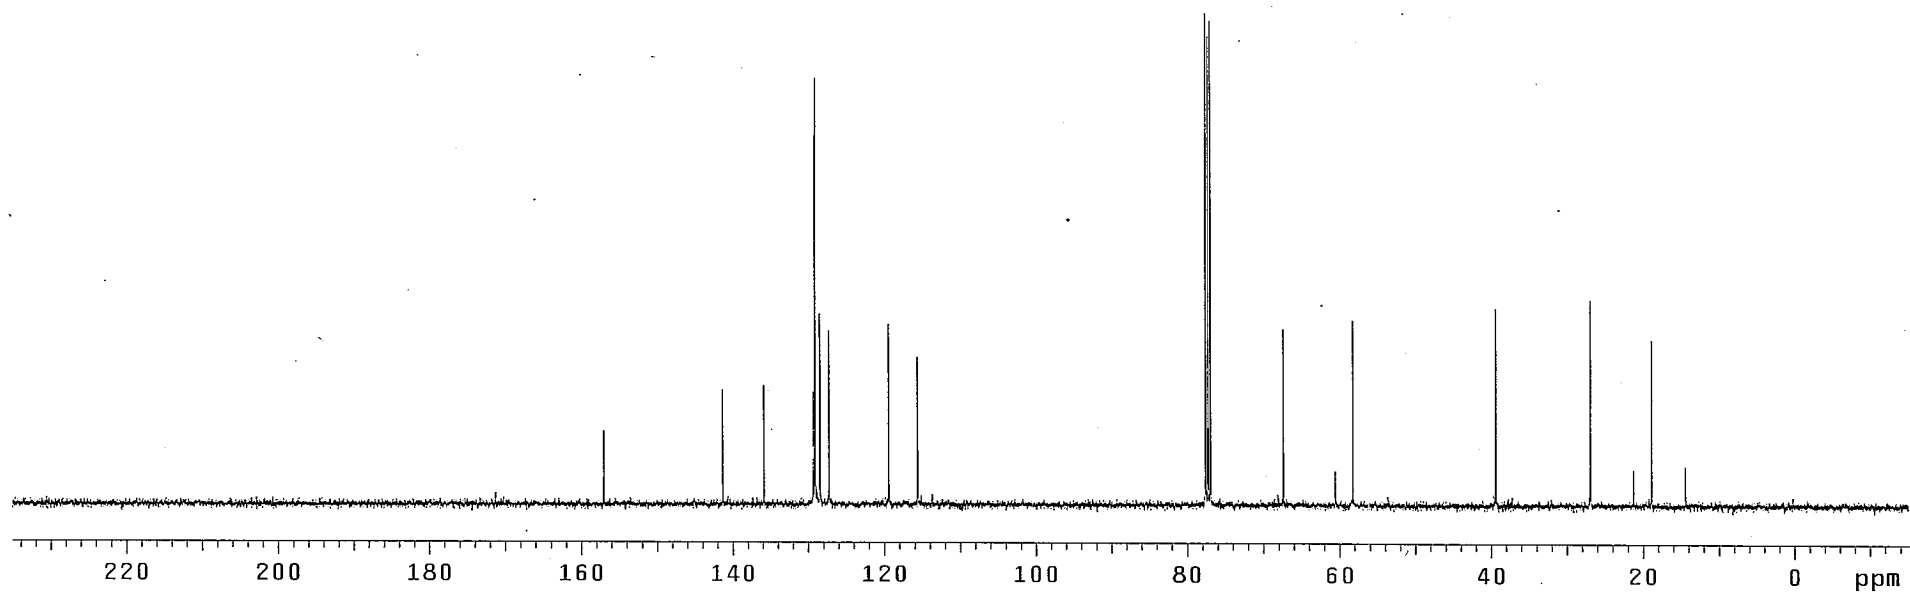

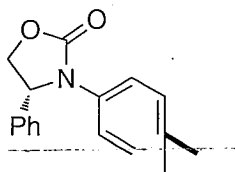

23b

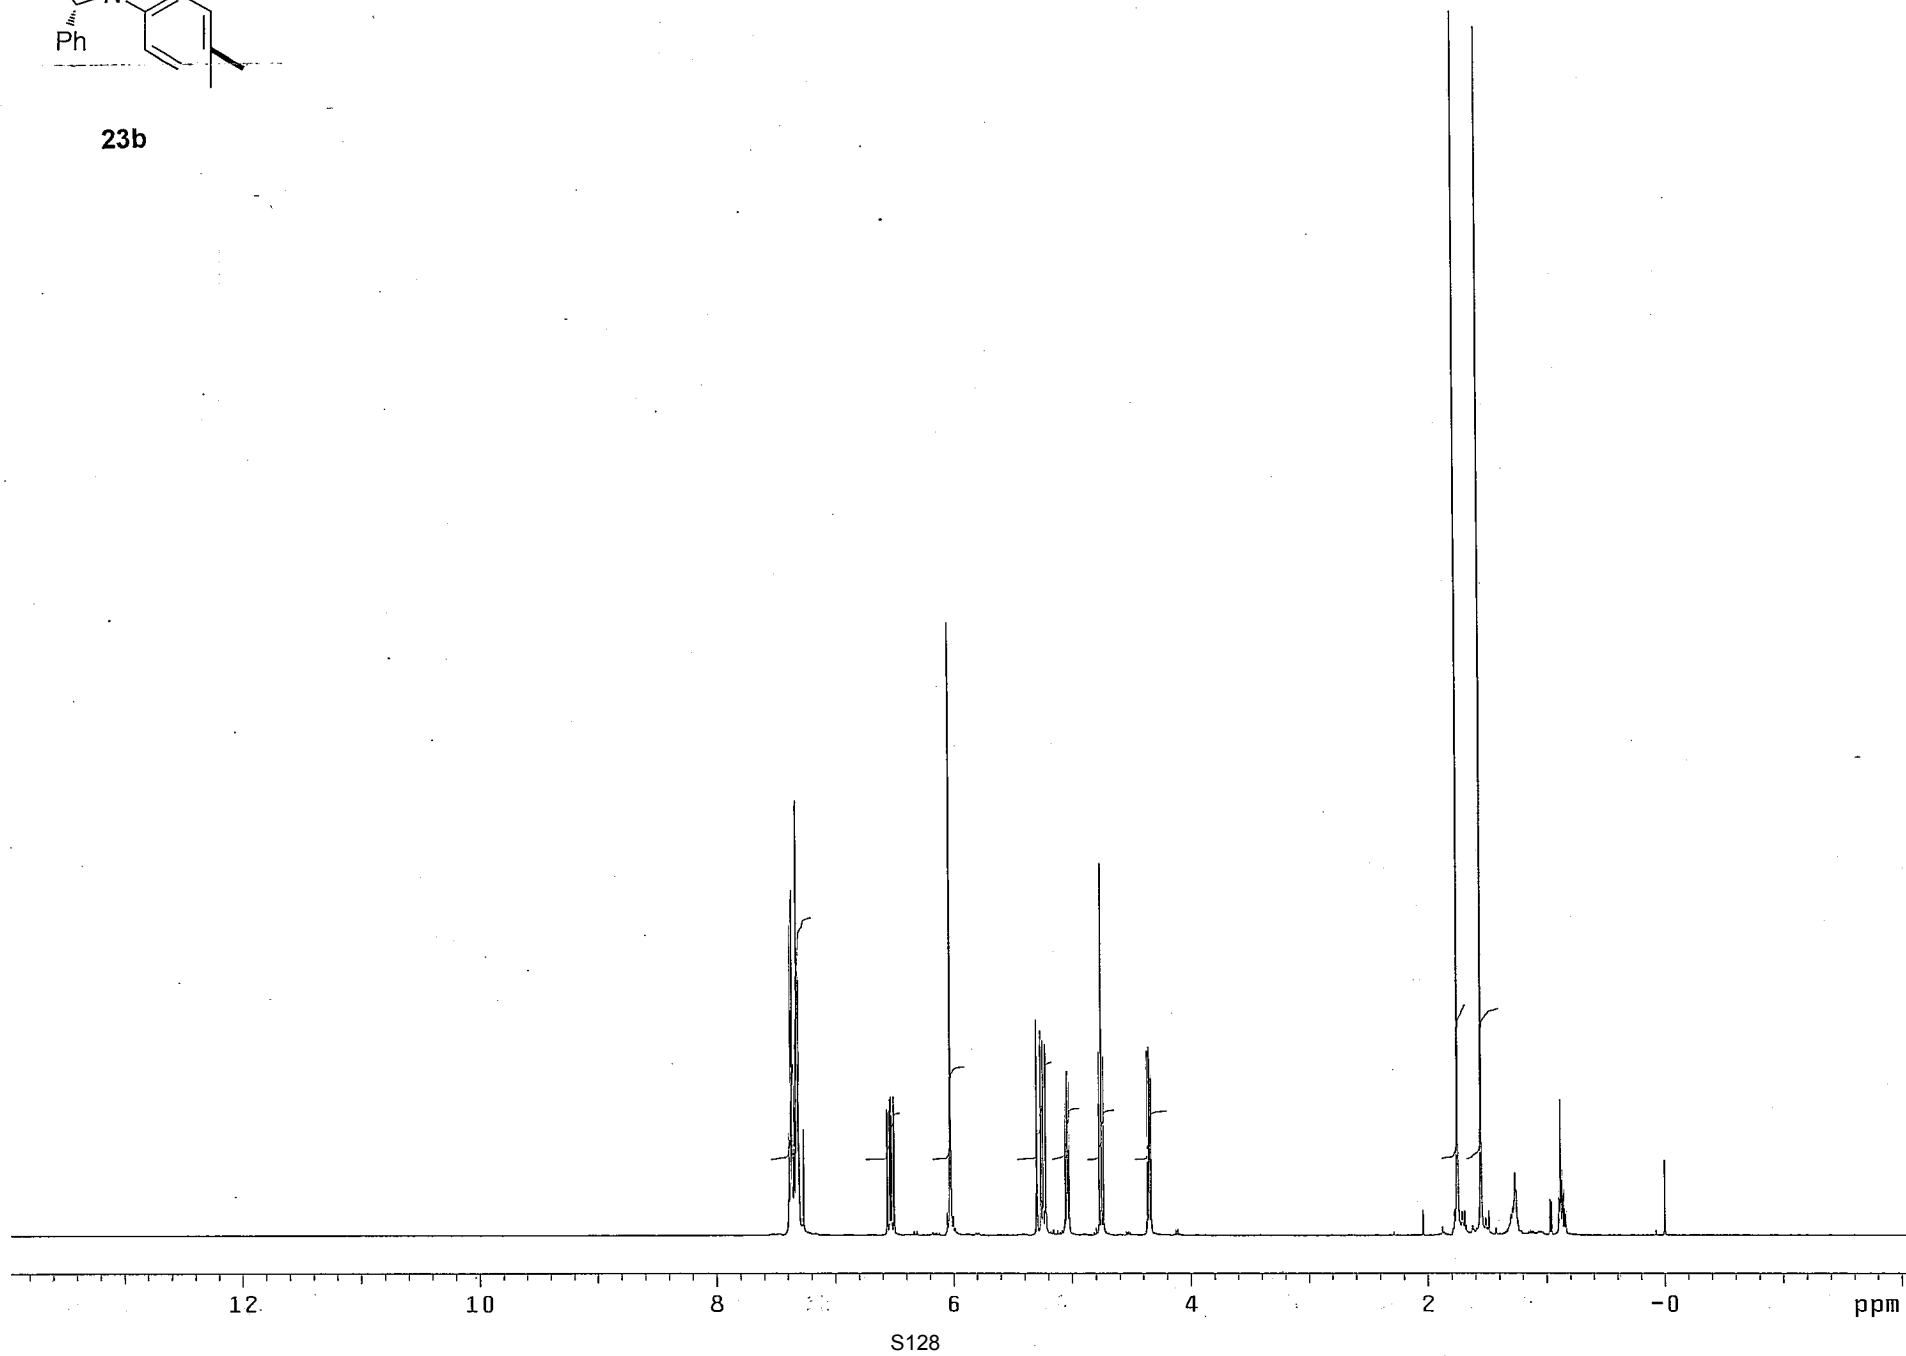

S128

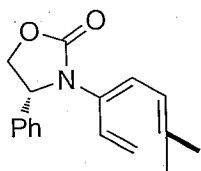

23b

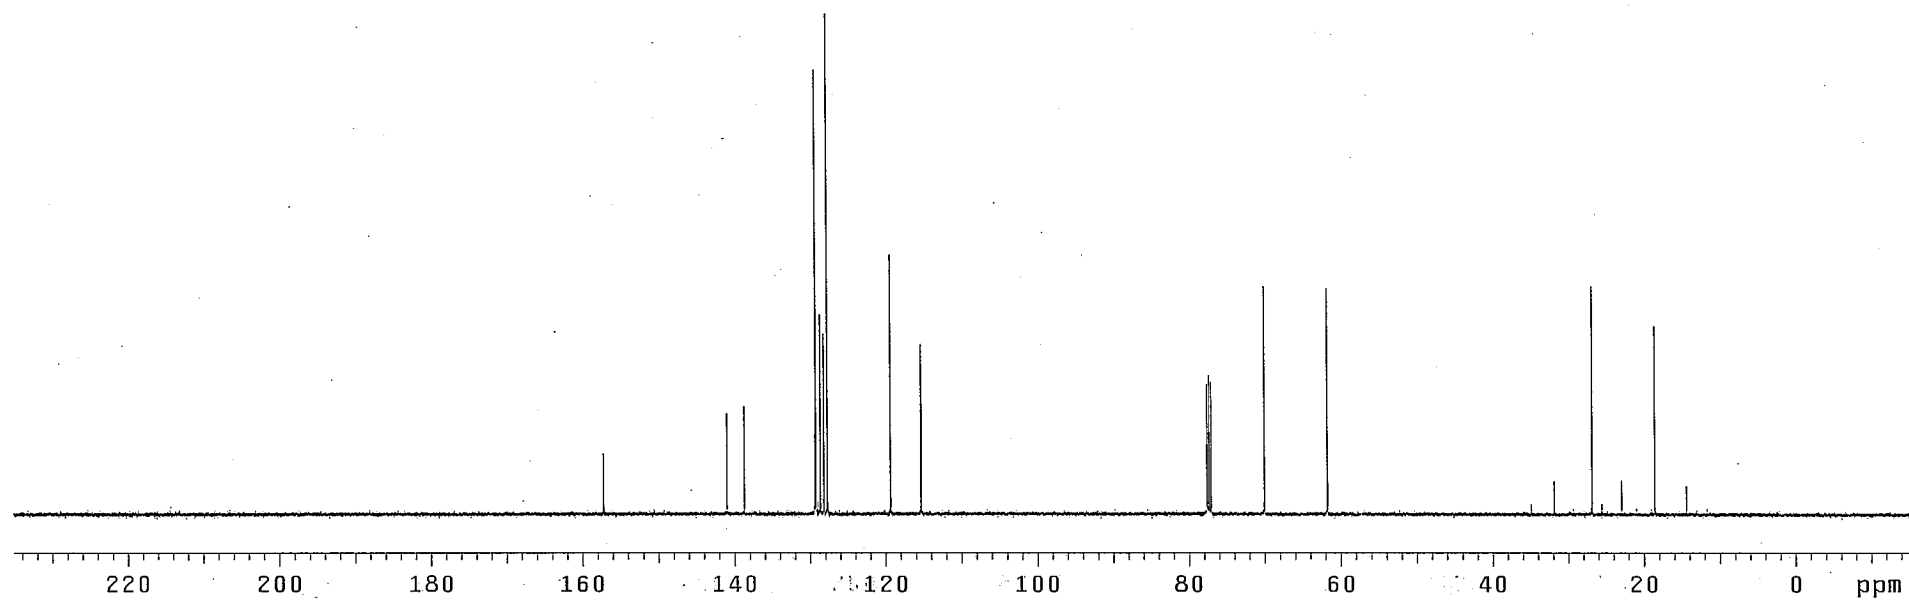

S129

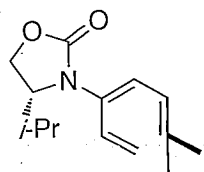

23c

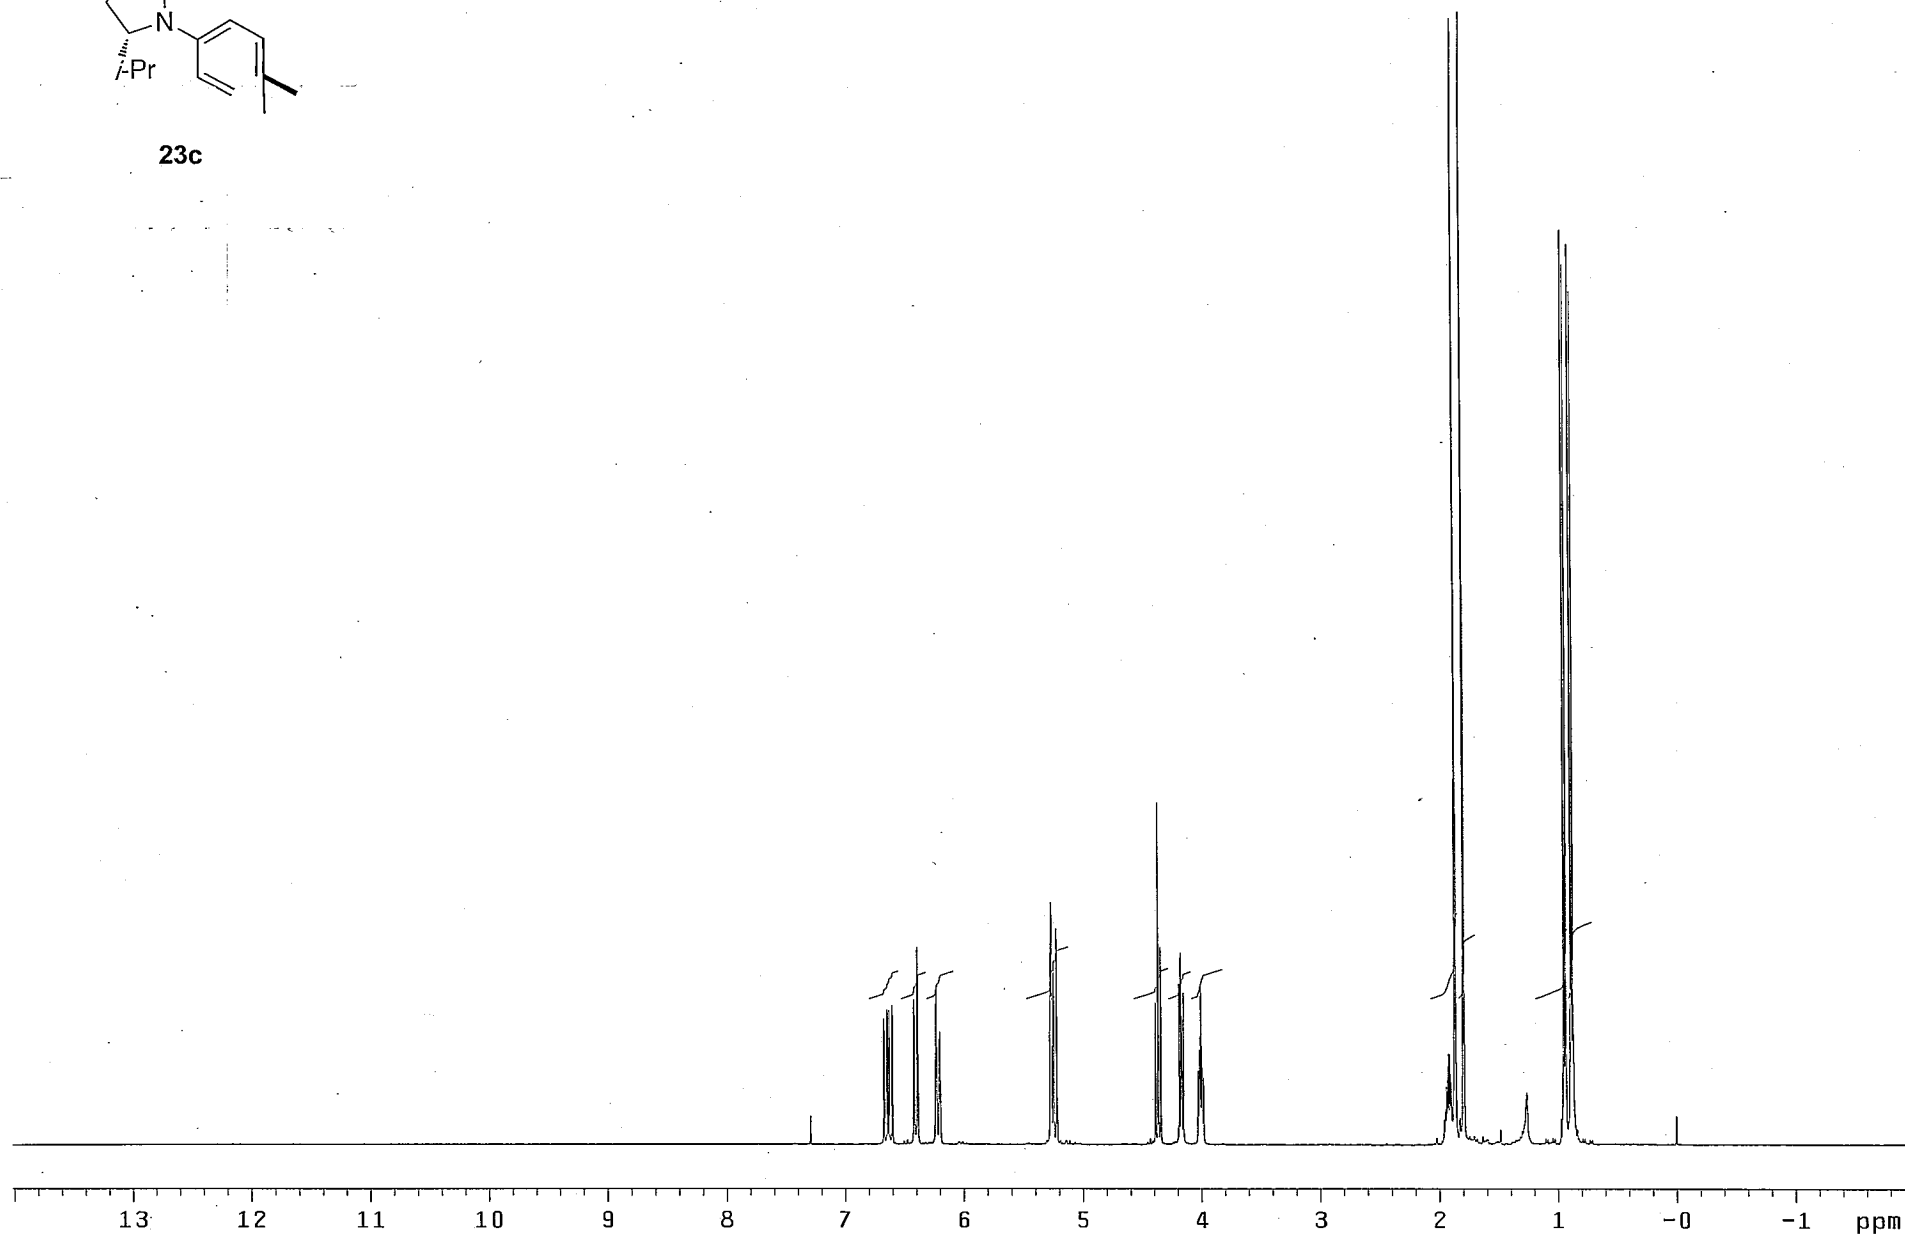

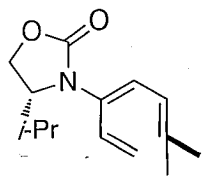

23c

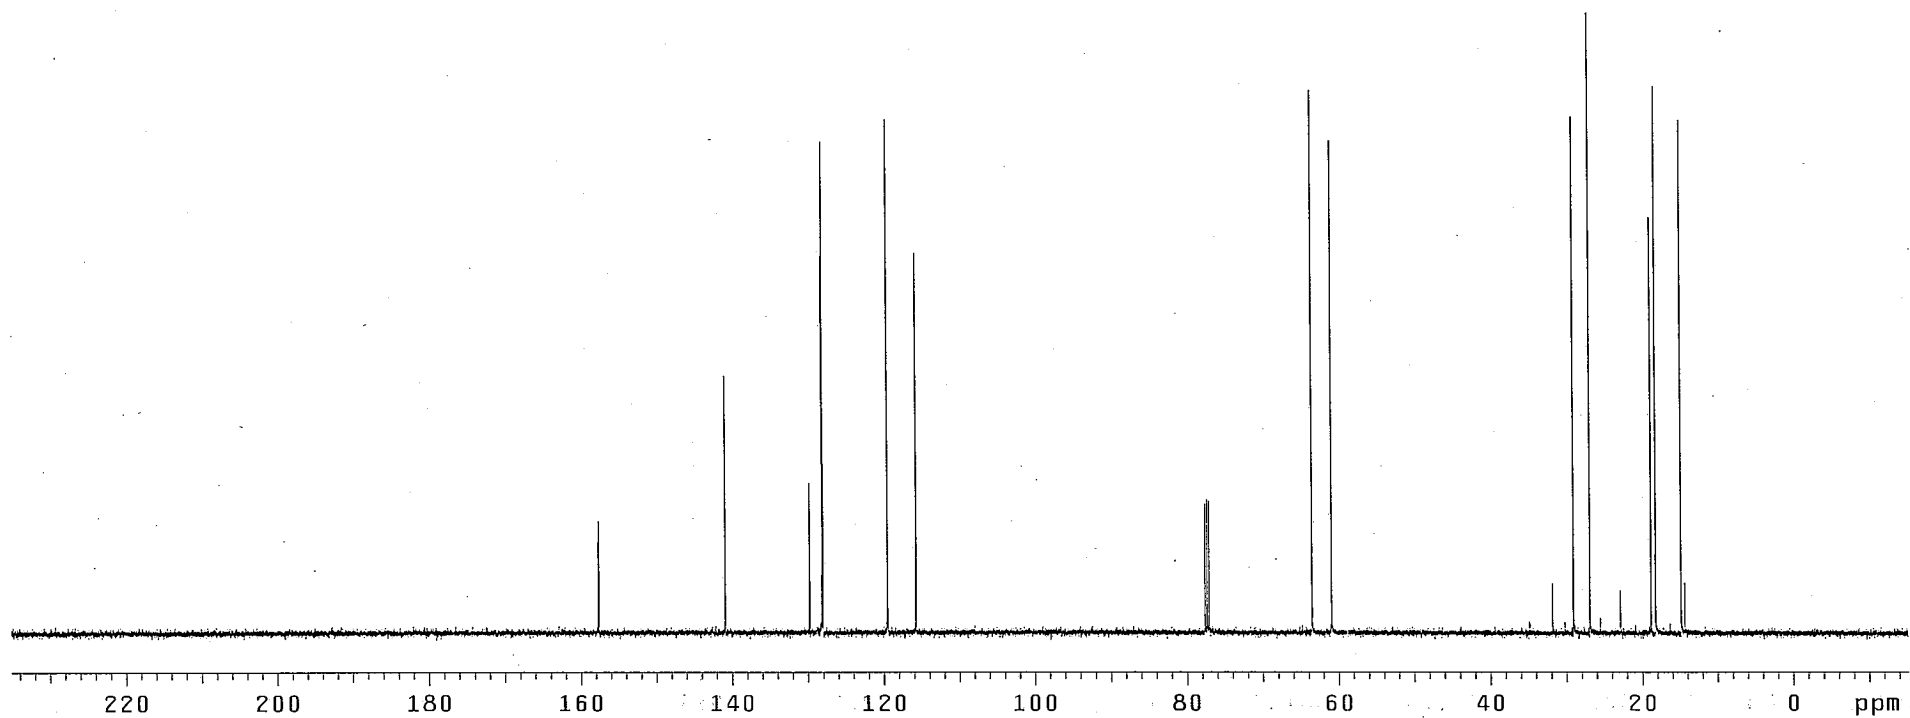

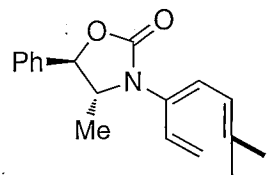

23d

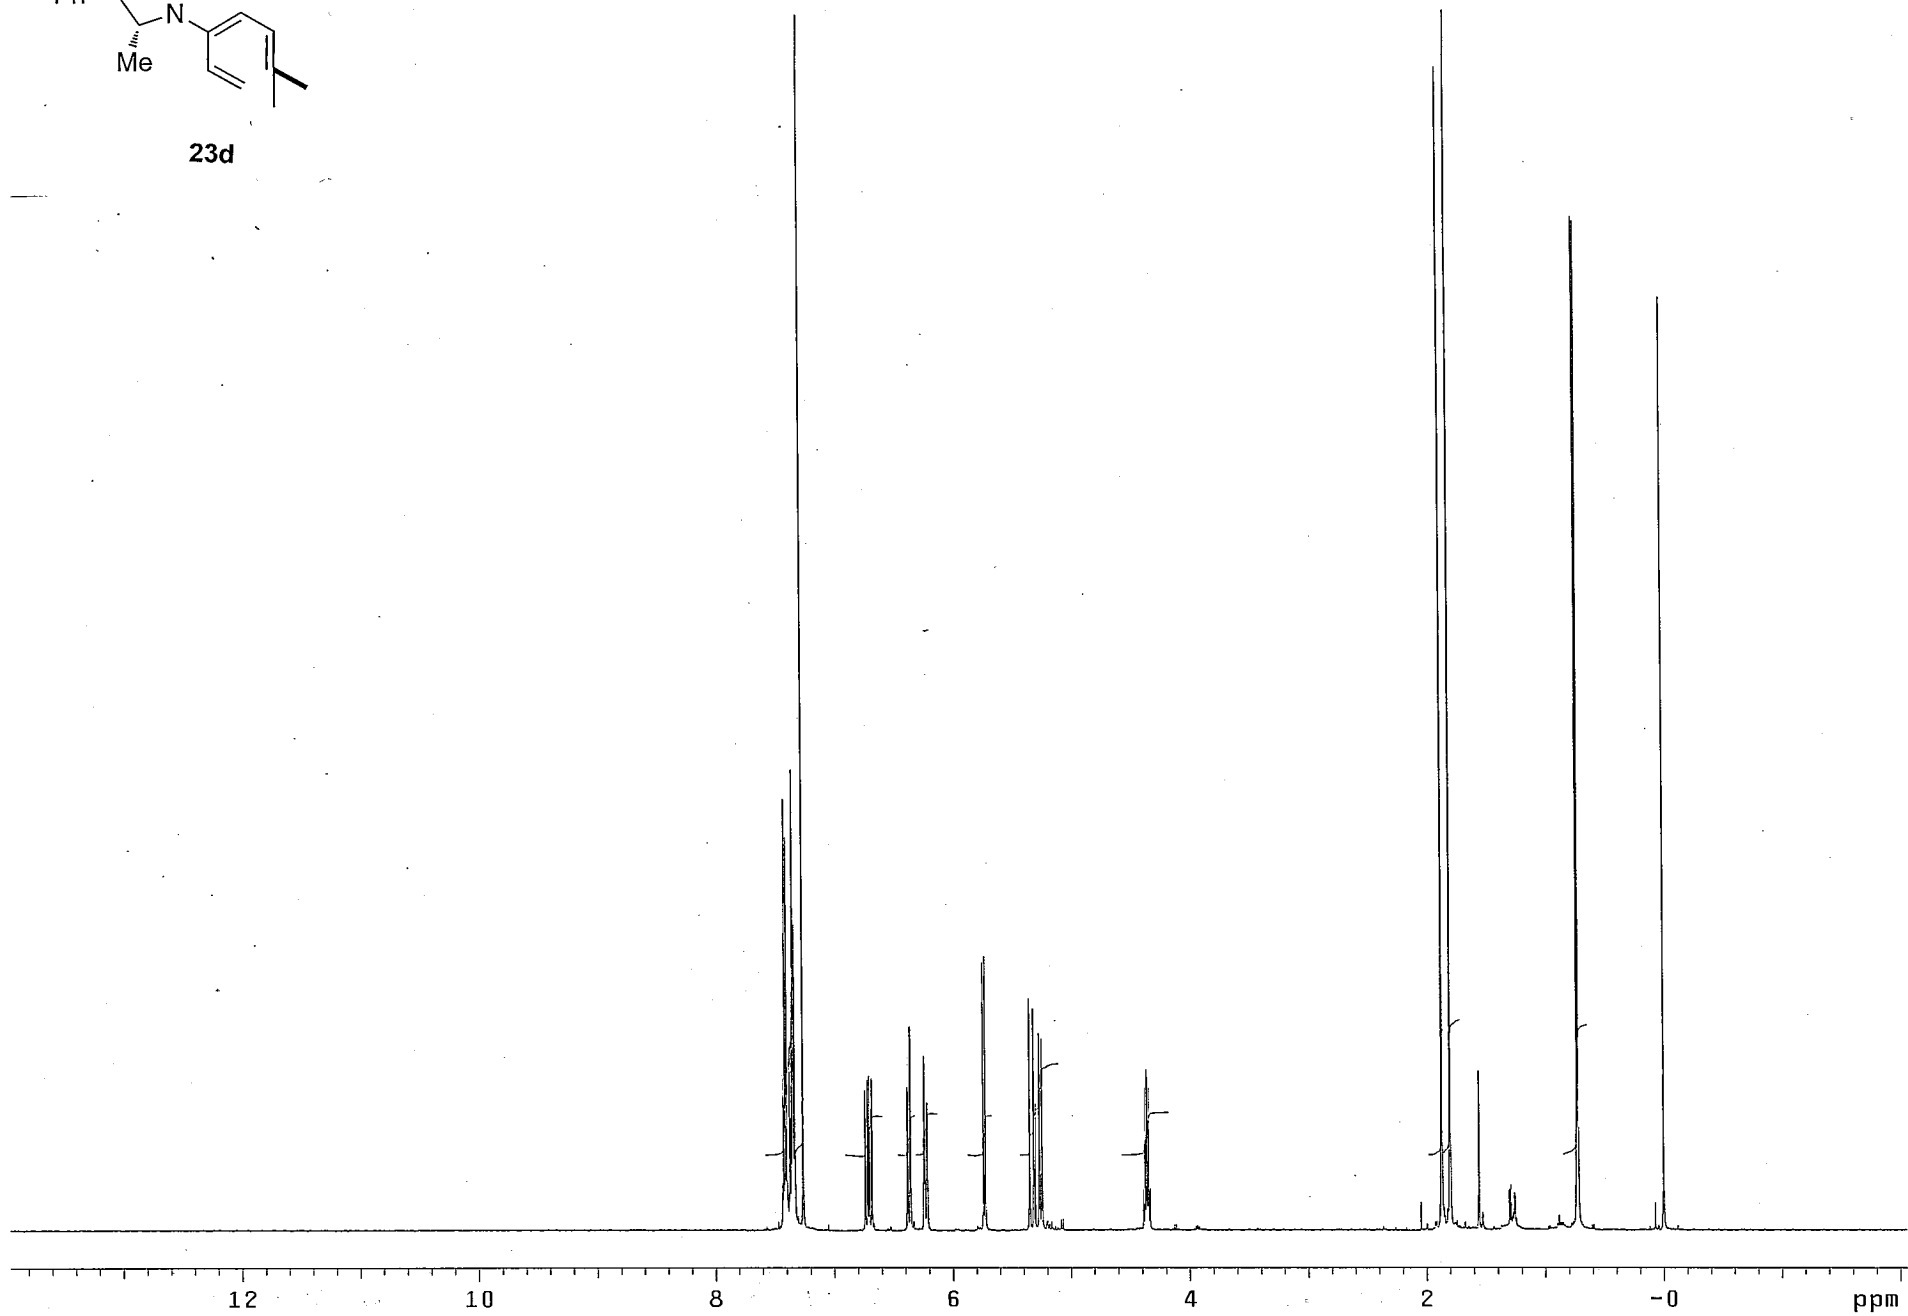

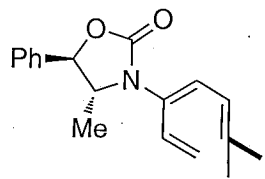

23d

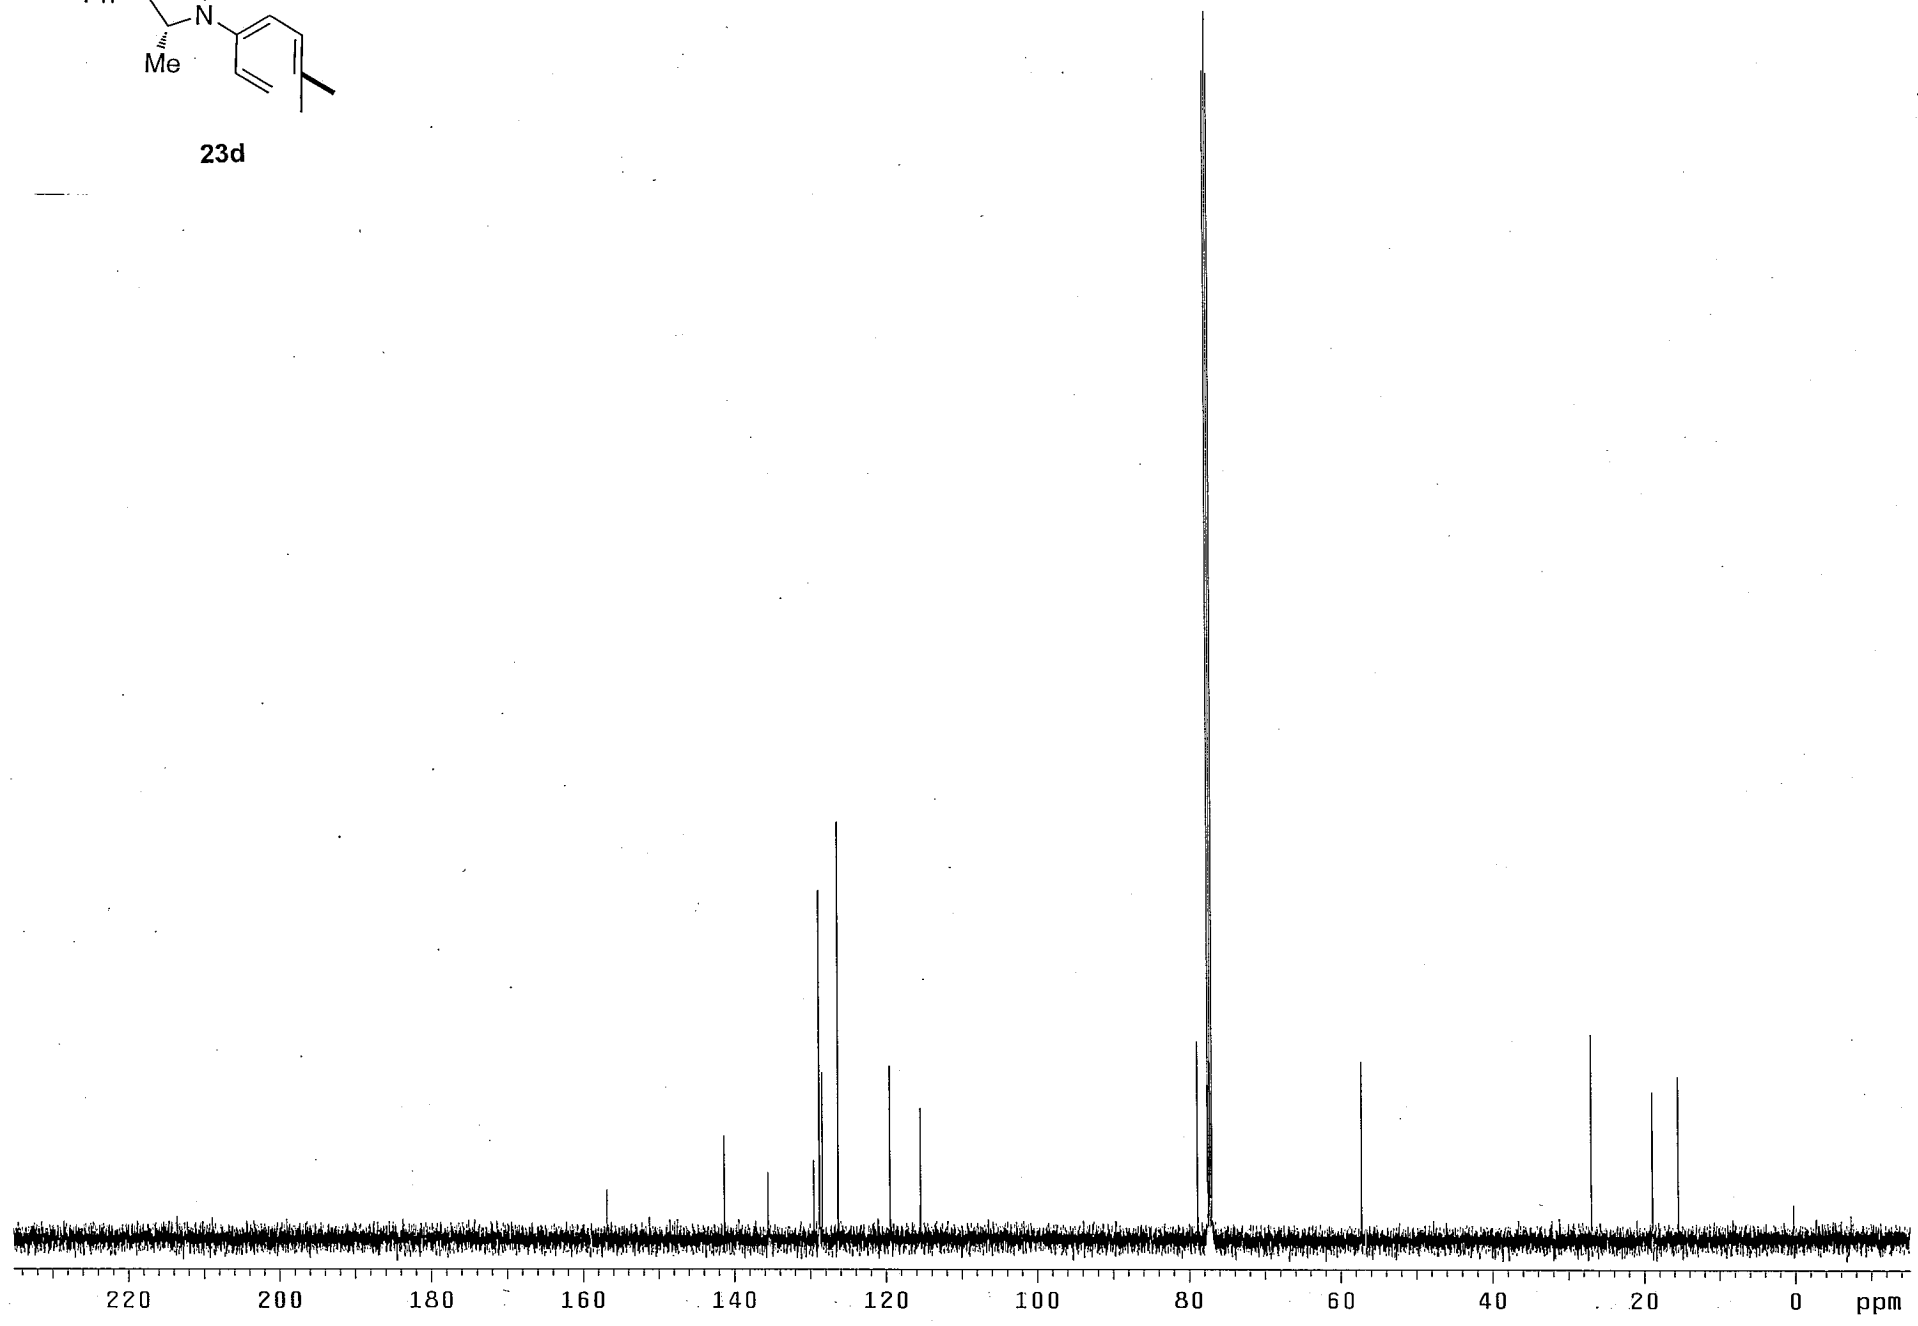



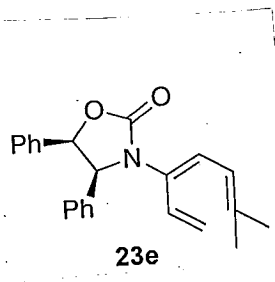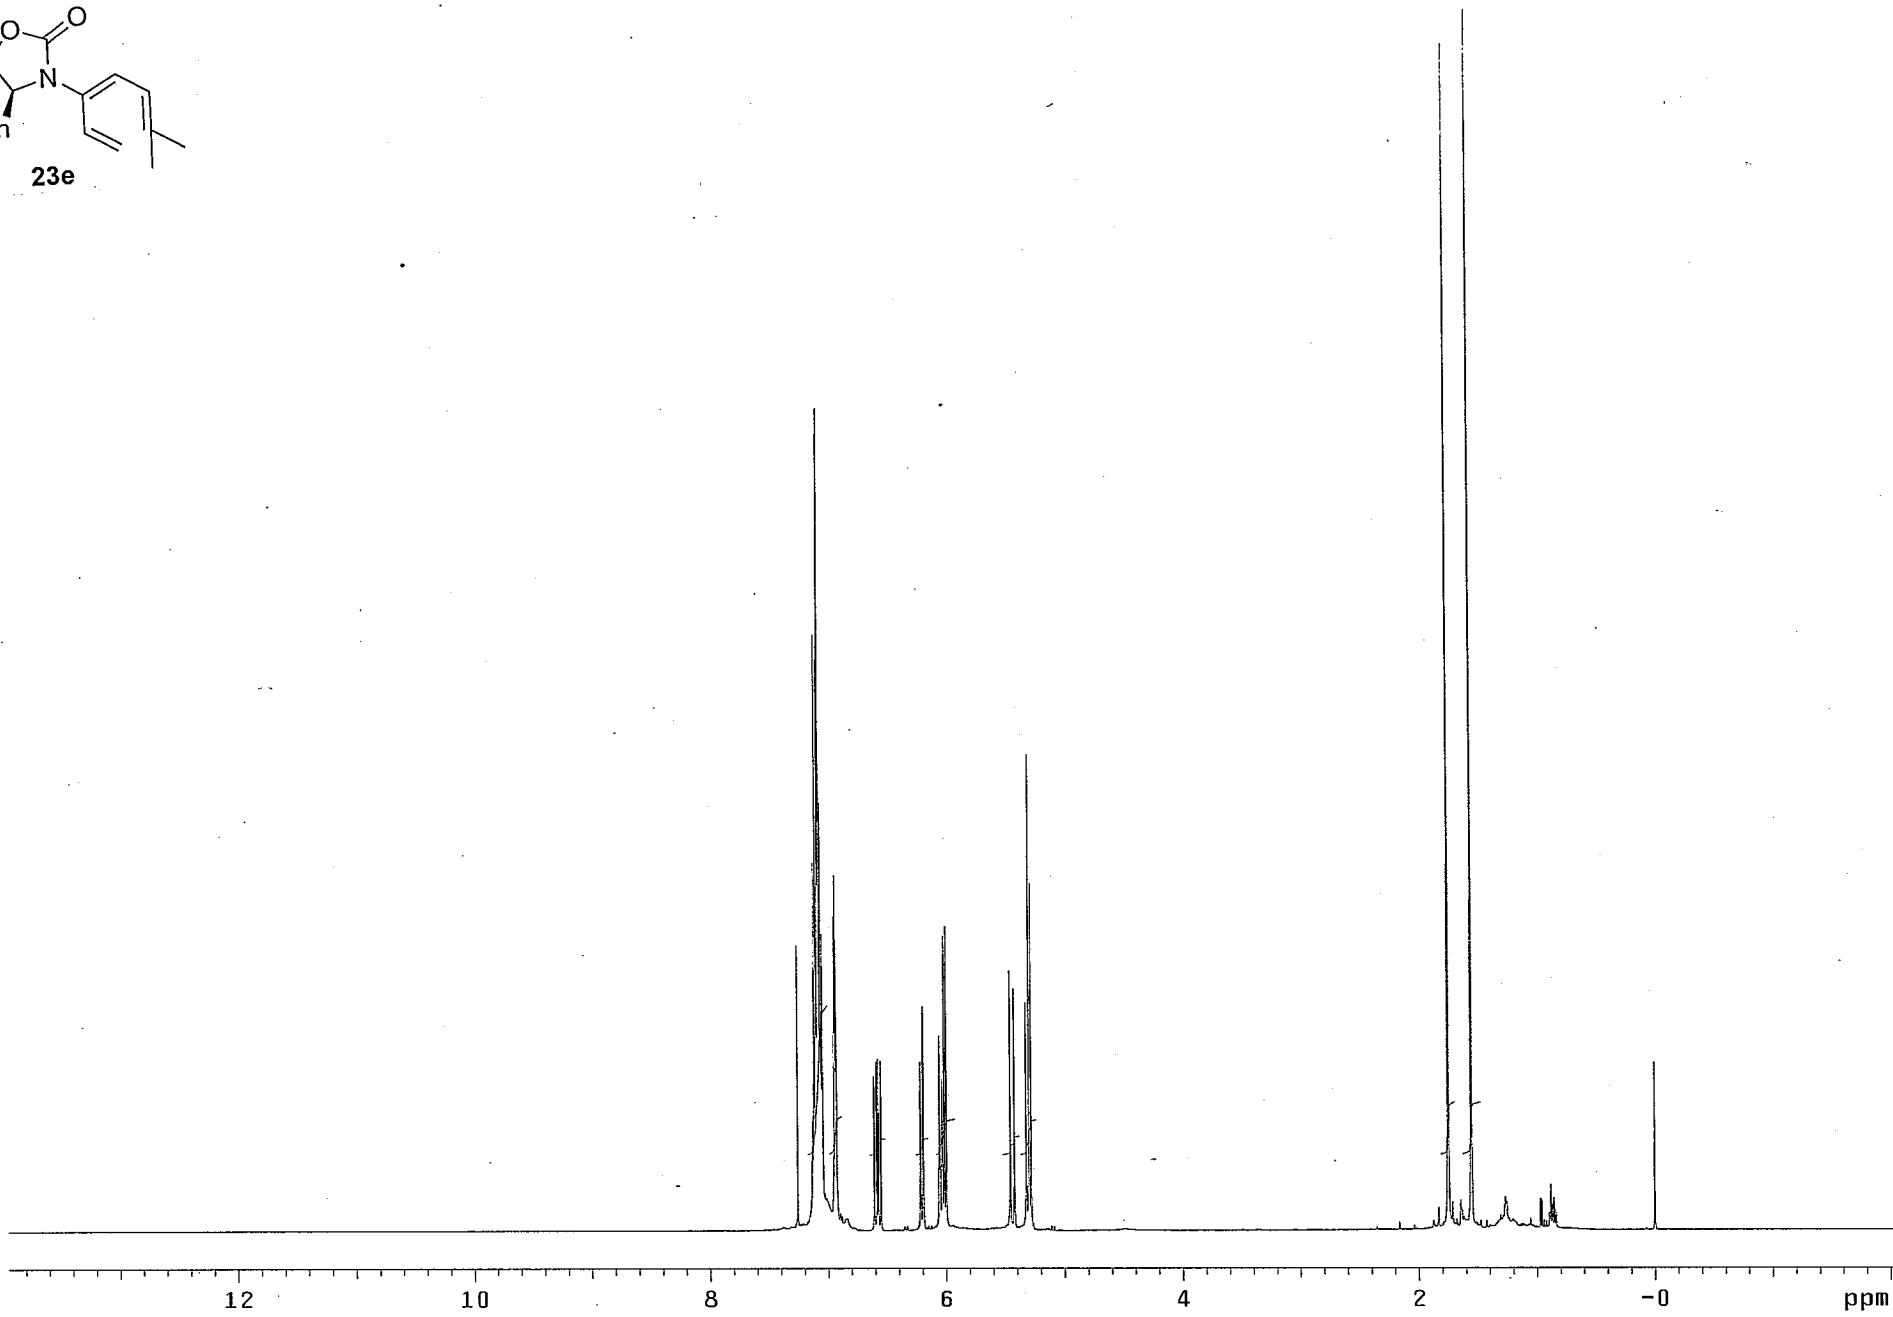

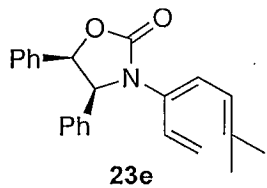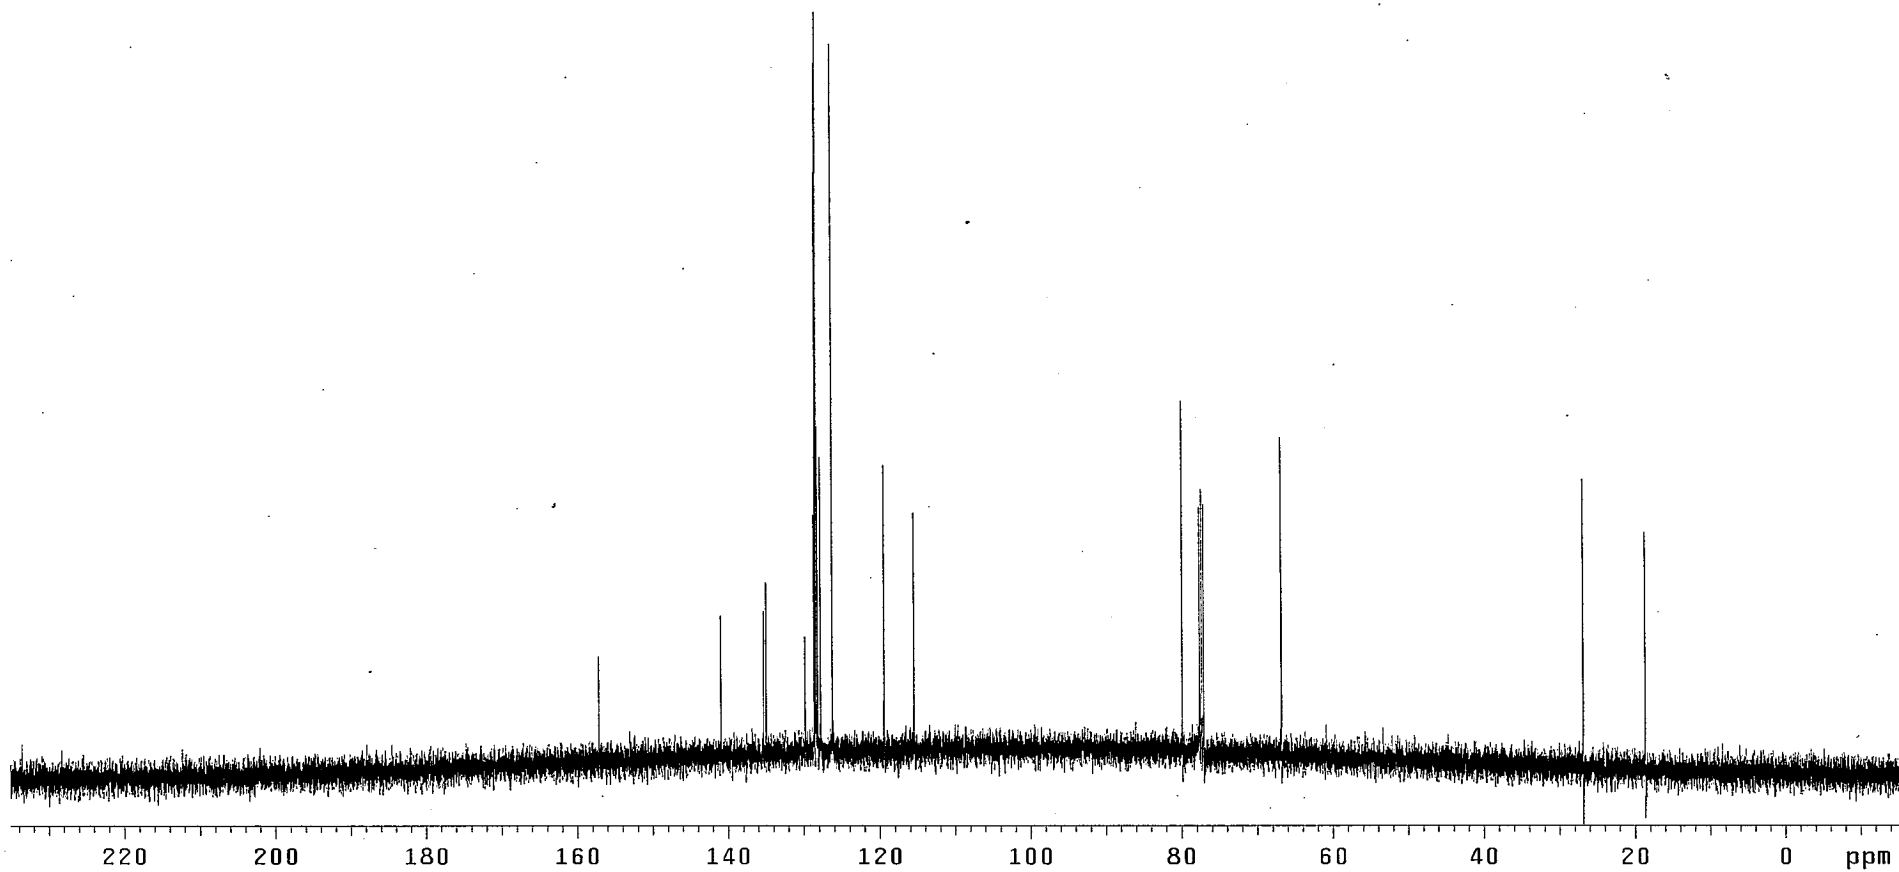

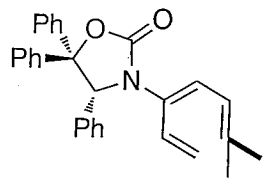

23f

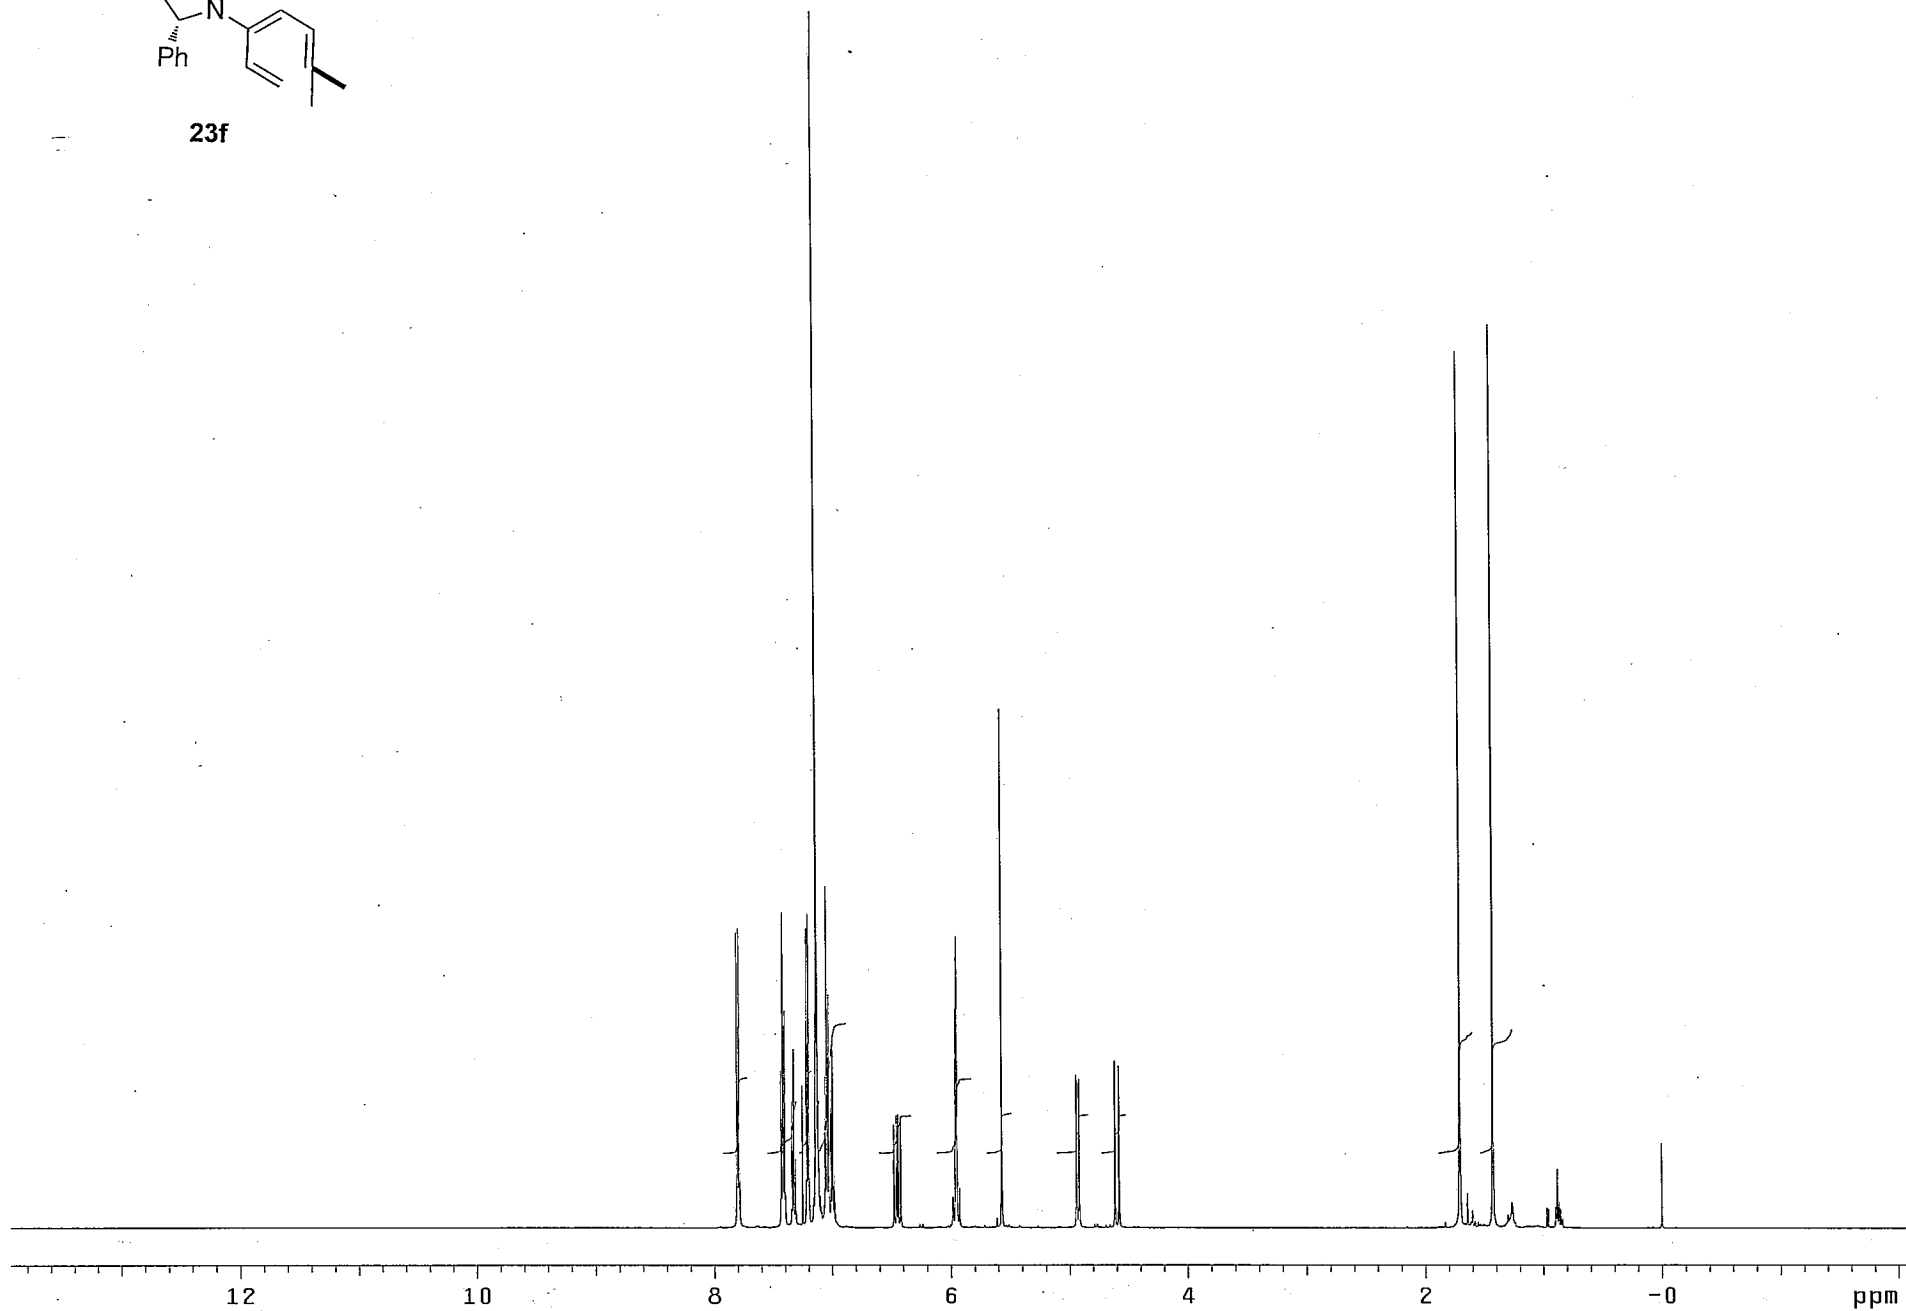

S136

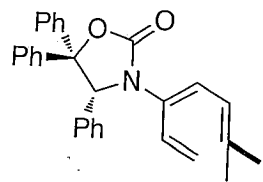

23f

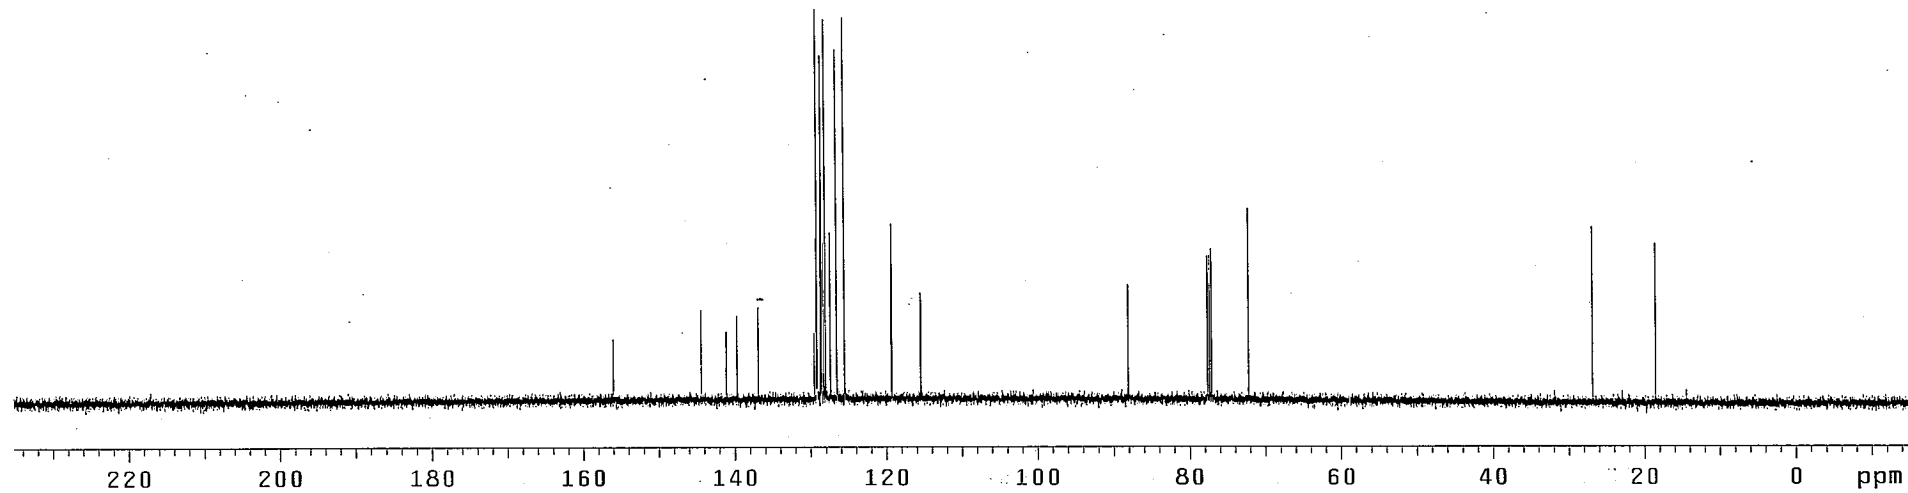

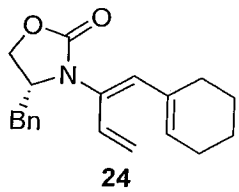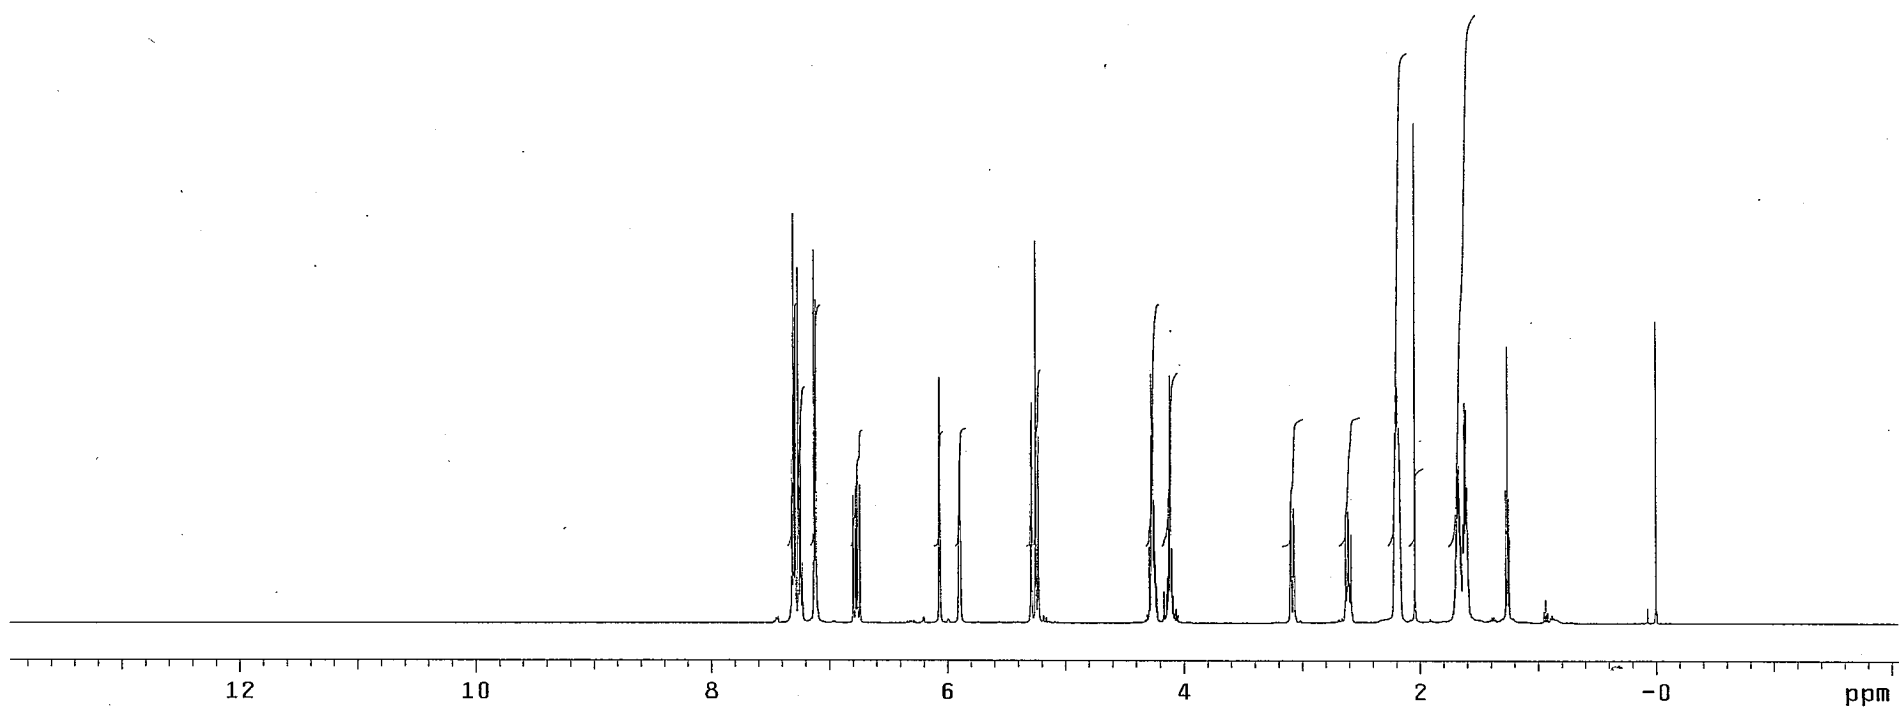

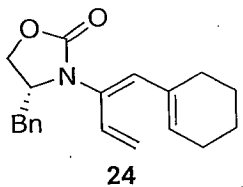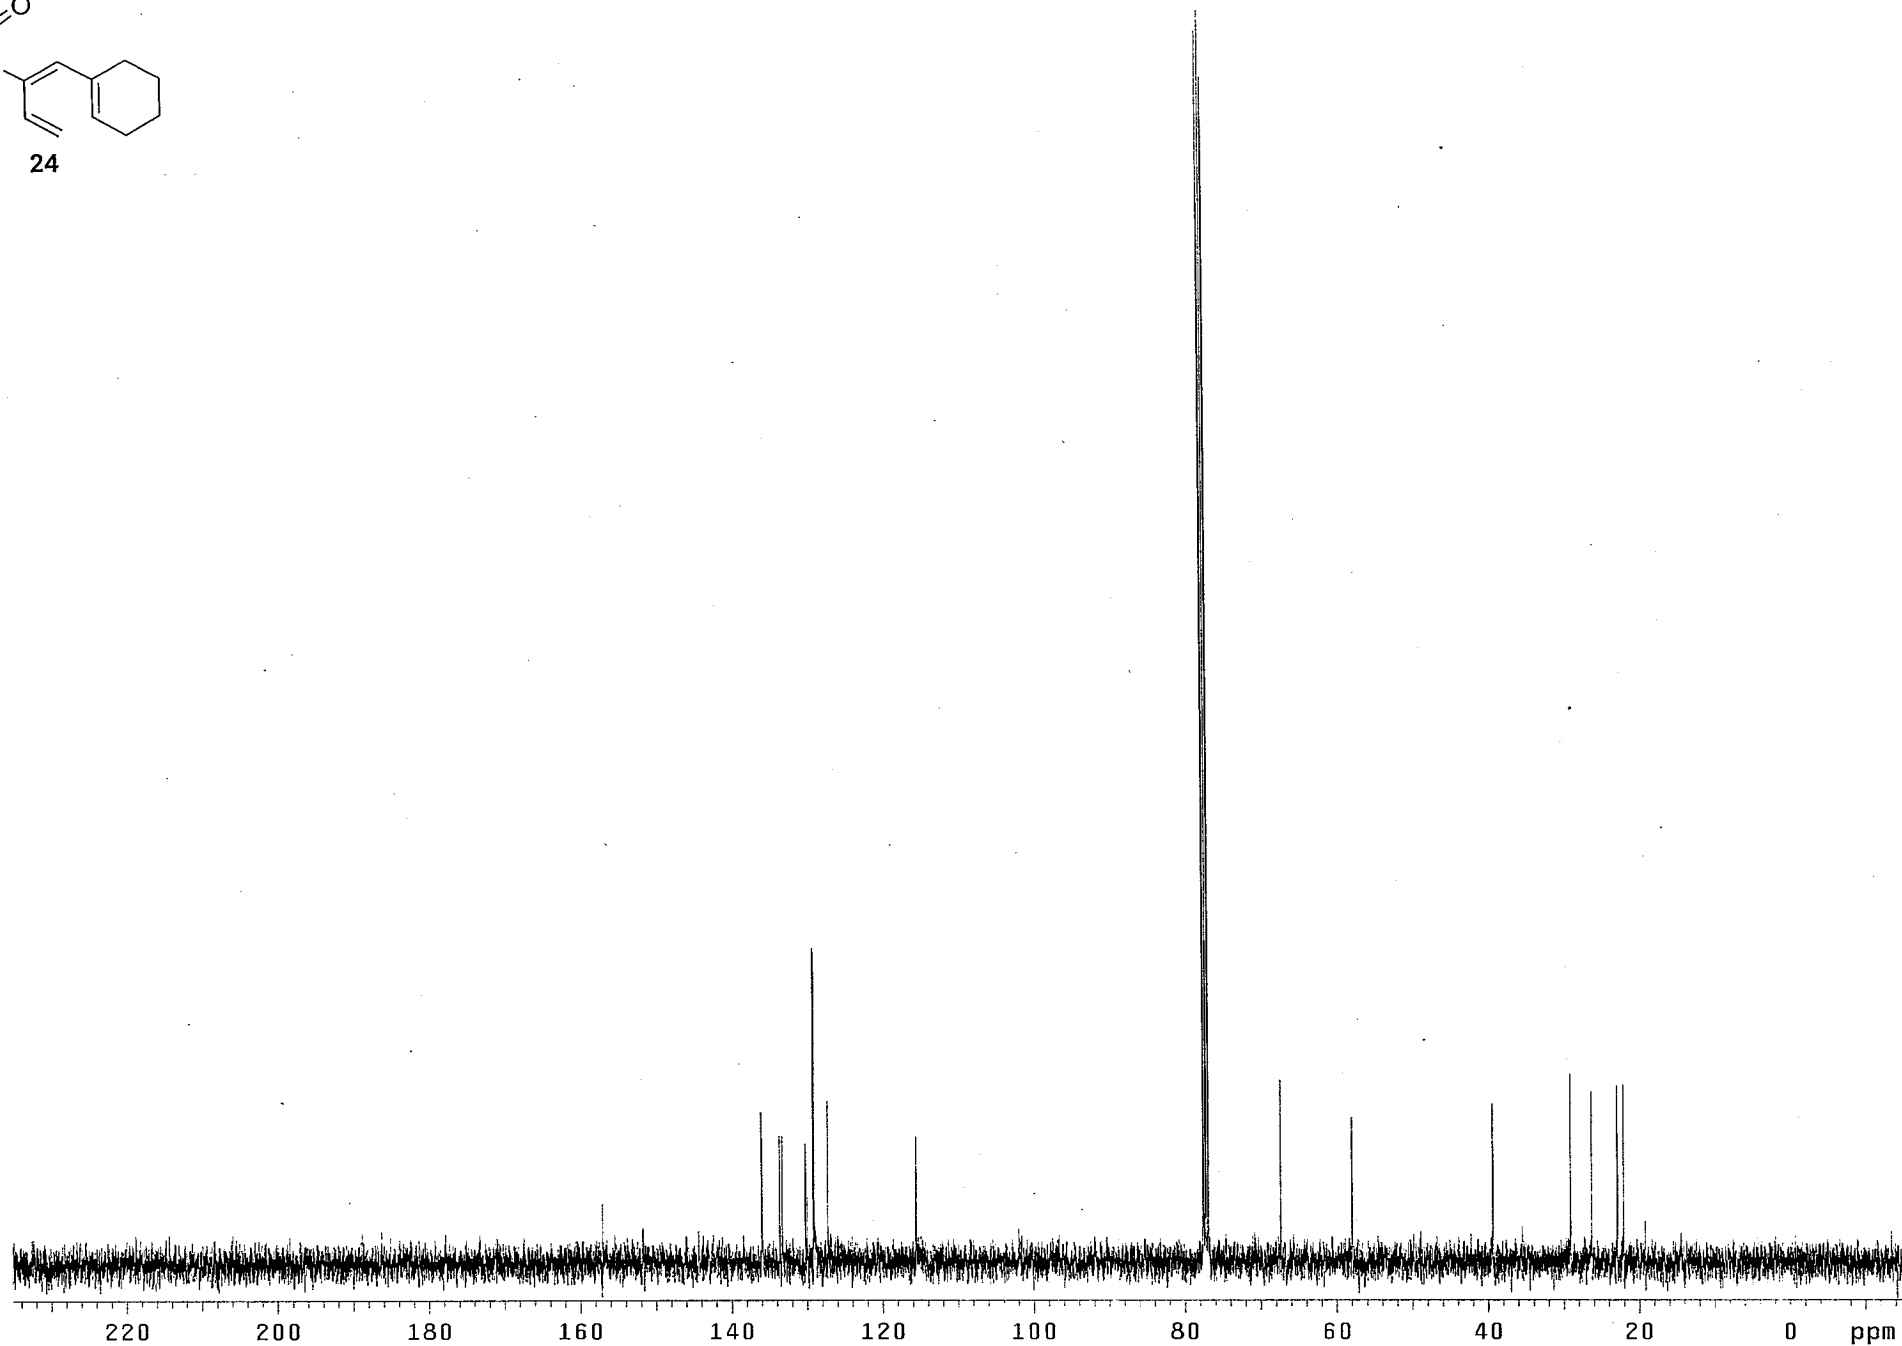

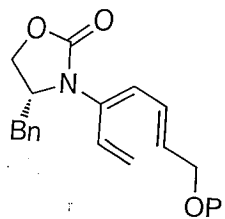

25a: P = TBDPS

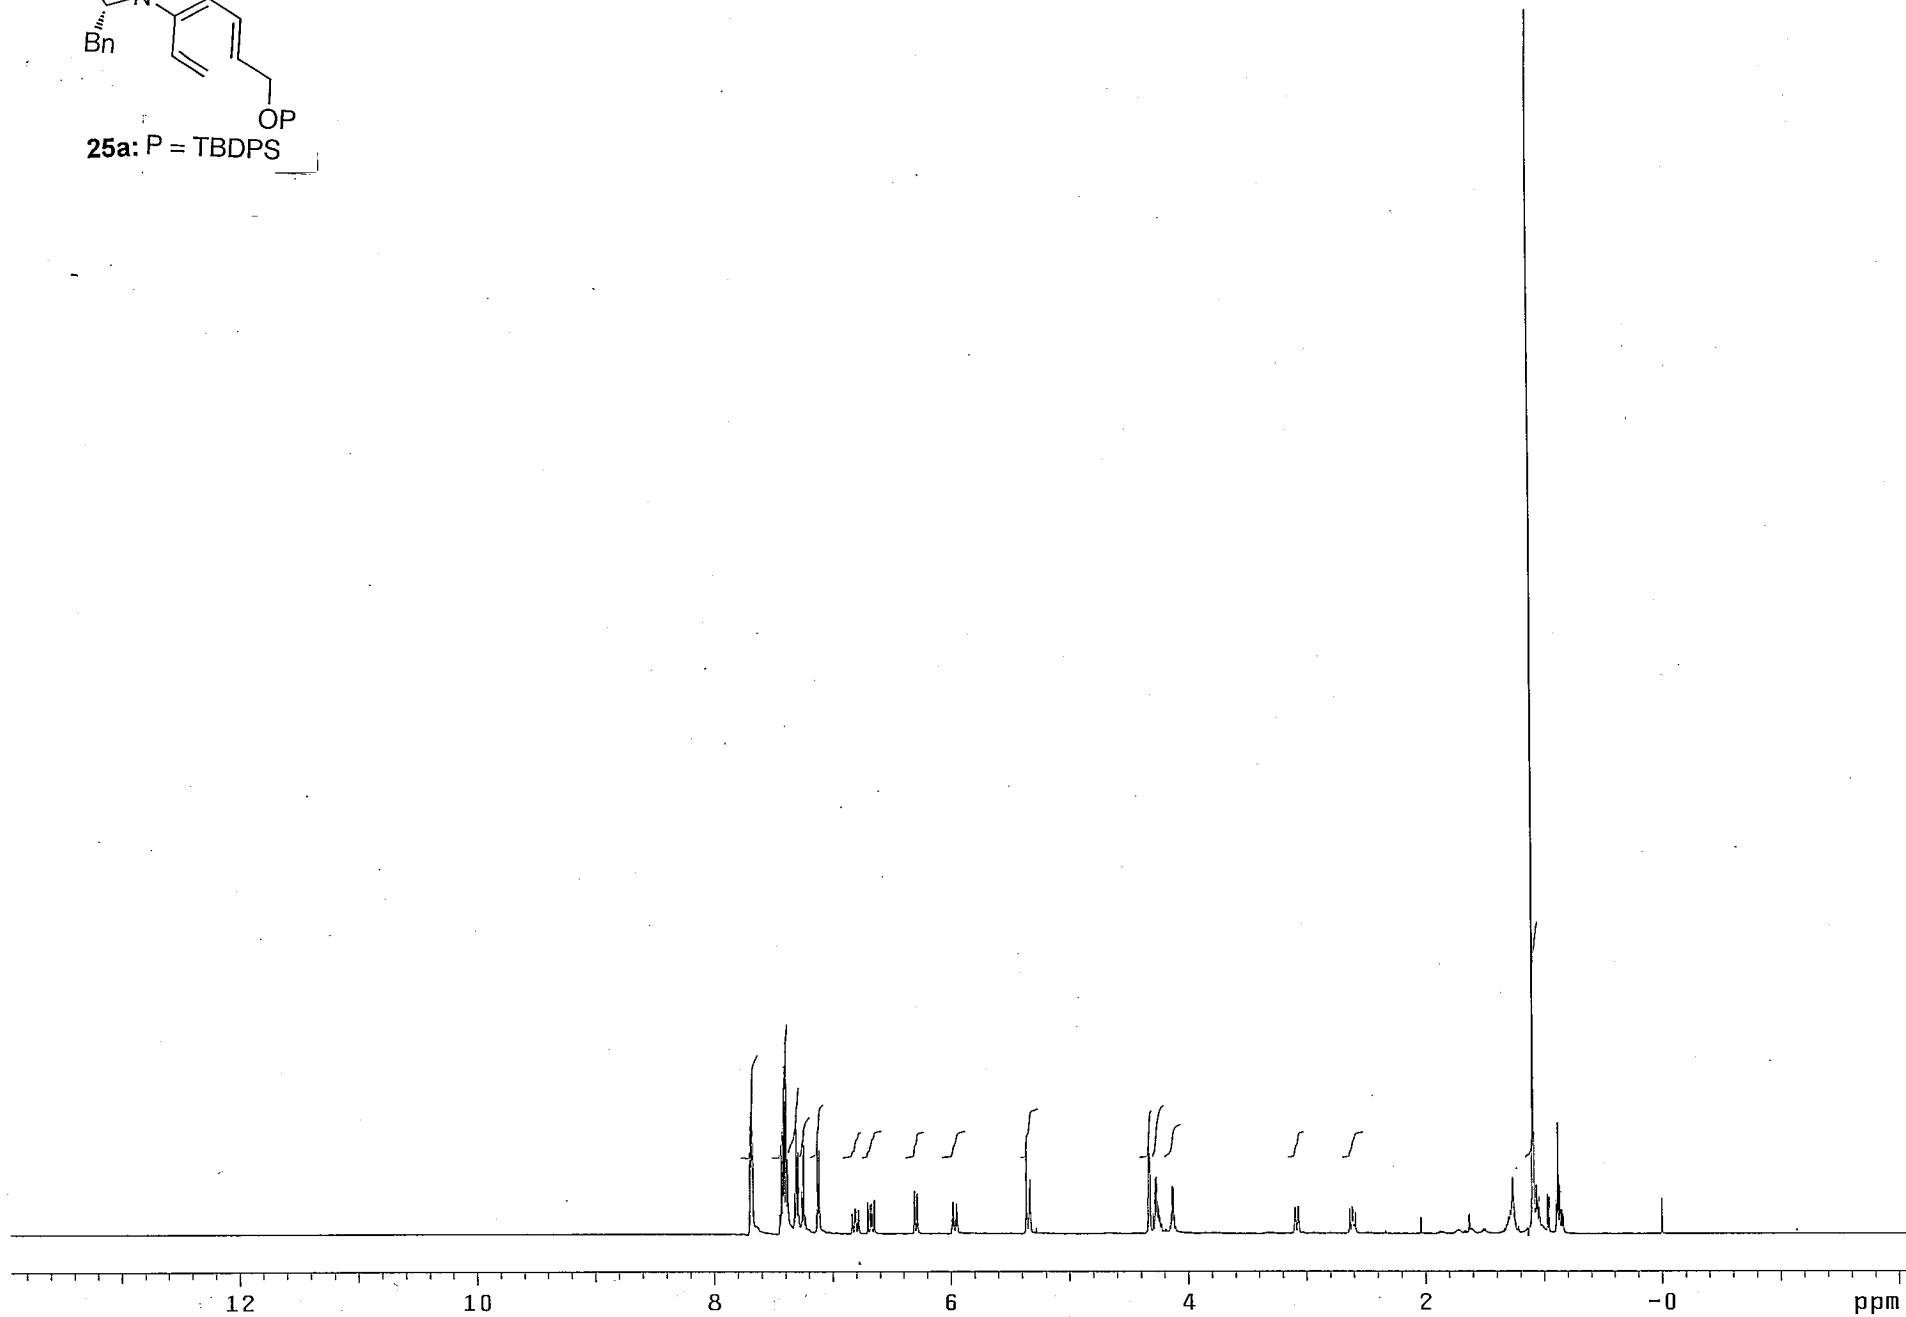

S140

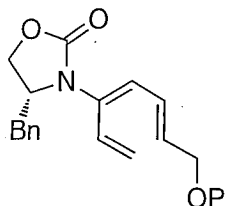

25a: P = TBDPS

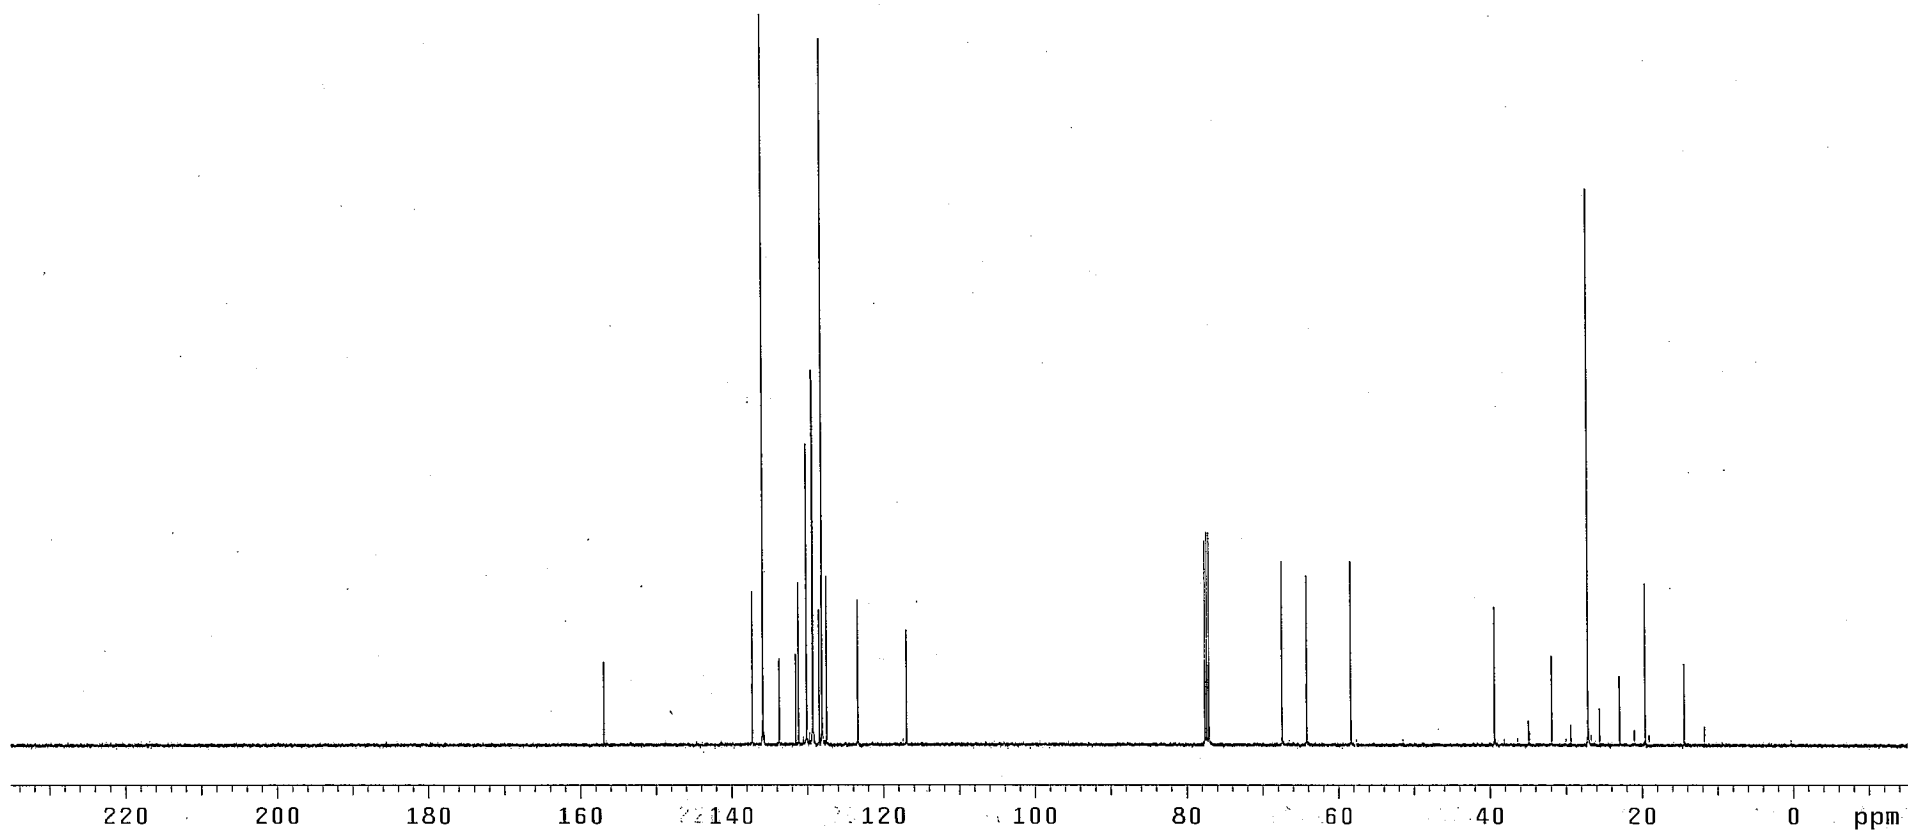



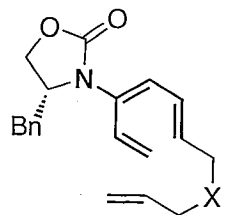

25b: X = O

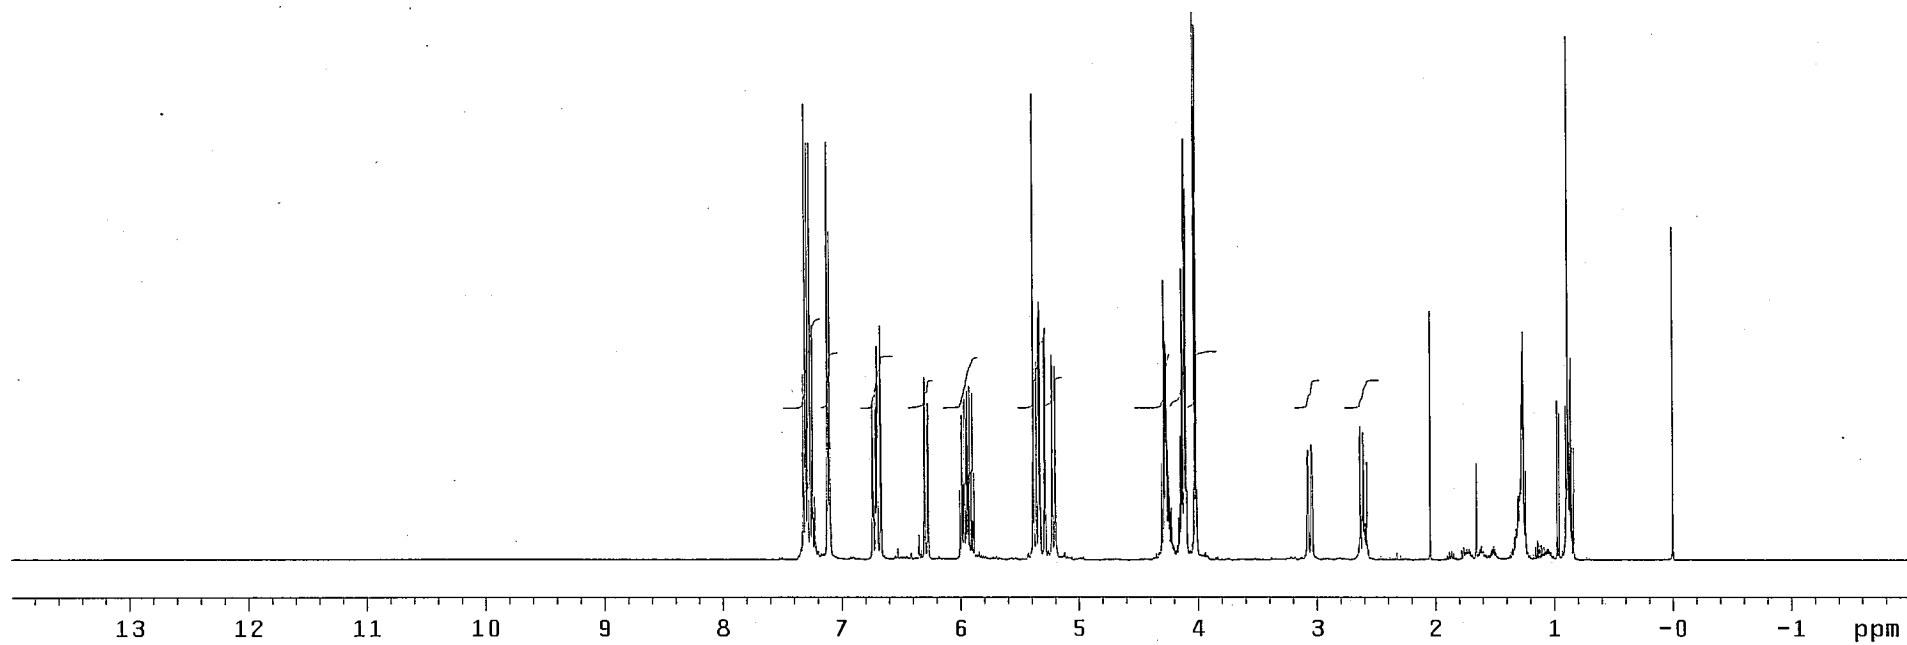

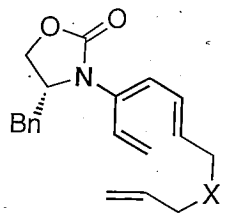

25b: X = O

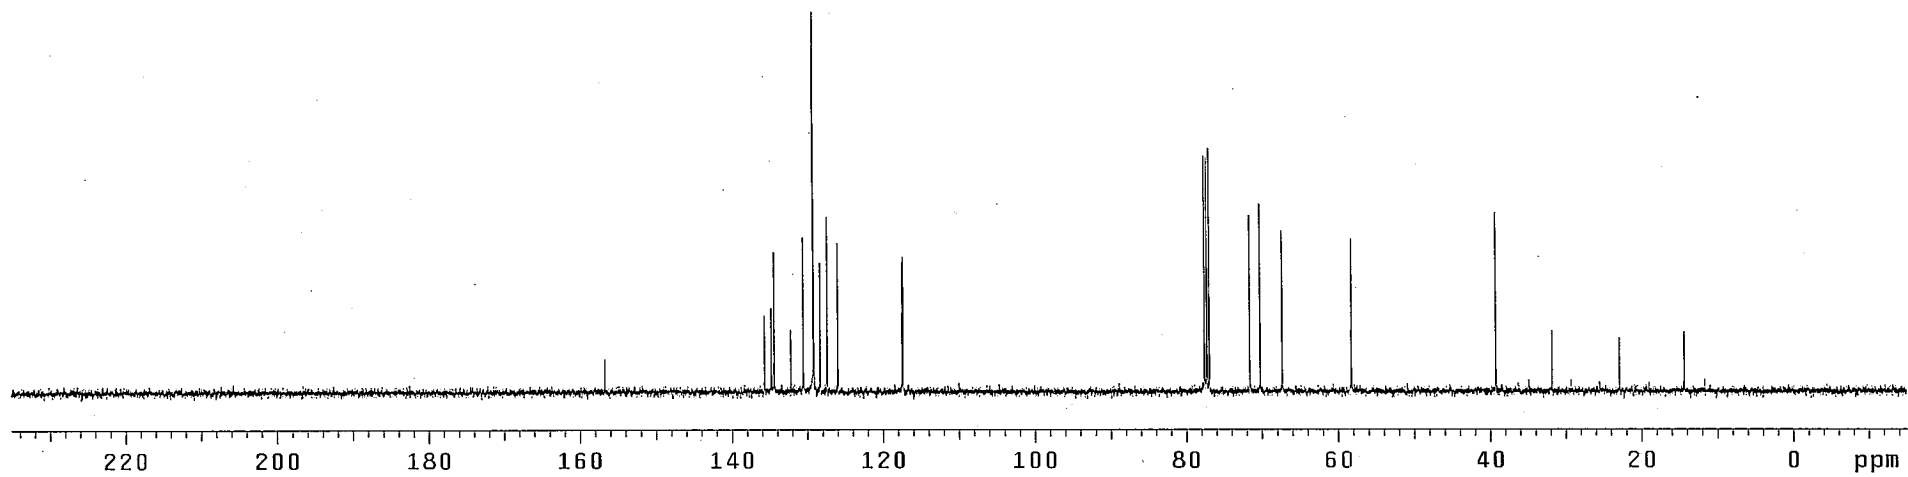

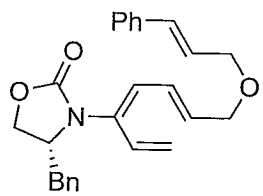

25c

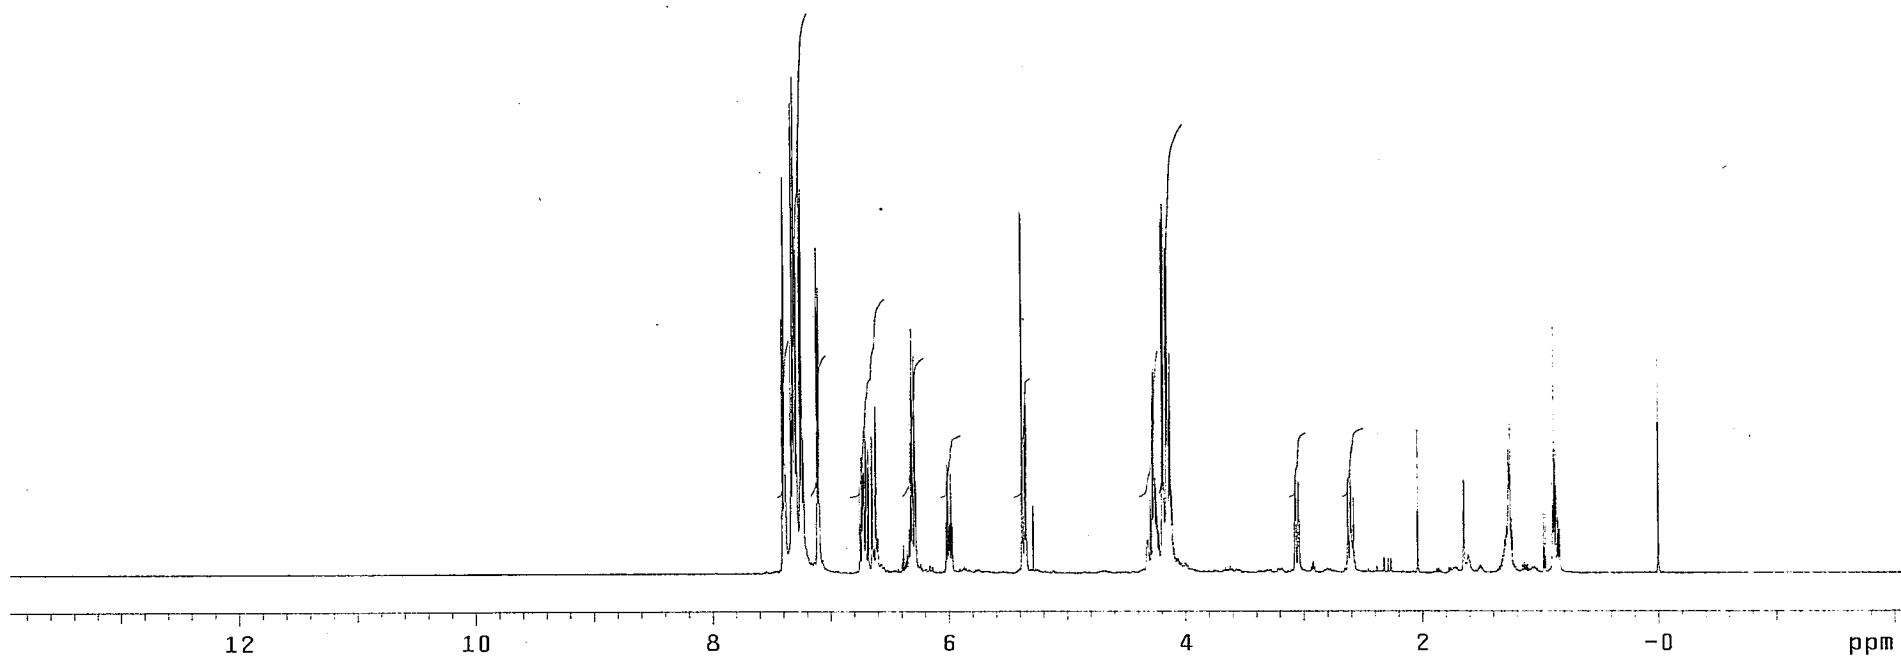

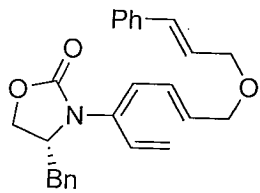

25c

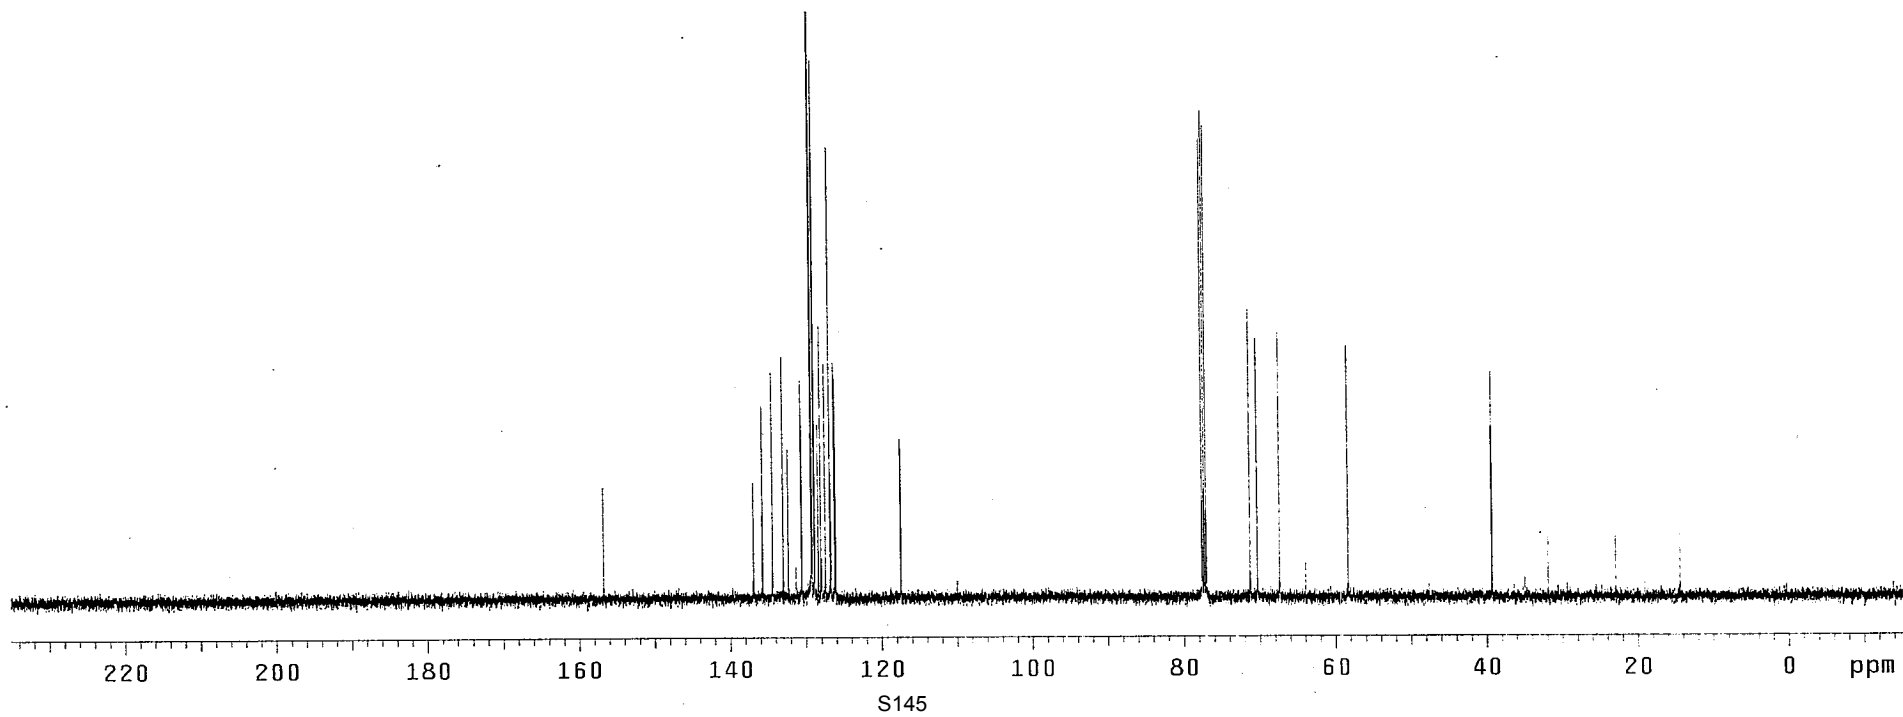

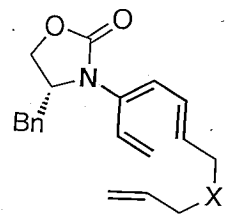

26 X = NTs

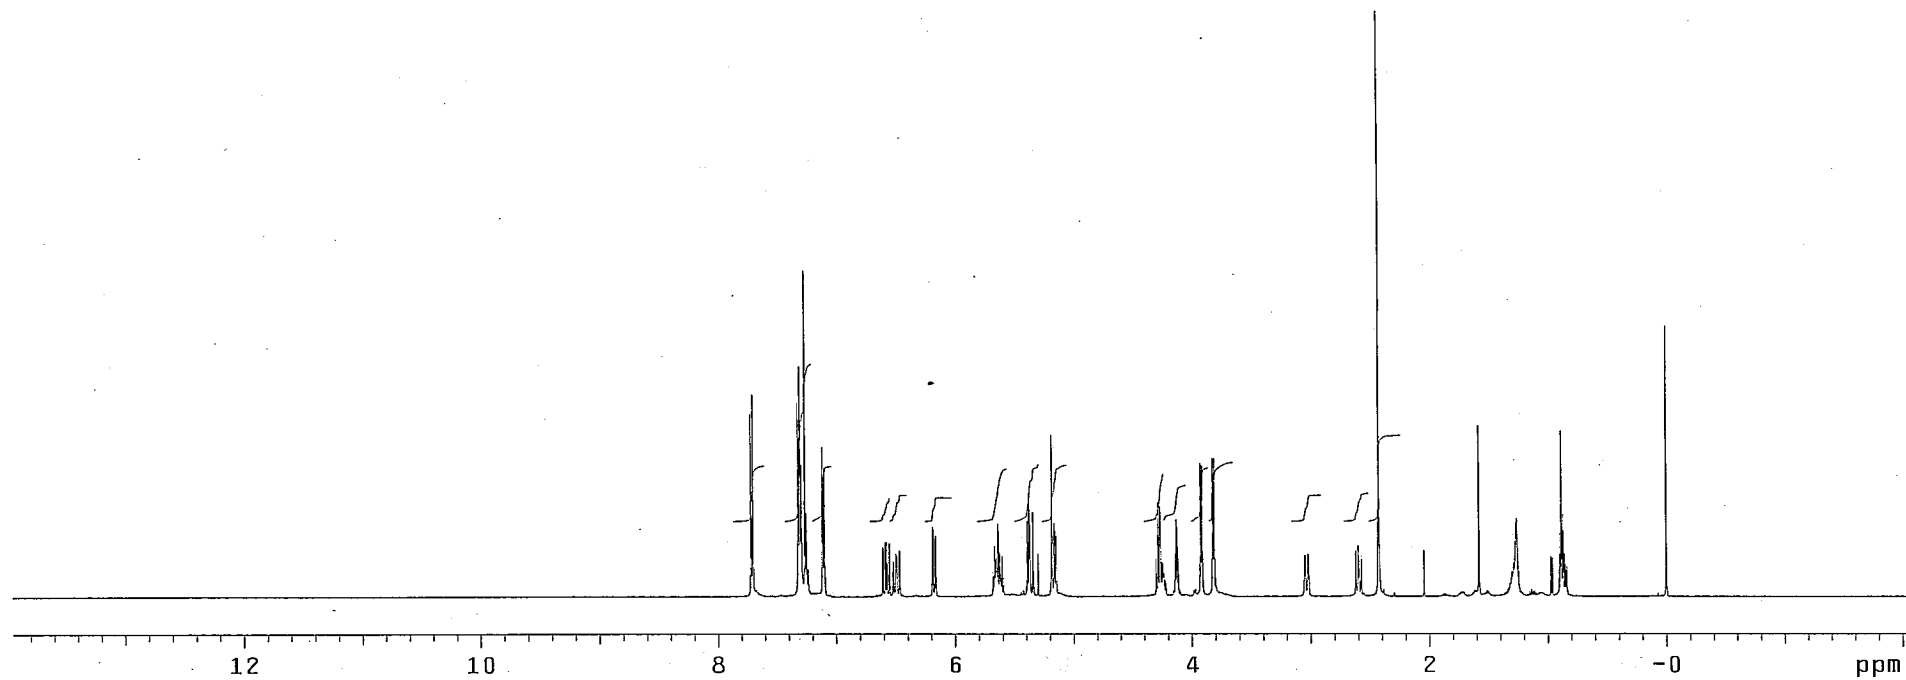

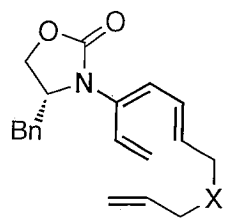

26

X = NTs

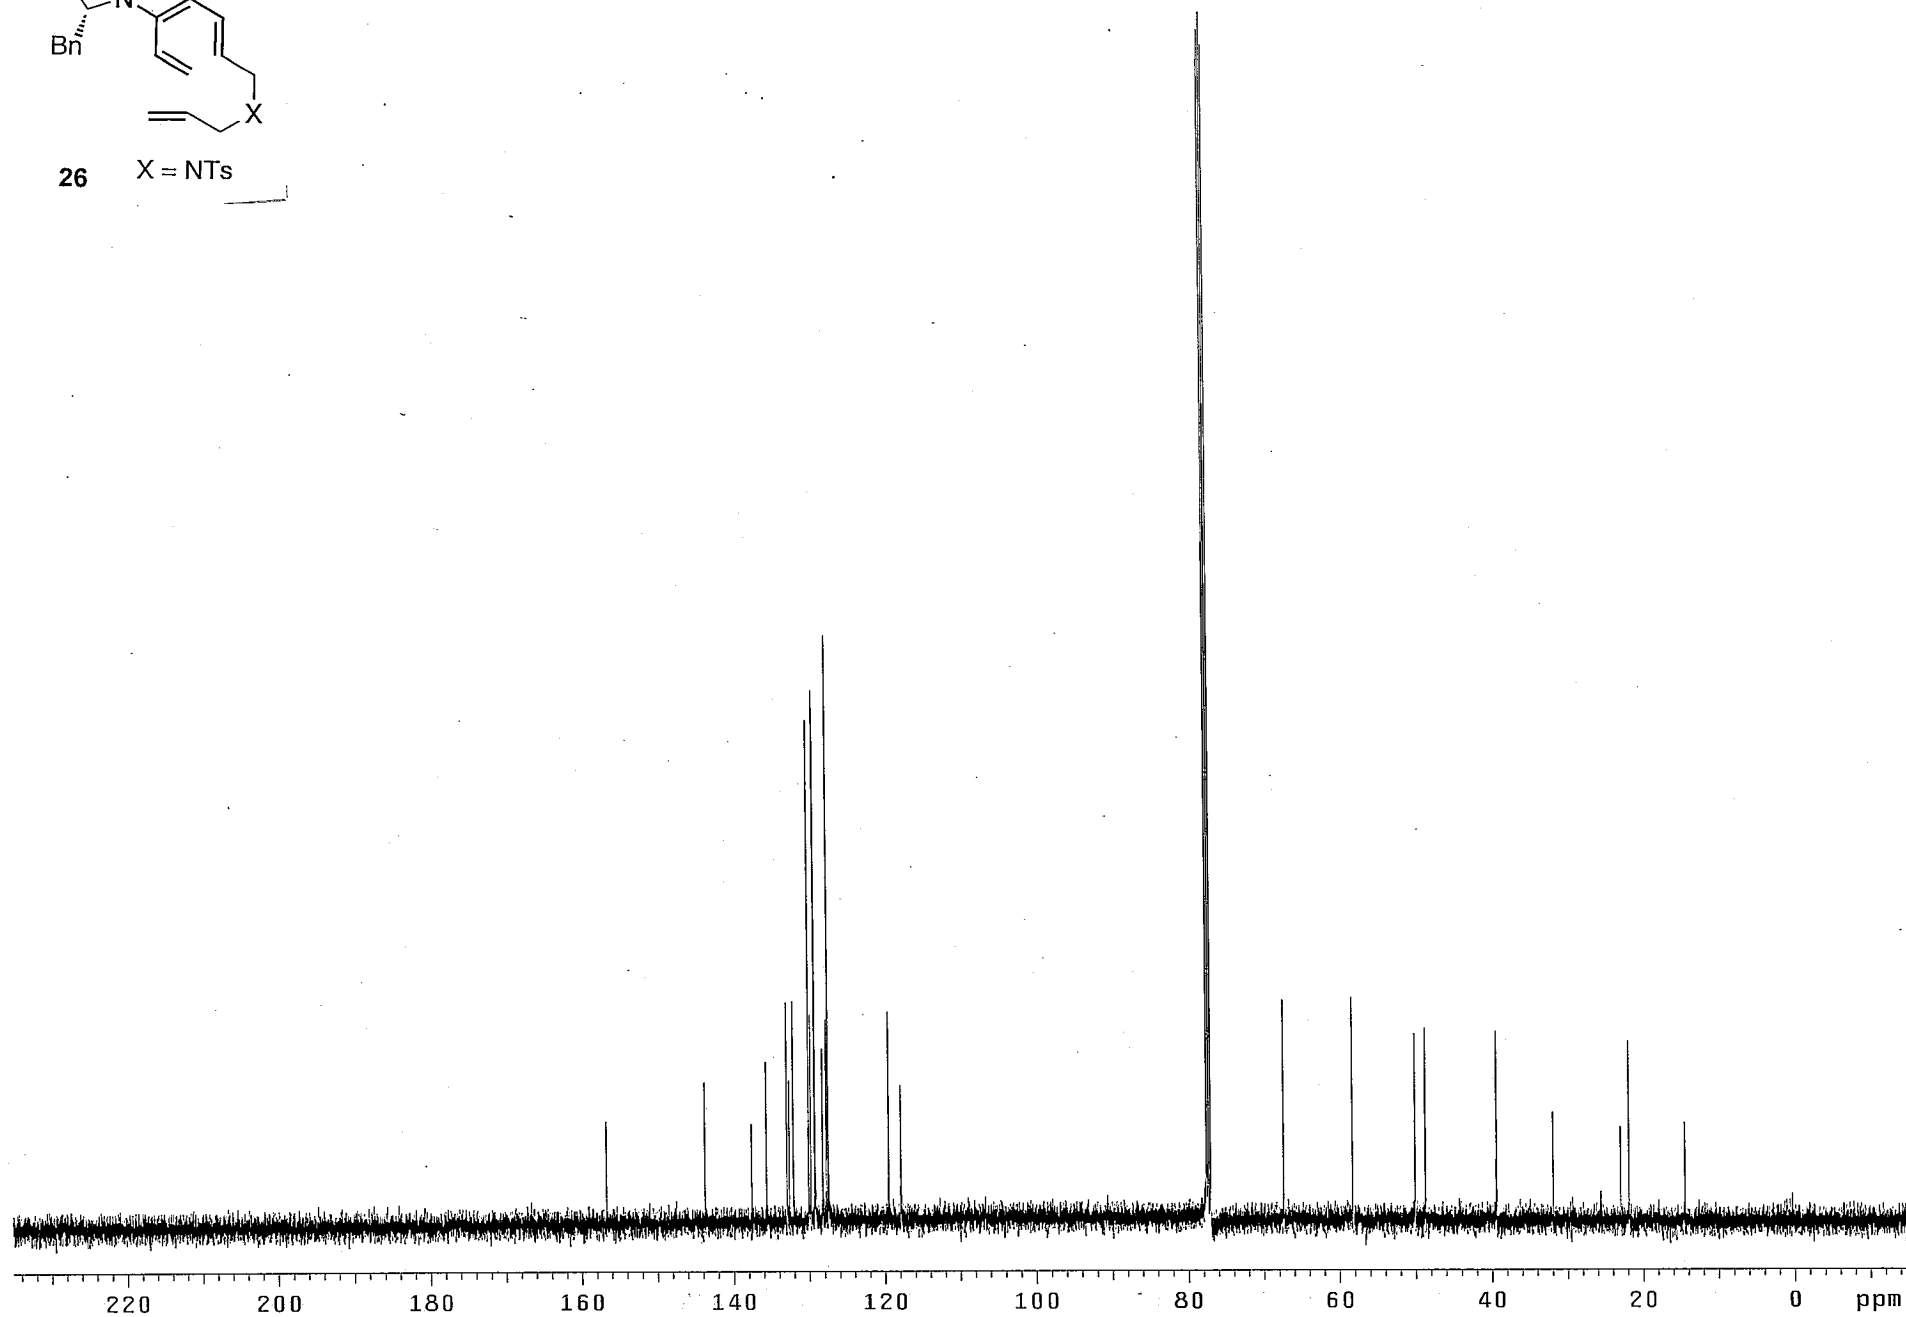

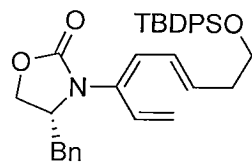

27

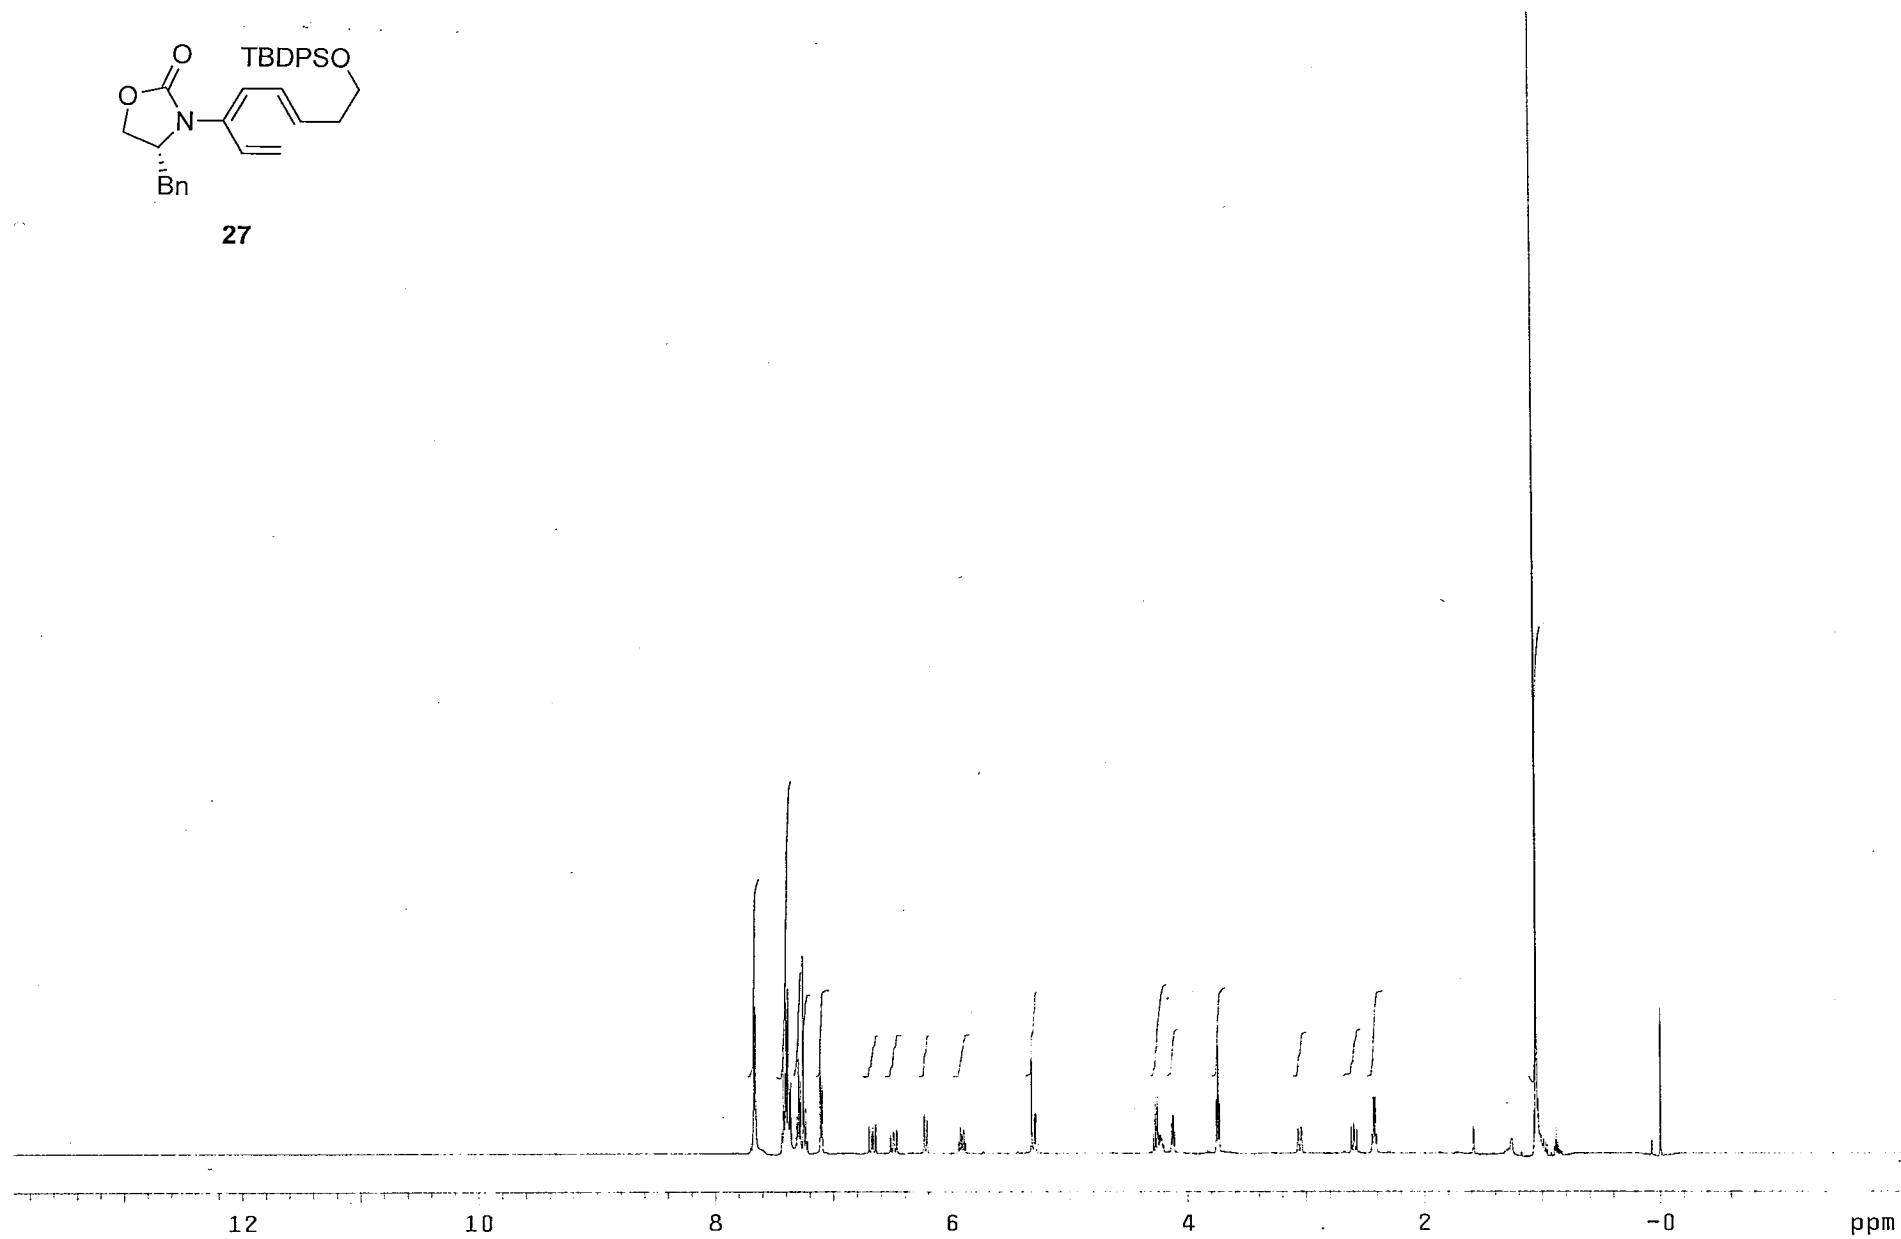

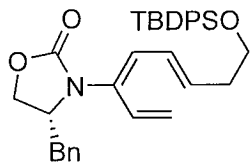

27

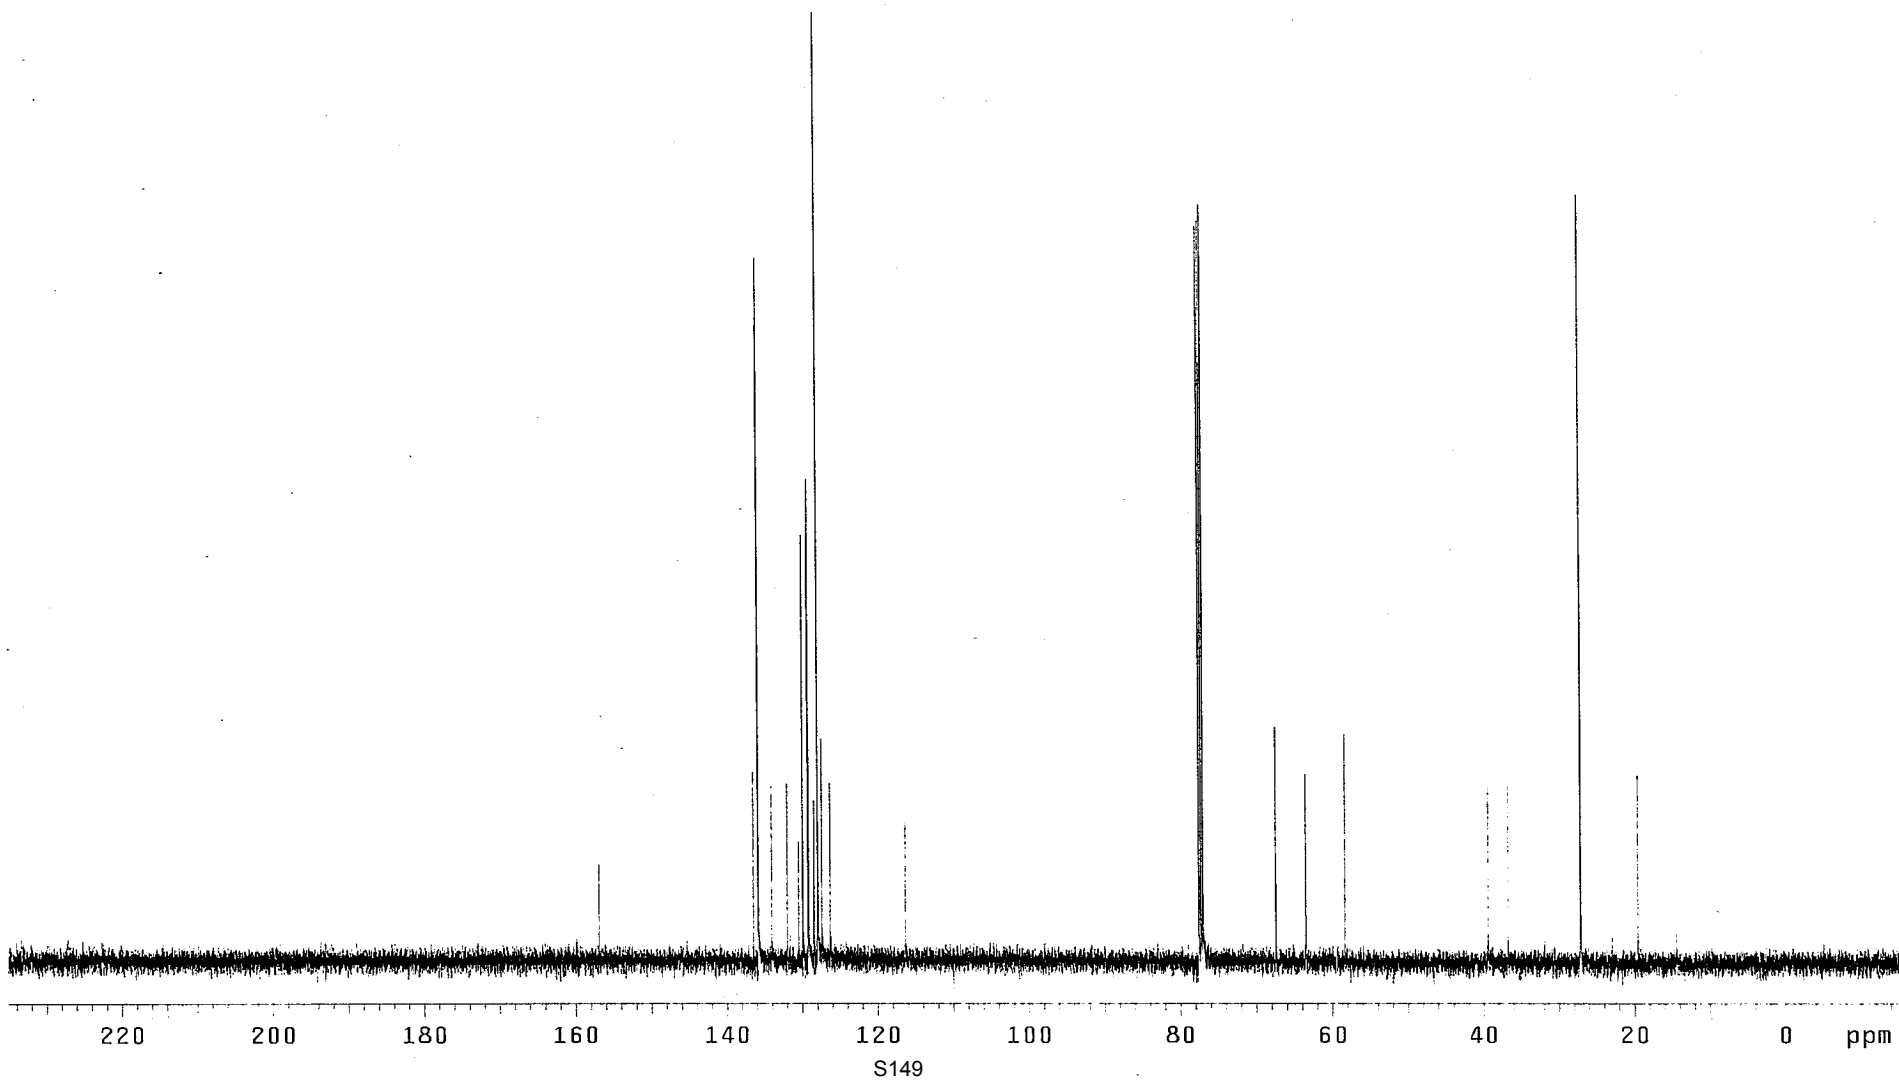



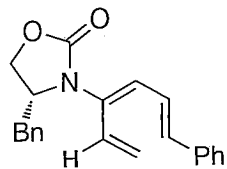

28

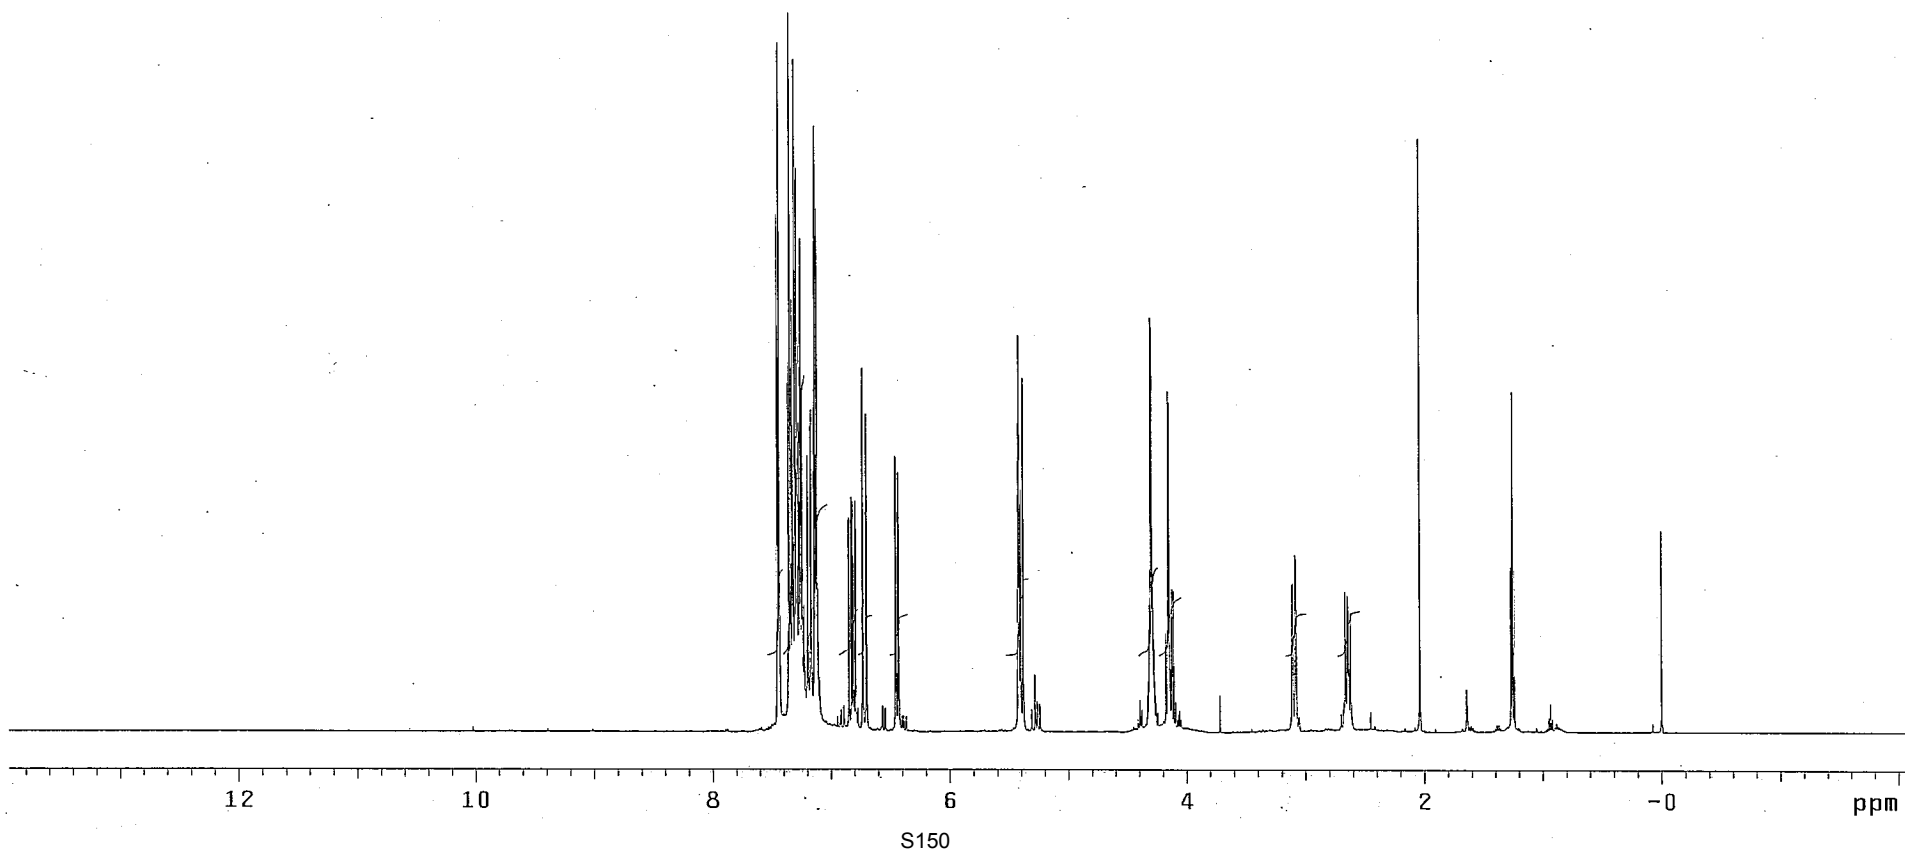

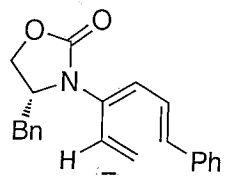

28

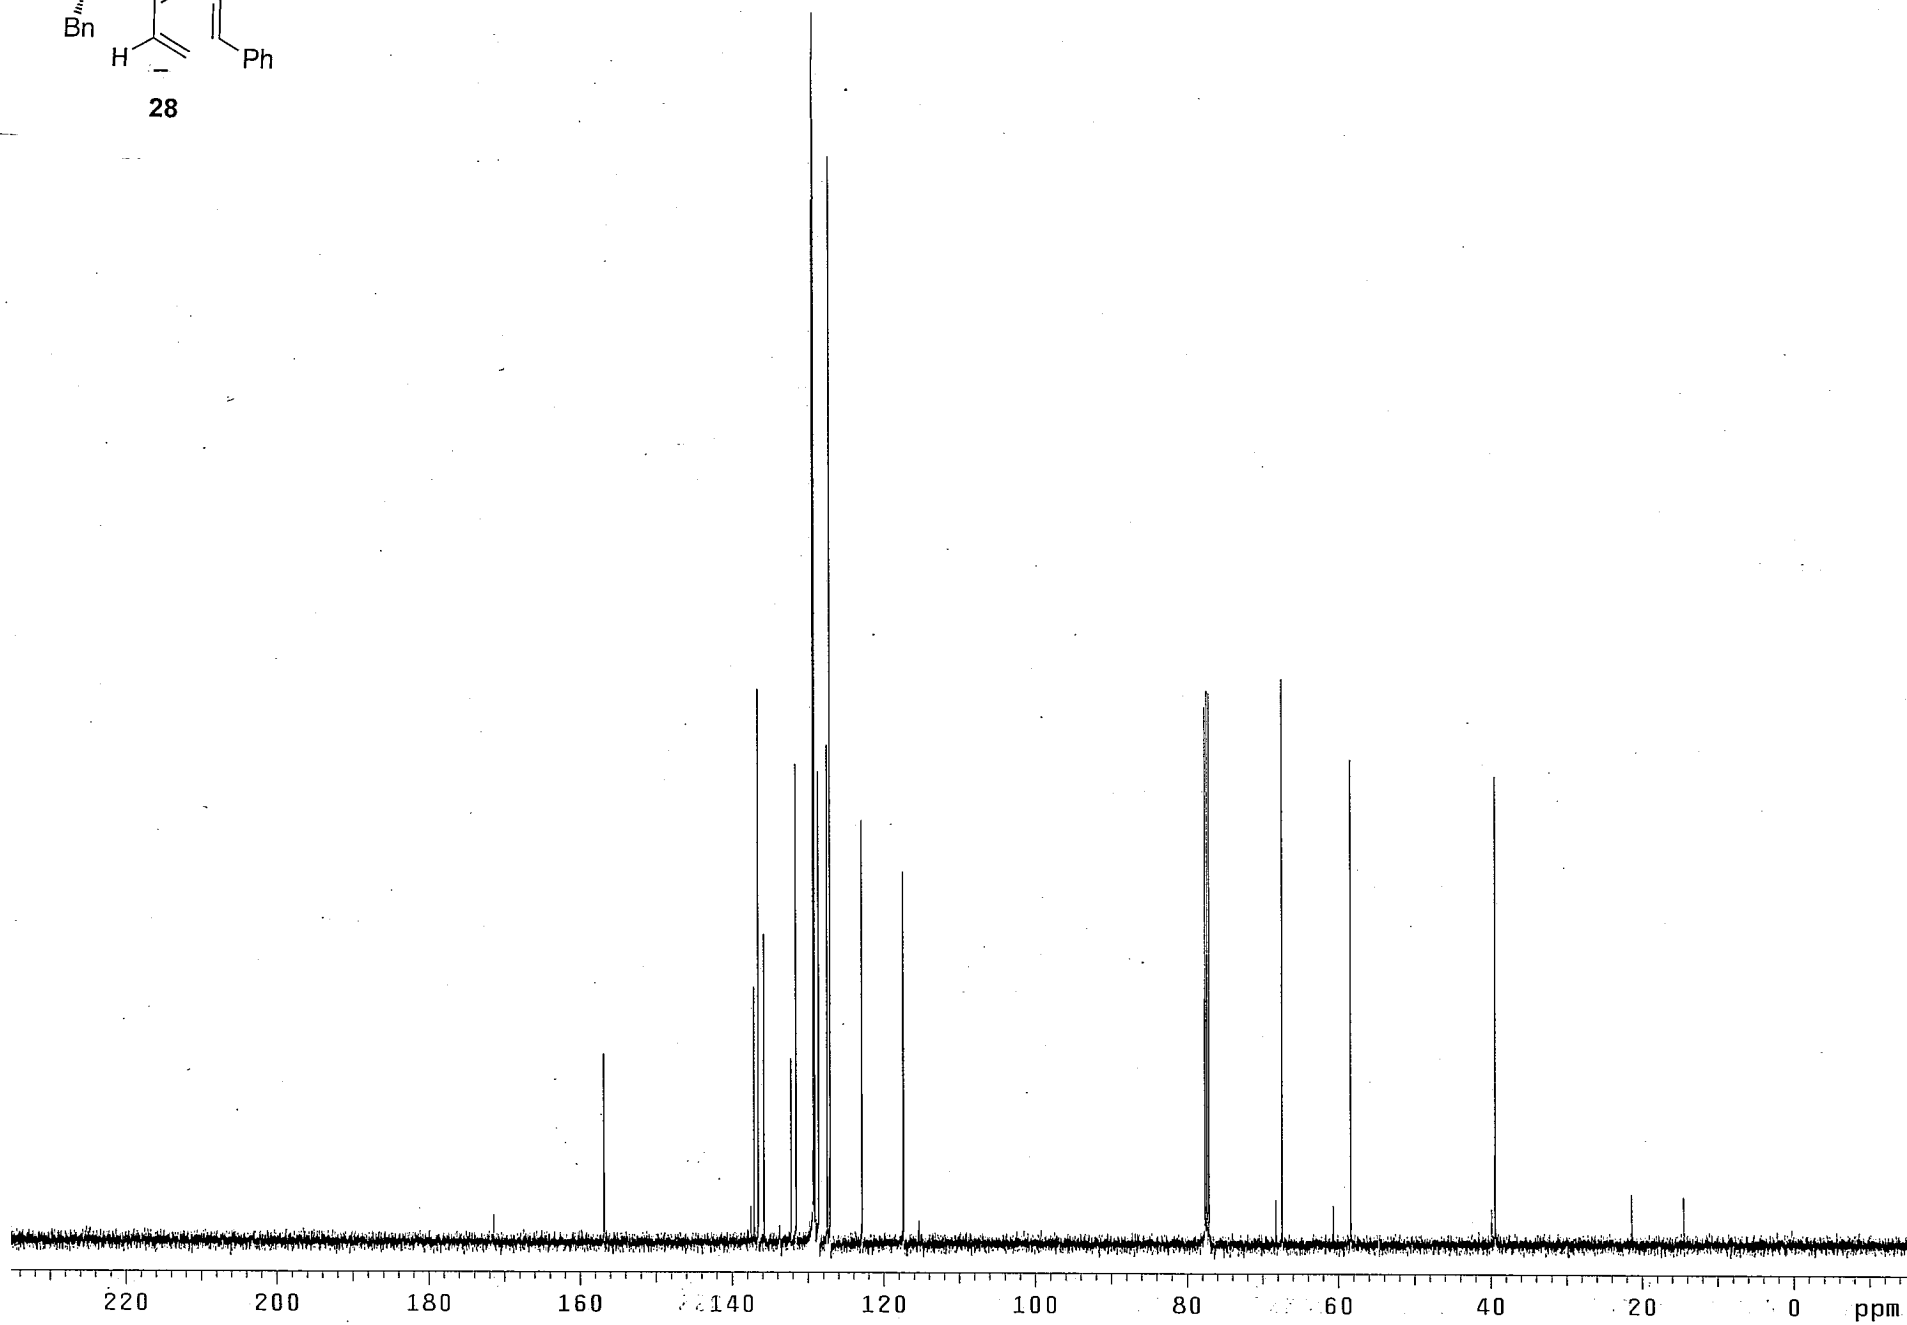

S151

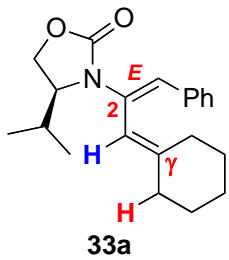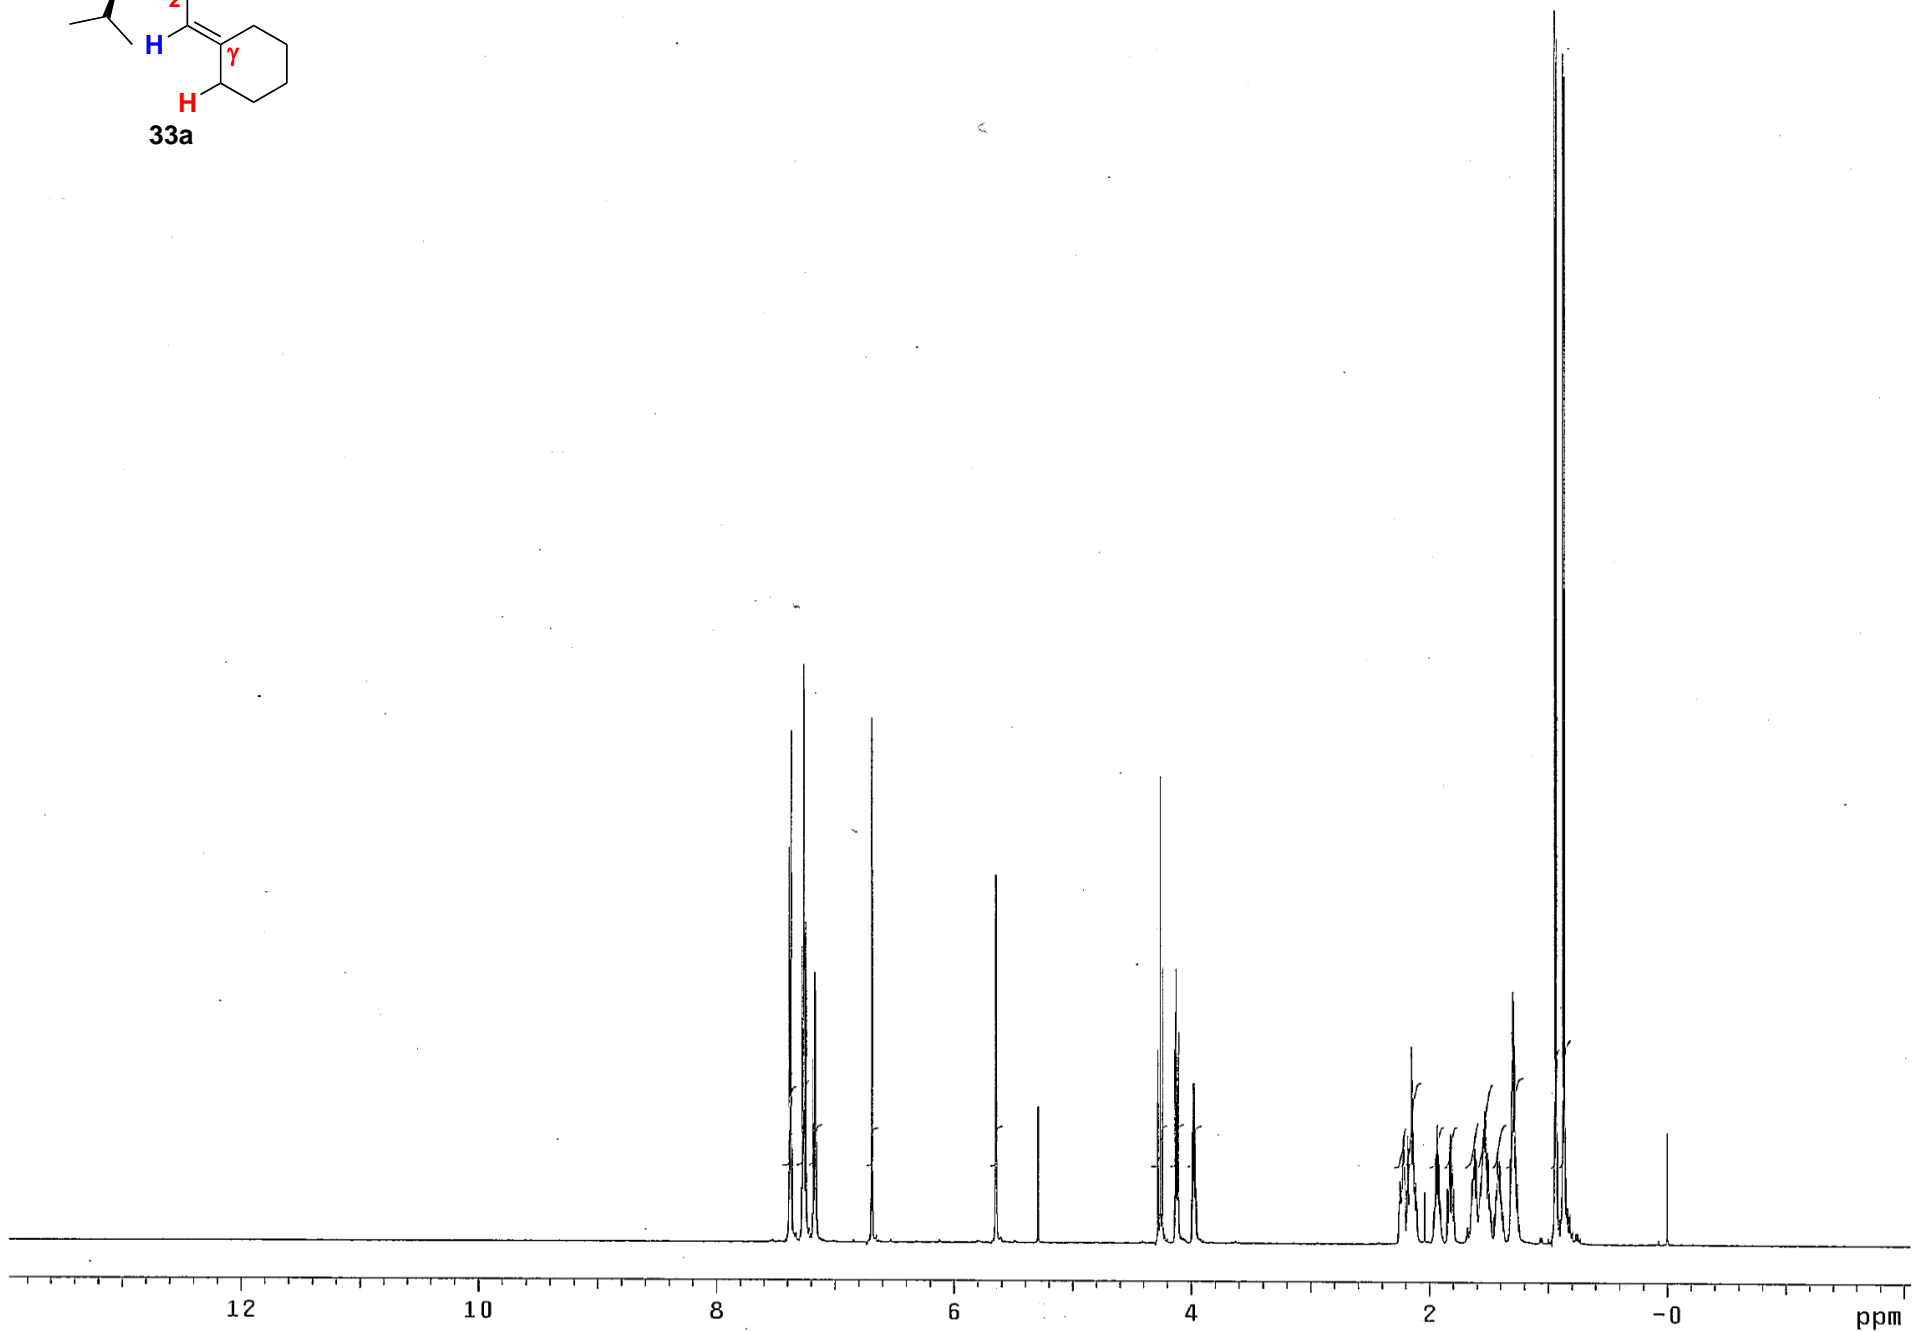

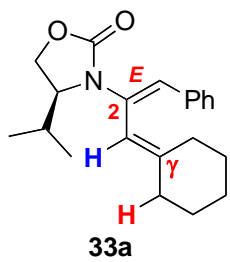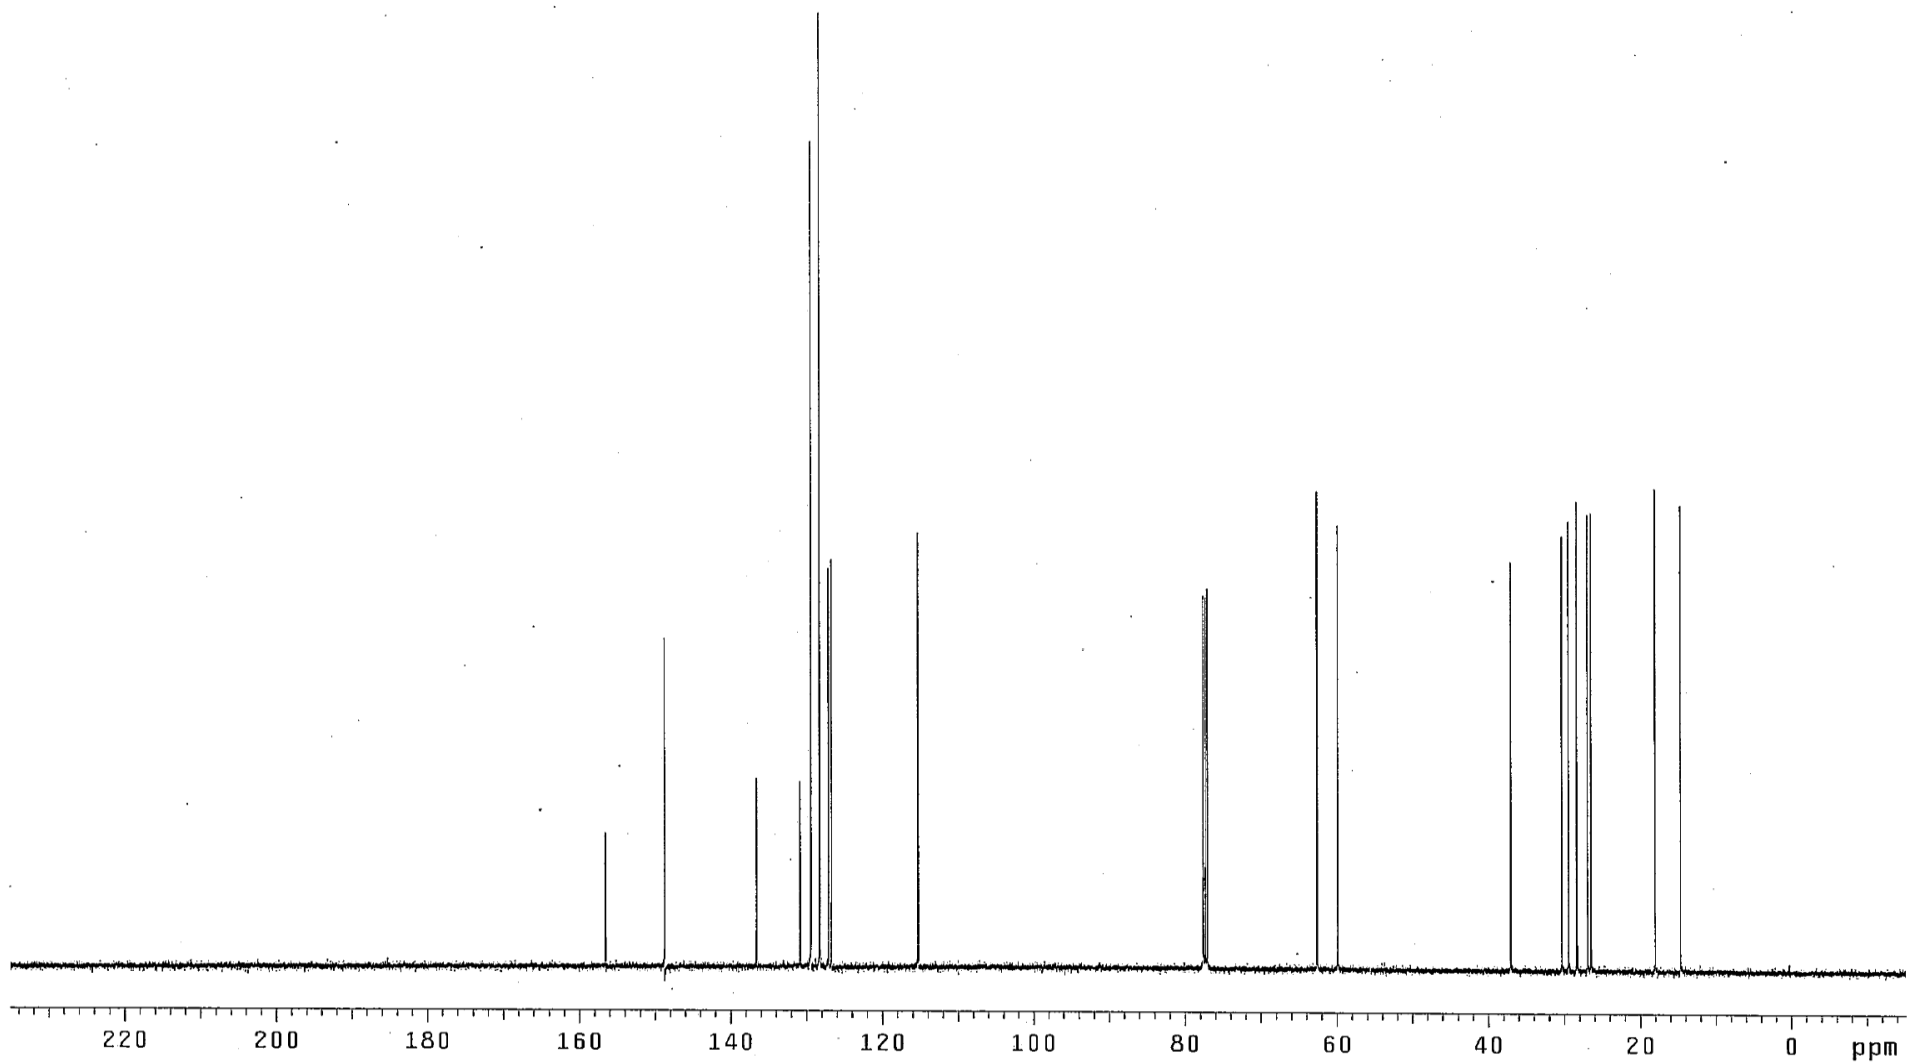

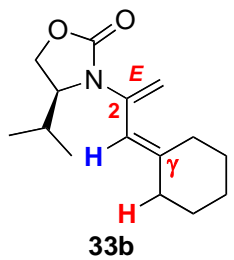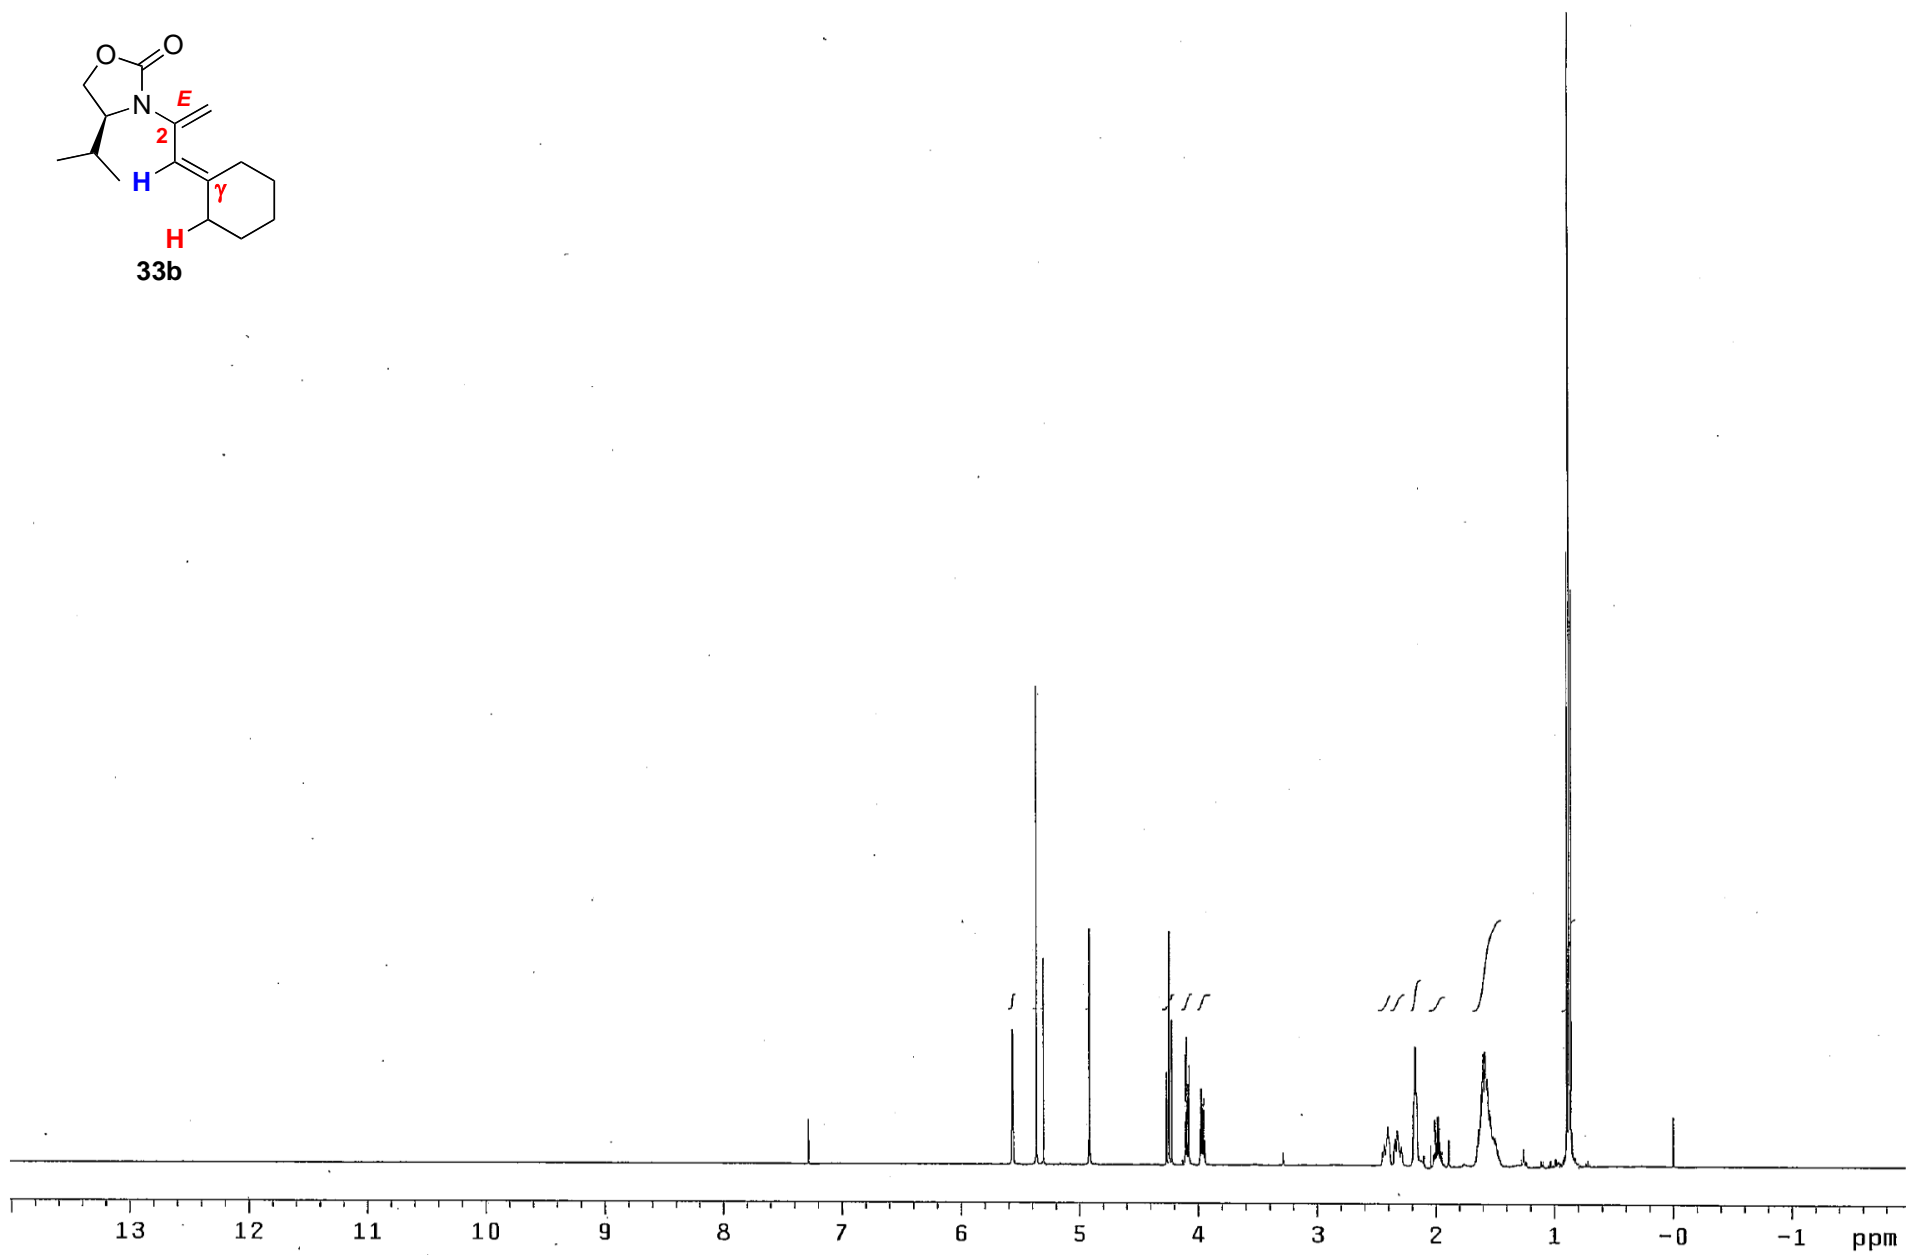

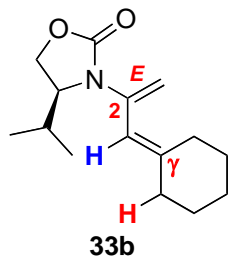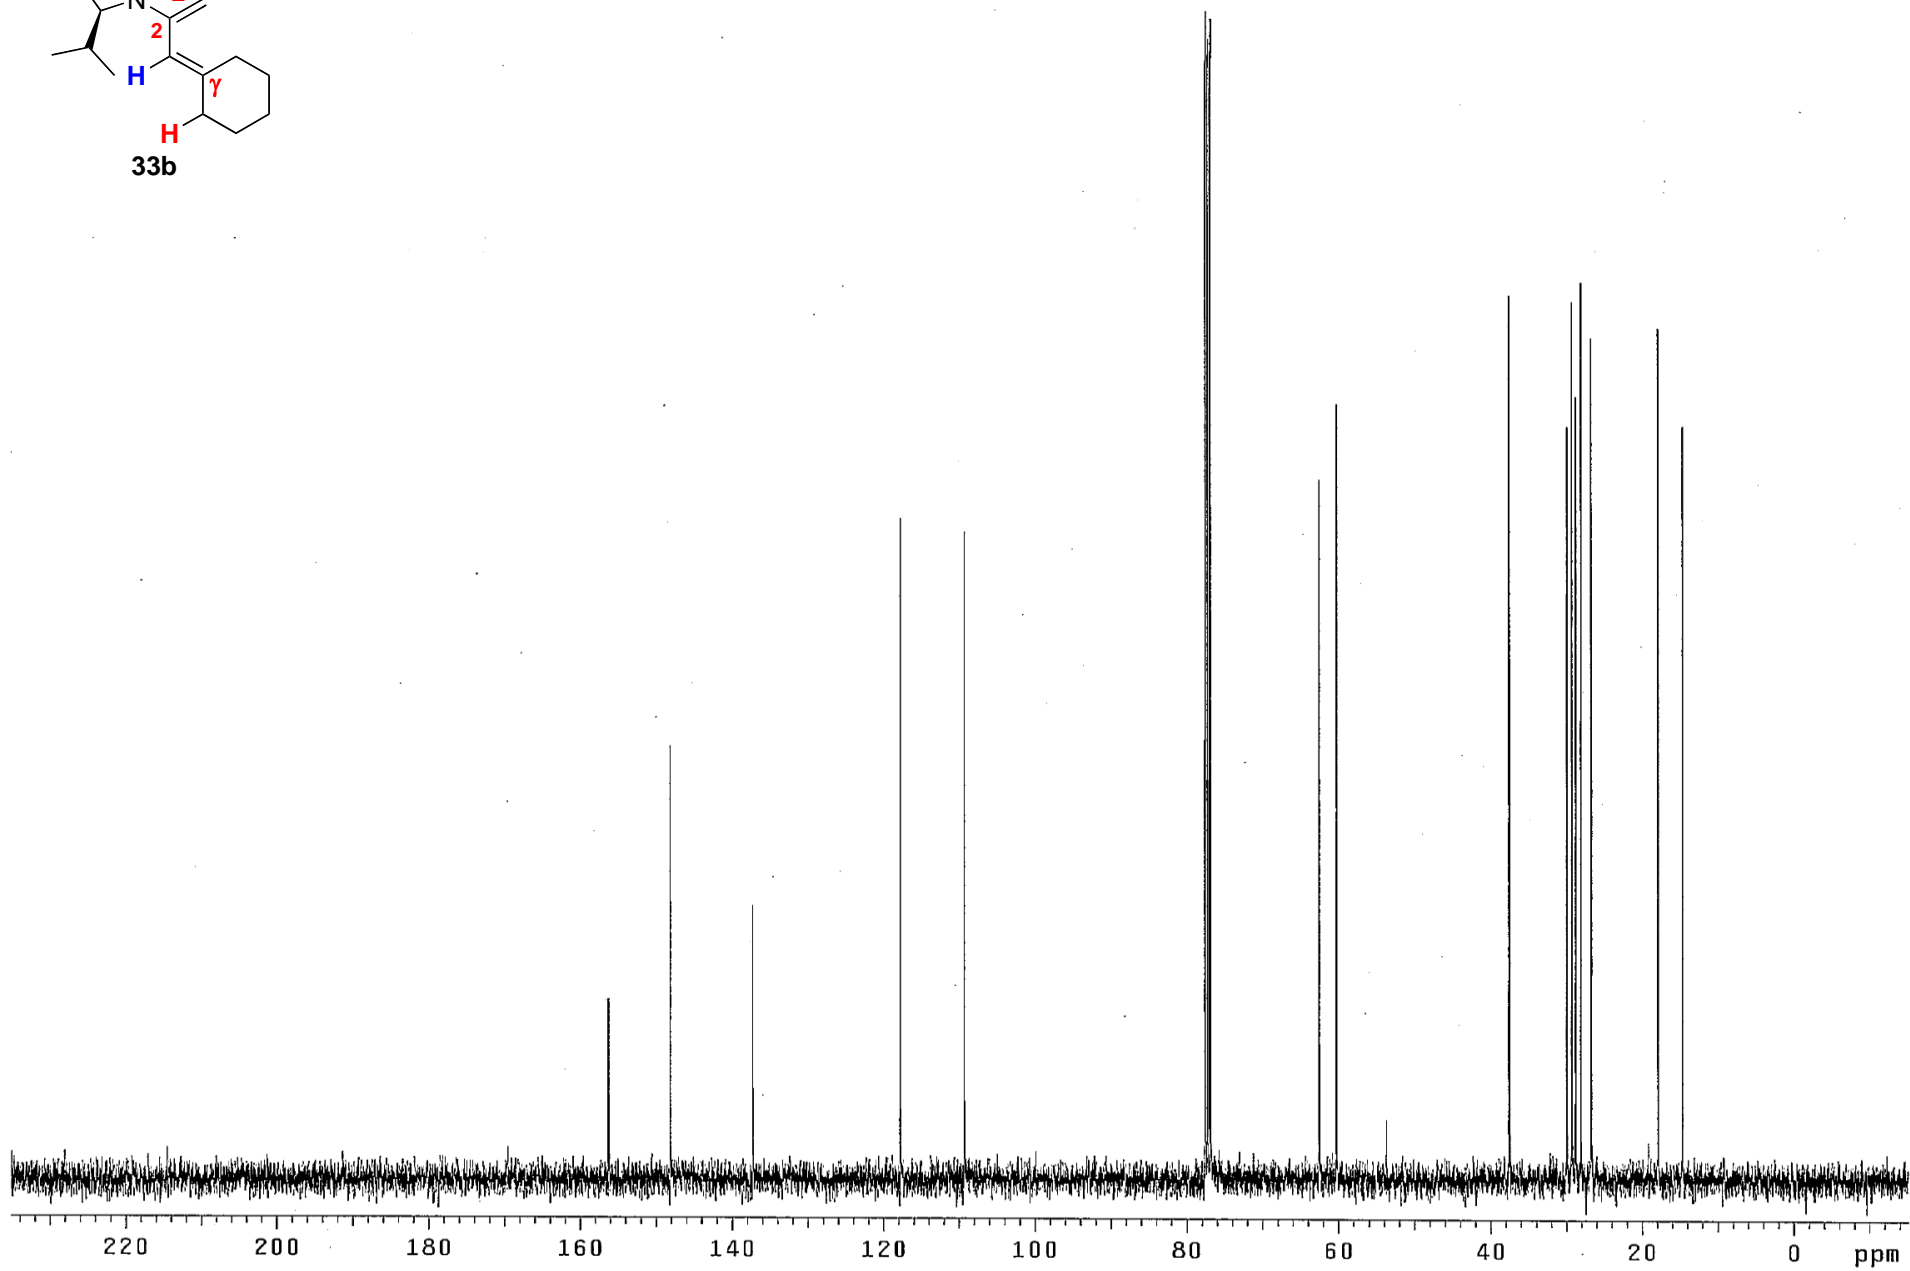

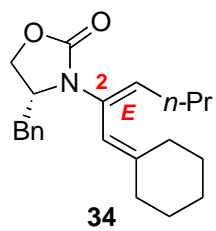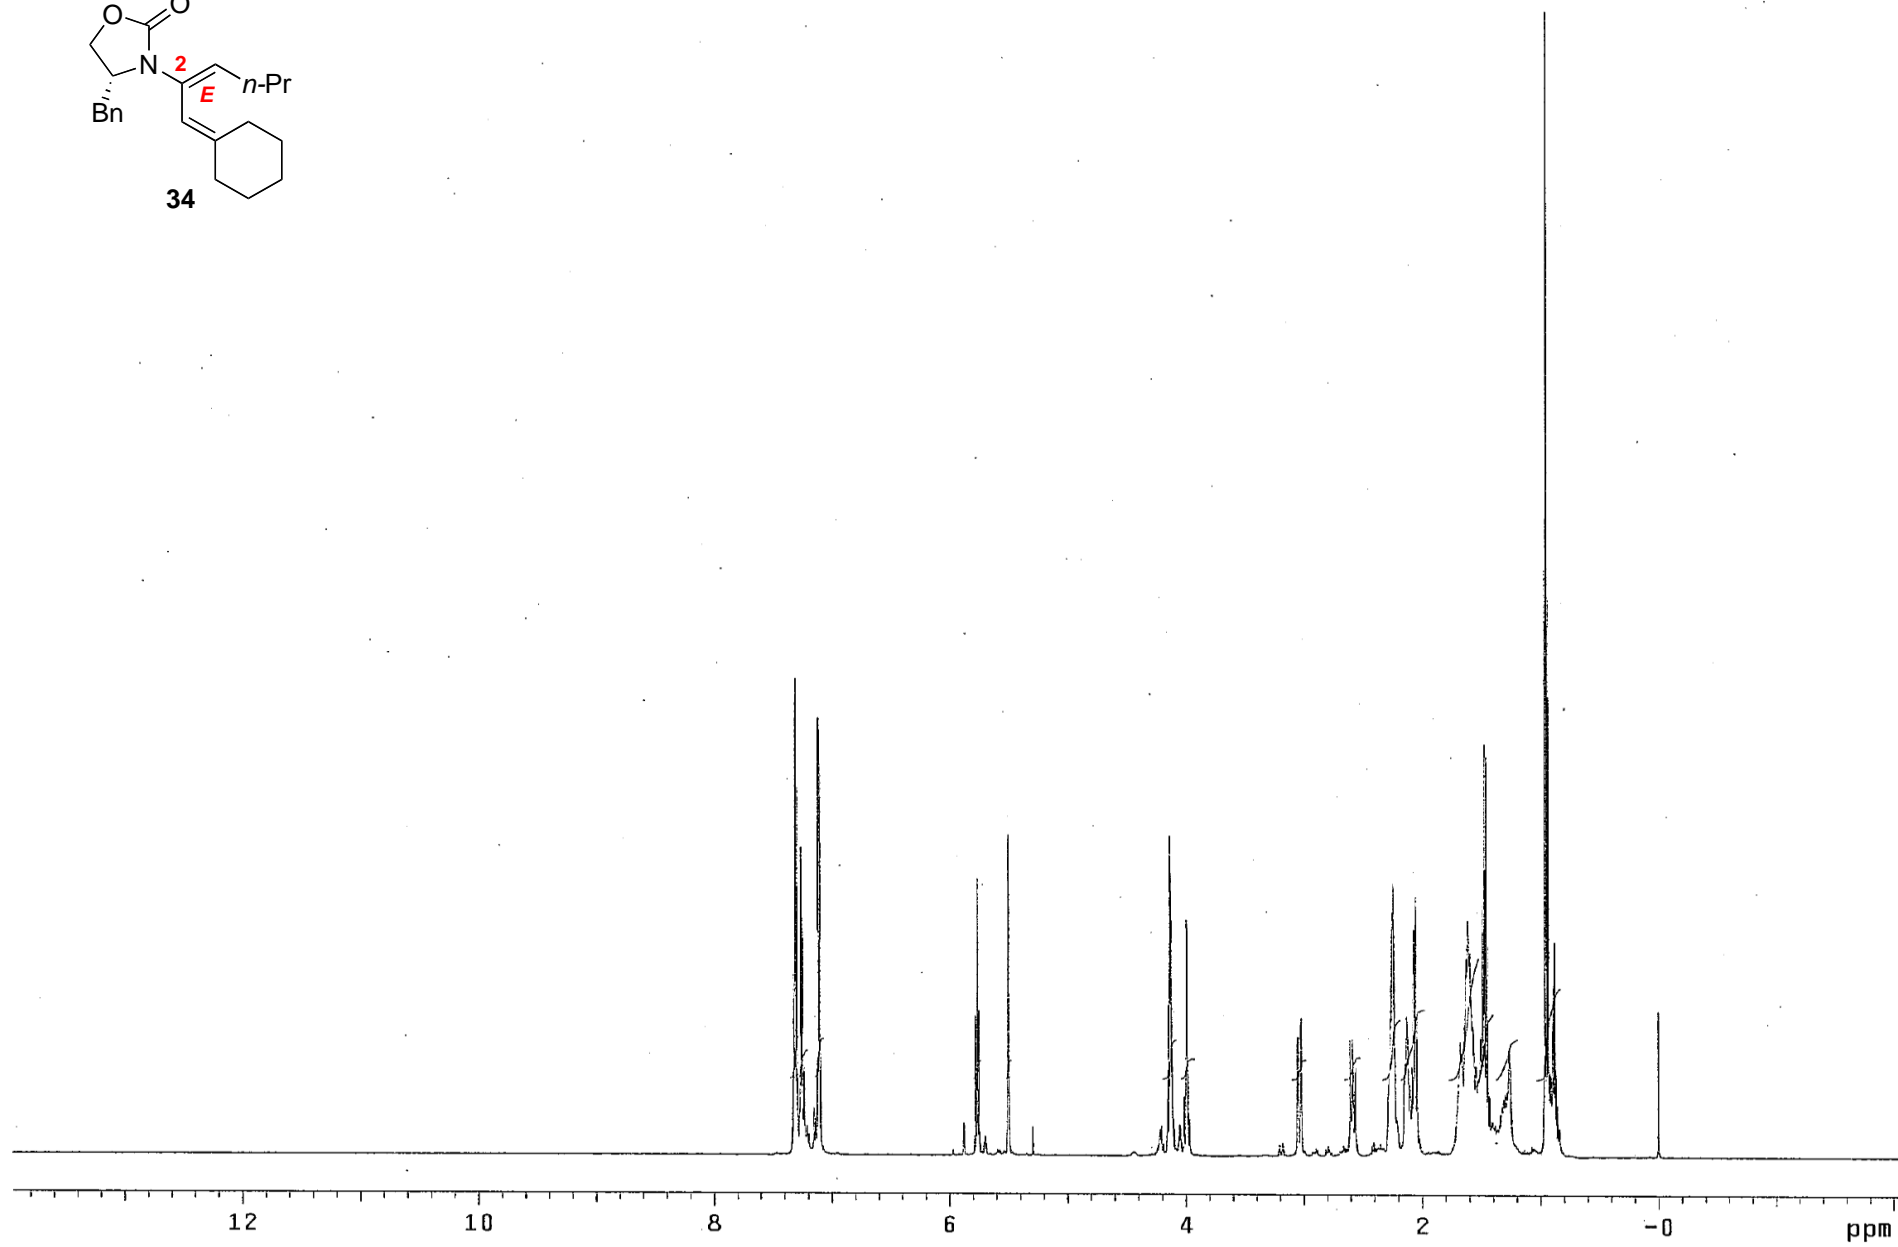

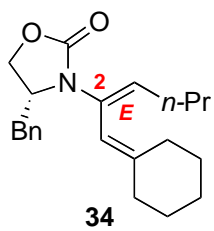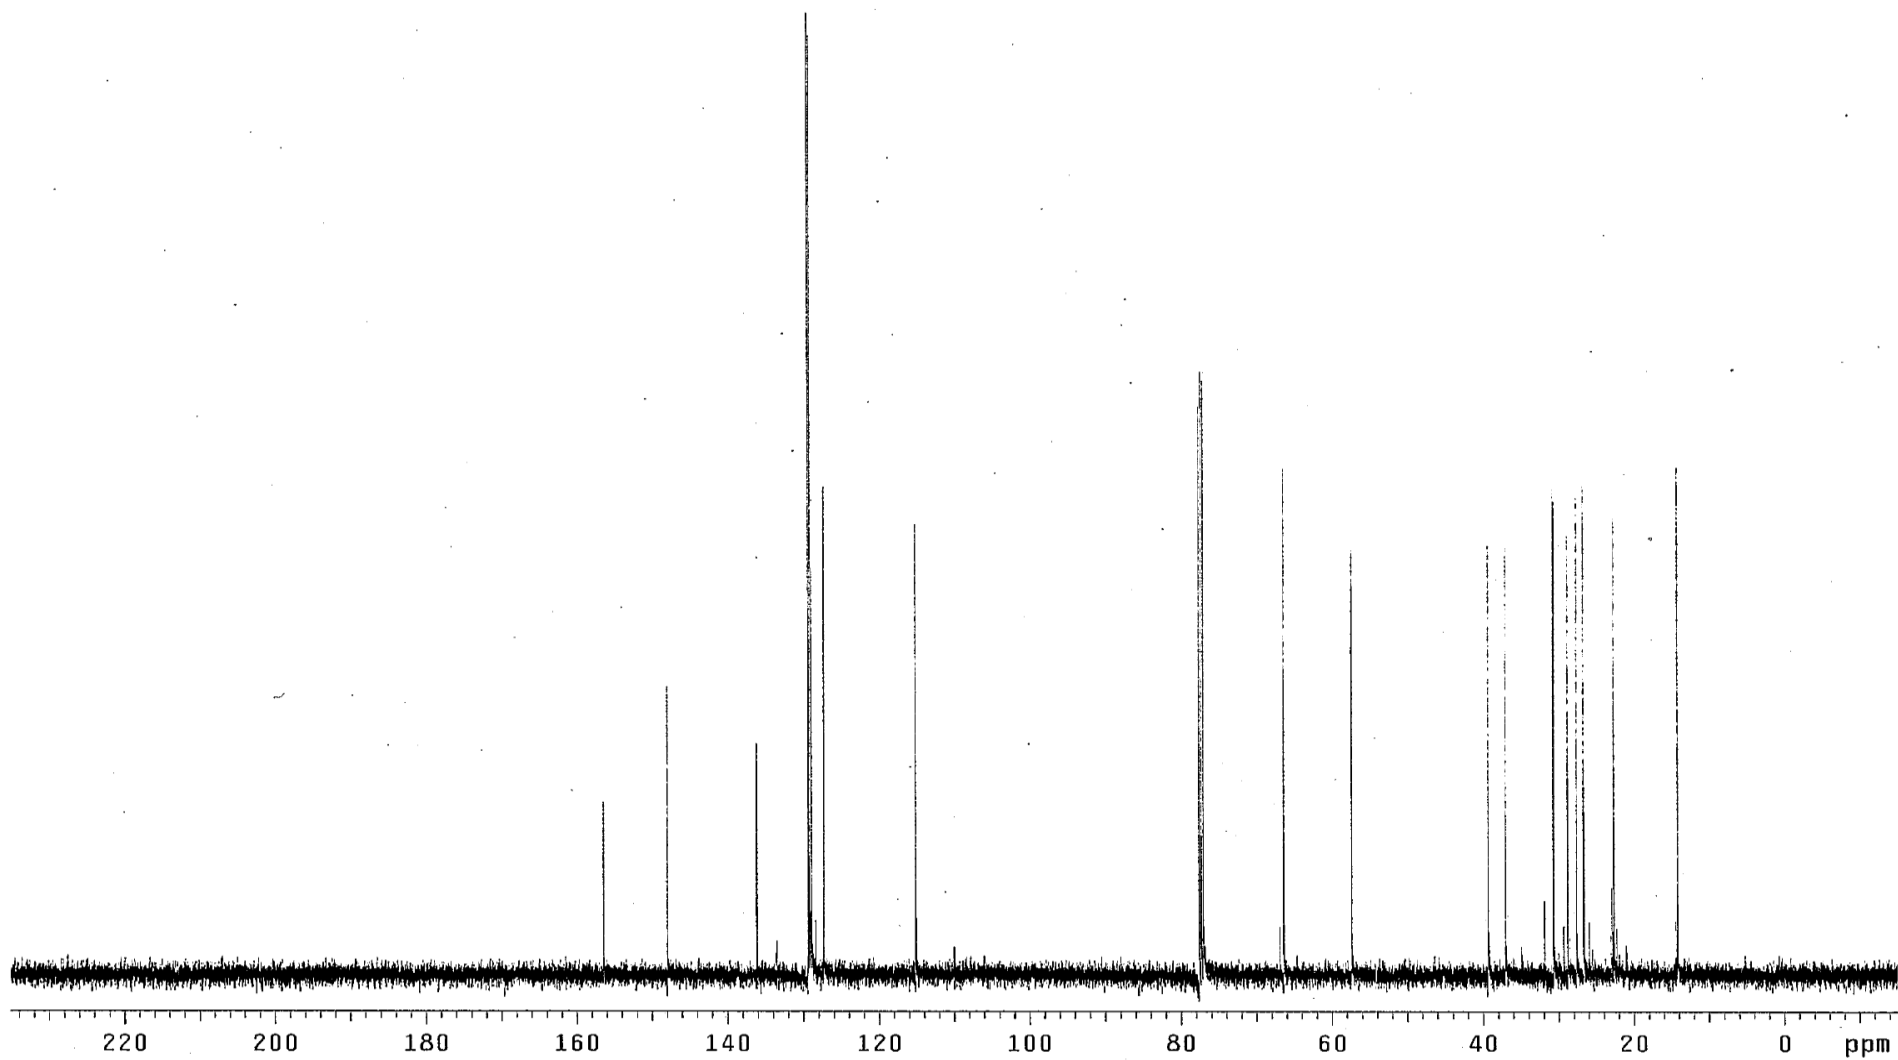



RH-2-140cosy\_28Mar2009

Archive directory: /export/home/ryuji/vnmrsys/data  
Sample directory: RH-2-140cosy\_28Mar2009

Pulse Sequence: gCOSY

Solvent: CDCl3  
Temp. 25.0 C / 298.1 K  
File: gCOSY  
INOVA-500 "nmr03"

Relax. delay 1.000 sec  
Acq. time 0.128 sec  
Width 8000.0 Hz  
2D Width 8000.0 Hz  
Single scan  
128 increments  
OBSERVE H1, 499.7288165 MHz  
DATA PROCESSING  
Sq. sine bell 0.064 sec  
F1 DATA PROCESSING  
Sq. sine bell 0.016 sec  
FT size 2048 x 2048  
Total time 2 min, 45 sec

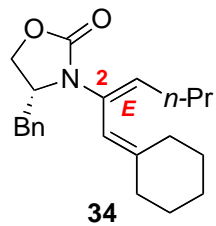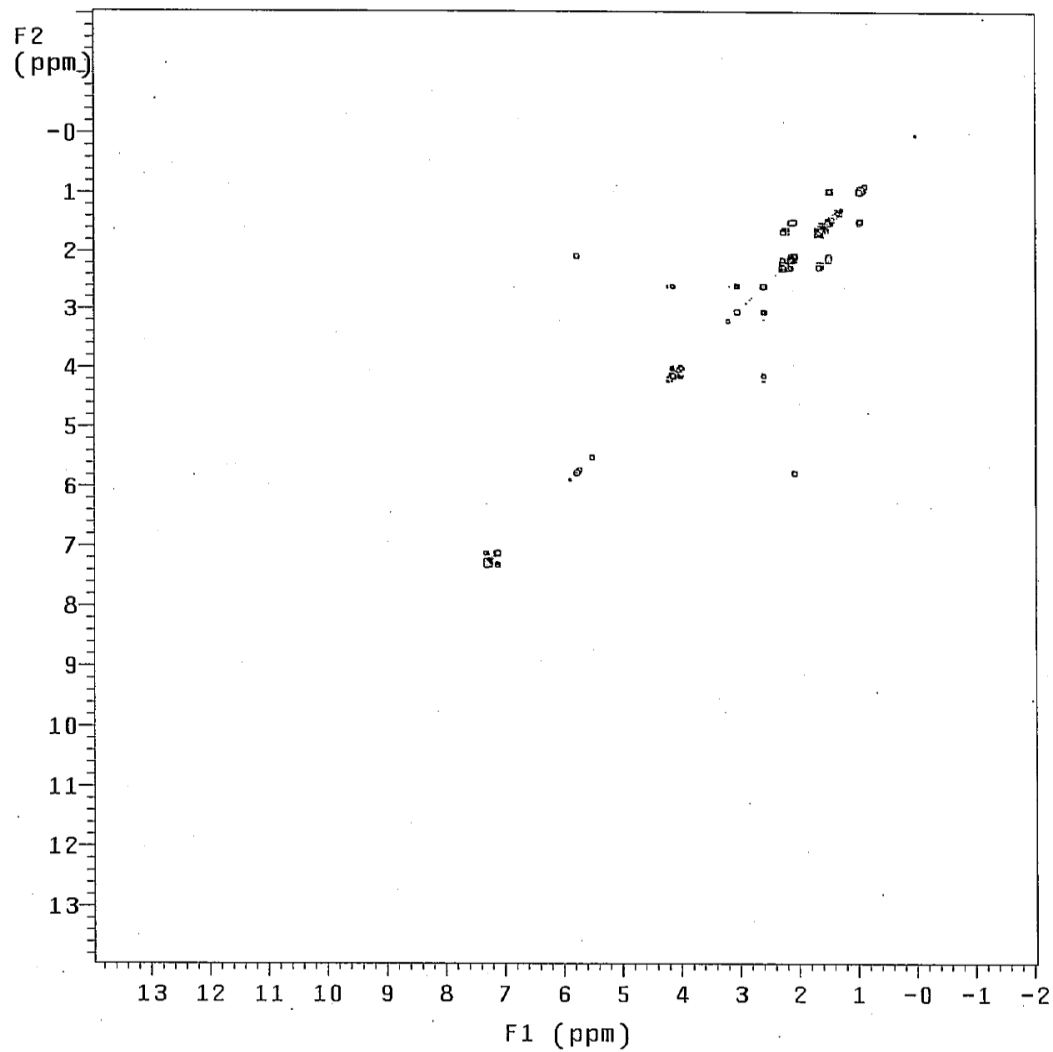

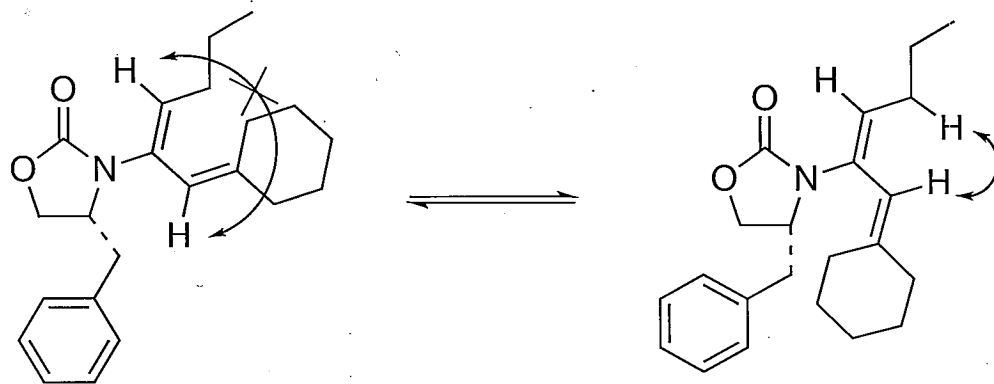

**The Key nOe for the 2-Amido-Diene**

RH-2-140NOESY\_29Mar2009

Archive directory: /export/home/ryuji/vnmrsys/data  
Sample directory: RH-2-140NOESY\_29Mar2009

Pulse Sequence: NOESY

Solvent: CDCl3  
Temp. 25.0 C / 298.1 K  
File: NOESY  
INOVA-500 "nmr03"

Relax. delay 1.000 sec  
Mixing 0.200 sec  
Acq. time 0.160 sec  
Width 6387.7 Hz  
2D Width 6387.7 Hz  
4 repetitions  
2 x 128 increments  
OBSERVE H1, 399.7865261 MHz  
DATA PROCESSING  
Gauss apodization 0.074 sec  
F1 DATA PROCESSING  
Gauss apodization 0.018 sec  
FT size 2048 x 2048  
Total time 24 min, 21 sec

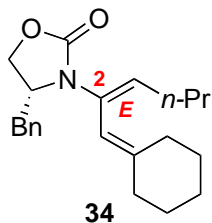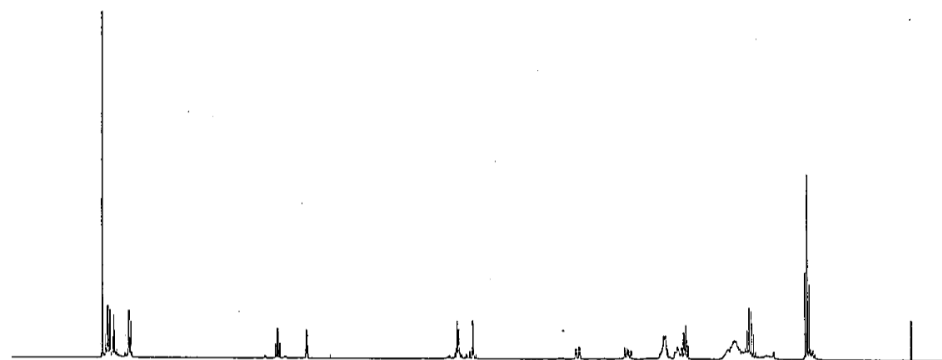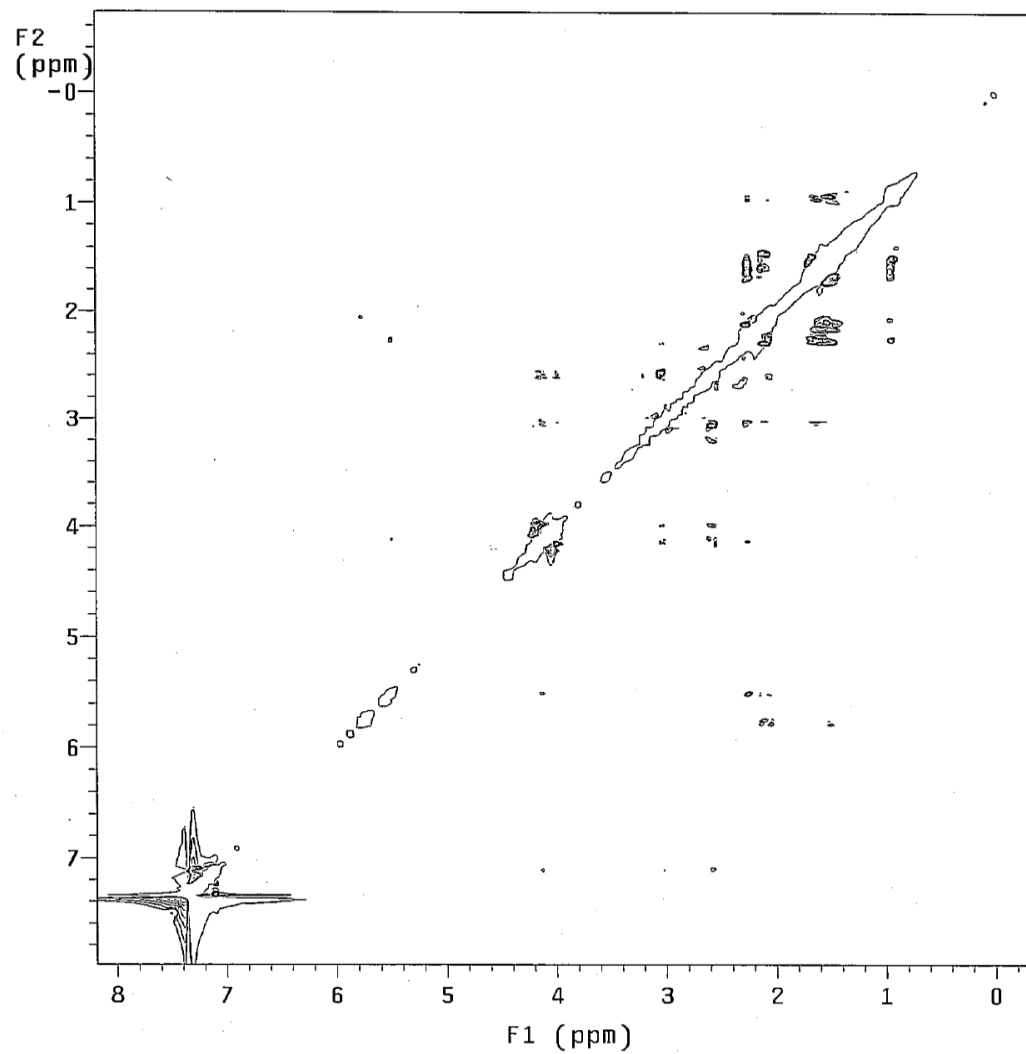

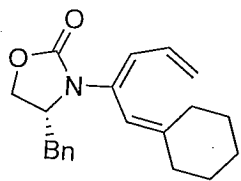

35a

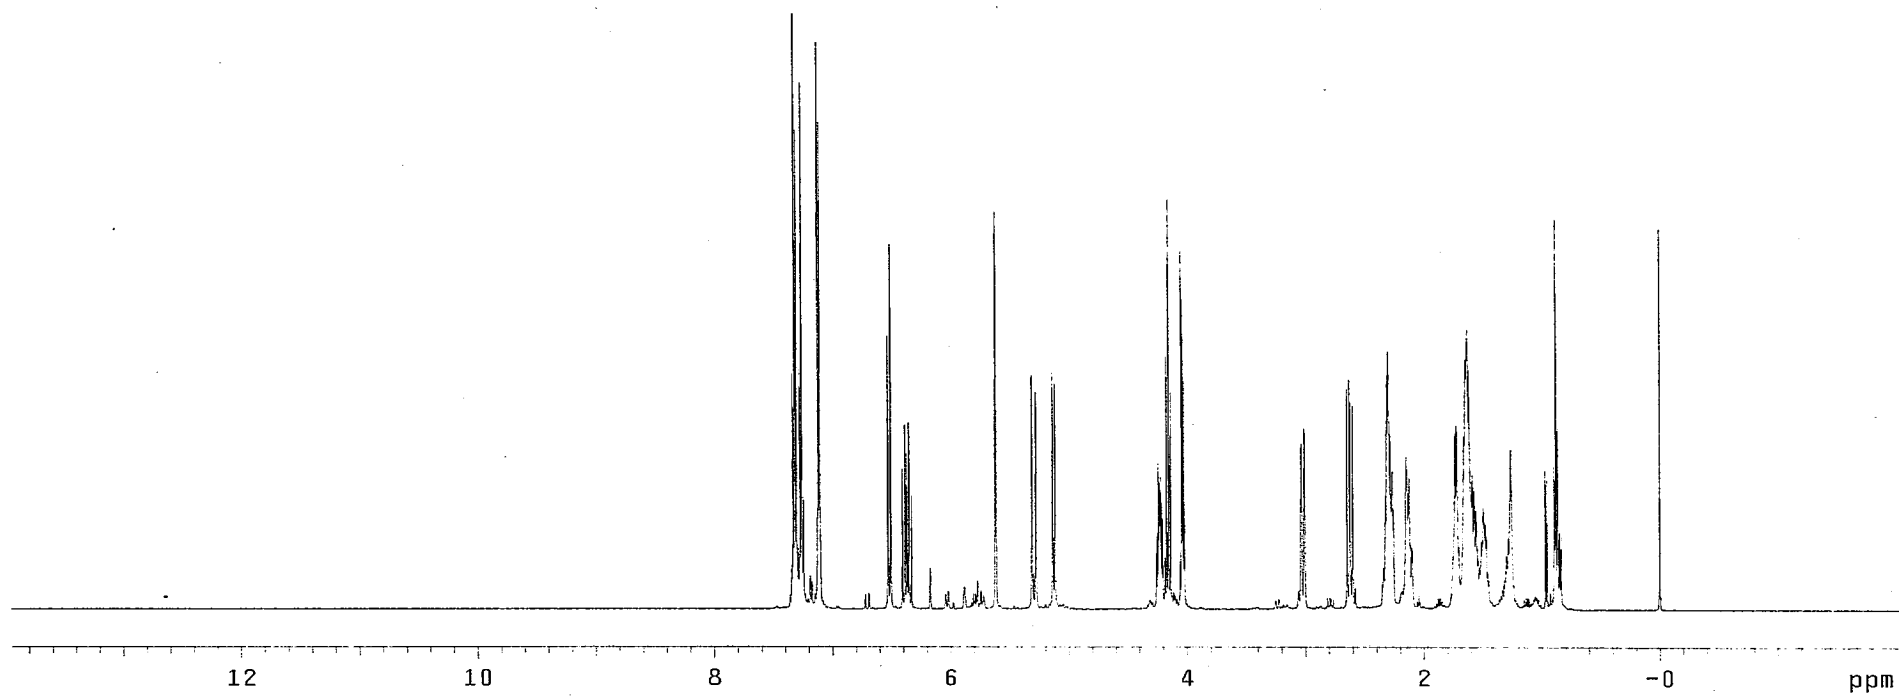

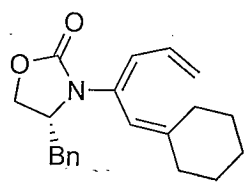

35a

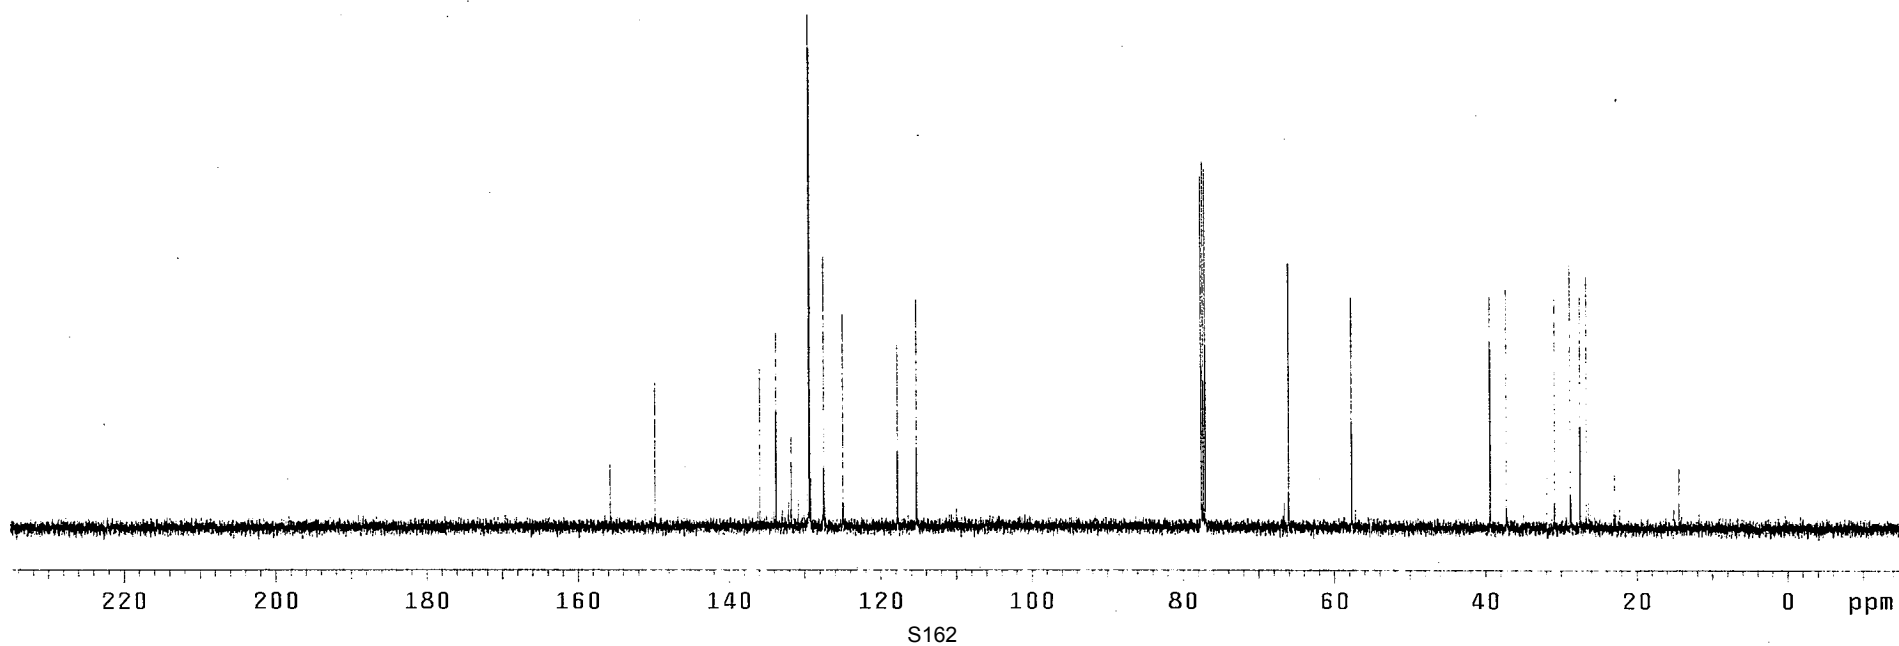

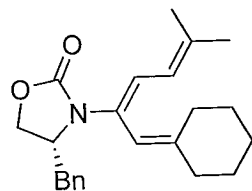

35b

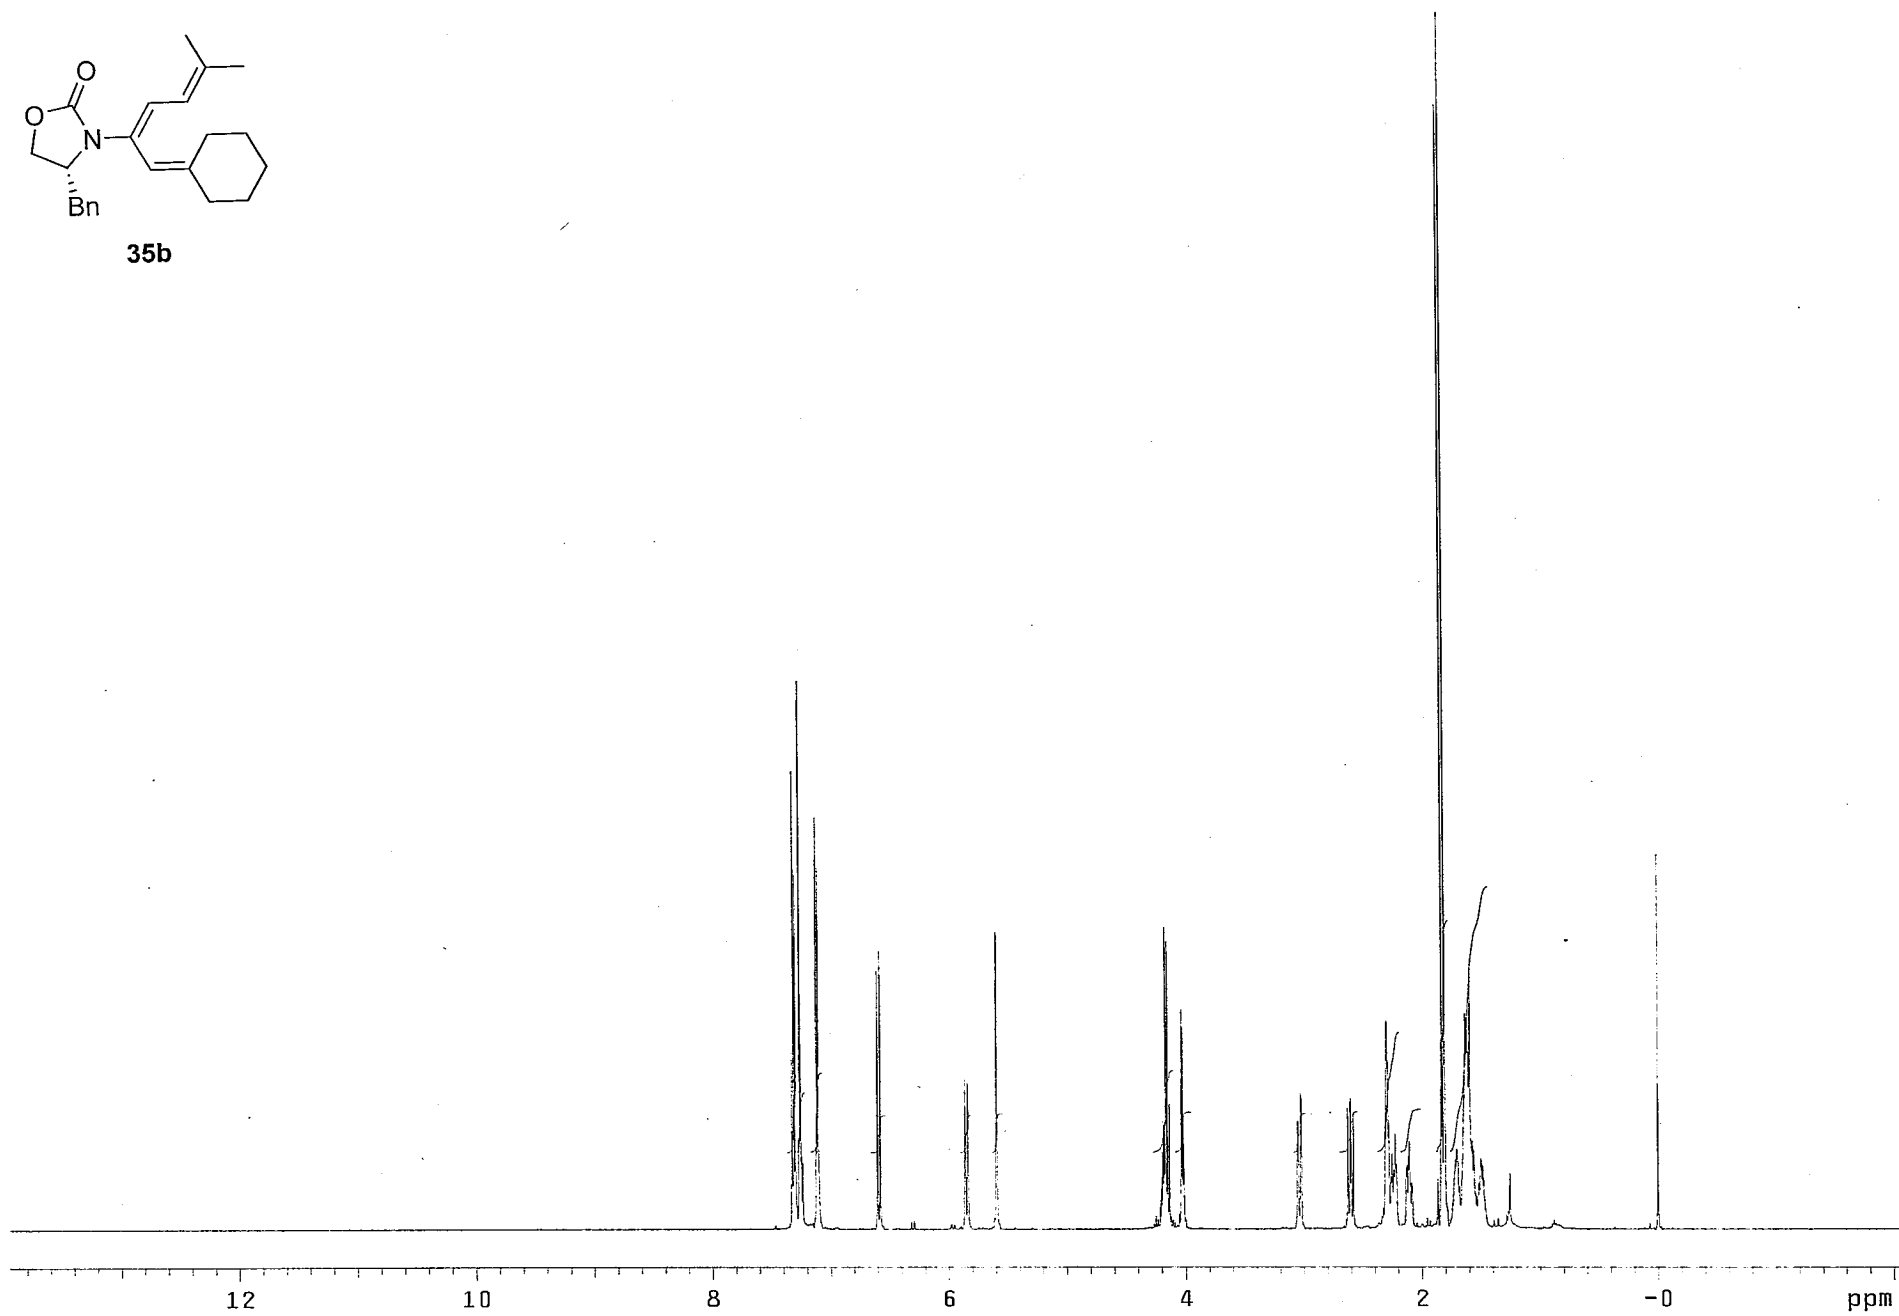

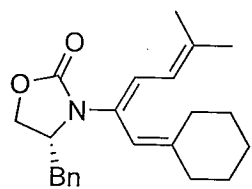

35b

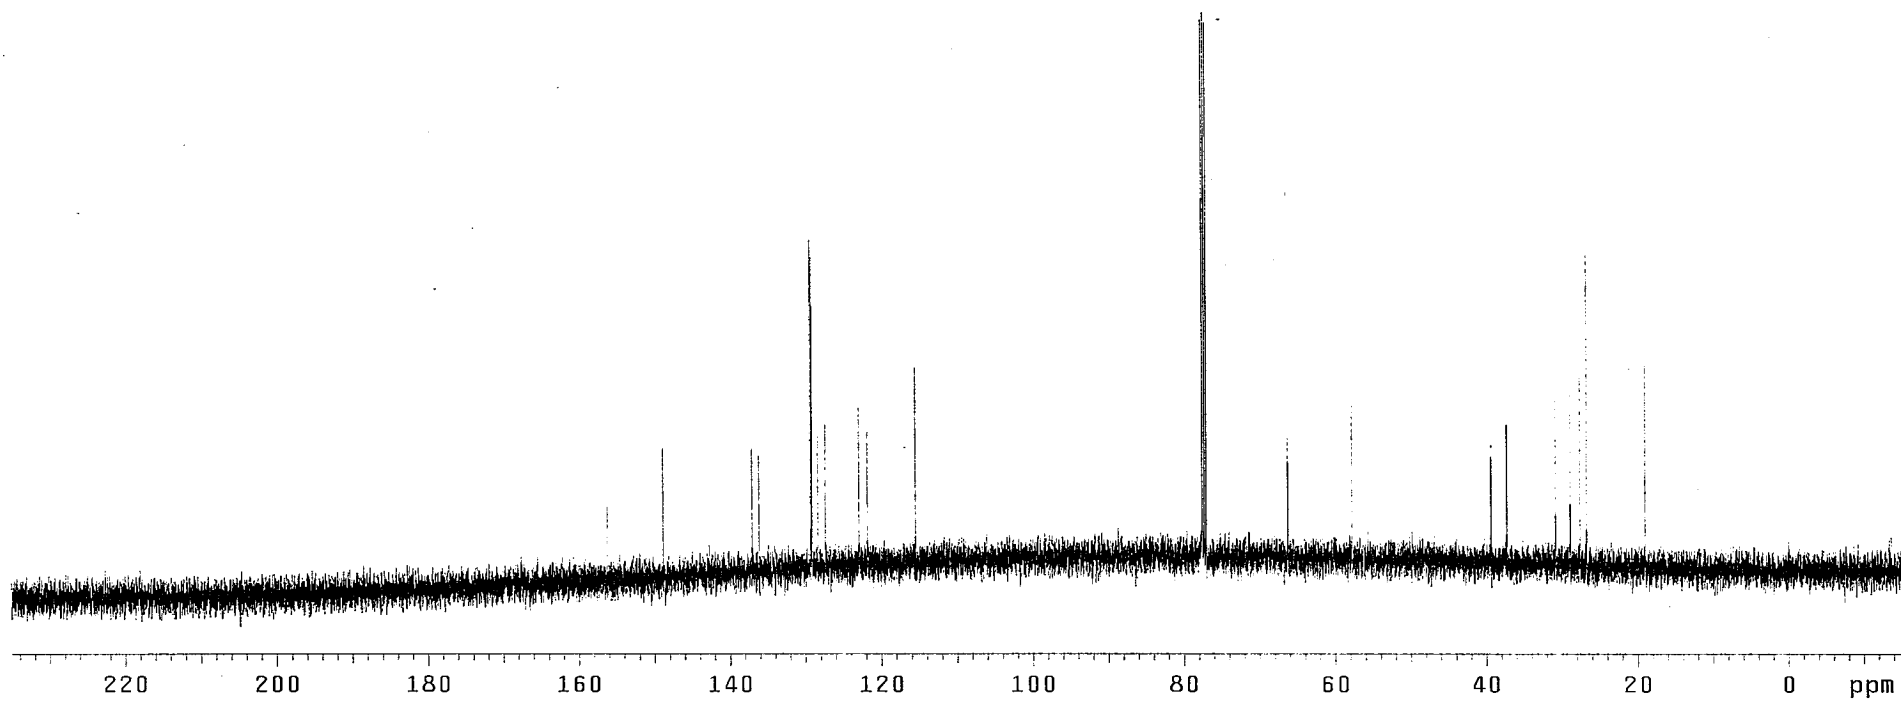

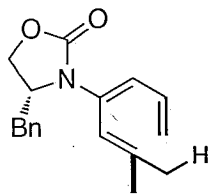

36

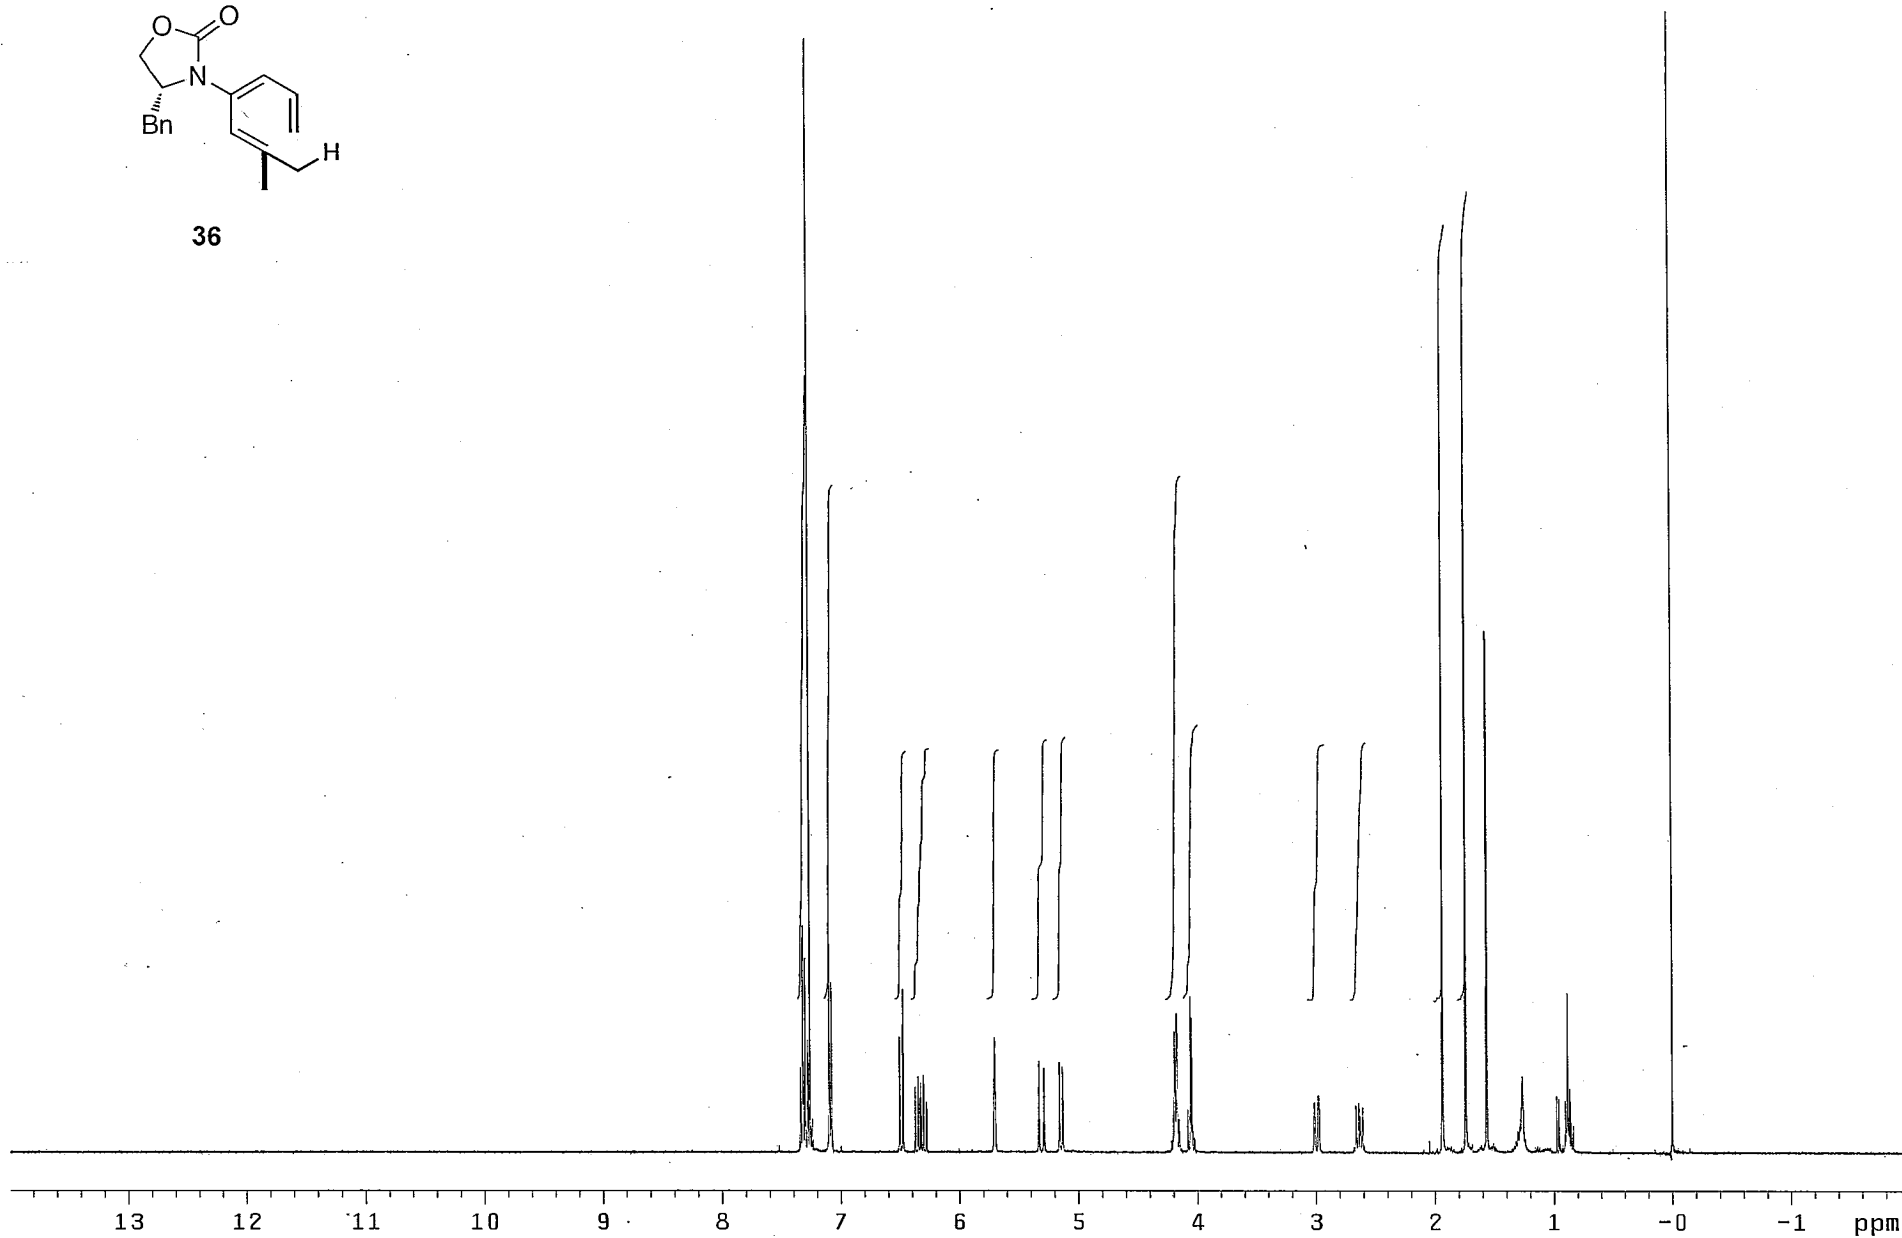



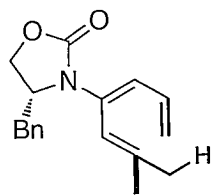

36

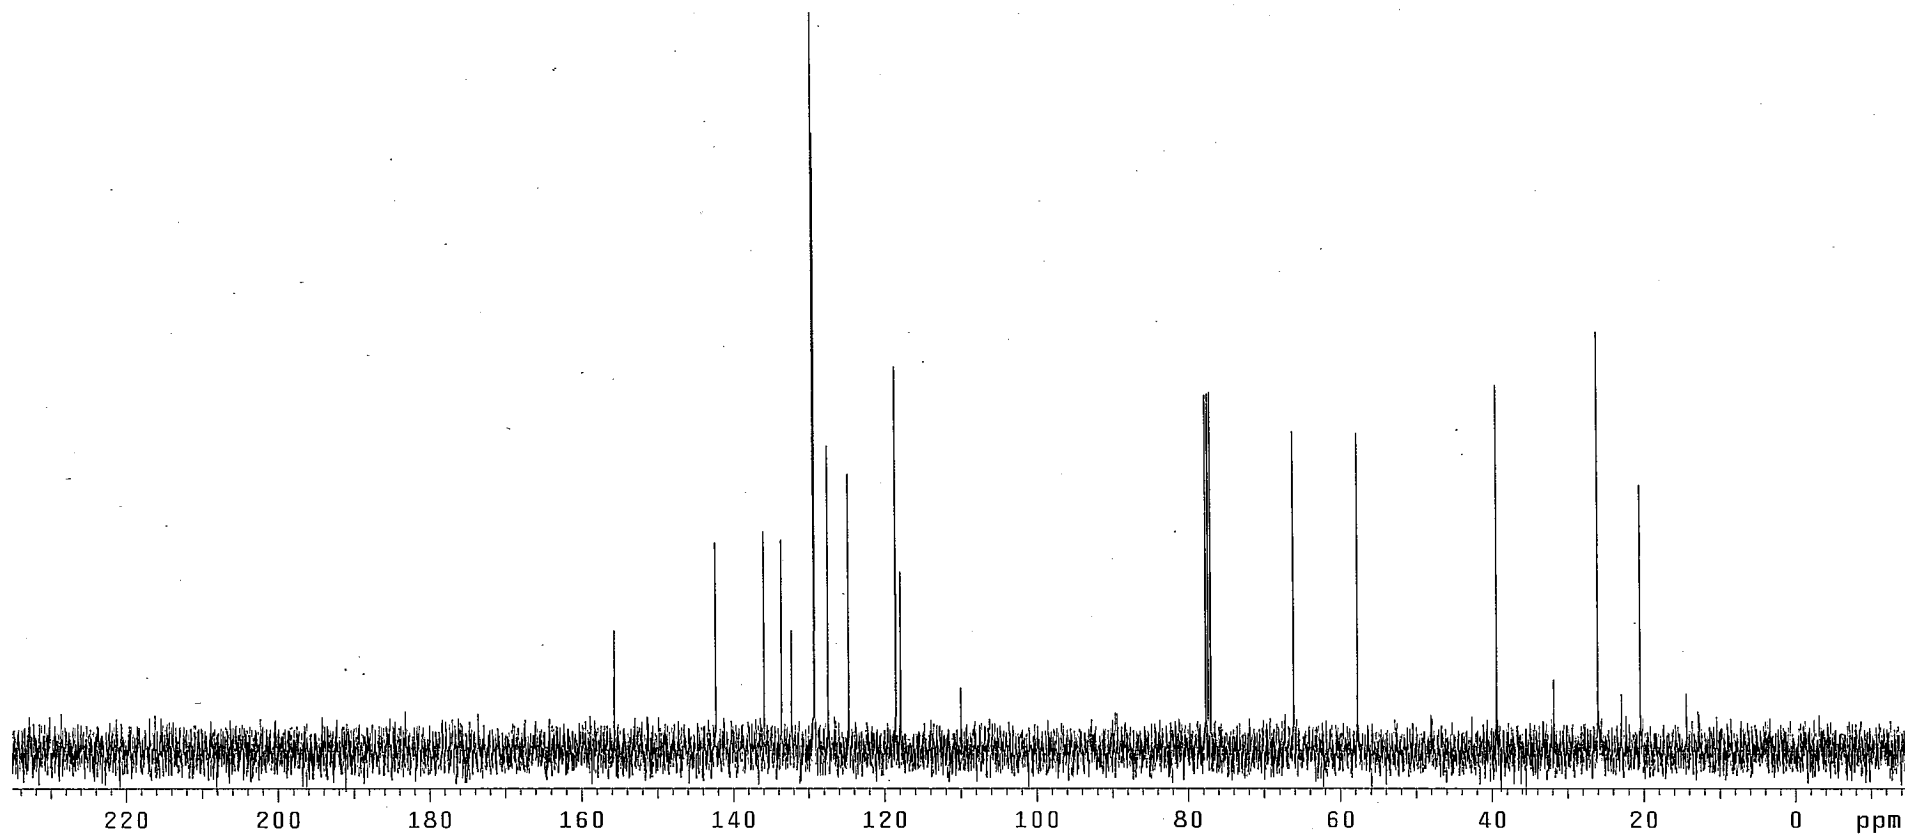

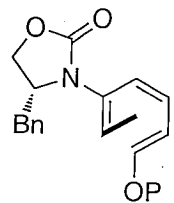

39a: P = TBDPS

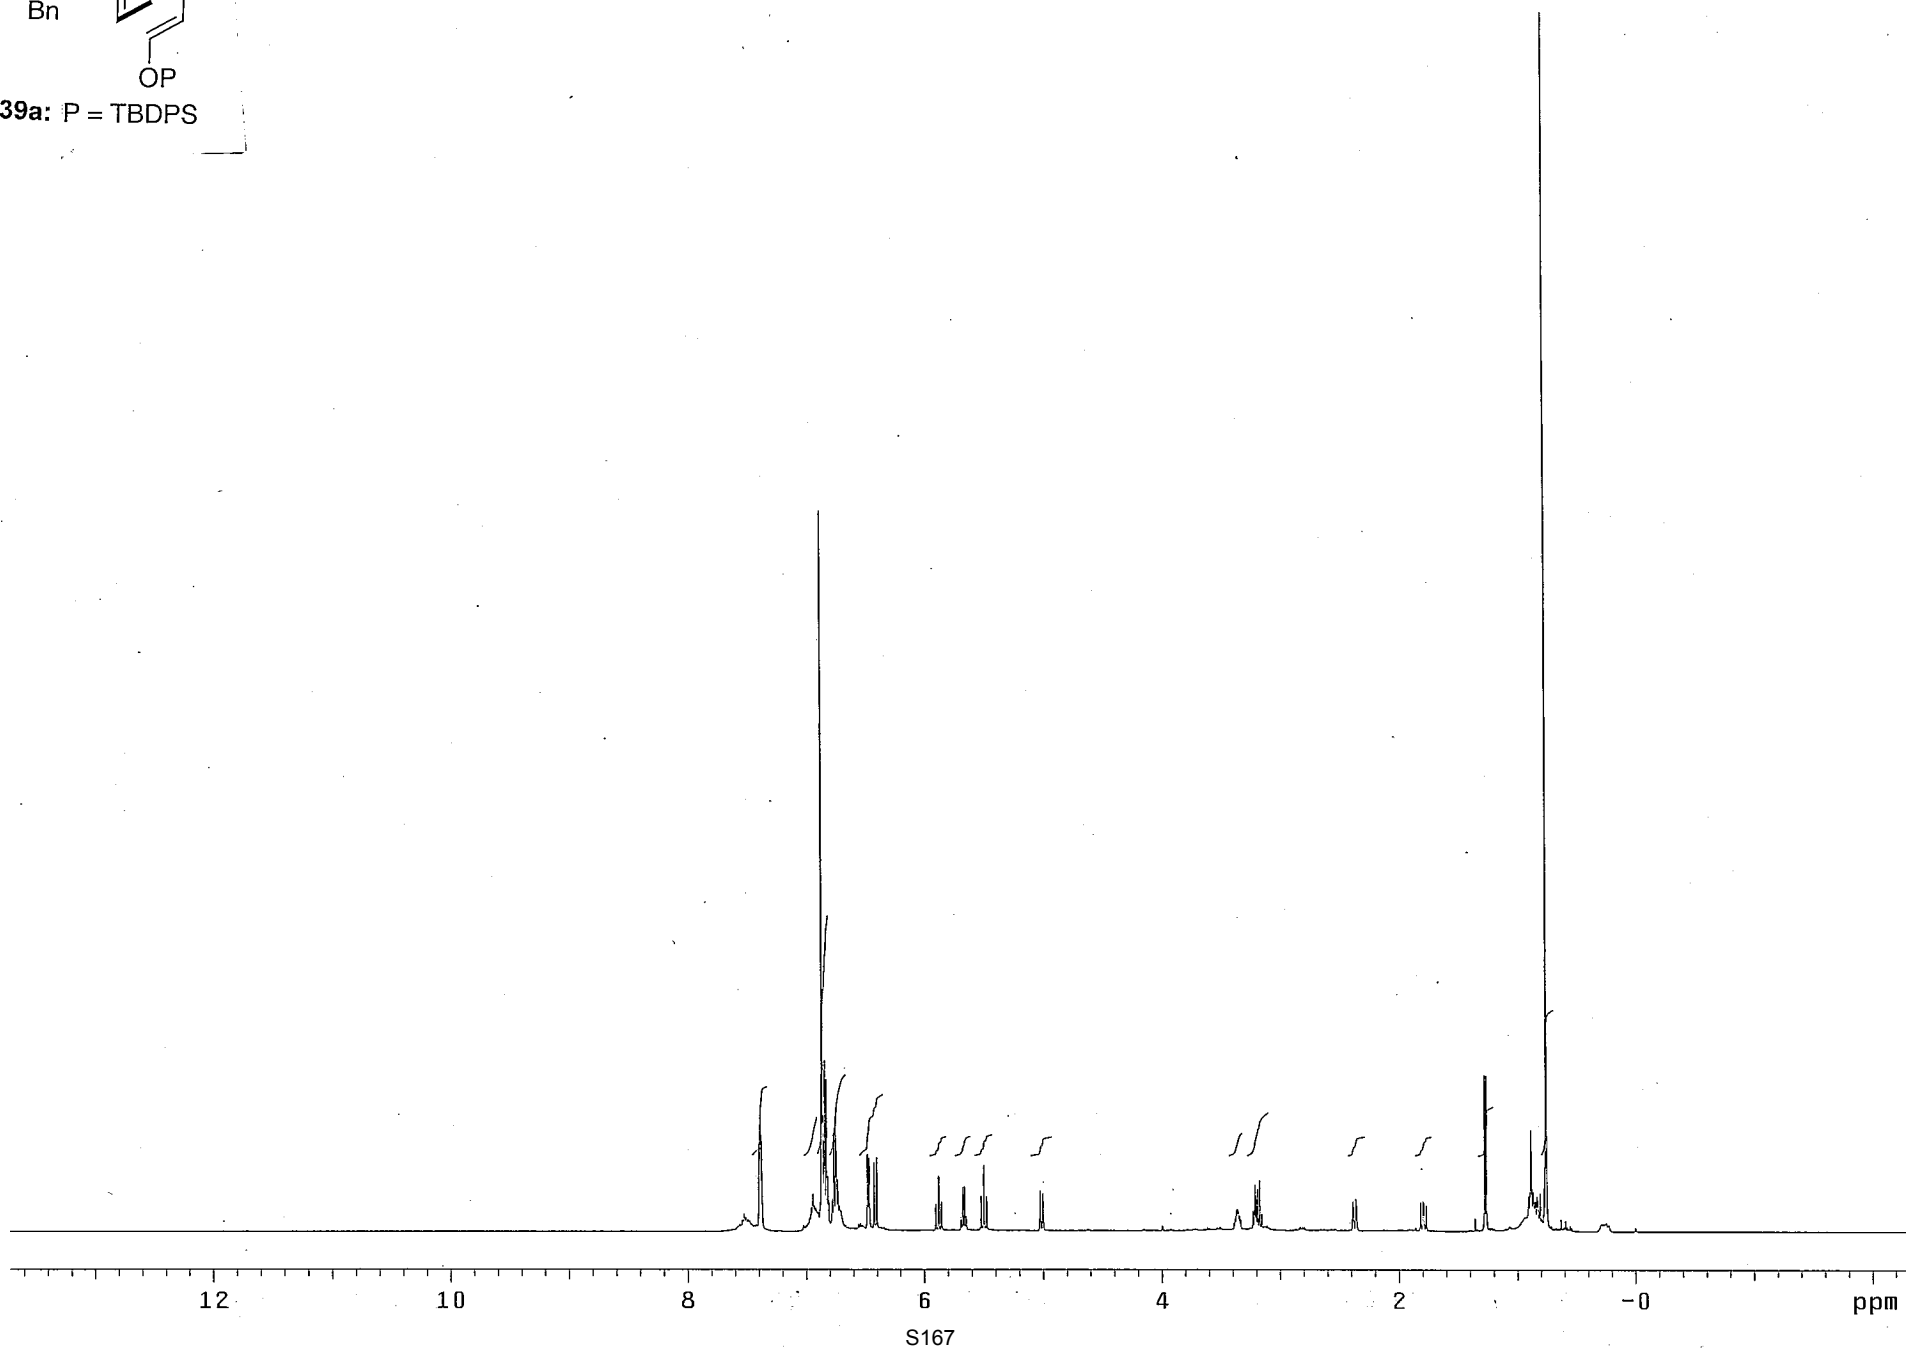

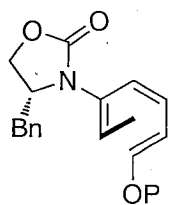

39a: P = TBDPS

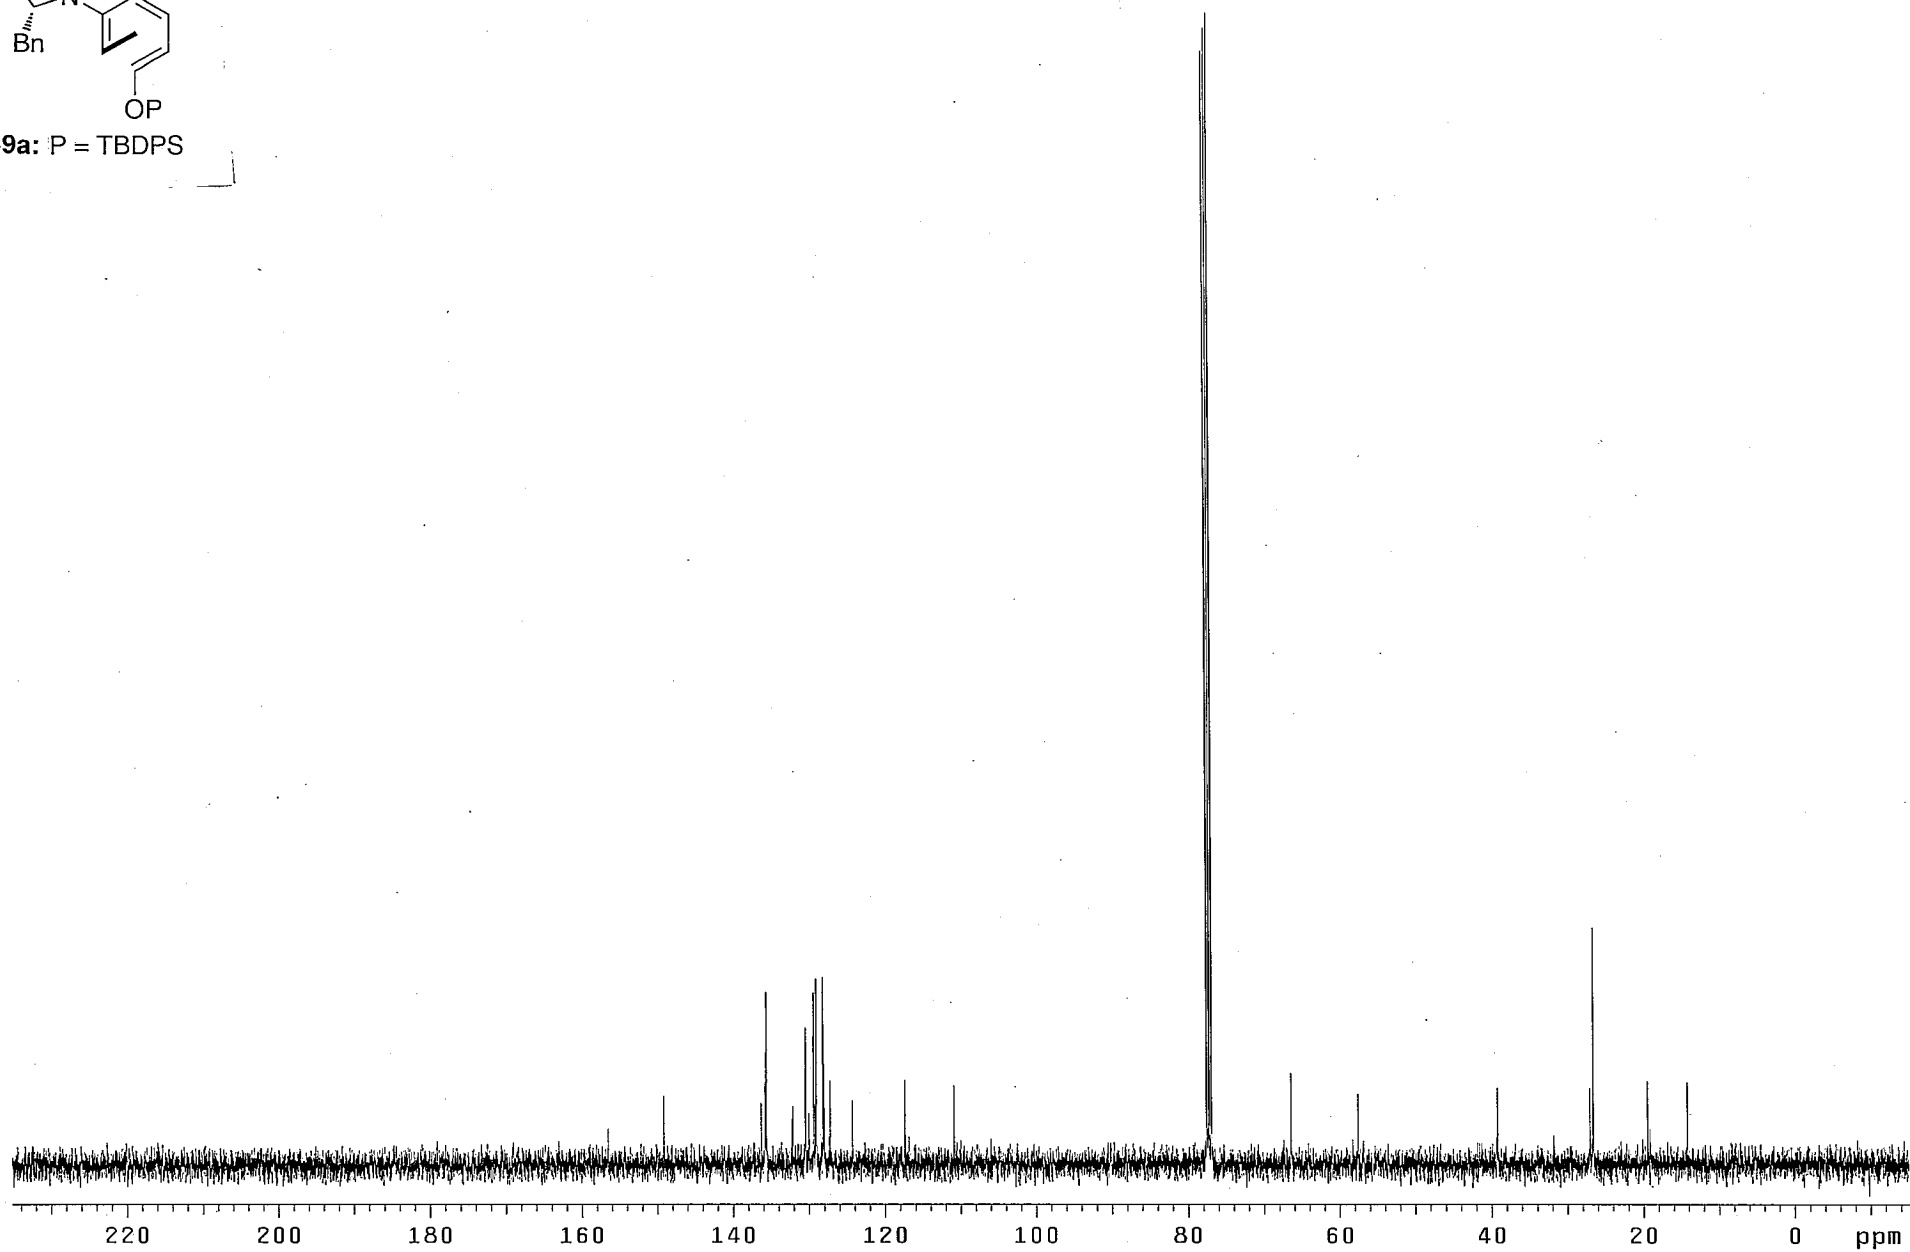

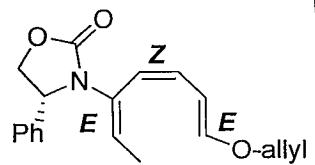

39b

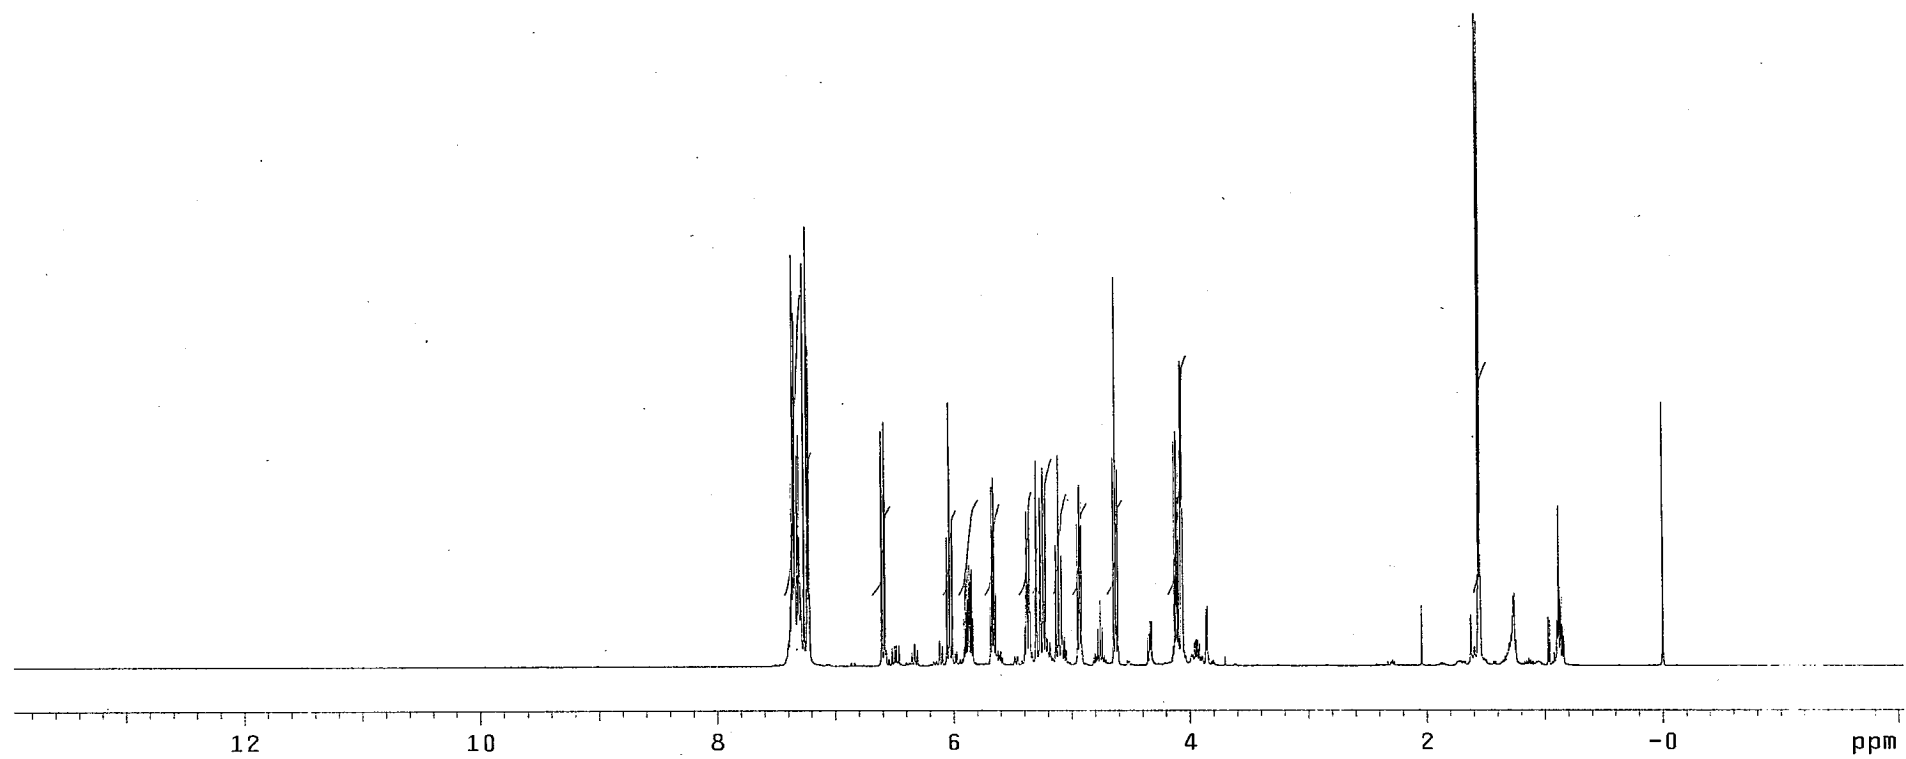

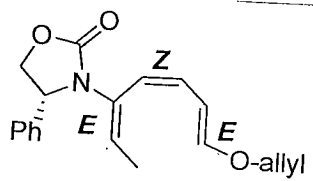

39b

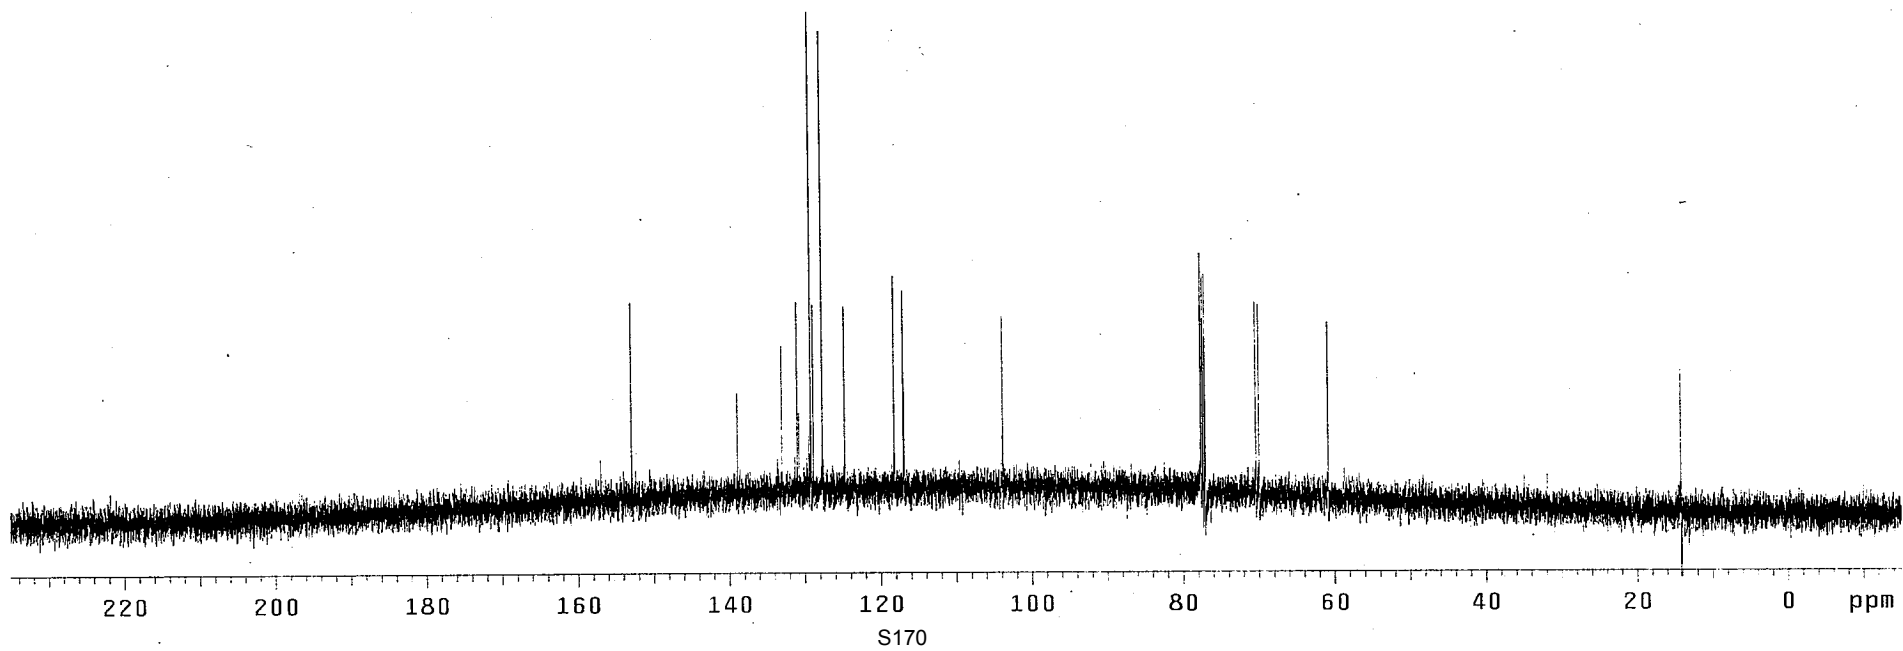

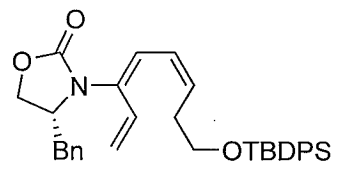

41

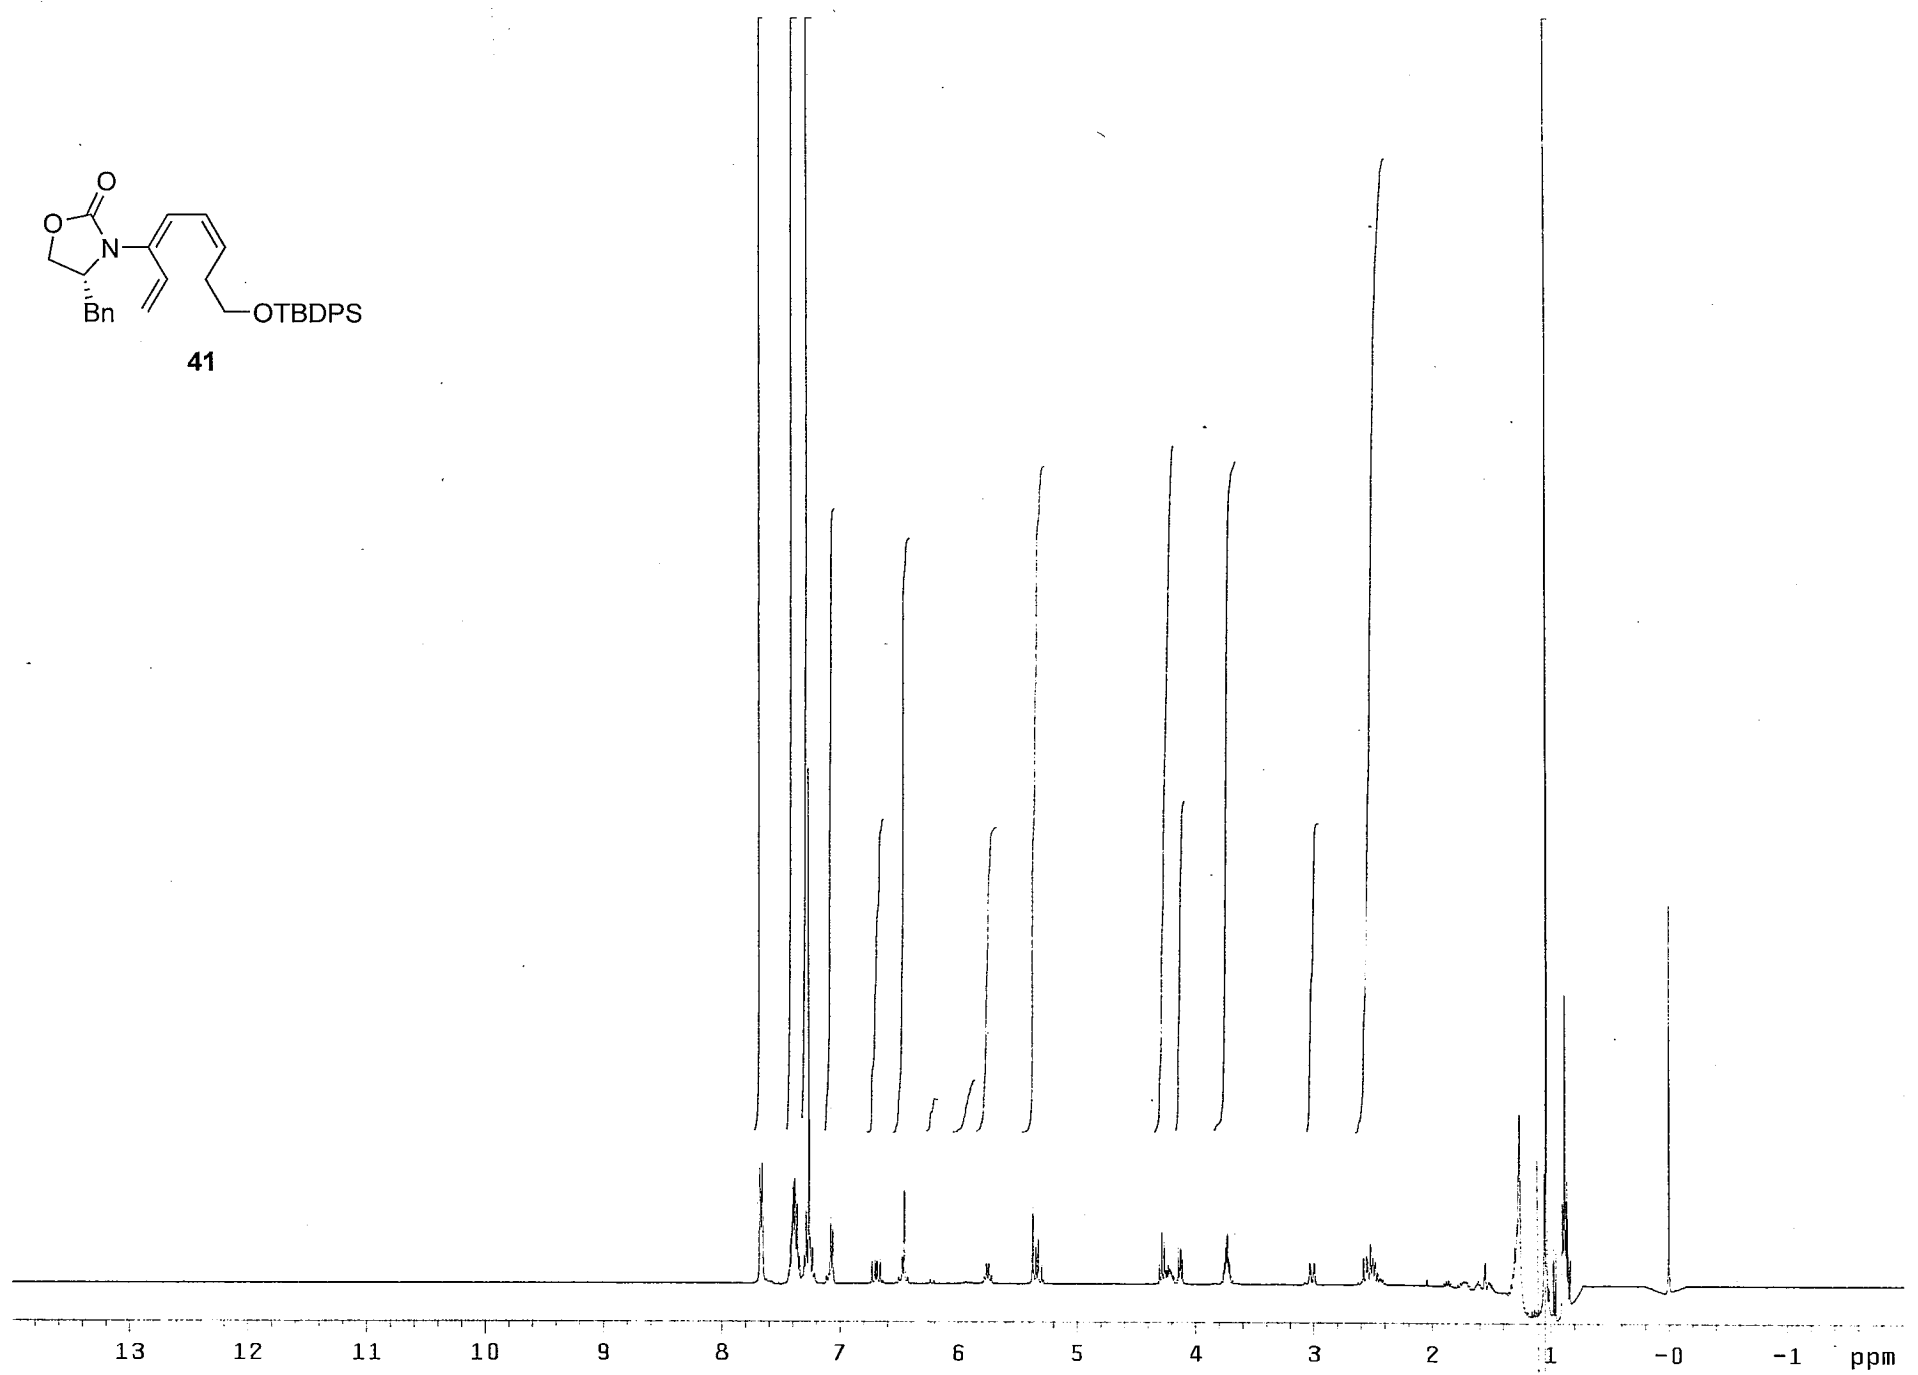

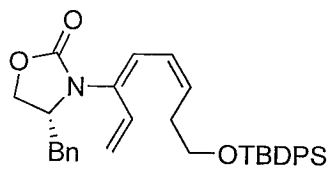

41

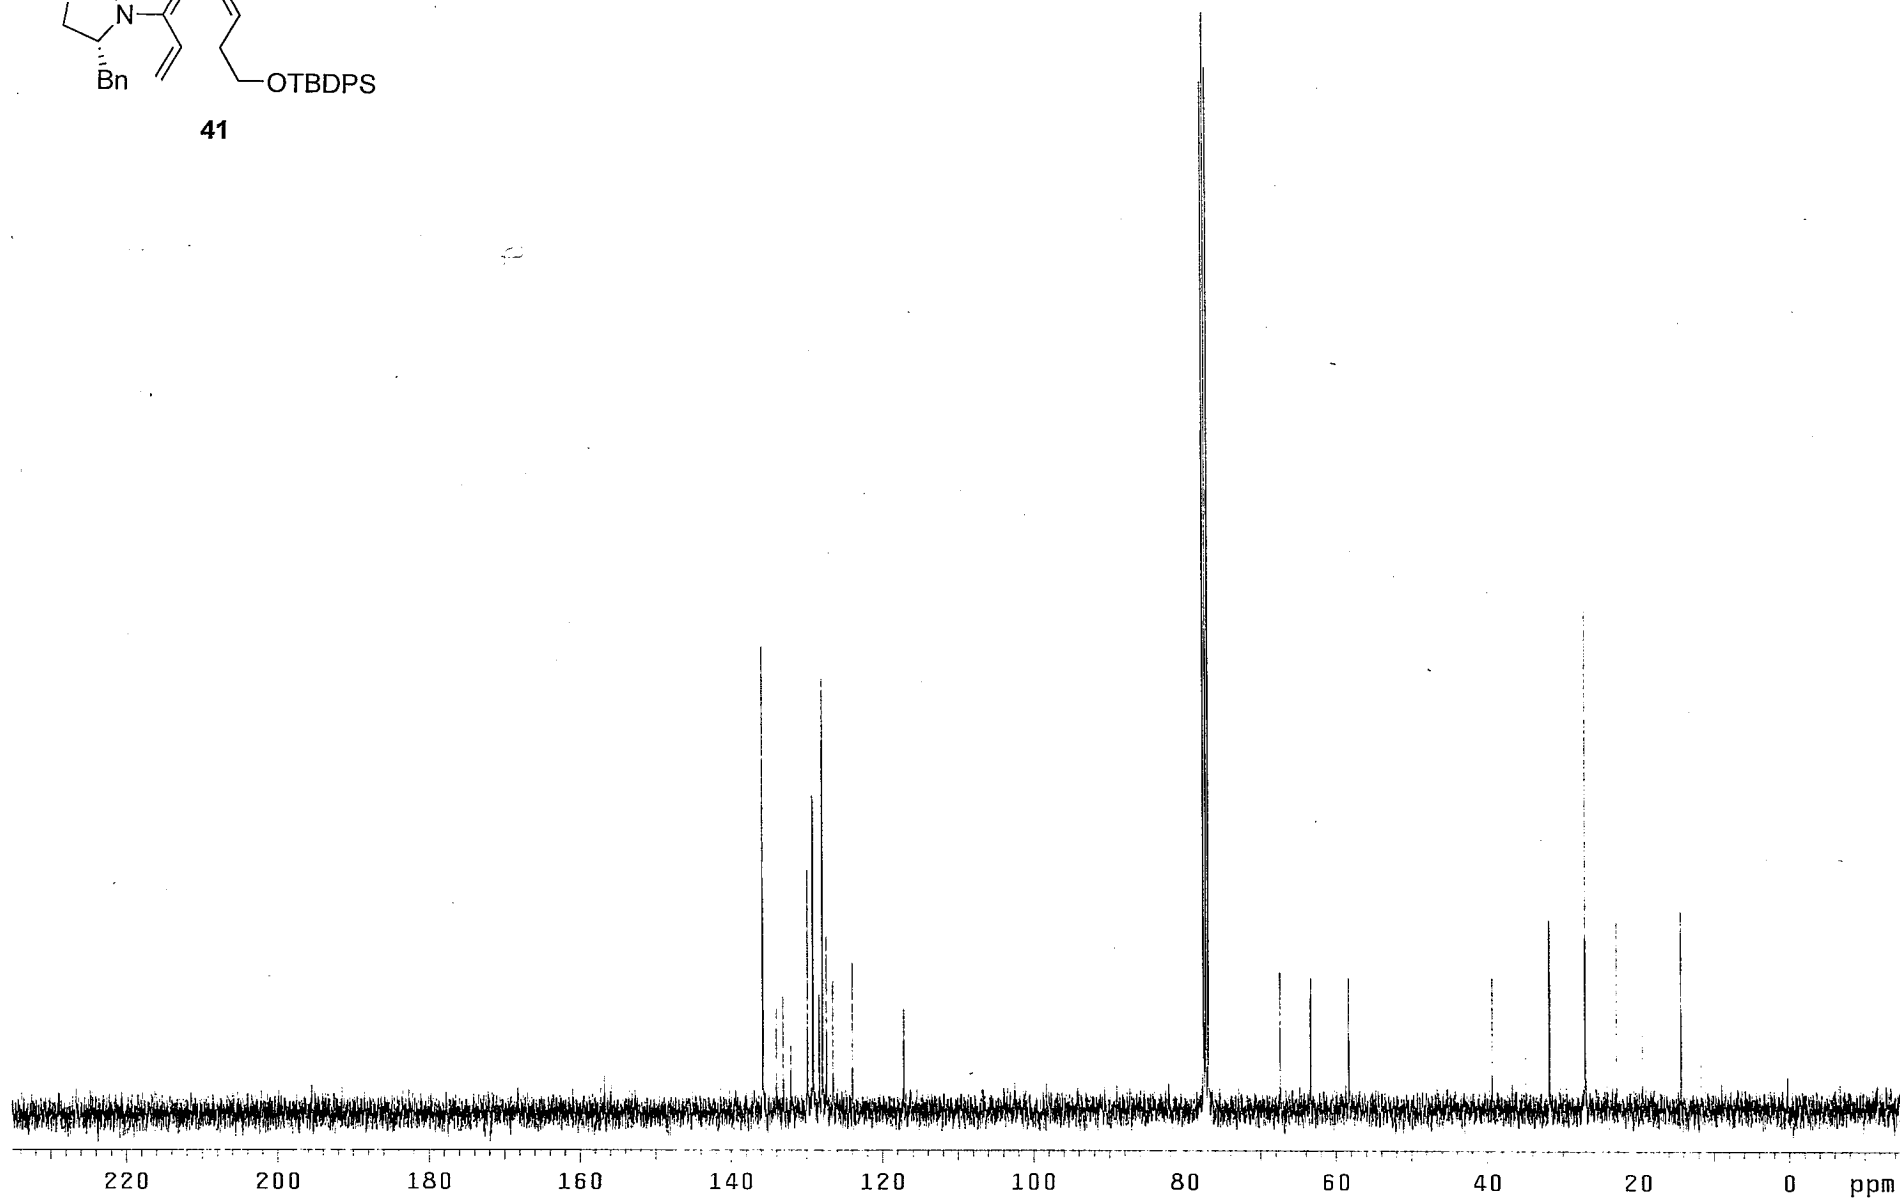

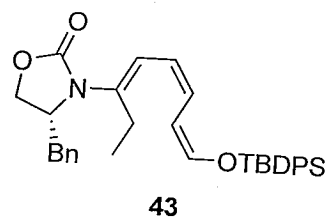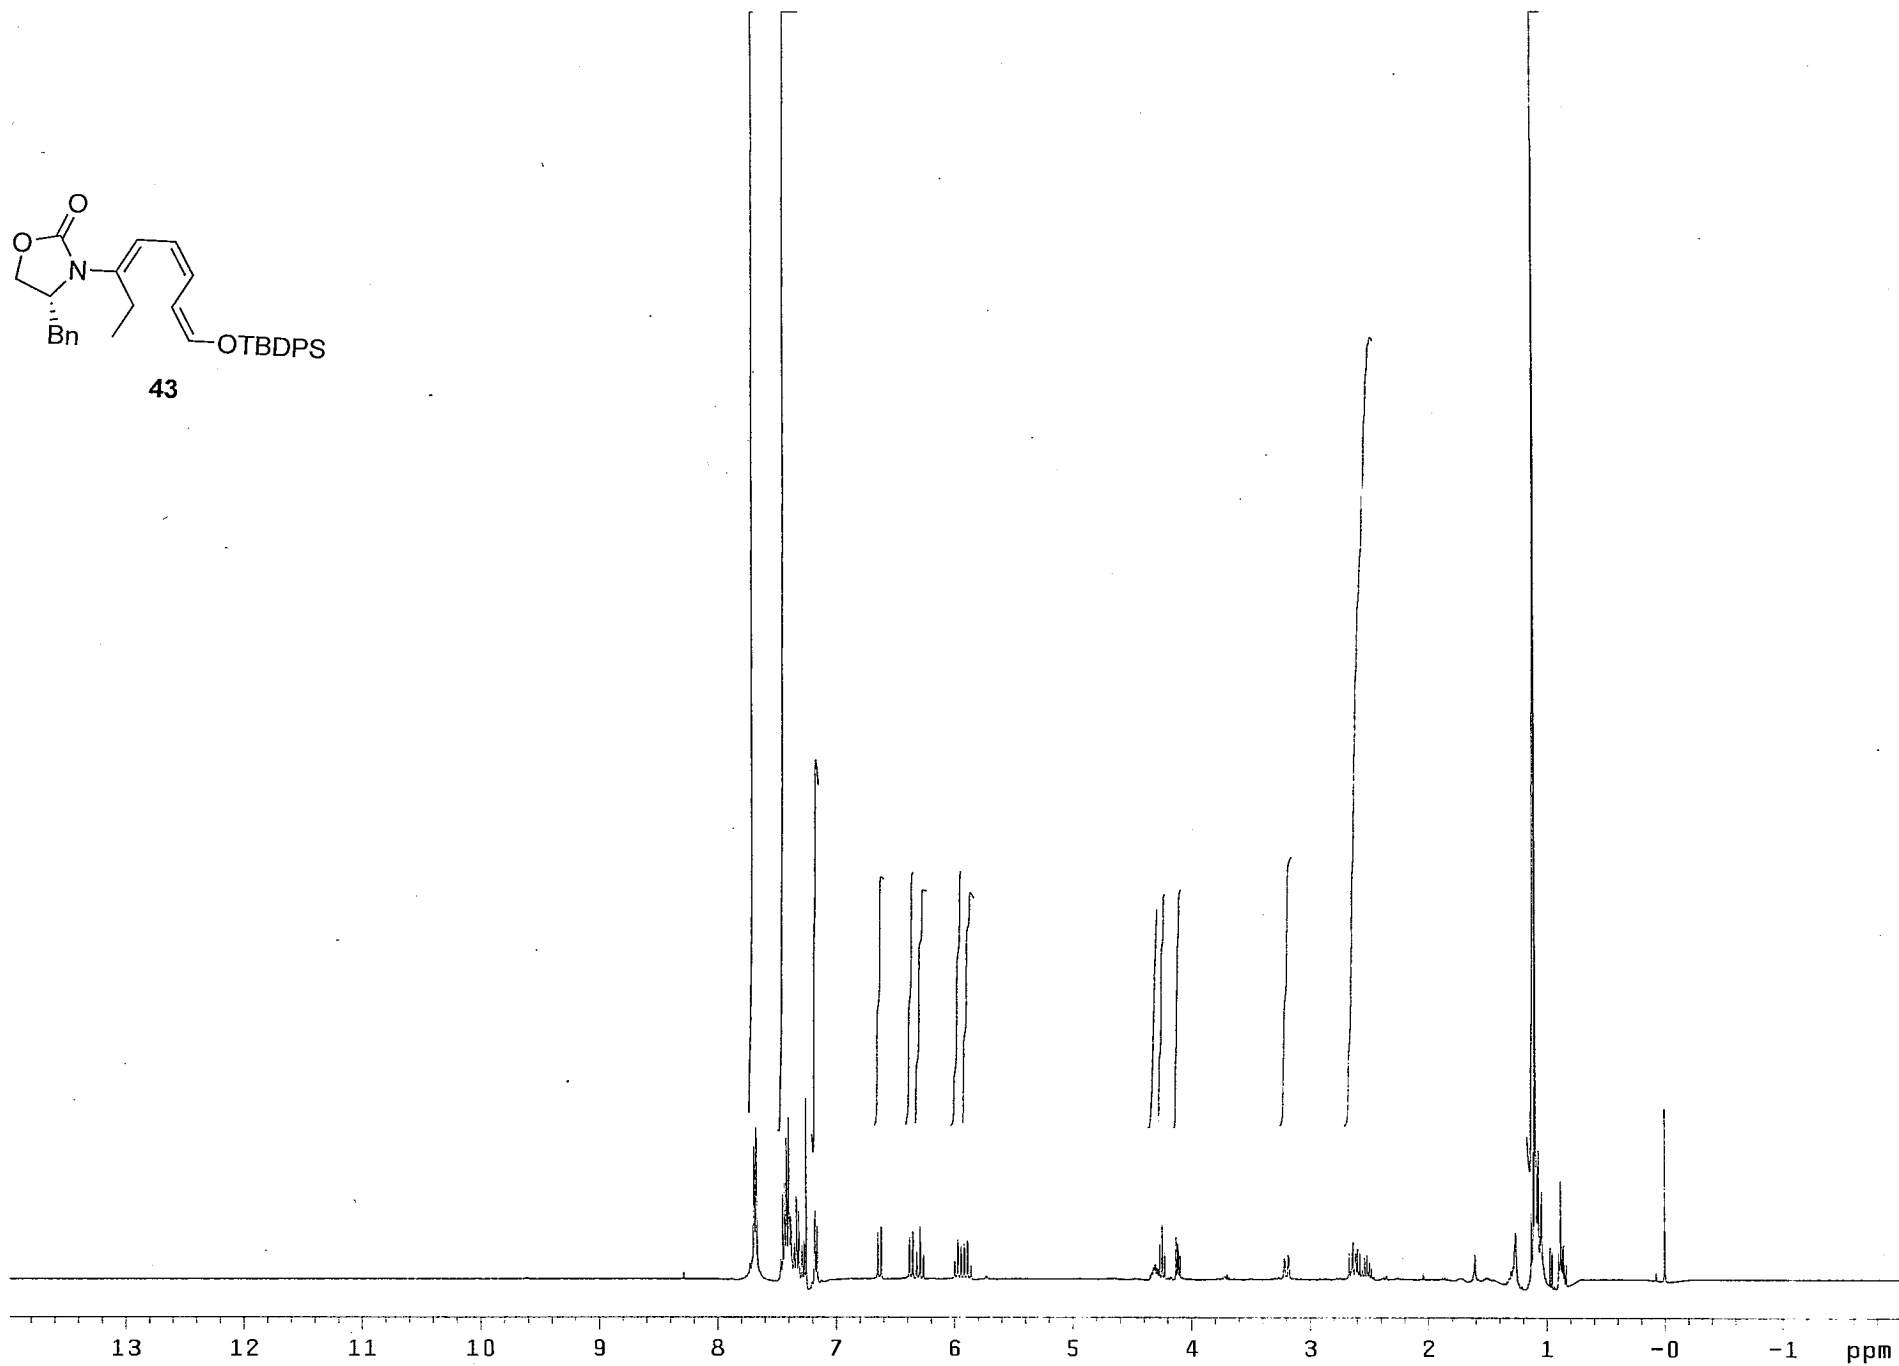



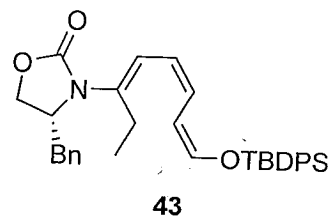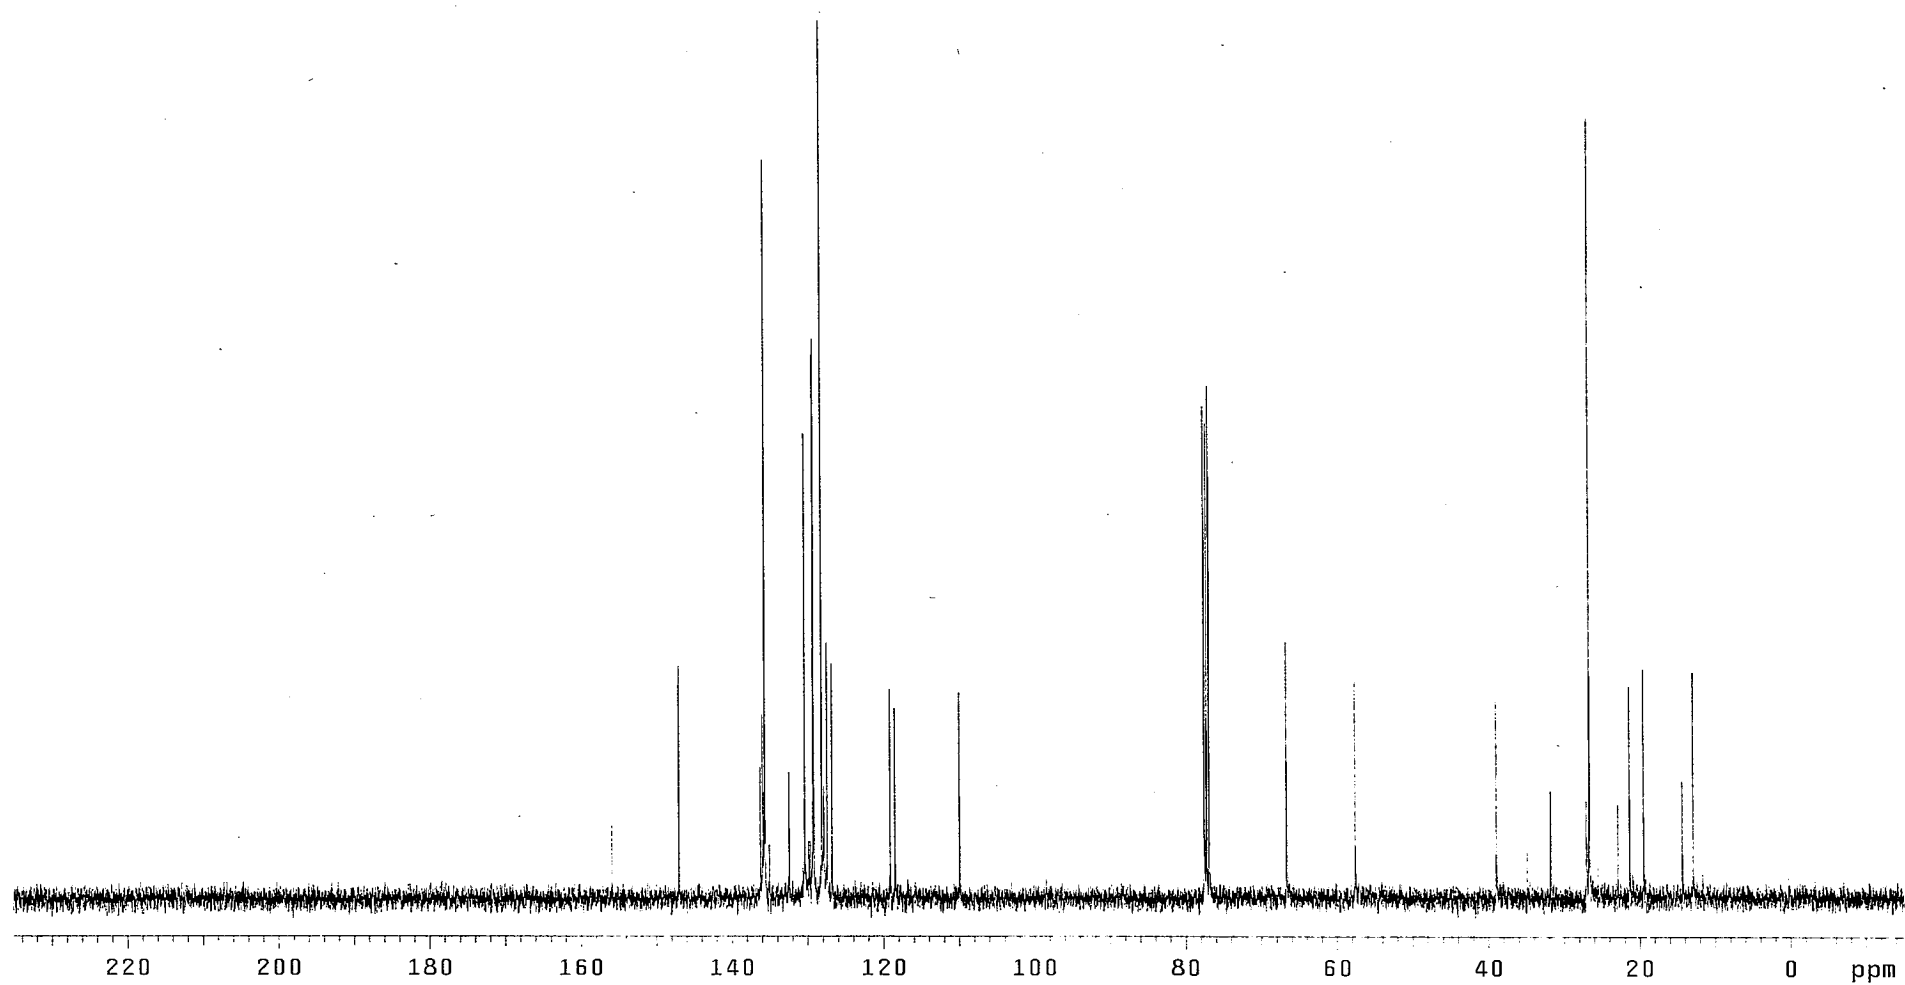

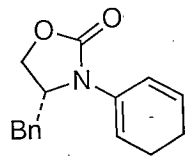

44a

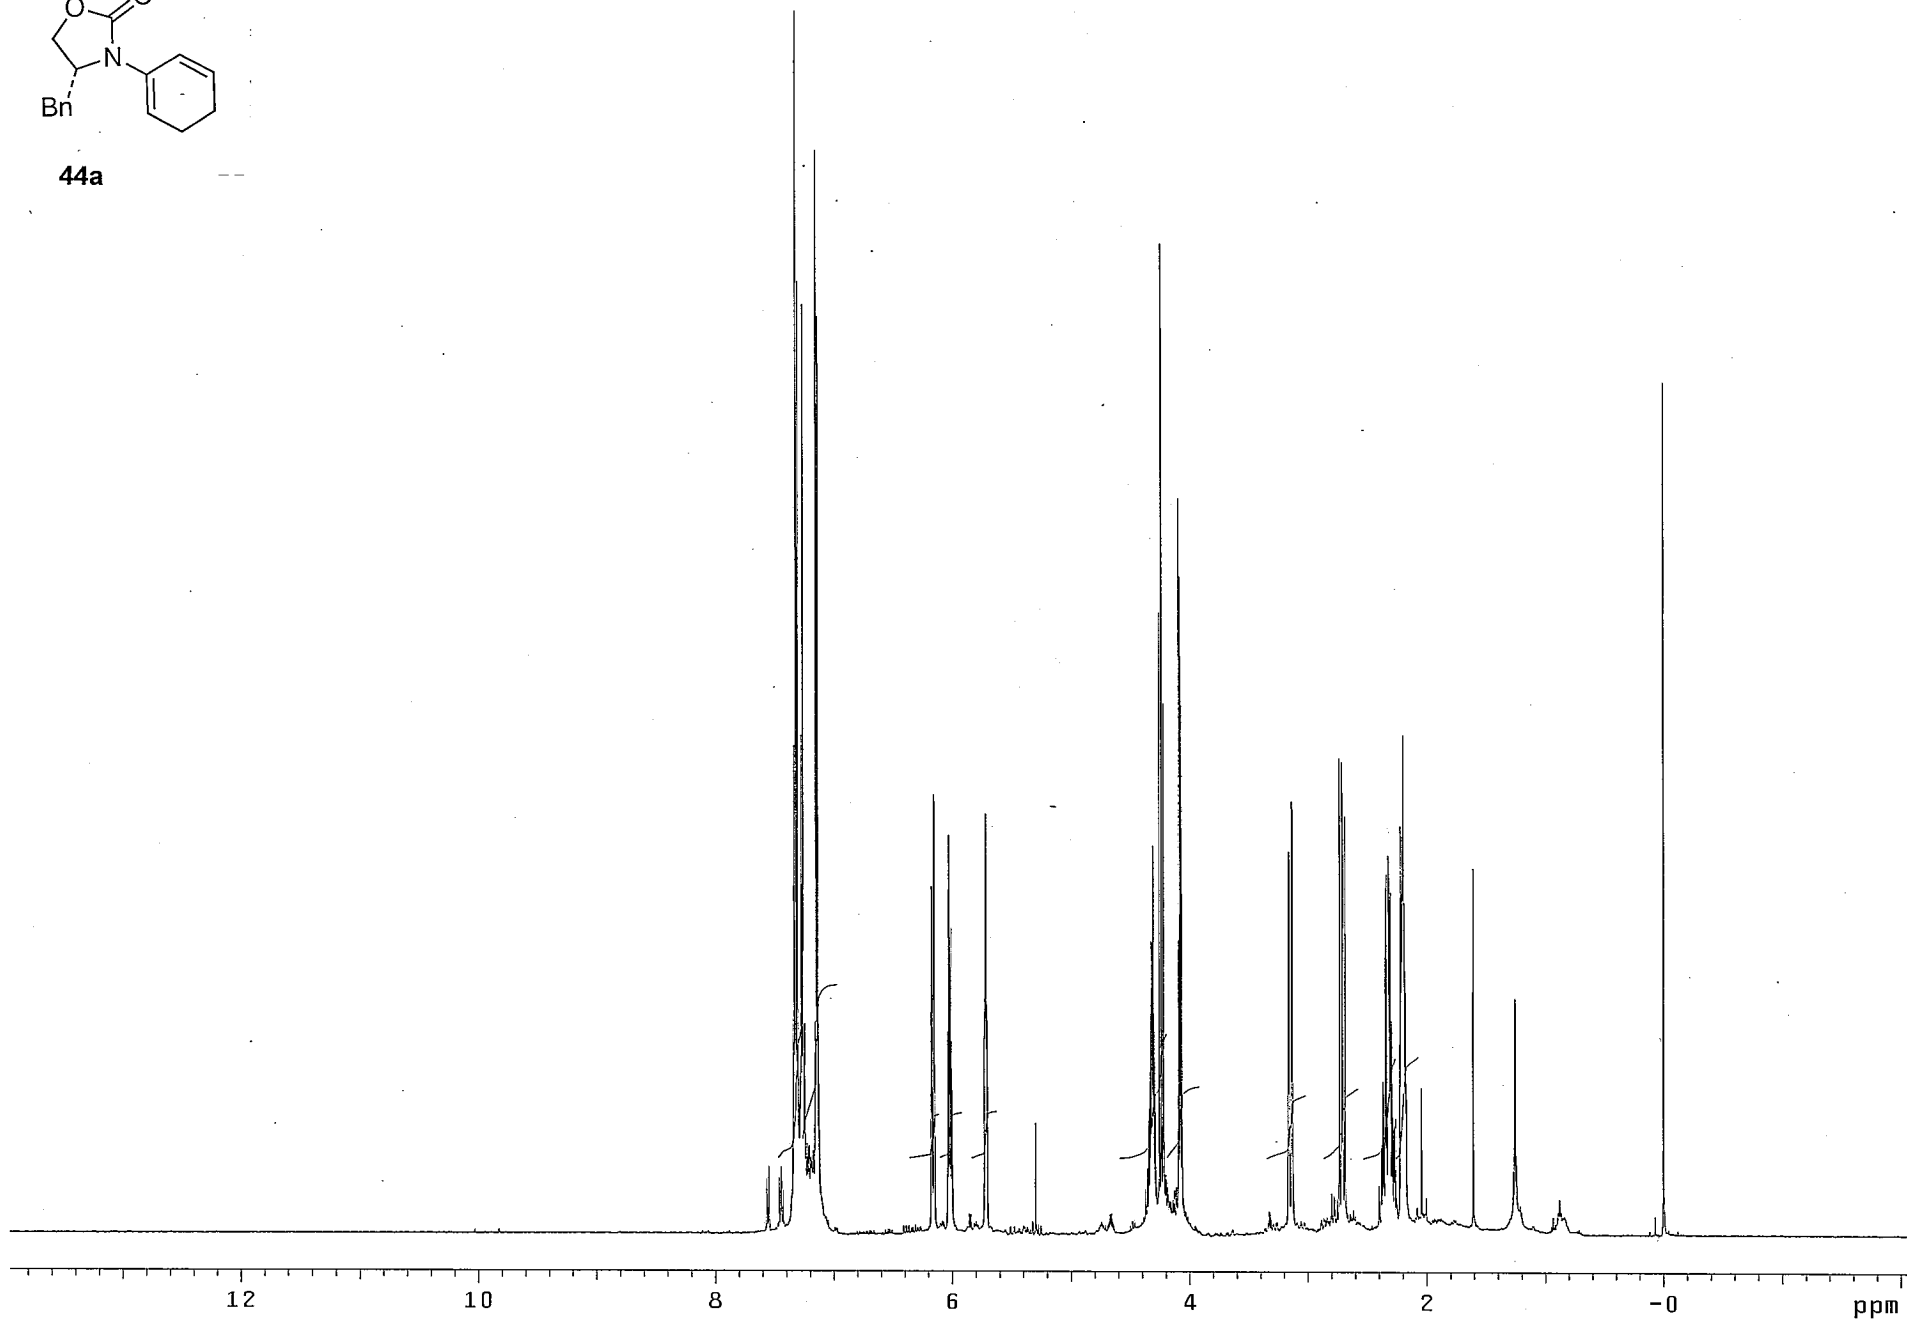

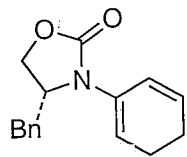

44a

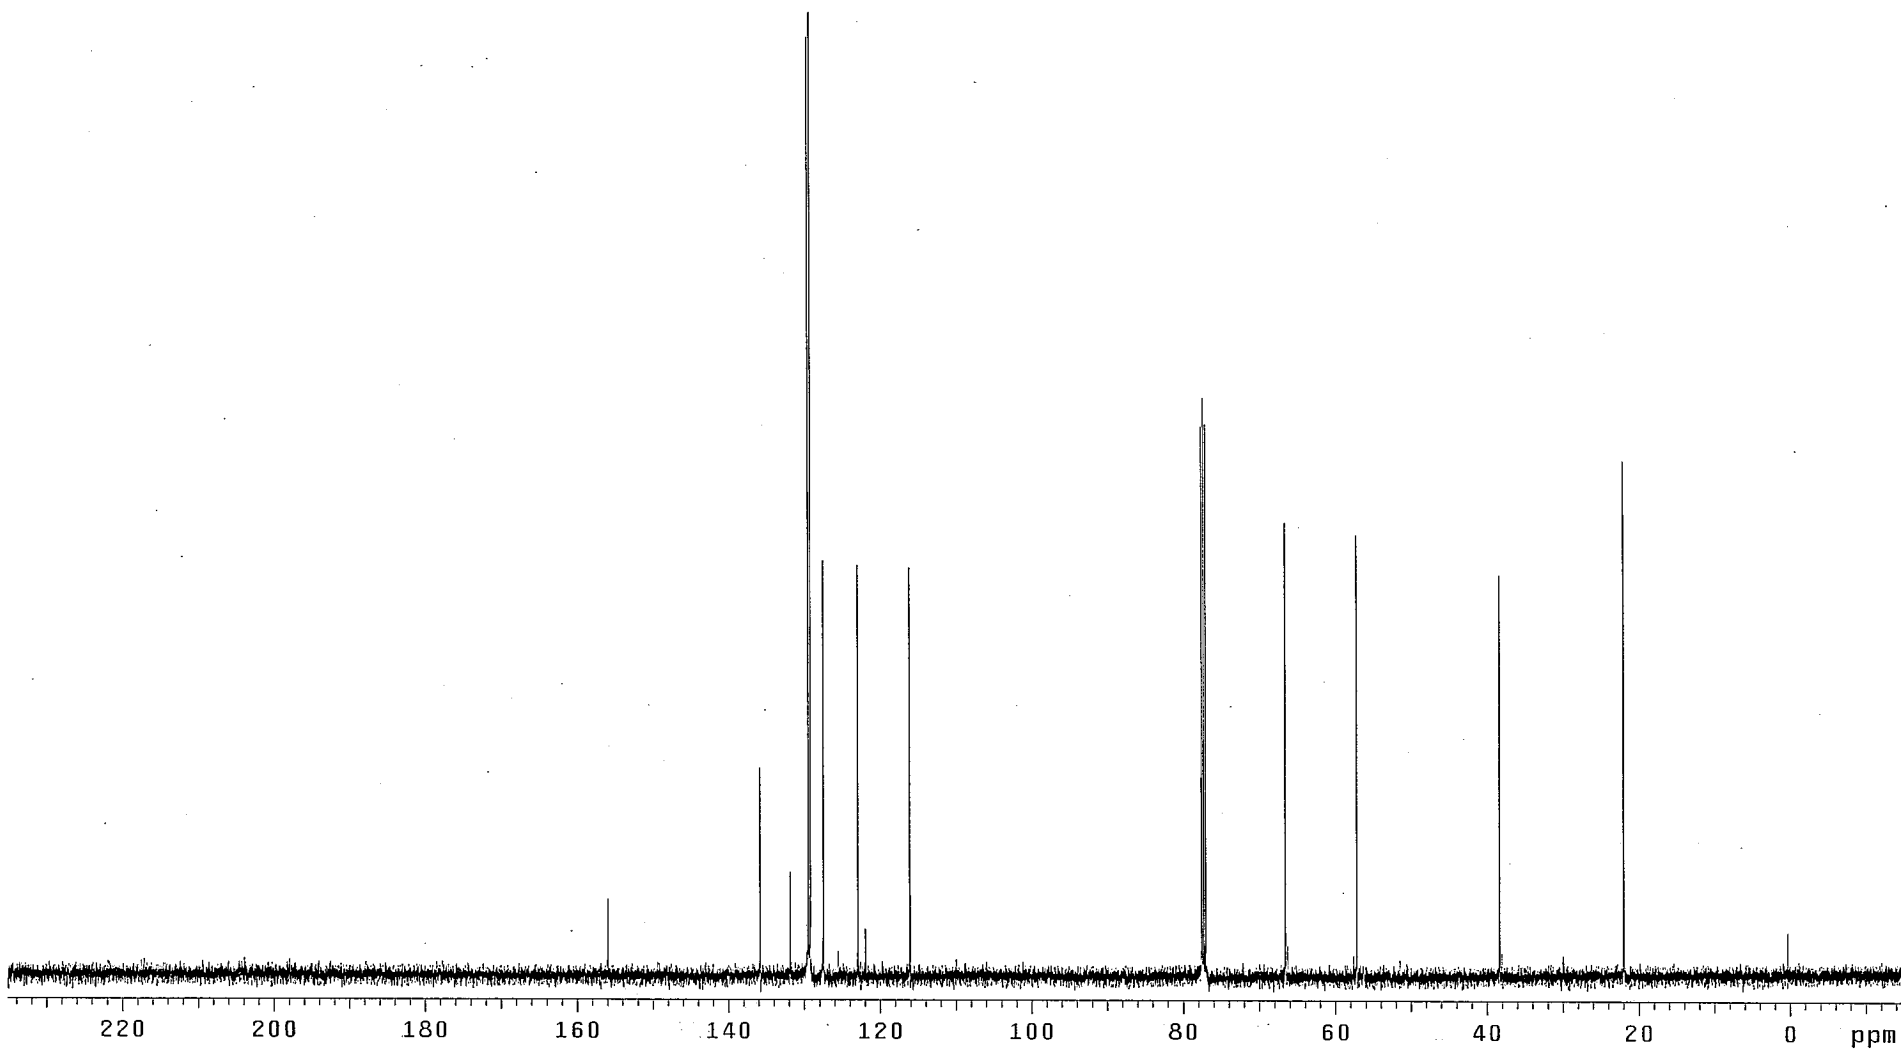

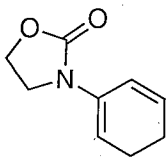

44b

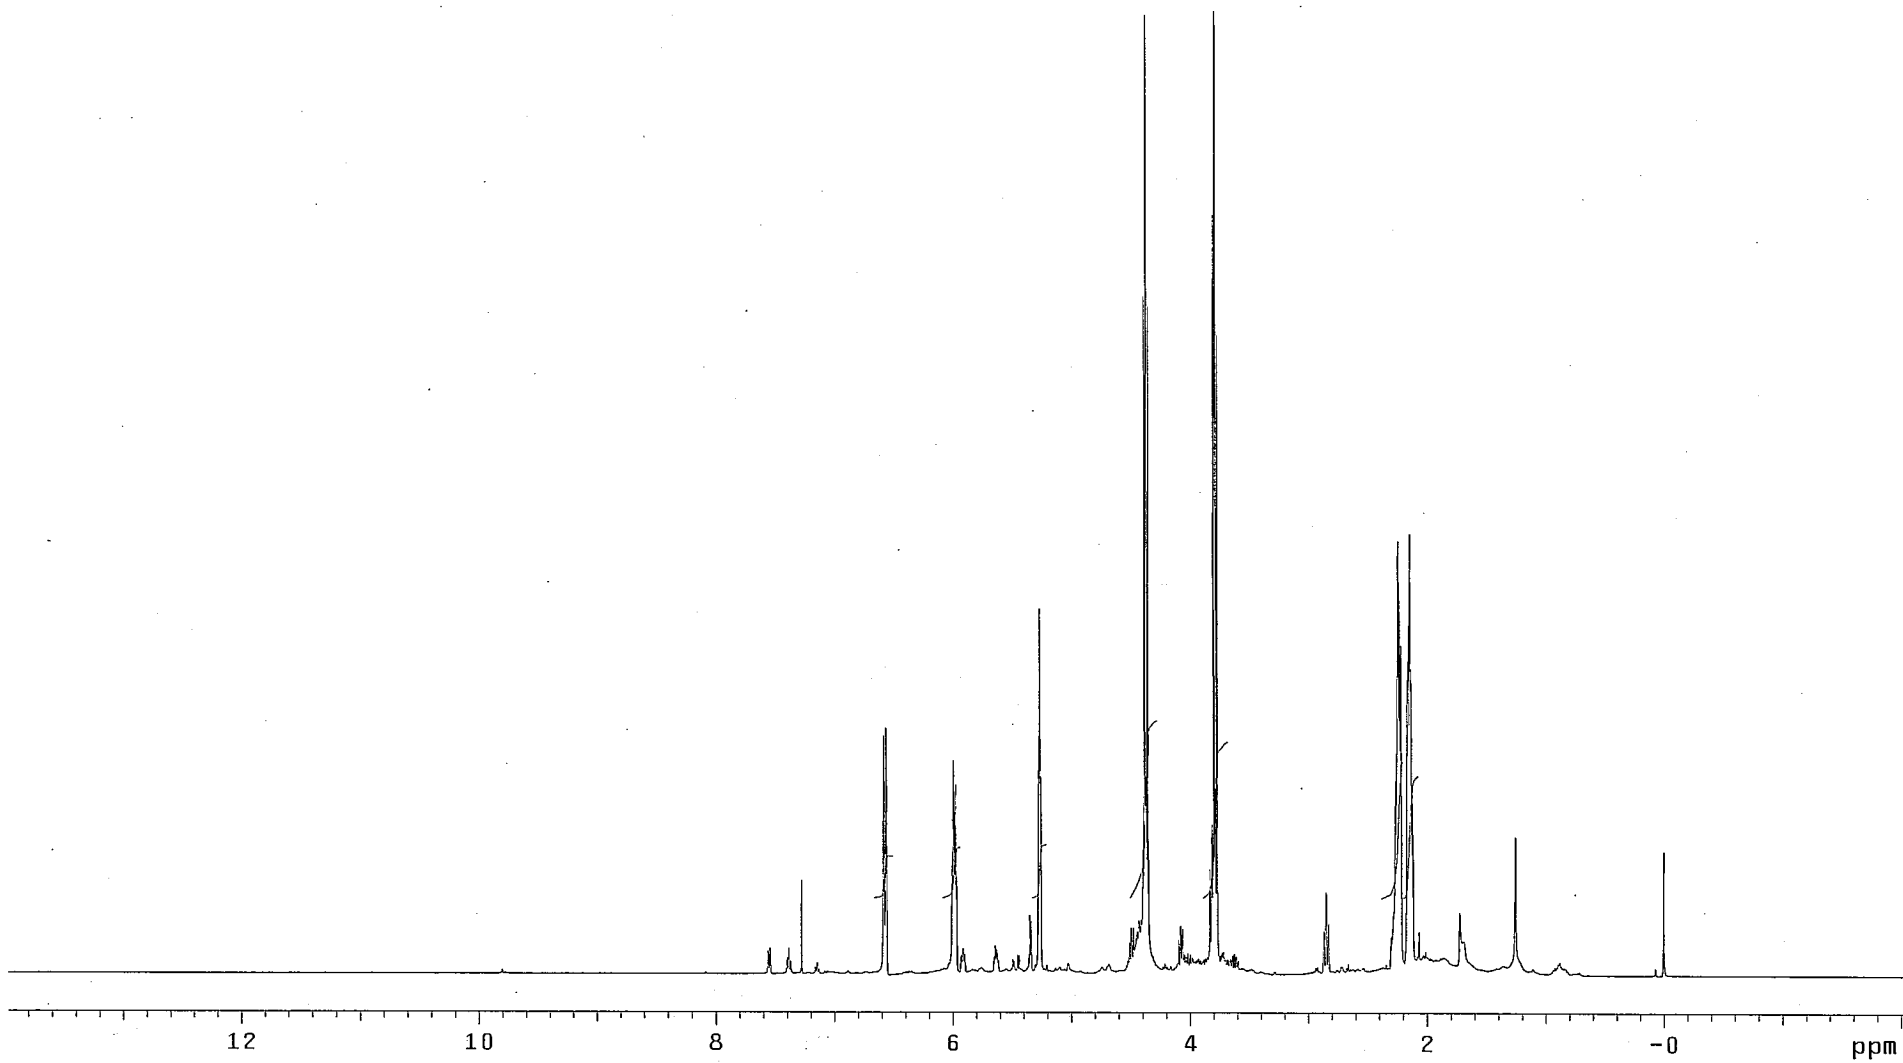

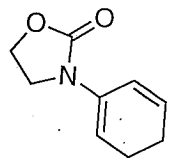

44b

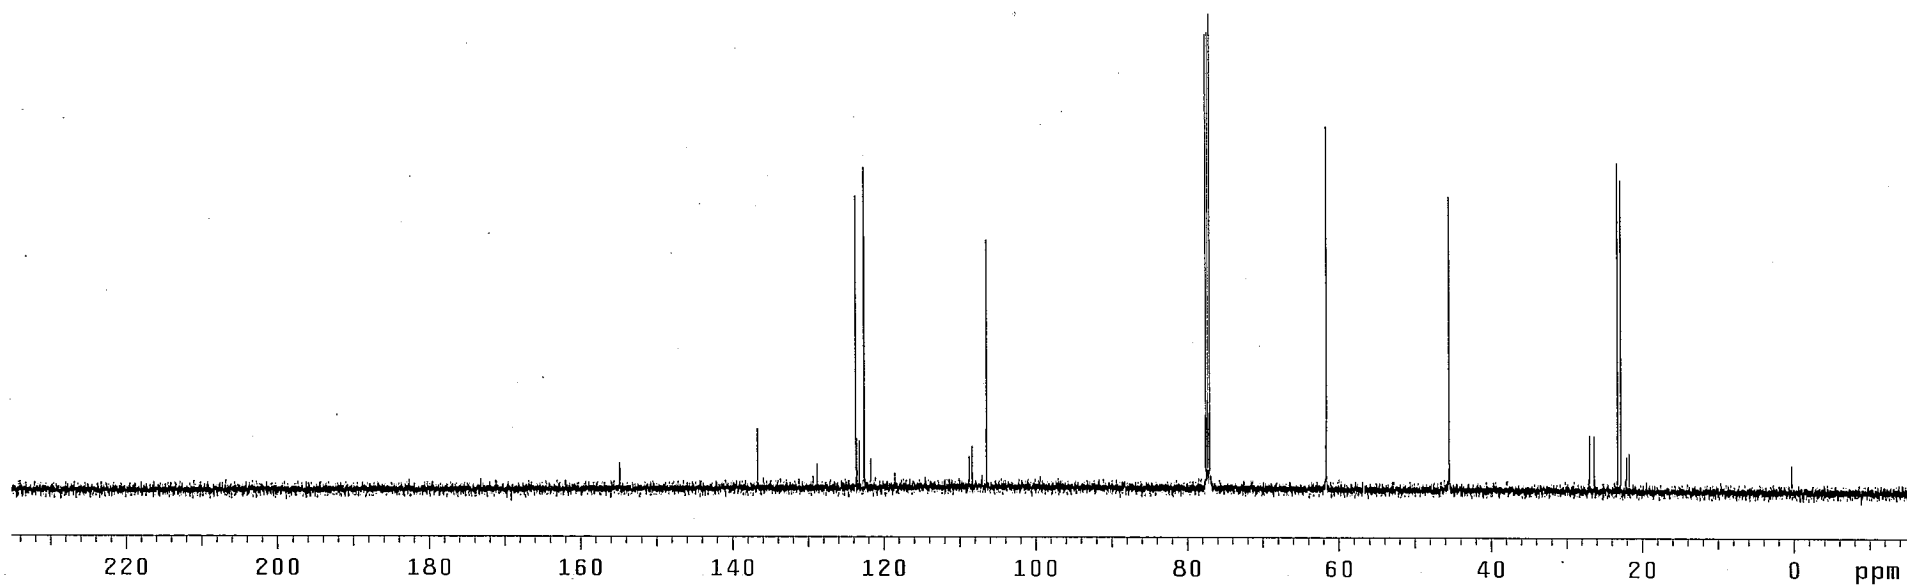

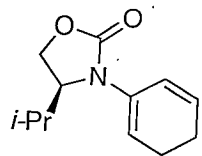

44c

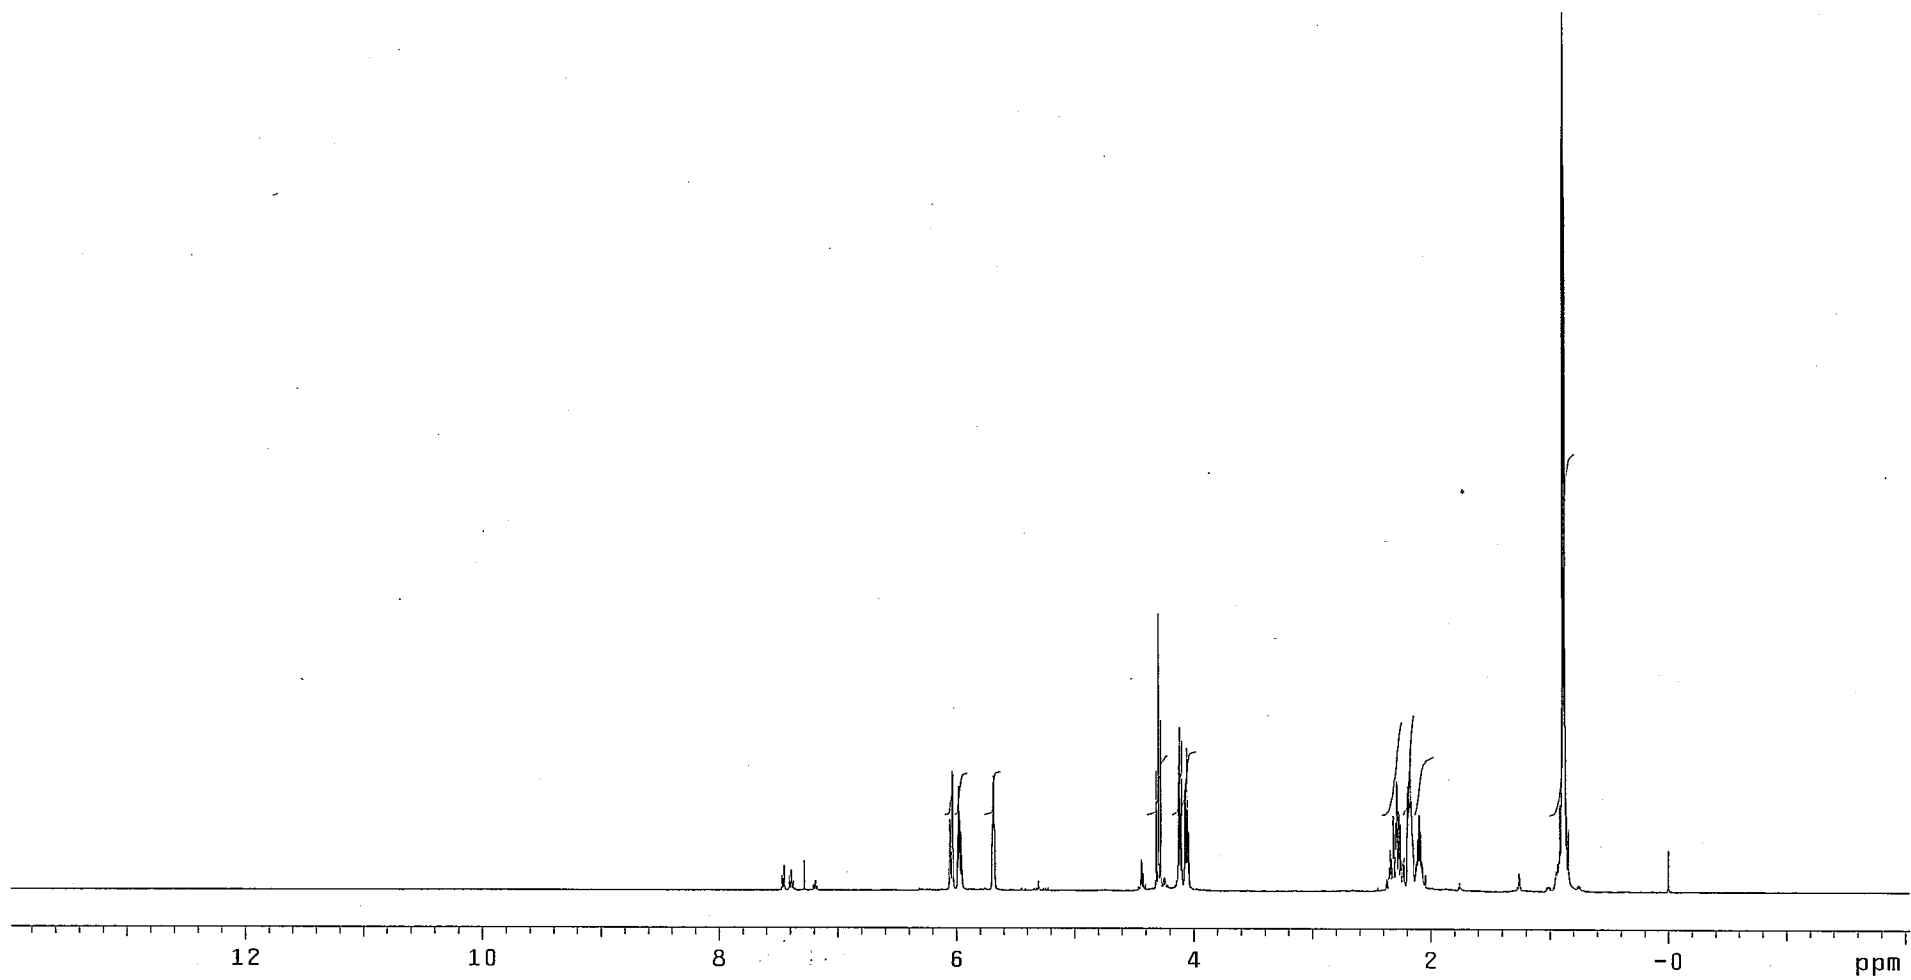

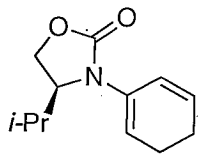

44c

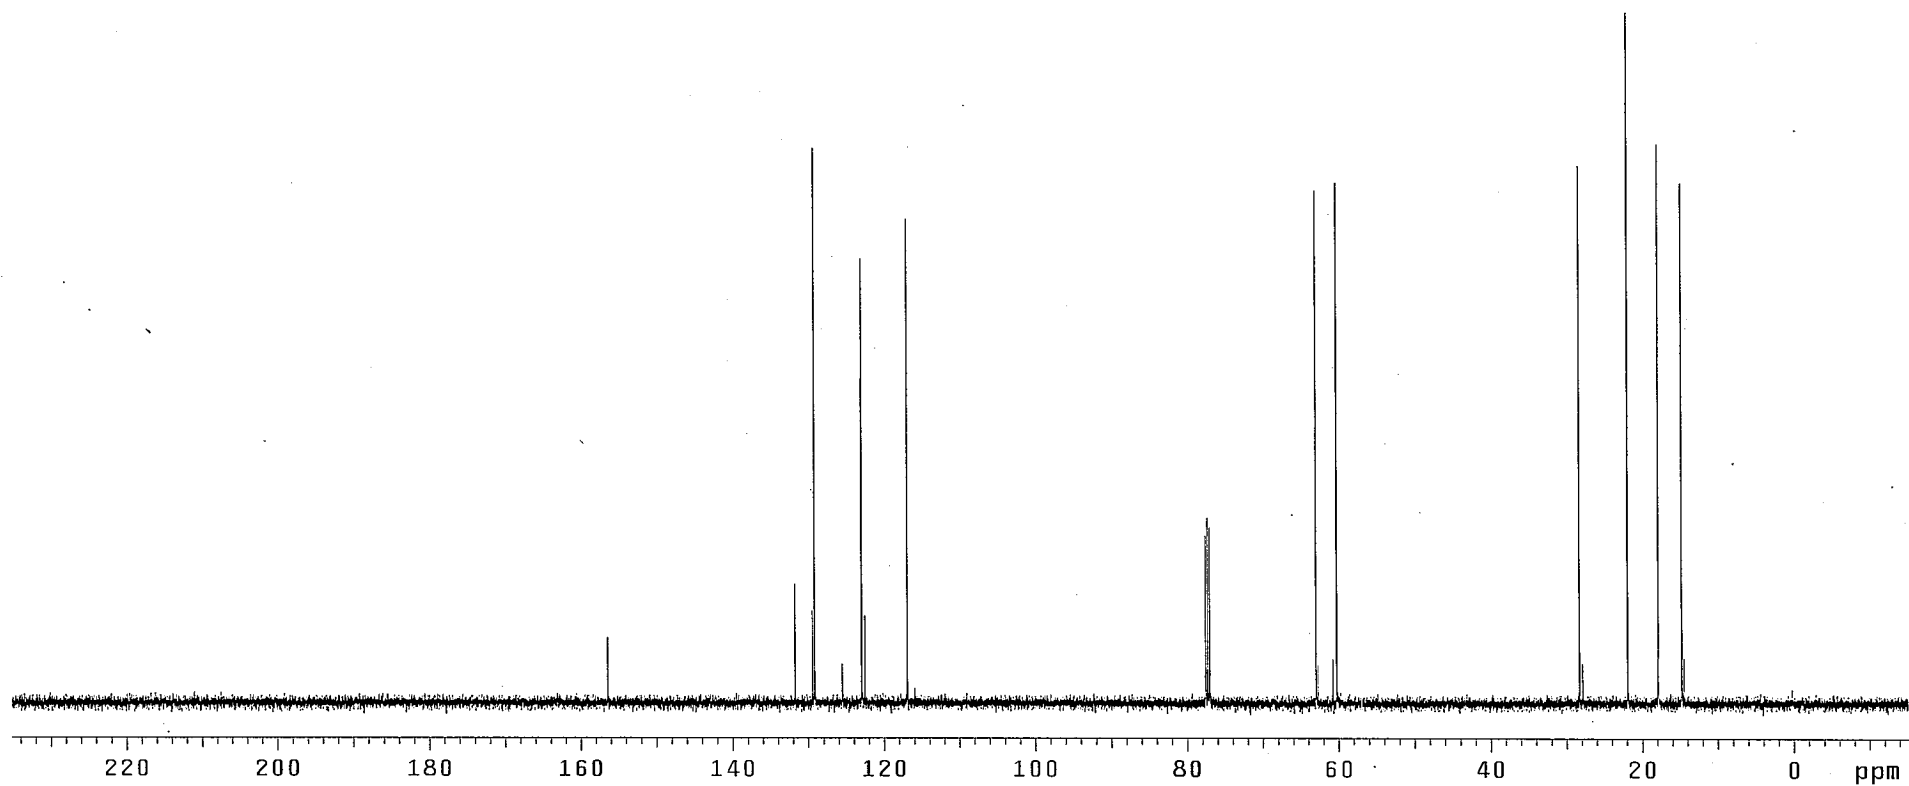

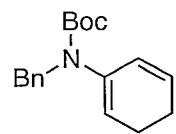

45

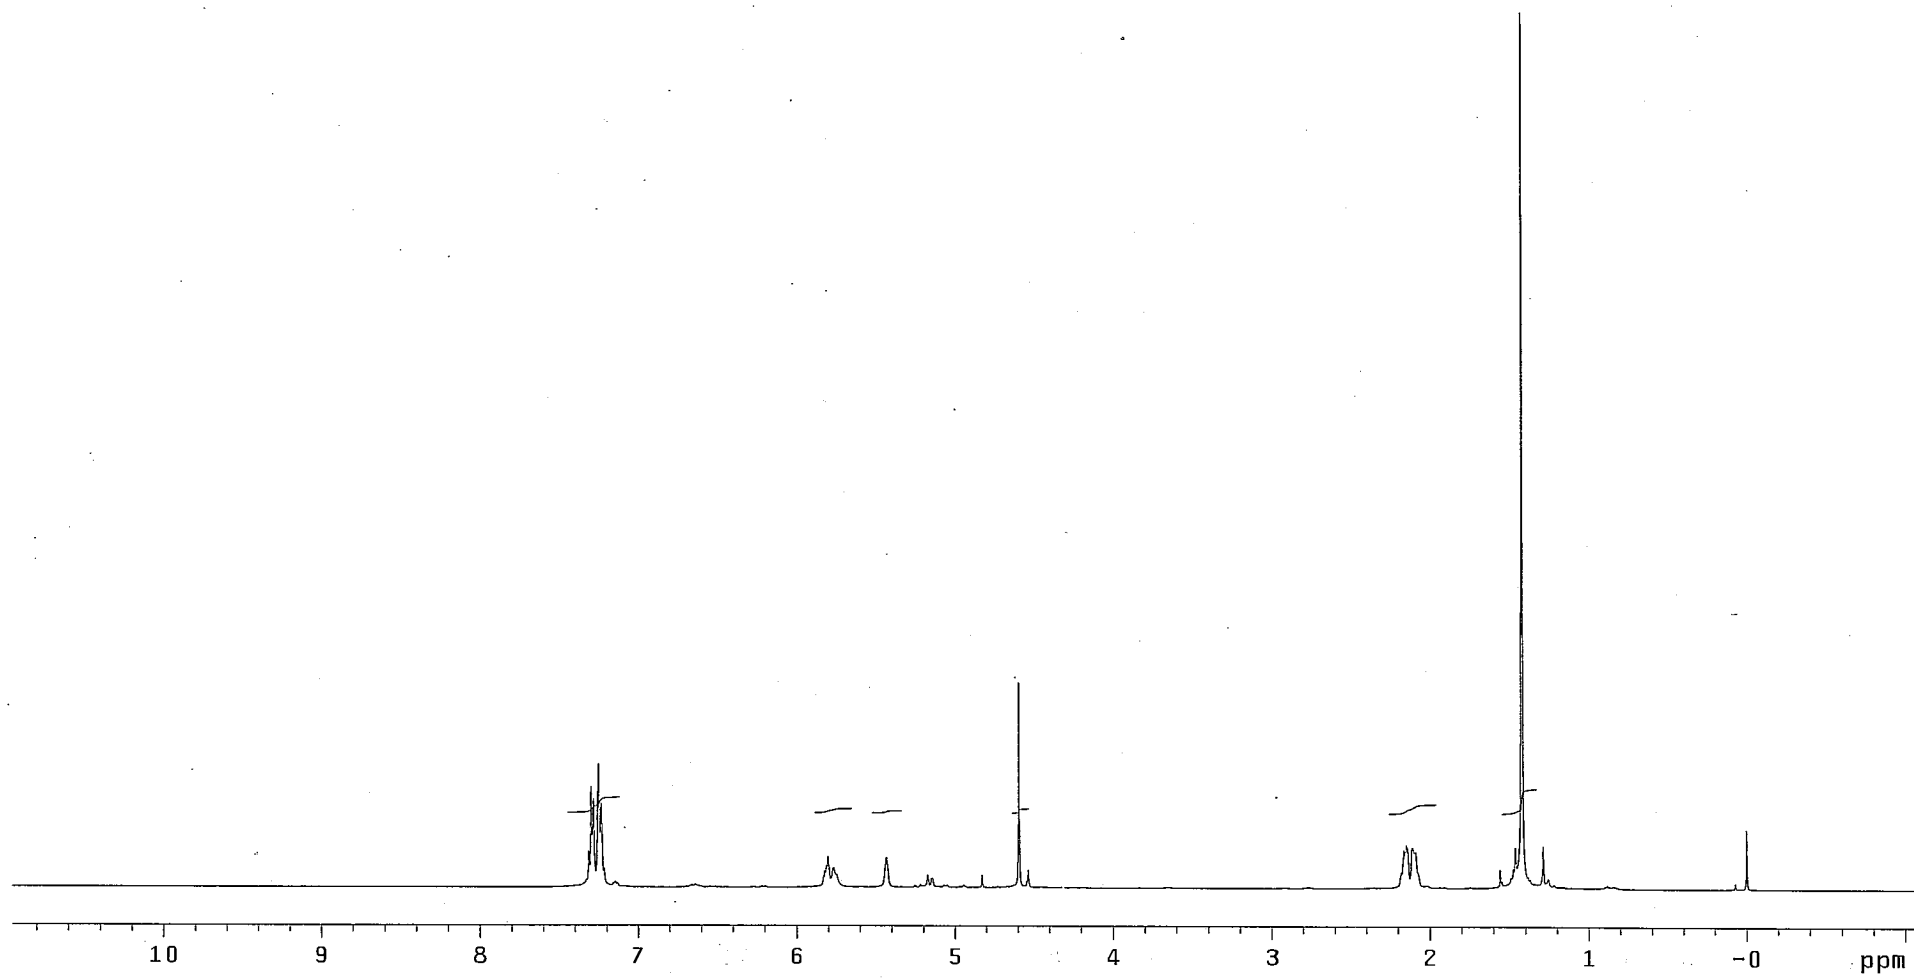

S181



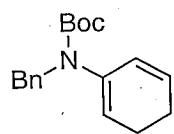

45

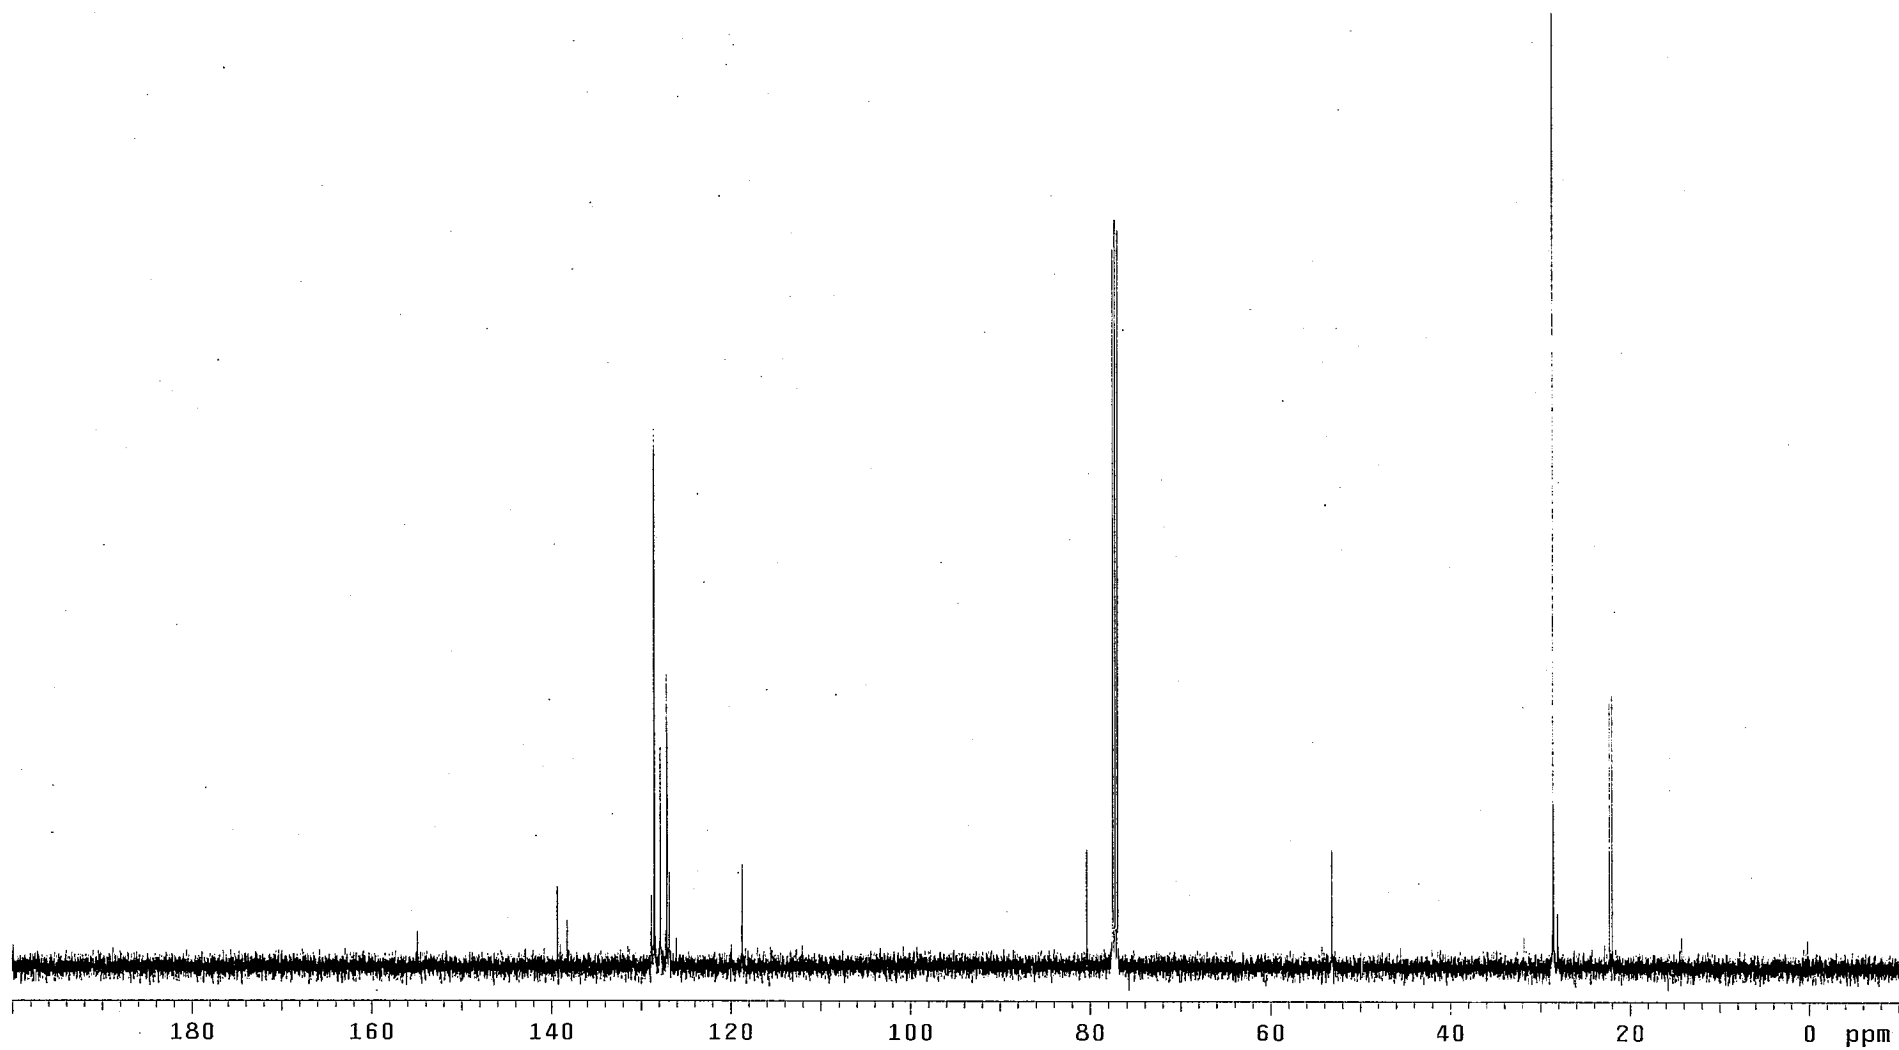

S182
